# Supplementary material for: Serum metabolomic profiling reveals an increase in homocitrulline in Chinese patients with nonalcoholic fatty liver disease: a retrospective study
Source: PeerJ. 2021 May 3;9:e11346. doi: 10.7717/peerj.11346 (PMC8101472; doi:10.7717/peerj.11346)
Supplement: Supplemental Information 1 — The data were analyzed using XCMS software for peak picking, peak alignment > peak filtering and peak filling. The data were normalized using Excel 2010, including Retention time (RT), MZ, Observations (samples) and peak intensity [file peerj-09-11346-s001.xlsx]

## Sheet: raw
ID	mz	rt	QC1.mzdata	QC2.mzdata	QC3..mzdata	QC4..mzdata	QC5.mzdata	QC6..mzdata	QC7.mzdata	S1.mzdata	S10.mzdata	S11.mzdata	S12.mzdata	S13.mzdata	S14.mzdata	S15.mzdata	S16.mzdata	S17.mzdata	S18.mzdata	S19.mzdata	S2.mzdata	S20.mzdata	S21.mzdata	S22.mzdata	S23.mzdata	S24.mzdata	S25.mzdata	S26.mzdata	S27.mzdata	S28.mzdata	S29.mzdata	S3.mzdata	S30.mzdata	S31.mzdata	S32.mzdata	S33.mzdata	S34.mzdata	S35.mzdata	S36.mzdata	S37.mzdata	S38.mzdata	S39.mzdata	S4.mzdata	S40.mzdata	S41.mzdata	S42.mzdata	S43.mzdata	S44.mzdata	S45.mzdata
1	55.0539	57.813	5472.69	7204.68	7862.7	6943.27	7981.66	7509.35	7537.31	11858	13146.9	11449.6	12507.2	12363	9186.3	17831.6	19365.5	17823.9	28957.4	14514.7	36694.2	41818.6	12843.5	10744.8	10809.8	9802.36	11749.7	13419.9	46683.1	13642.2	33174.2	14263.7	11867.1	5298.85	6181.12	6246.04	7994.58	5314.03	7421.18	7233.45	5692.25	7477.3	41136.3	6771.32	6335.49	7164.22	5244.67	5074.74	7542.77
2	57.07	707.646	11959.4	10218.9	11848	12476	11230.5	10678	10764.2	14444.1	15181.9	14228.3	14120.9	13021.4	13792.1	48882.3	17139.6	14067.4	18661.6	9339.67	15658.5	11470.4	3671.32	9864.22	10167	10990.3	11129.8	13026.1	16017.4	9025.03	13632.4	11319.7	9361.44	9307.94	8715.94	8769.25	8767.8	10596.8	10091	9761.84	8935.6	11079.4	14975.2	9791.11	8005.89	8818.89	11532	9488.16	8543.4
3	59.0493	510.559	3642.99	3838.15	3956.98	3538.4	4461.34	4738.26	3862.13	27004.7	25322.5	26355	26045.8	25528.4	29885.7	114851	26312	22840.8	23000	26284.9	26175.1	22987.6	24586.2	25375.4	26670.5	22569.4	23539.8	25732.1	20010.2	22128.5	25706.3	25990.7	23319.5	4267.35	3964.81	2782.09	3845.96	2967.73	3110.78	4235.27	2521.92	4132.83	23246.3	5606.78	2549.26	4413.81	4482.71	3499.3	4492.39
4	61.0394	43.4149	87581.8	90449.9	91650.6	89801.6	92619.2	94881.4	95327.5	197120	112809	157054	166132	137818	135819	165137	170089	188718	132981	121219	191452	206234	125222	158749	103129	103655	138474	132186	211066	162495	163096	145670	136986	76320.2	86452	87608.1	96702.4	88690.9	88299.8	78592.2	84151.9	112473	180933	70599.4	83882.3	95708.6	81175.1	88628	89862.6
5	70.0636	43.334	22151.2	20842.1	23242.2	22614	26291.8	23829.5	25478.8	36335.9	41106.4	35527	38260.2	41375.8	32615.6	41383.5	38483.2	42784.3	45474.5	57725.2	43611.8	57597.1	29986.9	33383.6	27530	24722.7	47253.1	37571.9	58853.1	24569	56706.2	39043	20269.6	14503.4	17612.6	24028.7	15178.8	13102.9	18570.8	22146.8	11848.7	15355.4	82012.1	20956.3	21632.4	11979.3	19551.1	21236.9	24977.1
6	72.081	57.8004	344866	348540	347873	347874	346357	361798	356686	661756	654627	637570	608930	593630	468683	884579	934945	947416	1.29814e+06	691113	1.68591e+06	1.98267e+06	613133	538919	529956	448187	725741	676888	2.17677e+06	691427	1.43892e+06	657179	545898	266370	346406	292529	342987	286508	361515	346166	290295	336820	1.88027e+06	333155	315823	322249	271734	243922	337847
7	73.0839	57.8828	13612.8	15295.2	14542.5	15701.5	16434.1	16209.9	16149.1	29975.1	28547.8	28399.3	27995.3	27078.8	22876.5	40939.3	39353.3	42875	62531.8	31816.8	78346.8	95161.2	26082.8	24627.5	23084.5	19584.4	33361.2	31187.1	93230.8	32958.6	67778.3	30085.6	25698.2	11320.8	15604.4	13340.8	13940	13186.1	17165.6	16016	11823.9	14736.9	86449.9	13821	16031	13536.5	12939.5	10686.8	14971.3
8	75.0259	85.5902	1074.96	1164.74	1291.9	1703.56	1851.34	1213.56	1797.65	40817.7	31323.6	35209.9	41828.4	41833.4	25780.1	39747.3	35244.1	53845.7	50321	45306.6	90887.1	85902.1	30412	42832.3	42239.6	21782.9	38848.6	27846.4	77644.4	33209.5	75937.2	23192.5	31089.4	913.993	1218.29	578.263	601.655	897.21	945.134	1181.71	766.371	1235.76	98150	838.507	933.579	6824.94	1163.7	1931	1052.33
9	80.9477	40.5304	184034	190074	189228	193534	188094	195376	189337	274319	278561	262566	283441	281983	258943	344852	291295	311337	519407	275457	566620	515921	257227	261182	287077	225523	265378	241281	503824	248960	507800	256929	236631	181618	178903	184593	180090	181477	179051	174662	165228	184984	514107	179292	171883	216934	167782	164327	170297
10	81.9375	22.1427	36825.1	35672.4	39614	39175.7	38892.9	40597.4	39713.5	43814.1	40275.6	41854.1	43407.1	43755.9	40165.8	24368.1	43717.1	43703.2	41025.7	45620.9	43305.3	42606	40083	39769.7	38590.3	39841.8	37300.2	41802.1	42710.2	39182.3	40990.8	42685.1	41717.8	39004.4	41485.3	38820.6	39221.4	38494.3	39301.7	39732.4	39612.4	40475	41575.8	39251.3	40140.3	41399.3	37196.1	40307.2	39788.8
11	82.9471	40.4595	63479.2	61248.4	69817.5	66712.7	64226.3	66540.5	65020	88409.1	89453.2	87969.4	90720.7	96211.5	87377.2	113020	96490.7	98819.4	160794	88086.4	180669	159708	84519.9	83135.9	93499.6	78560	90983.1	84356.7	166683	88837.6	158629	83263.3	81437.8	61436.7	59761.9	65252.9	61667.3	64440.1	63464.6	58007.1	57888.4	62344.6	166408	58072	58135	74410.8	54796.5	57008.6	59705.3
12	83.0754	366.785	10834.6	10463	9547.53	11252.4	10383.2	10048.6	10394.3	4844.12	7232	7533.1	7518.05	6774.8	7315.84	6573.13	5658.11	6033.85	2606.43	5593.06	2952.29	1900.24	5471.01	6809.47	5604.92	7219.48	6307.28	5432.13	3056.82	5252.81	4046.18	5523.44	6918.86	2698.62	2307.93	3358.05	2168.72	3242.36	2113.35	3852.16	1972.17	2819.74	3421.32	3876.88	2745.64	2412.42	3462.87	2849.45	2414.57
13	84.0474	59.0701	12604.3	13696.5	11291	13932.7	11001.5	13486.2	11032.5	21875.6	33201	33258.9	25723.2	35089.2	29867.3	40647.6	27139.9	39401.5	57614.2	29908.8	82589.9	83801.6	21467.4	37878.6	22836.4	22748.5	36148	28543	103493	25985	100821	25457.3	20683	12533.4	13320.9	11340.4	10916.1	8585.71	10446.2	12944.3	8240.11	12638.7	163275	10862.6	13891.7	12185.7	12181.6	11480.4	12251.5
14	84.9604	29.0364	57166.3	59848.3	60395.7	55989.2	62821.1	56831.8	58673.9	26676.7	33925.7	26553.4	24778.3	24559	31137.2	31092	36922.7	26368.1	182120	23630.3	25351.6	22573.6	25518.3	30097.5	26547.6	24948.8	26476.2	28867.5	34654	26170.7	20155.1	32816.7	25085	68472.1	59369.9	67186.9	58670.4	51221.4	60390.1	63036.9	61660.5	59990	28898	60970	69611.4	65310.2	61044.7	67098.9	56637.3
15	86.0967	74.1155	1.01961e+06	1.0074e+06	1.02534e+06	1.03186e+06	1.02552e+06	1.06466e+06	1.06701e+06	1.41168e+06	1.55128e+06	1.45993e+06	1.48281e+06	1.51515e+06	1.08183e+06	2.1687e+06	2.0344e+06	2.4943e+06	2.61751e+06	1.65216e+06	3.0625e+06	3.53592e+06	1.45029e+06	1.27361e+06	1.31195e+06	886361	1.97115e+06	1.67838e+06	4.01702e+06	1.59847e+06	2.5759e+06	1.56057e+06	1.24804e+06	793867	1.09677e+06	984524	1.10643e+06	855272	1.19737e+06	999265	883752	1.07242e+06	3.44105e+06	958040	953780	970752	843211	779851	945669
16	87.0458	339.632	13265.6	11012.7	13634.8	12180.9	10731.2	11637.4	13369.1	1271.75	984.381	601.67	498.21	1158.67	1420.89	1111.73	1191.81	1171.93	508.342	1564.88	1518.24	971.377	356.888	280.193	995.705	939.84	902.221	1205.13	800.906	936.302	1892.24	788.717	1054.26	867.785	1289.97	803.067	1039.09	1178.4	1011.83	652.83	1177.3	1064.33	1142.87	960.856	1211.44	1150.94	445.025	666.362	1232.22
17	87.0992	74.1155	59377.7	59697.4	61659.1	59260.4	60529.9	62216.5	60661.3	77246.7	87389	82035.5	86126.1	88133.2	65067	121888	120664	142034	144469	93988.7	174216	203588	79814.2	70806.8	73734.4	52753.5	116518	95750.6	225427	91545.3	153693	86260.1	69800.3	46917.2	62392.7	57266.1	61239.8	50575.3	68192.6	57688.6	52585.5	63286.6	198879	54864.3	55333.9	56896	44889.8	45093.2	55401.4
18	90.9761	37.3821	209856	213441	210326	216000	221530	217044	219837	292259	276994	292746	292960	278568	271996	307059	293466	292441	242033	281202	249709	246642	274344	268092	272933	275992	265127	284695	236040	269591	236897	291083	273792	203081	207923	207069	207037	218023	211672	209911	213724	224301	245999	211477	200419	217017	206987	218672	209883
19	95.9543	25.0537	10246.2	11545.6	15807.5	14162	11217.4	13820.8	12551.3	18359.4	16440.3	15502.3	16064.9	15976	14329	6466.86	15086.1	15456.6	16600.4	15429.1	18850.9	17301.2	14681.6	13245.5	14048.9	13859.1	16100.5	13642	14717.2	13056.1	15866.6	18038.9	13147.1	12494.3	12444.6	15105	13301.7	13173.7	11555	13567.3	13453.8	13691	17093.5	14006	13941.1	12583.6	13697	13508.4	14655.2
20	96.9605	17.0668	72107.6	72633.2	65735.5	68386.2	71777.9	73040.7	67331.4	105076	123782	125687	109370	117314	110592	74378.7	58314	45730.8	85200.3	37909.9	111503	73668.4	36522.3	36073.1	36710.7	33861.4	36348.7	37684.7	59340.8	35725.8	78045.1	106475	34592.1	67463.4	72216.6	67810.3	72693	66803.7	70513.5	74473.6	68169.3	70758.3	109991	67995.1	75603.4	71426.6	67625	70678.8	71887.3
21	97.0984	468.502	20141.9	18809	22062.7	21250.5	20477.8	20307.9	20376.3	12099.2	9325.91	8217.19	6964.02	8628.28	8399.88	8531.61	7897.07	3963.21	3694.25	3908.01	8328.61	3787.2	4168.43	4668.95	3867.28	3178.94	3271.07	2866.88	3410.79	4127.53	4001.54	10770.1	2521.23	25115.8	25292.7	24863	26097.9	25130.6	24923.7	25480.3	27259.5	28913.5	7891.02	28272.1	24710.3	27114.3	29324.8	27985.8	28380.7
22	97.0913	365.62	23740.3	22053.5	24026	24881.3	23441.9	24409.8	22033.6	28253.1	24089	26616.3	21387.5	21860.3	21076.9	20177.4	14828.9	12689.5	11426.2	10657.2	27104.1	7934.19	12250.2	8712.19	8592.85	8724.11	8958.14	8539.85	8342.64	9335.47	7098.96	24705	8341.77	33640.9	31914.2	33328.5	33693.7	33165.3	32638.9	32399.7	34828.1	37500.4	24653.9	34451.3	33902.7	32131.3	35513.4	35340.4	34291
23	97.9685	22.8622	66535.8	67231.3	74742.3	67468.3	62217.2	72090.6	73325.8	41943.1	39265.2	38419.4	37264.4	39987	39633.9	22603.5	38299.2	36298.6	33997	36612.9	40905.8	33760.4	33497.3	33097.8	31328.7	33754.6	31771.1	33718	34331.8	32949.6	33709.1	40498.8	29894.7	68170.4	69021.4	65634.4	60916.9	67354.6	65835.1	63978.3	66249.4	67367.6	38764.4	67214.9	73896.7	70946.6	66001.4	71108.2	73014.1
24	98.9538	38.0175	15048.3	15975.3	7631.63	15994.5	8245.28	16113.8	18895.4	27686.7	30898.7	39512.8	24377.2	37950.2	25171.9	33514.1	9916.5	18753.6	21981.6	15700	36164.8	21406.7	16288.8	18093.7	9259.93	17880.7	17224.5	20979.9	22242.3	18308.1	21285.1	29044.6	16830.7	13959.2	15636.2	7353.39	14370.1	14474.9	16507.5	14723.3	15288.5	15413.5	16745.5	15674.2	7663.94	8401.8	14397.1	15489.1	15171.2
25	100.073	119.256	11850	12140.4	11746.3	16422.2	11583.8	11898.8	12494	13511	10181.9	32681.1	23341.1	10588.8	9842.69	116512	33390.9	12408.6	83734.7	3296.42	19167	43227	30747.9	13168.4	17301.7	11445.2	4636.78	3958.07	274874	8633.52	35489.2	30310.4	2646.96	5876.13	5380.98	5266.51	7519.14	6686.9	17973.4	11552.2	6044.83	7160.17	35836.1	6469.3	6998.14	27826.9	5872.11	23614.7	5458.09
26	100.932	21.5359	34732.9	37211	38341.1	36423.8	40647.5	36938.2	38388.5	33456	38277	38647.9	33870	36236.6	34881.6	25942.5	30438.7	25366	27398.7	28483.7	35316.9	24041.8	23844.1	22436.1	24196.4	23209.2	21750.1	24432.7	25445.1	23770	21592.7	30981.1	23393.8	34981.8	34535.5	39119.5	36124.1	37682.1	38309.5	34832	36335.6	37982.5	37328	38094.2	40005.3	37461.4	36720.3	36121.4	39229.9
27	101.059	367.388	22307.4	23046.9	25652.6	24123.9	24076.1	24149.8	25506.4	13644.2	12212.6	16191.4	12501.4	9426.84	12794.5	11815.5	15142.8	16038.1	12948.6	14191.6	12233.8	7540.71	12933.5	12964.4	13653.9	16957	15779.9	14604.3	9525.45	13704.6	23827.4	14282.8	12400	10404.6	9762.2	11069.9	9894.22	10731.3	10976.6	10718.1	11502.2	10067.6	9923.96	10555.1	10637.8	11446.6	10645.7	11537.1	10556.6
28	101.019	238.091	6472.1	6087.25	6181.41	5622.05	6835.99	4718.81	6076.55	41569.7	36260.5	36587.2	36752.4	33363.2	40571.7	37062.3	34507.3	31375.7	63674.1	30254.8	70684.9	64667.7	27538.6	29629.4	31853.1	27375	29151.7	28364.2	64768.8	29641.2	65789.8	34847.6	29453.2	5615.63	6321.12	5862.94	6896.25	5435.5	6229.52	5092.27	5639.07	5992	60232.8	5969.77	5688.18	7477.13	6077.94	6144.05	5250.97
29	101.942	18.4792	14963.6	16499.1	15639.6	16291.9	17373.3	17825.9	17060.1	17810.5	16715.5	16884	15635.1	17134.7	16513.9	13555.6	12315.4	9305.92	10461.4	8115.86	16751.7	8003.66	7735.64	7444.54	8323.7	6307.4	8994.08	7484.71	7657.45	7075.28	7667.74	16885.8	6435.66	17143.4	17215.7	16386.1	18562.7	15258	16910.7	15345.4	16646.4	16431.2	18418.9	16157	18911.7	18235.4	16968	17184.1	16829.7
30	103.053	128.575	18540.9	18594.1	18531.1	18178.4	20641	19689.4	19675	25935.2	31958.7	26309.6	24525	26913.4	20265	42555.8	30731.7	39885.7	57126.8	28465.7	71017.2	59375.6	28644.5	21532.3	25613.7	21558.6	32004.8	27212.8	76489.9	23775.1	68061.9	26229.1	25819.5	15684.9	21859.2	18402.1	16565.5	15695	18162.1	17250.9	16058.1	17290.6	64982.4	18368.1	15773.5	22350.5	13434.3	17594.7	17381.2
31	103.956	886.722	49151.9	57372.7	58028.9	59441.5	61085.9	59396.6	61993	564462	532064	545982	551650	545706	567932	675671	631707	577819	482273	507264	526940	310955	389721	282268	502134	526176	500145	487944	477839	499498	440693	534977	457999	52107.8	50490	49410.8	48938.2	48445.1	49673.9	50669.8	54063.9	51622.1	550908	47494.9	47938.2	49982.5	53649.3	53486.8	49242.2
32	104.106	39.0576	8438.19	8089.42	8794.2	9838.61	9959.05	9760.99	9513.03	48553.9	93329.6	66505.4	80732.3	94509.4	61971.9	102422	99358.9	164324	176670	94244.7	110511	145019	70321.3	92999.8	74107.9	49881.3	93336.6	82025.8	176908	80855.6	114435	71799.8	48039.6	22461.3	23109.5	14411.5	18497.5	7935.56	26637.7	9676.6	10177.5	12452.9	165723	11846.9	26022.7	36385.6	13907.2	14763.2	14313.2
33	105.091	339.799	28865.5	30113.2	32371.9	29637.8	30402.4	28517.9	30041.8	888.663	348.995	914.032	951.768	983.777	495.33	2519.14	965.929	951.079	570.709	1116.28	637.516	597.453	1261.51	1492.92	863.872	681.361	1084.07	724.272	1209.32	977.482	483.862	1526.56	725.293	245.595	367.218	227.131	347.414	611.928	222.068	250.606	441.588	307.135	1249.01	373.652	311.346	224.086	235.152	249.934	109.185
34	105.091	124.033	45003.6	43702.6	47333.9	47035.7	43191	44538	47681.2	1860.22	1608.08	2175.32	1113.11	1930.17	1688.26	1404.4	721.899	1635.99	1321.77	965.831	1761.9	681.99	760.385	340.178	934.32	461.103	1013.5	1146.24	1023.28	1345.56	731.276	1001.89	631.173	746.838	381.257	745.66	783.309	475.277	352.666	333.534	918.768	818.288	1865.94	853.792	481.605	892.249	481.096	226.967	1204.98
35	104.989	38.9616	7300.42	7679.37	7854.9	7275.72	7710.04	9448.96	9495.17	5295.74	5788.7	5422.67	5479.85	5929.03	6145.29	7911.98	6906.2	9228.06	11929.1	6188.41	8321.02	12070.2	6723.08	4884.14	4325.12	6064.89	5496.58	5094.61	10308.4	5847.68	10062.9	6092.77	7870.77	5690.62	6960.03	6446.22	6892.71	6880.38	5711.8	5966.32	6262.46	5848.88	9714.64	5934.6	7200.23	8400.32	7700.81	8201.74	7925.06
36	105.954	886.986	20339.9	26606.9	28528.4	27603.2	26557.2	27214.1	27175.6	277793	259248	239138	271171	246344	226705	273928	279480	248532	214154	229401	279588	325937	178634	127056	224147	208524	240641	225239	184515	237707	206293	236639	209751	23446.4	23944	23064.1	24788.7	22703.1	21959.6	23791.6	23436.9	23046.1	216093	24111.2	21214.9	23117.2	23210	22934	23344.3
37	106.956	36.9905	9839.74	9130.07	9645.6	9077.59	9270.94	10085	8666.75	16157.2	11109.8	11897.6	17241.3	10581.3	17364.2	17155.6	17989.6	10177.9	8723.73	16176.3	9106.78	6687.69	10575.7	11037	9992.05	18301.5	11235.7	11172.7	8688.9	14832.3	13960.1	9869.66	16648.9	9072.7	8284.77	10221	7071.01	7724.14	8745.99	8892.87	11372.9	7664.96	9978.73	8193.07	10552.5	8073.29	8649.77	7555.82	9585.3
38	107.074	360.62	18789.2	17273.9	16487.6	19479.1	17581.7	18083.9	17021.1	20934	20584.7	20453.8	20925.4	20552	18398.3	48306.2	20247.3	20893.9	18016.3	19856.1	20354.8	15657.8	18136.9	21887.5	19768.8	20577.8	20030.4	19215.8	20689.7	17331.2	24216.3	21721.1	22196.7	12406.5	11960.8	13083.1	12931.5	15020.2	13729	12113.8	10304	13119	21826.1	11409.4	11368.1	13553.7	14130.7	13352.4	12980.7
39	110.003	33.0429	37250.6	38023.6	37320.1	37197.3	38779.2	35937.1	38118.5	30610.1	35387.7	31861.5	31597	34522	43410.9	42655.2	53510.8	37953.2	129687	31830.3	59875.5	43346.3	35527.1	38724	38923.1	31234.2	38695.1	37212.7	41435.2	32380.1	36988.9	39335.1	36410.1	41742.2	42330.5	42124	38047.1	38310.5	28385.8	48687.8	31519.4	42215.5	50250.7	39205.9	45901.2	40198.6	40921.2	39140.2	30274.6
40	111.051	367.911	32542.6	32081.5	30550.9	31413.2	33536.9	32547.6	31489	6557.55	7135.48	7946.74	6575.08	7363.98	6309.48	20681.8	6767.04	7297.82	6255.53	5140.87	6333.75	5125.5	5361.09	5249.04	6722.06	6173.69	6259.75	6353.28	7087.38	5891.1	7379.26	6547.98	6139.02	2510.72	3832.67	2621.89	5035.94	3794.8	2842.81	3878.09	4338.47	3912.61	6604.35	3908.56	2592.33	4059.86	3385.79	3366.51	3691.36
41	112.012	33.8408	10977.2	11662.8	12583.5	10578.7	11923.3	11653.5	11610.6	7881.06	10150.6	9611.99	9579.89	8259.45	12957.2	13986.7	13186.6	10929.2	31686	8596.26	14436.1	10148.2	9506.24	10617.6	11864.9	8831.34	11404.7	10464.2	13670.7	9103.67	9720.64	10582.3	10480.6	11381.7	13524.4	13737.9	11182.8	11811	9344.84	14712.7	9664.06	14016.2	13417.2	10868.1	13986.1	11398.2	11303.1	11542.9	11247.5
42	113.024	56.714	38875.3	36976.2	40634.6	37850.6	37134.5	38879.9	39535	63765.9	70807.5	66291.2	68569.3	84428	57820.1	105452	83550.4	90952.4	136839	71323.5	146317	145494	58745.9	62160.7	84315.5	85704.8	65431.1	73741.4	195863	67597.9	129563	68532.1	50420.7	36626.9	38477.2	40079.1	35115.2	37200.1	38733.9	38646.2	35138	41752.2	130738	43348.3	40109	41005.5	44669.6	33509.7	39903.2
43	113.061	253.924	11672.2	15170.9	13218.4	14811.9	13264.6	13120.2	12750	40432.4	45009.4	40789.7	48372.4	46318.5	34133.5	64191.6	57113.5	62843.5	60526.2	51116.9	66631.2	66046.6	39610.2	37848.8	40427.2	33675.3	50325.9	35224.9	58566.6	51517.7	73741.7	42300.7	39452.4	7589.1	12274.7	9930.51	14185	9186.23	11676.4	9928.12	11693.4	10100.3	77159.7	10725.8	11823.5	10465.8	11946.9	7878.92	9613.17
44	114.082	221.896	40761.5	39882.9	41093.6	39008.1	41027.7	41550.7	44744.2	34475.2	42162.2	38183.5	38394.2	43252.9	34764.6	74671.2	47239.6	65833.6	73024.9	31077.6	164496	313313	34802.5	74024.4	54688.4	36356.9	47449	38560.8	96556.4	37695.9	133047	43381.7	35892.5	18317.3	52473.1	34236.1	20967.9	34431.7	23378.4	17546.2	19869.4	22819.1	104548	30090.5	59064.6	24644.8	23832.6	43514.2	96478.4
45	114.061	43.5223	126497	123157	124525	126189	130850	122565	127504	178976	209522	148600	201396	242668	185957	198654	332688	279936	320892	230114	341651	440324	167769	141630	205585	130304	231500	192474	385050	195669	383062	155830	199114	87170.6	136160	98996.7	108276	116644	141611	84556	86224.3	132504	341468	114474	143318	105576	105320	116685	102350
46	115.009	35.5209	26801	24089.3	25313.4	25036.4	26499.6	25589.8	25008.8	24529.9	30376.9	29872.3	26698.1	25771.6	35754.2	36329.1	44693.8	24346.5	71758.3	23687	48105.6	37741.2	26759.2	27441.4	32060.1	24242.3	27086.2	28197.3	39072.2	26669.9	51857.1	28205.8	30450.5	23955.1	26400.5	24745.1	24457.9	25239.5	22799.9	26766.9	20562.3	30100.9	41929.4	25153.6	27357.2	23715.9	25783.3	24690.1	24418.8
47	115.052	229.762	16675.9	16855.2	19155.3	16919.3	16747.9	17586.8	17615.3	16434.7	15104.4	14025	16216.4	14800.2	15016.1	21367.7	21497.2	29531.9	35344.1	18570.2	41101.1	55097.2	17355.2	16909.4	16171	13727.7	18150.6	20706.1	49762.9	14587.9	35178.8	13855.3	15169.1	15711	21359.5	16841.7	17910.5	17811.3	18638	15864.1	16163.5	14085.8	46066.6	15894.9	18221.6	16666.6	9467.94	15163.6	22370.9
48	115.04	339.496	28196.7	28708.8	28809.5	28214	28620.7	29393.6	29995.3	5575.41	5222.23	6779.88	5181.89	6269.38	5116.3	9322.99	4983.23	5409.5	5648.94	5435.6	5586.35	5069.03	5144.42	4125.29	4549.22	5896.59	4867.33	4544.43	5648.64	4715.19	5864.65	6636.95	4831.14	3992.5	4840.77	5297.6	4570.1	3813.41	5513.41	3788.75	4960.36	4752.41	6177.75	5118.65	4281.07	3709.65	4607.32	4138.75	4861.42
49	115.074	401.573	8725.83	7450.46	8747.11	9322.62	8641.5	7402.97	8085.39	8947.36	10180.1	8471.57	7634.94	9100.2	9118.19	24695.1	9294.7	9799.81	8986.86	8716.32	9066.45	8158.79	7606.37	8351.98	8052.95	8367.17	9835.5	8687.56	8849.61	6563.29	10625.7	10563.2	7884.07	6117.27	5935.57	3803.62	6202.95	5954.61	6034.96	4732.46	5727.84	5803.66	9909.08	5080.29	5050.79	5267.47	5123.48	5678.68	4709.52
50	116.07	43.3399	230484	227190	236060	232035	243055	234864	248996	403356	461290	385595	415173	449828	363892	475908	400743	476853	506563	625678	451612	675391	332102	379760	286383	273984	483994	438812	633473	271815	622344	429530	223187	154296	189190	258116	155921	137296	181242	202491	114740	136560	908347	217115	220712	136086	187842	210805	239456
51	117.044	238.25	24439.9	21576.3	20673.5	21238	22056.6	21409.8	23022.2	85019.5	91368.1	85510.9	89300.1	89655.9	82564.1	107751	100254	110914	196913	99144.5	200404	210965	87527.8	87854.1	97420.7	81746.4	90355.5	90658.9	215374	85708.2	197763	79166.3	89339.4	21228.7	25712.7	23245.5	22081.3	27109.9	23250.8	22180.4	21964.8	11492.9	196965	23185.6	23718.7	23477.3	10823.8	21195.5	22829.7
52	116.976	17.7164	25059.4	22463.8	23044.5	22958.1	22596.4	25871.3	24885.1	37874.1	35751.5	33800.1	35381.4	33394.2	33668.6	60961.1	35906.1	34118.9	73553.7	47281.2	35585.1	47575	31018.1	33452.1	32759.7	34937.7	71111.5	33611.3	47470.2	35185	48037.2	34685.9	35095.6	24273.5	24424.8	24594.4	28909	7787.4	32114.5	24941.3	26740.6	24775.7	60934.6	25418.3	25013.5	30805.1	23109.3	23867.1	23753.2
53	118.087	55.0151	1.61809e+06	1.63437e+06	1.64761e+06	1.67213e+06	1.6578e+06	1.6666e+06	1.67643e+06	2.72018e+06	3.24422e+06	3.2041e+06	3.02428e+06	2.77568e+06	2.56498e+06	4.12634e+06	4.16595e+06	3.77236e+06	6.15147e+06	3.18576e+06	6.76038e+06	7.99236e+06	2.90365e+06	2.49589e+06	2.55927e+06	2.41325e+06	3.56109e+06	3.1398e+06	8.35949e+06	3.03622e+06	6.07055e+06	3.2122e+06	2.78905e+06	1.35687e+06	1.57832e+06	1.56038e+06	1.50817e+06	1.31091e+06	1.71536e+06	1.41292e+06	1.33096e+06	1.50687e+06	7.90894e+06	1.58153e+06	1.53832e+06	1.33054e+06	1.33081e+06	1.29328e+06	1.4987e+06
54	118.066	238.643	65769.8	68044	69233	70165.5	68952.5	68311.1	70823.5	437814	426281	452500	434595	444055	424827	561561	493847	526606	1.0133e+06	477057	1.08137e+06	1.09003e+06	433235	443079	460555	403919	464266	444863	1.1208e+06	442645	1.08792e+06	396401	442407	67193.3	75702.5	62012.2	69941.1	69474.4	80882.9	68167.7	65307.3	61164.1	1.03223e+06	70672	65810.9	70540.3	56680.9	58932.7	73571.2
55	119.086	582.2	63048	68981.1	62449	63635.7	63294.6	65814.4	64467.2	90835.3	71868.9	80788.6	79573.4	80153.8	73950.8	103081	94153.3	105661	360678	82270.9	103835	85936.2	45019.3	73137.8	76242	77373.2	88459.9	76427.5	161758	66293.4	98388.9	65707.5	62349.5	78313.9	71168.9	21312.6	62792.8	93465.3	70935	76810.4	87222.6	87181.6	108908	86127.4	16835.9	73905.9	17135.6	84052.9	59912.3
56	119.073	238.325	12995.2	12045.1	11906.1	11666.5	12599	13158.2	13203.9	469861	449466	486532	451927	453893	445101	580598	498695	512398	1.05511e+06	490894	1.14376e+06	1.14392e+06	429238	460301	472299	429738	482221	440338	1.15584e+06	451488	1.18114e+06	415810	452595	12397.6	12364.1	13180.3	15849.3	17863.4	15496.7	14503.7	11870.2	12178.4	1.034e+06	12616.9	14725.7	17704.6	12960	13804.9	12869.1
57	119.082	58.9243	116194	121600	124267	122170	124411	123557	127109	201759	237094	256363	218700	209297	186718	322197	302652	270403	442135	242337	410571	478106	215126	181236	192783	190674	261346	235694	493549	229015	374566	236353	201545	99534.6	122659	123410	107710	97844.5	124670	94804	93940.5	105237	575964	123758	117714	93960.9	96266.1	92342.9	115098
58	120.005	38.5755	12254.9	10490.7	12412.7	8604.86	11309.2	11902.7	10891.4	20557.9	16494.2	24125.6	13217.1	21973.1	16099.4	20378.3	18556.6	20846.9	22931.7	24510.9	25179.3	18510.4	14664.7	14083.2	19556.1	15809.7	16729.6	22746.5	21101.4	12881.2	18985.7	16729.9	15274.7	11573.1	11197.8	12013.6	11078	7638.74	8606.06	15672.2	9523.79	10444.3	23595.5	11725.6	12343.1	10635.8	14381.6	11096	11766.6
59	120.081	128.771	1.37843e+06	1.37918e+06	1.39344e+06	1.41653e+06	1.40362e+06	1.42463e+06	1.40164e+06	2.02288e+06	2.43456e+06	2.03382e+06	1.85096e+06	2.18512e+06	1.55859e+06	3.32078e+06	2.53753e+06	3.14751e+06	4.743e+06	2.52408e+06	5.84276e+06	4.97786e+06	2.10635e+06	1.7732e+06	2.17099e+06	1.69454e+06	2.52929e+06	2.09108e+06	6.50195e+06	1.96739e+06	5.92084e+06	2.13341e+06	2.09442e+06	1.22766e+06	1.54994e+06	1.47695e+06	1.1671e+06	1.13725e+06	1.25926e+06	1.28785e+06	1.17066e+06	1.2642e+06	5.71444e+06	1.40392e+06	1.18351e+06	1.70619e+06	1.03584e+06	1.29759e+06	1.32731e+06
60	121.051	16.5515	13530.1	1.27922e+06	0	0	15219.4	13003	0	1.58826e+06	1.44267e+06	1.42307e+06	1.4721e+06	1.41868e+06	1.39141e+06	1.69088e+06	1.54157e+06	1.50743e+06	1.52865e+06	1.3883e+06	1.66978e+06	1.46148e+06	1.24988e+06	1.31396e+06	1.29032e+06	1.30999e+06	1.33096e+06	1.34538e+06	1.46715e+06	1.32254e+06	1.36516e+06	1.52119e+06	1.24642e+06	15382.9	0	14458.4	0	1.30414e+06	24273	14204.2	1.35817e+06	0	1.64693e+06	13816.4	1.36746e+06	1.364e+06	0	1.38226e+06	15569.6
61	122.054	16.4035	0	0	0	0	0	87011.8	0	106243	94122.6	99778.9	91901.5	93823.5	96936	107527	107005	98980.7	105947	96482.4	111035	98808.2	86924.4	87012.4	84407.6	85346.4	84160.3	92791.4	97860.2	88947.9	87561.5	106486	81458.6	83382.7	0	0	0	0	0	0	90605.1	0	108836	0	0	0	0	0	0
62	123.031	67.6979	72443.1	71266.2	75952.8	77709.7	72270.8	74000.8	79210.3	136887	145000	181543	146771	134064	118180	199016	152244	195663	270653	168194	325970	302177	122197	114867	122847	122174	149458	150097	376776	118849	322388	150707	113203	71155.3	77543.5	83782	59547.7	66625.9	71935	71549.6	68807.1	56053.8	437841	86430.4	70207.6	71731.2	59129.7	74887.6	86849.9
63	122.964	19.6988	86473.2	84934.5	91164.6	85605.2	90099.5	93929.1	90418.3	89801.9	82027.8	72343.1	77298.5	83311.2	80599	56154.6	83464.9	75204.2	72095.4	74616.8	76636.3	66162.3	73625.1	76144.4	71810.5	77388.8	69131.5	75340.4	65455.1	73157.5	64549.5	81949.7	70611.5	90486.4	90275	89540	88673	88894.8	92428.4	89656.2	87693.7	96555.3	69602.8	90058.4	92267.2	96426.4	93863.2	93464.7	94391.3
64	123.069	255.718	50015.5	48149.4	51578.7	47919.7	49311.1	46844.1	49515.6	53129.3	47800.4	47219.3	47587.1	44769.7	45733.1	40668.2	42022.5	41218.3	41089.1	41407.1	53250.4	36698.4	42991.5	41057.4	40789.8	41011.9	42533.1	41146.8	36084.4	41994.4	39711.5	50410.2	37843	15666.2	14142.2	16730.7	16037.5	15326	17141.4	15475.4	15311.3	16510	44282.9	15663.1	16343.8	15080.4	16488.1	15418.8	15175.4
65	123.08	313.345	77919.7	71980.5	72709.1	74200.2	73732.4	73990.7	72635.7	54547.1	43041.7	43003.7	41316.1	43792.2	42917.4	35607	36935.7	36250.9	35951.1	35984.2	47945.9	32793.2	36497.5	34329	34783.3	33781	34303.8	35884.8	31588.4	32037.7	32241.1	49473	33828.9	17768.5	17103.4	16717.3	17097.2	17191.9	17221.7	16730.8	16931.7	15604.4	45337.3	17991.9	17724.3	16147.9	17328.1	16321.9	16637.6
66	123.075	365.345	34863.7	36778	35710.9	36716.6	36897.9	38160.8	36063.9	37313.1	27916.8	29988.8	29549.7	29458.1	27825.8	27452.7	26639	26524.6	25631.3	26629.7	31036	22188.1	23641.5	22349.5	24748.4	24814	23681.4	23130.3	24269.9	23771	22692.1	32398.4	21583.1	13511.4	14916.9	14099	13156.3	13739.3	15286.8	13370.9	14305.7	15063.8	29465.7	12967.9	13795.5	14415.9	13867	13493.9	14651.7
67	124.044	66.2623	6862.71	6753.49	6396.34	6263.33	7070.02	5835.63	5562.54	8882.58	12860.4	16336.3	12000.5	12164.1	12538.2	15413.5	13058.4	13145.6	24411.3	15272	27096	26460.8	9500.79	9237.45	12239.6	12790.8	8911.02	13201.2	29795.3	12276.6	28032.5	10923.8	9782.5	6279.87	6968.03	7104.22	5696.8	7330.64	6366.17	5585.83	5768.45	8758.25	35051.9	7803.12	7094.95	6967.67	6126.3	6900.94	7506.55
68	124.063	126.091	18558.2	18317.1	20774.5	19123.5	17435.3	18716.9	19294.8	7239.97	6946.07	5963.54	6401.94	5481.11	5630.18	6134.55	7478.93	6163.61	6470.66	5870.46	5834.29	5458.83	6277.47	5345.02	5858.45	6265.7	6521.52	5813.75	5097.75	5063.35	4695.99	5855.31	6134.41	3746.06	2406.06	3616.07	3434.54	3103.04	3284.15	3605.44	4072.22	3956.75	5693.83	3506.09	2703.62	3967.83	3623.72	3618.03	3438.83
69	125.079	404.103	66260.1	70329.7	61658	66882.5	64920.8	65389.3	67159.7	6579.31	4800.38	6078.28	6031.52	7043.05	5062.16	7019.88	6839.76	6541.86	5309.02	4598.16	7019.16	6302.56	4766.68	5418.99	4632.95	4268.49	6975.13	4584.49	5606.33	4110.84	7311.05	5701.24	4814.47	19835.5	18345.7	18340.8	18613.4	21218.4	20710.4	20664.7	20855.9	19050.9	7075.66	19345.2	20486.6	20369	20816.6	22588.5	21183.6
70	125.088	468.303	105188	107881	109111	106538	108284	109898	107341	5623.31	4688.08	5397.45	5307.25	5551.93	5715.09	8717.95	5537.01	5398.08	5283.99	5054.9	5275.84	5145.55	4454.55	4747.83	4488.37	3966.47	3789.41	4382.49	6364.27	4866.32	4720.27	5676.47	4407.49	37946.2	34901.2	33944.5	36905.6	35040.1	34209.8	38022.5	36816.3	36890.1	5852.74	36620.8	34328.6	33181.4	37801.3	39872.8	39136.4
71	125.093	365.53	108253	109708	107059	105412	108328	104130	109278	6769.27	8045.42	7325.46	5162.02	7082.8	6607.05	10502.7	6014.95	5011.93	6220.22	5372.26	7030.29	4929.41	5889.04	5331.43	5093.04	5182.75	6332.92	4890.21	8544.7	5058.69	6083.7	7323.99	4696.98	17249.8	16579.2	16721	17740.7	17428.6	16303.8	15902.4	16882.4	16345.8	6010.23	16667.2	17114	15333.9	17791.1	16420	17175
72	126.086	199.308	8769.29	9560.11	9227.37	9518.02	8615.51	8916.4	10788.9	11693.9	14131.4	10951.6	15650.7	17804.9	13831.6	27368.9	17898.9	29932.6	22517.1	18316.9	38004.7	54494	10232.6	14752.2	13350.8	16759.1	18629	11292.7	29739.2	16627.4	29894.8	29498.7	15188.5	11487.5	6643.75	6733.61	3482.33	11267.9	7322.37	6507.31	7248.08	7893.25	49190.1	8029.05	4739.66	9517.3	7668.79	7352.65	5010.84
73	126.096	468.798	7160.67	9781.53	7897.87	7749.99	7411.67	8548.79	8261.38	1444.16	883.471	2155.45	1032.95	2247.32	2261.62	2726.09	2451.53	2508.95	1865.04	1903.84	1424.16	2585.87	2629.88	1508.08	2960.25	2179.41	2837.33	2667.58	2529.92	3240.02	2024.05	1972.68	2260.22	549.705	589.412	480.35	484.014	374.509	1334.28	387.486	997.973	965.85	1553.31	934.57	772.654	253.652	543.054	352.857	1225.75
74	126.095	365.722	10495.4	9677.36	10397.4	9578.63	10717.6	9768.34	10287.9	2434.35	2687.17	2769.22	3142.91	2446.46	3726.66	5252.07	3620.71	3324.6	3312.94	3297.98	1631.66	2383.96	3224.44	4010.36	3511.89	3913.48	4041.7	3215.63	3685.38	2683.87	3333.08	3069.4	3589.71	1403.17	1820.36	1091.08	981.162	1546.13	1492.31	1112.64	800.079	1813.71	1473.88	770.37	1378.7	995.842	2098.6	1725.98	1682.82
75	126.972	16.7874	42119.7	42617.5	42506.6	44999.1	45780.2	45427.1	49316	14808.5	16852	17143.7	17743.6	15723.4	16764.6	35917.7	35336.6	32930	40326	31266.9	15435.2	26840.1	32152.1	28762	30397.8	29953	26472.7	29727.6	25617.1	27998.4	28839.6	15157.8	29185	45931.4	49520.7	45089.1	45159.2	45037.5	46333.9	40712.8	46938.8	41339.8	16674.5	47000.4	49665.3	45009.4	41397.3	46441.3	47238.9
76	127.07	123.269	134433	130569	134569	133247	131732	134528	134385	10705.7	11538.2	13090.3	11293.3	10421.1	13689.8	25526.6	11984.3	11572.2	20420	11929.1	9785.33	154203	25036.9	23923.1	23261.5	19892.9	10790.7	24652.4	15068	20354.1	21331.1	11919.8	23667.8	27424	26303.7	28137	29766.3	29695.8	26249.5	26477.7	27513.1	29240.4	10343.6	27426.5	29212.7	25982.6	28809.1	28897.8	29655.3
77	129.059	367.558	44375.6	43360.1	46104.9	44718.5	45799.5	44883.1	44523.5	66878.6	63246.1	62492.9	62814.1	57741.9	61978.4	83095.4	65496.2	63432	49736.6	59274	47865.6	38400.1	57117.4	60267.9	58655.5	62171.3	58142.4	58087.5	46547.8	54981.1	43054.7	59140.2	60032	17561.7	16995.7	17726.9	16908.5	17019.3	17883.9	17740.7	16703.8	16330.1	47419.2	17501	17481.7	26647.8	17119.9	19359	20215.6
78	129.054	43.7555	27101.4	27306.8	27312.2	28993.7	28920.7	30363.3	29741.1	17546.7	44532.7	31971.4	51148	29928.4	38385.2	22345.7	83479.9	72487.5	86398.6	47892.2	108878	134596	14707	34527.8	38124.9	18327.7	49927.5	56699.9	124869	53205.7	88957.2	23668.8	49422	24585.5	20037.3	22257.4	24696	20031.3	29066.8	22571.6	20827.1	31542.3	103176	20317.1	33474.7	20063.1	23167.4	32257	21572.8
79	130.054	59.8398	235109	239761	244483	239298	240930	245296	246097	528506	877672	910128	636292	900748	789345	1.01299e+06	731496	992323	1.89489e+06	743093	2.54048e+06	2.59165e+06	617193	869165	618276	667442	953850	731049	3.23969e+06	597316	2.99337e+06	601851	518989	230952	279049	220893	216030	196470	208441	228935	185818	246066	5.56583e+06	238095	308253	276836	254192	263902	238195
80	130.159	267.362	49439.5	55462.7	69998.1	55775.4	59290.5	63261.7	74274.9	79270.5	185824	80860.4	78807.7	75011.3	79548.4	243986	87710.7	186679	122524	83934.6	116327	122058	74887.9	80594.2	170120	74193.3	78902.5	75066.1	130568	80165.1	120652	85440.7	79402.8	65965.9	76993.2	104283	56230.2	54112.8	50275.5	48453.5	52501.3	54266.8	120715	56037.1	92155.6	64161.2	133392	55022.2	71686.4
81	130.159	887.038	59932.8	65128.1	71986.9	73632.3	72107.1	73780.2	73099.2	170781	168529	143924	160350	147088	134840	192441	174448	175085	133409	120006	147068	166965	93363.1	60270.6	117940	130578	129196	131283	117058	142934	118422	138223	126687	63045.9	63449.5	60719.9	62841.2	62383.4	63090	60893.7	63397.6	62321.4	123416	63603.7	63314.6	61930.1	62457.5	65814.2	67218.4
82	131.044	128.771	73108.2	68236.2	73148.4	70774.6	75620.3	71282.2	75589	107935	120587	106896	95563	111008	82137	157729	120748	150346	216336	117860	271499	224141	103476	85229	104624	85687.5	120545	95560.2	278269	96859.5	262752	109592	98069.4	61768.6	77299	72741.7	59656.4	61720.1	64205.1	65914.1	57497.3	61728.1	267099	69861.5	61447.5	87068.2	53253.4	61317.2	64529.3
83	131.057	60.0253	19847.4	16300.9	16930.9	14684.2	18837.2	18851.3	15184.2	33482.6	56126.5	61312.3	39743.4	59896.2	54578.1	89293.7	75258.3	64071.2	134178	46318.3	172504	167966	59322.5	54418.2	61429	46052.3	60383.7	50358.4	212259	39167.2	187509	36152.5	53873.1	15103.8	20599.6	14243.3	14468.1	13511.7	12868	19709.1	13168	15359.6	370678	14553.7	20498.4	17349.1	19197.3	19601.4	14064.3
84	132.104	74.3426	6.51539e+06	6.56154e+06	6.60851e+06	6.74728e+06	6.68341e+06	6.66116e+06	6.75057e+06	9.54494e+06	1.04214e+07	9.87217e+06	1.00159e+07	1.03707e+07	7.22416e+06	1.52384e+07	14478537	1.74884e+07	1.87665e+07	1.13418e+07	2.13174e+07	2.46095e+07	9.85213e+06	8.41241e+06	8.88203e+06	5.91162e+06	1.38827e+07	1.19267e+07	2.75648e+07	1.09096e+07	1.86302e+07	1.04642e+07	8.37105e+06	4.99063e+06	7.04457e+06	6.2888e+06	7.05088e+06	5.34284e+06	7.6415e+06	6.40856e+06	5.70988e+06	6.934e+06	2.39773e+07	6.27911e+06	6.18534e+06	6.25149e+06	5.29826e+06	5.0842e+06	6.05765e+06
85	133.103	73.9232	454149	461408	455021	467472	456487	464258	474643	673463	726045	683438	704203	729623	506528	1.03508e+06	999147	1.1861e+06	1.24674e+06	806272	1.41067e+06	1.62305e+06	690194	592865	627407	422799	979065	842362	1.83028e+06	757105	1.24339e+06	727647	584248	363266	503598	451008	497471	378896	536105	451287	396222	469243	1.59199e+06	434711	421750	439561	372730	372599	422271
86	134	41.9485	25670.9	26413.3	28331.3	28596.2	28094	27674.1	28728.8	27232.8	31030.2	32698.7	27835.6	31811.5	25590.8	33051.3	33750.1	31073.5	42057.5	30553.4	44448.2	47988.8	26985.5	24667.7	25168.3	26094	30383.6	30865.9	49298.6	24641.4	49170	30890.2	24171.2	27582	29820.1	28702.1	21738.9	22477.4	26225.7	27513.9	20389.8	24372.7	46659.4	27329.6	28096.3	23930.9	26972.1	24070.4	29886.5
87	134.105	74.6301	38720.6	38396.4	40146	38906.7	39874.4	39735.5	39332.7	58332.7	61967.2	57386	62188.6	62505.3	43184.8	88285.2	86206.1	98965	108037	64430.2	122708	140714	58148.7	51105.4	53505.1	35549.7	82289.2	65713.5	157645	62916.6	110983	63536.3	50878.1	29635.1	42269.4	39076.6	44981.5	31679.9	46967.1	39569	33125.2	41046.3	141250	37104.7	36801.4	39667.9	31589.3	30768.1	37863.5
88	135.004	49.0591	43793.5	45340.5	45429.2	47591	47590.9	44174.6	43294.2	36872.8	47600	37478.2	45341	51969.8	38475.5	54989	53590.6	57502.8	67059.1	48476	53368.6	46776.6	40411.2	42458.6	49892.9	51450.3	41644.2	46639.1	48264.1	44814.8	38582.4	46601.2	36398.6	36068.5	41128.8	43347.9	37594.6	37551.9	38356.1	35721.4	34147.5	39076.5	48067.4	37978.2	36942.2	41437.8	41581.5	36811.3	36977.1
89	135.075	582.15	24962.7	23947	25736.5	25515.6	25503.1	25525	26098.8	32215.7	25233.1	28143.5	26192.5	26167.1	25992.7	36921.7	28099.7	29704.4	91403.8	23975.7	36447.8	25692.5	9075.63	22550.4	22872.6	28569.2	30634.5	26607.6	43884	21972	33780.3	23126.4	21315.2	28941.3	28444.3	7870.59	23023.3	34303.7	27412.5	28900.1	31393.9	35076.2	33448.8	29705.5	7482.25	27887.6	8260.15	30846.6	23300.2
90	135.077	365.614	14052.5	12913.8	12608.8	13954.2	13625.6	13279.2	12398	6664.81	6922.19	6920.19	7220.91	7810.72	6118.39	8671.82	8064.23	7725.28	6784.07	7359.02	6965.37	6398.06	7012.61	7100.74	6190.22	7470.66	7130.52	7346.87	7217.82	7275.27	8365.23	6451.87	7880.44	3875.26	3080.14	3759.12	2793.2	3206.46	3456.35	3340.43	2903.08	3407.01	6208.33	4141.53	2820.43	3139.46	3738.76	4411.38	2823.19
91	136.075	66.4965	145189	144135	151570	151762	154502	151780	154141	244226	278044	393664	269915	256188	220471	456951	334605	417519	648930	354792	744024	728529	232330	211349	242623	244071	319558	267996	903089	270829	777615	283090	214398	133378	148905	173927	104181	134396	136853	138355	127708	108204	1.07181e+06	169786	135409	149942	105395	138571	173444
92	137.049	61.0631	134983	140764	145067	141942	144885	144872	146067	257040	307381	229567	214652	289360	384312	387743	310339	285087	590389	235890	1.22176e+06	649780	221857	260538	302791	359058	337635	234623	682279	248176	1.26724e+06	231240	214016	88746.3	105784	167814	142410	123756	146521	138291	108409	140206	581615	219947	79835	138437	121421	113491	111263
93	137.02	238.478	13169.7	3224.23	2714.06	2772.33	3917.53	3780.38	3685.39	70142.7	63880.3	95059.1	62178.3	62879.9	65819.6	86071.8	74432.8	75538.4	151184	72941.9	167124	160983	64189	65808.8	67505.2	60728.4	70135.7	62259.4	163235	64795.4	169128	60529.4	65287.4	2200.01	2302.6	2599.4	1832.83	3432.85	2128.53	2855.82	2518.62	2322.97	146083	1752.71	2235.33	2854.76	2024.6	2473.68	2536.95
94	137.069	290.121	11296.3	12200.2	12387.2	12014.8	12913.3	11518	13615	3057.02	3137.08	3966.89	4312.82	3935.06	3733.57	7366.31	3709.27	4878.98	22881.1	4258.06	4471.88	5249.76	3554.62	3151.72	4293.19	3670.52	3429.07	3920.6	16098.7	3771.91	15400.3	3058.65	3015.54	1479.44	923.748	1612.29	1249.34	1885.09	1777.79	1690.81	1149.39	1795.95	24578.4	704.586	964.908	1892.86	1167.96	2498.37	874.162
95	138.049	44.4068	26907.2	31450.1	27496.7	28798.7	26416.5	30752.5	29229.7	42921.3	48822	37508.7	40537	48750.7	50556.9	60258.5	50886.1	51769.4	77484.3	52686.8	56558.2	133185	40222.8	46334.4	20428.7	47082.4	54281.3	46762.3	102378	43769.5	136400	44456.1	14128.8	21818.4	27024.9	37996.4	25905.7	23290.5	27092.3	31174.4	32101.9	22320.5	123454	32902.2	20940.1	28055.2	26495.9	27212.7	28006.3
96	138.909	41.1076	40947.7	39920.6	40777	37620.3	41817.9	38204.7	41495.7	56489.8	55554.9	56312.4	57018.3	60377.5	53192.1	69388.3	57560.2	59811.3	115239	54291.6	121498	103989	51389.4	57907.8	59616.2	46404.3	51645.3	54845	110116	51552.9	112321	51997.7	43529.2	40150	38171	41378.8	39037.1	39521.8	38839.7	37309.7	37941.6	39822.8	106706	37364.8	34998.6	45043.1	38769	36091.5	35207.4
97	139.036	237.355	6022.73	6759.2	5320.95	7051.53	6170.84	6641.31	5403.11	25833.8	24571.6	25737.9	25248.8	25632.8	23589.6	29109.6	27010.1	28321.4	48846	25498.4	53925.1	52874.9	23047.9	23034.6	26968.1	23055.7	25378.6	24888.8	52758.1	23786.9	59238.6	23778.6	24077	3449.69	2292.17	2649.49	3021.36	2481.48	2156.63	3461.95	2791.04	3429.76	44858.9	2423.96	2998.09	2801.87	2489.57	2162.25	2398.76
98	139.105	393.846	33918.3	38675.1	34705.6	29188.2	32330.4	32942.6	30361.3	8885.11	8948.78	11975.6	8170.64	8518.24	8380.12	16880.4	9380.9	8546.05	9041.89	7853.39	8253.11	8628.26	6986.15	8381.74	7501.52	8021.64	8543.34	7715.7	9284.49	8958.71	9094.8	8195.66	8485.58	6024.16	5945.6	5457.03	4911.33	5536.29	5908.75	5997.72	4551.45	5064.92	7633	5286.06	6012.31	6285.94	5599.02	6420.03	5506.15
99	140.063	41.1365	117938	123747	126644	121551	125433	129407	124434	94702.6	122014	123093	135475	99037	135009	148127	156154	113764	380393	116043	357710	423080	110502	91989.2	88872.6	109510	142015	109913	369049	105235	297880	136079	145127	107369	108127	136592	102029	101126	120400	86030.9	97707.6	110425	386849	115634	110767	93014.3	113471	110816	104499
100	140.945	41.9215	33669.1	35565.3	33534.1	33349.6	32539.2	34151	33594.9	62496.9	61281.4	62747.5	61461.6	67846.7	54354.2	68183.4	67397.7	66466.7	94875.2	53103.8	110306	109976	37370.4	38683.5	59516	43623.1	55272.4	51475.9	103976	57425.6	98788.2	58174.1	45467.6	34221.5	33710.4	35244.5	31180.1	32461	40868.8	31856.4	33352.1	34890.5	102037	30855.4	30841.1	39967.4	30463.1	31255.7	32018.5
101	141.013	238.524	30944.8	31948.9	30779	30298.2	30381.7	30191.8	31910.9	159341	147783	155209	146437	148618	153907	189604	162907	162649	332694	156605	373505	353518	138225	150691	149742	137865	153179	140285	354243	145760	370163	137488	144924	30222.5	28586.4	28951.3	28273.7	30249.7	30582.3	27830.9	28876.6	30164.2	327509	31764.1	26911.1	29402.3	28093.2	27942	29513.6
102	141.959	22.909	320987	332088	346004	331792	326843	334879	350153	198591	191343	195128	184994	187011	186325	108549	191299	184748	179196	189288	190776	183214	173714	168922	173181	169089	164568	171121	174539	164891	170533	192312	156379	334810	327806	331274	315882	321312	332896	324430	330451	336909	191382	330326	340174	339263	345832	340089	336528
103	142.068	240.247	16894.3	16446	16406.3	17225.9	15892.3	16291.3	18151.3	15809.1	22763.4	14064.8	21436.1	21727.3	13231.5	27135.9	28597.5	37891.4	90891.5	25855.5	107793	99273.1	24275.4	19158.2	25916.6	14843.6	22904.9	23653.9	113563	22802.6	87960.2	16998.4	18757.7	18013	20566.2	19150	17986	19794.8	20053.3	15450	20028.1	13933.7	123653	17634.1	18526.4	20611	12823.9	15057.4	19598.7
104	143.05	238.766	53042.9	51149.5	55333.2	52922.1	50901	53920.6	52576.9	85374	89352.3	81632.6	90651.2	89516.8	77999.9	112273	105632	129320	201037	101562	217373	226172	90258.5	84596.7	97390.9	74800.4	94072.8	94123	252426	90851.3	199811	77885.3	88790.6	53542.4	60301.5	51938.9	54671.8	51742.5	63194.2	51214	55717	46050.2	243498	52853.5	56095.8	58577.2	42339.7	47038.3	62485.1
105	143.074	404.251	27389.7	24871.3	26124.5	25760.8	25903.8	27573.6	27148.5	24429.2	23084.1	23415.1	24088.7	25867.2	25748.8	141650	27572.6	26185.5	23205	23454.1	24204.3	22161.2	22865.6	22779.5	23797.9	24833.8	27096.6	21192.7	21328	21618.2	25487.9	24927.8	24605.5	20647.4	19169	19599.4	19982.4	19161.9	21107.3	20976	19868.3	18750	25881.7	18228	19354.3	19365.1	20025.4	19934.3	20350.7
106	143.094	469.01	18754.8	18092.4	19973.1	19627	19449.9	19978.7	21296.3	24315.9	21499.8	24211.3	22827.6	19161.6	20713.2	20089.8	20101.6	17939.1	14674.9	18274.8	16224.1	12350.9	18394.4	18526.4	17323.4	20735.9	18738.6	18076.7	12419.4	16460.5	13634.5	24465.4	20267	18601.1	16954.3	17591.9	18059.7	16690.6	17064.1	15942.7	18134.4	18319.1	16530.3	17955.1	17493.3	17078.7	17991.3	18412.8	17440.3
107	143.087	326.752	14116.5	14980.3	15658.1	14289.5	14290	14444.1	15751.7	13052.4	11238.3	11095.5	12894.6	22899.9	11775	18746.9	12474.5	13974.7	26263.3	14063.4	17153.8	40166.1	11400.6	12301.6	13318.5	11132.2	12565.6	11189.2	39865.6	10230.4	48035.7	12148.5	11088.5	4948.39	4787.99	5596.14	6362.55	6276.05	5579.7	5587.53	4998.91	6398	37613.1	6741.25	6016.91	6288.47	5645.2	6805.76	6301.99
108	143.103	365.313	20236.3	20933.4	21375.3	22590.7	20966.8	20759.5	24299.2	18012.1	16399.5	16297.4	16051.3	18096.8	15536.1	33568.8	15834.7	16842.3	11324.5	17624.6	13852.2	10433	17205.6	15436.9	14228.9	16457.3	13130.7	13930.1	11419.2	15673	11440.2	18200.8	14565.1	18676.2	16560.6	16920	17033.7	17996.3	18417.8	16356.9	17771.2	16063	14655.8	15350	17355.6	16203	15951.4	17250	16036.9
109	144.096	43.5299	165478	167961	172702	176125	175471	169037	172827	36475.9	412959	264015	49620.2	333709	179881	917354	132769	255220	748073	87201.1	865439	784676	72482.1	305995	327313	131187	81881.2	283104	525278	258610	426661	59009.9	338706	35446.9	80524.6	90537.7	232340	153921	174638	534682	426894	144166	651498	84758.7	36731.3	519792	465372	264051	60417.8
110	144.08	240.686	63209.7	63566.3	63785	68037.6	65611.4	64762.8	66904.6	80391.8	99541.6	63689.8	91897.3	96719.9	65278.7	123159	124374	173422	210581	102094	239493	245408	93474.3	80648.3	101392	63433.5	93645.9	112065	290953	91356.3	178685	68506.5	86269.4	65801.2	76027.4	59543.2	64474.1	61789.3	73130.7	59446.6	67402	47691.4	305984	64915.1	64310.6	67991.6	44505.4	53241.2	72190
111	144.982	886.737	57626.7	59834.3	65728.3	64931.3	67700.9	66557.7	72398.5	569196	542830	580376	590733	553225	542501	693530	640304	607753	495844	503308	560890	288951	366611	273321	504879	485850	503920	502645	444619	499103	439803	544045	447173	54579.6	56953.2	53297.1	50812	52830.1	53130.8	53464.7	59092.3	52072.7	521538	52551.4	54603.1	50779.2	54523.8	55723.2	55342.3
112	145.08	44.6195	22083.2	26439	25058.5	15374.9	26116.2	26157.3	24695.8	7746.47	38101	23572.3	7733.16	34354.8	17534	76030.5	18031.6	27081.2	64057	13313.9	68969.3	66896.2	13625.8	30755.6	32401.2	17608.9	13763.3	25433.3	52762.7	27484.3	40186	8303.24	27473.8	5471.46	9713.55	8302.68	25295.4	22128.3	15126.2	48429.6	44073.4	15374.6	54845.5	8108.79	8115.61	47384.3	44061.9	29708	22292.3
113	145.082	231.907	7002.88	6924.58	8972.49	9674.27	8688.39	7844.2	8182.16	9053.73	11081.7	9716.79	9567.59	11919.2	7830.17	17718.3	14140.1	17860.1	22468	13721.8	22440.5	26555.7	15654.8	12881.2	14546.5	11767.6	13625.9	16396.5	33455	14629.8	23879.3	7941.66	14000	7363.98	9408.86	8231.89	8337.98	7208.17	8240.45	6727.74	8088.1	5863.62	32075.8	8350.05	7664.97	7351.76	4429.72	7268.13	8461.9
114	146.115	42.8212	53000.7	54895.1	56254.1	52473.7	53374.5	53653.4	60415.1	63315.1	71797.6	68108.7	77256.3	83234.3	84165	93132.4	125105	146106	141782	123048	119692	238598	76734.3	64779.6	64871.8	71942.7	109888	67590.9	129465	73971.4	117363	75703.3	80126.1	38288.9	58855.1	39676.8	51270.6	43053	53066	50839.2	36138.7	41603.8	148404	57799.2	55763.4	44337.8	41651.6	47938.1	46460.8
115	146.06	240.65	99509.5	106189	102486	106995	107663	107940	106664	140630	180647	117243	167867	178418	111388	222698	226835	320079	394120	192739	431921	448941	174493	147673	183271	121146	168054	198791	543970	170810	329129	126016	156957	106526	135417	99819.6	108586	101962	133412	101963	111340	81716.9	572233	109888	110753	114697	74115.6	89978.1	124098
116	146.98	886.731	25507.3	27878.4	28213	29141.9	32529.6	30900.1	31487	249781	251926	236352	267842	252794	257738	293599	288149	253041	214986	218357	232624	317708	174063	122529	218086	197606	232478	220766	192094	235999	203418	251734	199131	22828.4	22962.5	23667.9	24494.7	23224.5	23042.9	25041.1	24543.5	22978.1	299870	23221.9	24842.1	24722.2	25169.4	27423.6	24537.7
117	147.09	38.7753	159350	161103	163517	155526	162045	157774	164727	196170	242635	254773	219345	247311	190795	323648	263204	276336	325665	227851	251832	311357	186010	203155	179120	218524	302577	234395	326033	217221	292218	224826	189810	148297	167731	151305	149591	115816	162577	155230	140117	147679	318332	145802	187694	138233	150738	153022	161512
118	148.054	57.3647	65128.5	63399.9	67866.2	69667	69480.5	67635.6	73146.7	86151	87507.6	90141.3	103788	88828.6	87643.6	130051	110836	120493	257607	94111.8	182207	324314	70289	110429	78335.2	115471	103322	110889	230144	89439	181118	101966	108197	79215.7	60565.3	60416.6	51935.8	48998.8	66289.9	55988.6	50164.9	59868.9	235340	64515.4	55725.9	55887.3	50646.9	75943.3	81499.5
119	148.936	38.4318	9390.49	9069.48	9084.71	8202.49	9912.84	8926.3	10281.1	20454.8	21171.8	19243.3	21318.3	20061.8	18969.6	24904.2	21659	21953.9	40568.7	21979.1	37994.1	36290.7	16828.5	16256	17689	16412.7	18366.3	18081.7	33336.4	17299.6	33668.9	16570.3	15052	9272.96	8040.82	9584.84	7299.16	8743.48	10171.4	8713.27	8107.82	10405.6	34859.4	8611.13	8567.8	11411.3	8472.35	8117.2	8575.28
120	149.053	128.771	40772.8	38275.5	42166.7	40426.7	40706.5	42094.3	41682.4	55327.7	69226	54319.8	55149.9	57296.5	47343.1	88028.6	67511.5	84457.5	121344	67807.5	144031	128396	59370.4	52595.9	56686.3	47262	64971.6	59076.3	159633	51614.2	145290	58240.9	55829.8	36781.6	46846.8	42357.2	35308.6	34663.2	39012.1	35771.8	37548.1	37933	146762	41127.1	37954.7	47436.3	32540	37886.4	38489.9
121	149.024	314.949	34328.7	34540	36177.7	33810.6	33435.8	34222.2	36007.6	52835.7	51837.5	49110.8	44738	43661.1	51767.4	142868	50565.2	41423.6	52138.8	41749.7	55456	53045.1	50686.4	38150.4	43231.2	54191	45976.1	52621.4	71717.3	46639.7	55432.6	54029.4	47587.4	36509.4	36400.9	35691.9	37425.6	35398.5	35255.7	34514.3	35302.1	36499.5	52391.7	35730.3	35475.8	36957	35136.9	33627.2	35622.1
122	149.024	708.822	137278	136308	150325	149307	149004	148607	150957	256976	246660	233829	218967	224331	222498	986121	296563	262102	291888	170544	254844	159854	100865	187068	180340	186466	228282	218175	224590	175643	204553	231031	176219	116997	111834	128329	121050	125376	113124	121777	127621	125224	226892	121163	123238	129343	131662	125066	124911
123	150.059	59.738	237003	241909	242971	240905	244690	244965	249178	369326	455563	457142	438469	428716	380453	664187	607537	591135	1.27069e+06	559416	1.16734e+06	1.23125e+06	406400	361807	399192	331868	545956	505773	1.90952e+06	351820	1.2132e+06	387973	327419	227997	278600	276314	238138	224981	276181	264541	197633	186717	1.65167e+06	248053	261561	251620	198117	252908	252289
124	150.027	708.781	11710.5	12646.3	12283.7	11689.1	11909.6	11943.2	12626.2	23903.5	20726.8	19866.5	19328.5	21590.3	19385.6	90132.7	24515.1	22561.5	23612.8	14044.1	22836.4	12074.7	5615.72	15896	16044	15297.4	20264.5	19046	19397.9	16853.8	18658	19480.8	16043	9540.63	9597.55	11875.1	10049.8	12392.3	9792.67	9920.37	11691.5	10382.6	19080.7	12803.6	11197.5	10643.1	11534.4	10252.3	11097.8
125	151.04	34.5424	31648.6	30325.1	29099.1	29745.4	28291.9	30717.2	31888.8	28239.4	37675.2	31533	33028.9	33076.9	72420.5	100139	89373.4	37587.5	204811	32463.1	58576.8	54949.5	61284.1	62065.2	63686.5	29017.5	44802.2	35473.8	541262	124851	41166.4	66231.2	60041.8	33047.3	52900.3	32317.9	29780.6	28032	24872.3	37262.8	48918.4	49149.6	78524.4	29053.7	35423.4	38170.7	29545.4	30374.6	44372.8
126	151.076	363.559	18545.4	20842.3	18299.5	18438.9	18538.8	20346.2	19227.4	16468.9	13405.2	15837.7	23822.9	21323.5	10102.7	18194.3	21656.6	24635	9807.09	21797.3	9500.54	7219.92	13152	20166	20069.8	9280.33	16132.7	13349.9	8070.69	14763	7125.03	10852.5	15660	7141.15	7379.36	7950.75	7595.85	7536.02	7138.6	8247.44	7373.05	7816	9598.15	7071.34	8447.57	8242.04	7233.79	6305.99	6916.68
127	151.063	59.9004	19967.5	16686	18540.9	18967.3	20692.1	19172.7	19192	58530.1	71438.5	65774.7	65332.1	64677.9	31420.3	47379.6	41878.7	78273.3	88113.9	72475.7	135476	132920	27927.8	26220.1	27862.8	57400.8	85287.2	72052.4	16925.3	28248.3	93449.1	31332.5	24075.4	18818.2	20813.4	21071.2	18462.7	16996.9	19446.1	19152.9	15493.9	13929.5	182073	18837.1	18453.3	18671.3	14627.2	17664.7	17958.2
128	151.076	317.056	48228.7	49655.1	47328.7	48299.7	53312.5	49753	50133.2	12743.5	11671.7	13524.6	12142.2	12322.5	12452.3	14576.3	12299.2	11957.8	12263.1	11751	13111.5	11594.7	11452.1	12130.5	11442.2	11828.6	12176.2	11533.8	11198.5	12054.7	12253.5	13001.8	11304	9497.95	9508.74	9977.76	9718.18	9131.51	9843.88	8792.43	8459.83	9738.18	12387.2	8707.11	8997.54	10577.6	9159.75	9299.1	9188.7
129	151.076	254.979	29102.8	29669.7	30424.2	30277.6	29362.3	30184.5	32418.5	10831.7	10575.2	10453.5	10286.1	10814	10686.4	12147.1	10336.8	10831.9	10280.1	10773	11423.6	10964.5	9876.18	11578.2	10828	9878.57	11445.4	10448	11559.1	9696.37	11189.7	10829.8	11027.9	9023.96	9032.16	9440.69	8833.35	8661.2	8619.39	8718.72	8720.58	8262.42	11315.6	8374.6	8185.6	8993.15	7668.9	8469.44	8721.93
130	152.033	59.1737	41458.5	39065	43795.8	41288.9	40141.1	41760.1	42049.8	65013.3	114938	86100.4	77993.8	113308	72201.6	138032	97031.6	135542	241241	102167	266073	307998	77469.1	98100.1	79670.7	73590.9	116753	94732.3	462318	86360.4	387517	75800.9	64169.3	37856.9	41513.7	42694.4	38700.4	32578.2	41027.2	37410.7	32440.1	39280.9	326672	41978.5	50002.1	43855	44314.1	42179.6	39115.9
131	152.052	396.643	16114.3	9062.23	18431.1	19594	18440.2	18637.9	18828.4	18596.5	13949	9430.51	14895.1	18086.6	14144.9	19371.2	26735.9	29815.1	61117.8	16319.1	27124.5	79566.1	16169	15022.2	19535.7	18599	15092.7	14417.9	38042.4	16966.4	56301.4	24742.6	15228.9	11869	10745.8	13259.9	14053.1	18222.1	11349.4	11508	9752.85	12179.7	39157.3	14061.2	9080.64	15206.8	11416.1	11292.9	10947.5
132	153.091	309.248	33104	31138.7	29192.9	28625.5	30712.1	30722.7	31935.8	7986.96	6031.18	7236.06	7519.35	6678.79	6892.69	12579.3	7474.82	6928.58	9051.23	6765.22	9119.78	8115.51	8254.03	8747.94	6167.91	5548.4	7077.8	6971.55	9431.86	5459.2	9877.66	6510.85	5310	4268.12	4240.29	6529.48	4238.95	3567.7	4655.87	3781.49	3838.78	5825.06	9646.17	3601.51	7048.15	3970.34	5572.76	4269.61	3983.28
133	153.057	77.6582	53580.8	53822	54323.5	54436.3	52333.9	56408.8	53056.4	103659	63091.3	105406	72938.3	125602	73018.6	110099	108199	110821	146020	63833.2	272883	197301	81140.2	63965.9	80169.7	83869.8	143705	61343.3	264928	82744.1	331461	93747.5	57930.3	46505.5	27867.8	29783	19256.5	31917.4	60554.5	53378	38516.2	43651.5	201968	62437.9	29926.7	24835.5	47263.2	19264.2	43004
134	154.081	75.0686	53053.3	50815.7	55079.3	53753.1	57563.6	53584.6	56867.9	42387.9	45100.4	41434.3	44330.5	48078.4	38730.8	80430.2	71817.4	86422.1	147037	59160.2	107073	127445	54080.2	47984.3	45912.8	34191	72260	60256.5	119237	60210.2	126050	47588.2	48536.3	39035.4	53283.1	50075.2	57791.3	45025.6	61795.5	54146.9	45857.8	64256.4	102815	49480.8	48875.4	56402.4	46091.7	42329.4	45311.4
135	154.044	237.646	80586	79698.3	80126.7	82089.8	81115.5	83197	82615.8	5.63817e+06	5.1727e+06	5.67226e+06	5.26555e+06	5.24738e+06	5.20837e+06	6.90654e+06	5.82277e+06	5.90983e+06	1.25478e+07	5.74926e+06	1.39807e+07	1.34475e+07	4.95997e+06	5.33159e+06	5.49472e+06	4.94297e+06	5.56409e+06	5.11604e+06	1.34447e+07	5.17917e+06	1.38146e+07	4.8725e+06	5.17601e+06	76465.6	74472.3	87337.3	105190	129323	82530.4	85533.9	72083.1	84176.5	1.24255e+07	74260	87379.2	102584	78524.1	79255.8	82622.9
136	155.046	238.37	27067.1	20388.3	27338	21823.8	20808.1	20504.6	20881.6	470048	442672	471154	440668	449049	441159	575658	485030	494523	1.01452e+06	478034	1.12985e+06	1.08976e+06	413260	452757	465432	406887	473482	430079	1.07727e+06	427706	1.13526e+06	412697	439517	7872.96	10141.8	9774.24	12615.7	12661	11246	11036.6	8646.67	9004.16	1.00759e+06	8650.56	9687.89	10886	9253.07	9010.33	10587.1
137	155.079	37.3909	8987.83	13591.1	12474.5	13593.3	14302.4	13309.3	12176.7	10214.5	15693.3	14166.3	13496.4	19201.6	33650	22134.2	11393.3	16904.1	8614.62	12275.4	9449.73	19567.5	13424.6	14921.9	11263.8	7647.23	14974.9	14813.4	22711.3	13275	29438.8	15483.4	7051.7	7187	13586	12075.8	12057.2	5703.61	14019.8	8090.94	6519.53	12445.6	27279.5	18830.5	11967.6	12520.6	8652.63	8156.22	12785.6
138	156.04	237.926	26759.3	26599.4	24182.8	27287.8	25580.5	26233.6	26519.3	1.68525e+06	1.5621e+06	1.68773e+06	1.58238e+06	1.56715e+06	1.54665e+06	2.04561e+06	1.7413e+06	1.77023e+06	3.8062e+06	1.70447e+06	4.28853e+06	4.10047e+06	1.48374e+06	1.58258e+06	1.63909e+06	1.47556e+06	1.66251e+06	1.55039e+06	4.12753e+06	1.56957e+06	4.18071e+06	1.46409e+06	1.56892e+06	27855.6	25878.2	28181.5	36543.2	40667.3	28690.2	29385.7	22966.1	28513.2	3.76495e+06	23372.6	29557.1	33453	25277.2	26671.5	26513.7
139	156.073	43.2494	51721.2	51853	53505.7	52938	53200.4	51506.6	54631.1	76166	104741	102848	94245.9	103236	101541	128946	125396	120043	183104	109500	379693	147110	107320	85504	119153	119508	121907	108651	233211	130077	241609	96693.2	113585	92746.8	58438.9	56123.3	43752.9	44284.5	48290.9	45552.4	46281.3	48717	352026	45599.3	53395.8	50483.4	42480.7	51737.8	46017.6
140	157.088	434.978	19653.9	22381.9	22400.8	22008.9	22525.6	20870.1	22917.9	6388.29	6560.57	6487.62	5897.21	6969.18	6993.71	49953.3	7002.85	7117.66	7826.87	6396.79	6743.8	8115.98	6101.61	7145.23	6629.79	6930.3	6951.38	5540.14	9850.49	5233.11	10187.2	7369.46	5913.44	2511.92	2380.75	2608.07	2785.97	2551.53	2264.89	2212.55	2542.02	8647.83	8186.58	2402.68	2463.88	2337.12	2607.25	3007.09	3664.56
141	157.086	323.031	33230	31951.1	32310.2	32799.2	34424	32115.7	31301.3	11434.4	10488.9	11357.5	9613.35	9133.21	8874.24	19032.2	9865.41	9249.68	7807.56	8473.68	9776.02	7340.92	9306.67	8352.5	9938.24	7222.48	8311.17	8093.59	7517.01	8686.33	8524.46	9761.61	9706.93	4507.57	5164.48	4296.94	5112.01	4236.9	5614.6	4080.29	4552.12	4222.31	10224	6158.79	5153.45	4424.78	3610.3	5738.22	3882.33
142	157.043	238.292	10057.2	9903.79	9132.61	9231.68	9792	8045.64	9337.23	160886	146671	158678	144921	152580	145864	189709	159475	163002	341401	159452	377779	356655	138888	142102	151615	135727	150303	147676	359432	145824	367733	140030	143261	9853.52	8581.34	7549.53	8541.42	10689	9062.26	7587.62	8712.09	8701.34	322788	10152	8757.13	10152	8440.05	9163.5	9418.16
143	157.111	371.645	52402.6	52300.9	48931.1	49390.3	49595.5	52625	50718.6	20315.4	17387.1	18649.8	17870.1	19030.5	18275.3	35886.8	18219.5	17435.6	16610	18138.5	19111.5	16832.3	16607	17115.5	17829.2	18708.3	16791	17840.5	20812.8	16599.8	20402.8	16163.6	16699.7	8175.41	9102.75	9048.65	9954.86	8551.48	7909.03	8697.7	8541.68	9987.54	19464.9	8041.01	9538.84	9921.98	10258.6	8670.18	8409.7
144	158.003	16.4932	56450.7	58148.1	57247.7	60511.5	61782.4	63194.6	61020.1	116257	115844	120025	116229	111208	119532	107698	120482	123441	120710	115867	126301	115484	108928	112342	113381	115533	115703	116649	122857	105953	116710	115532	109184	59769.4	55531.3	57743	60671.5	0	58579.1	57018.7	55552.5	60395.1	126416	59858.6	59420.7	58716.2	60557.7	60002.3	57223.6
145	158.154	508.385	111800	114038	110143	111286	113934	112011	109965	244205	213390	227826	220797	213201	224415	928459	227649	214106	183837	212126	239350	213665	195454	213859	213644	213877	208017	207210	206536	195437	217787	227526	218897	105756	116199	103880	99418.6	101740	105828	105793	105821	106727	209235	108999	104996	109388	108315	112338	109918
146	158.967	37.0319	215360	218151	219447	228564	227239	222207	225992	405797	398662	426151	394810	394948	392599	391486	351333	348471	283359	310501	343175	258087	302067	302304	309846	316853	309544	320196	256333	312822	305711	398711	305863	212337	213202	215115	214876	220308	216663	217127	216118	222073	350710	226233	205037	214883	221455	221967	216991
147	159.076	240.587	59612.1	59366.9	61433.1	60406.7	61429.4	59785.7	60007.4	76488.3	95590.9	59498.7	88857.4	91844.7	60426.7	193682	162777	188785	212578	121304	309820	230761	106683	91665.8	113268	77953.1	106149	118338	276586	104509	170300	67031	99068.6	58916.4	68584.9	57507.1	59595.3	58129	71042.8	56993.5	62979.8	44235.8	381913	59636	63297.6	62903	45278.6	52024.9	68958.5
148	159.154	508.358	12317.8	12766.9	12496.3	12075	11201.4	12507	11333.4	26978.3	21373.8	24142.7	22148.9	23272.1	23253.5	92575.2	24978.5	22258.7	18370.5	21558.3	25114.8	24017.5	20693.5	21737.9	21281.4	20892.4	21736	21591.2	21554.8	19625.7	23270	23627.4	23551.2	10907.4	12421.1	10423.3	12129.6	10474.3	11263.2	11380.7	11724.4	11456.6	21896.6	11827.1	10429.4	13014.9	12325.1	12646.1	10812.6
149	160.105	43.334	46788.3	43608.1	46639.4	49002.3	48955.8	44892.7	48577.3	107633	81378.6	79026.2	73473.3	84158.8	72232	98099.1	56911.4	161989	195988	105385	222451	675120	41840	52750	89613.4	137879	66683.9	104306	314576	82634.3	446040	78942	52834.1	30789.7	60854.2	38259.9	46147.7	42903.4	51244	56866.5	91323.1	35699.3	406375	45078.2	26945.7	38513.8	42238.8	50153.9	107577
150	160.075	106.56	19821.2	19185.7	23044.6	22112.4	18117.7	21171.7	21012.4	36853.8	29678.9	22369	38307.6	27900.5	31682.7	62715.1	14285.1	30548.6	46275	41109	33329	57194.5	33113.3	28339.5	26335.5	40041.7	37534	37779.1	31637.3	22698.8	39946.1	24403.1	25615.4	17036.8	9162	23222.5	26259.6	14152.4	16077.1	30256.5	19560.7	15446.1	27734.5	23033.4	16454.9	33461.7	10499.3	8155.82	7306.3
151	160.123	289.312	13628.7	14302.2	14910.8	15049.6	13029.2	14121.2	13940.4	27783.9	16666.9	24756.5	17429.1	15429.4	18920.7	19970.1	48650.3	21449.4	42651.5	18690.3	59079.8	54102.7	9935.92	26645	29423.6	30613.2	22236.3	22314.7	85177.1	24766.3	69745.4	26754.8	9793.69	13803.4	22511.2	10331.4	22589.2	12750.4	25488.3	3302.24	7953.9	25480.3	55588.3	8280.2	32731.5	13914.9	14131.4	22292.7	10476.9
152	161.096	690.573	48858.1	47478.1	48476.3	51720.3	50575.9	47683.1	51871.9	47730.1	57210.3	53488	55522.9	57414.4	54600	209898	67167.3	61731.5	44730.9	47436.1	51179.8	38177	27009.9	44336.7	41731.7	44098.7	45352.2	39718.4	42634.6	42038.6	44755.8	54994.9	41686.4	46304.6	45503.1	46653.6	45641.8	49777.8	44153.1	47596.5	48070.1	47324.6	43876.9	46762.2	46875.8	44983.3	46281	47491.1	47173.2
153	161.095	546.189	9853	8964	8953.58	9515.05	9311.15	7887.05	8184.69	14046.3	12380	12739.5	13738.7	13583.7	12284.1	52141.5	15077.5	12026.7	13948.1	13394	12249.4	13422.5	9088.77	12463.1	11363.4	12747.4	12896.4	10950.9	12039.3	12404.7	11478.8	11454.9	12433.7	9002.39	9565.62	9089.84	9224.49	8133.11	7701.37	8720.77	9273.43	10035.9	12219.9	8531.1	8387.89	7324.05	9038.46	9889.02	9377.93
154	162.113	42.0376	1.02743e+06	1.02517e+06	1.0468e+06	1.03516e+06	1.05557e+06	1.04934e+06	1.04955e+06	1.49942e+06	1.43023e+06	1.87468e+06	1.77789e+06	1.65219e+06	1.25018e+06	1.93271e+06	1.86599e+06	2.15002e+06	2.70167e+06	2.09501e+06	2.53614e+06	2.52036e+06	1.63128e+06	1.36051e+06	1.33437e+06	2.07421e+06	2.13592e+06	1.76826e+06	1.35312e+06	1.59247e+06	2.05102e+06	2.30603e+06	1.78858e+06	1.20373e+06	1.05058e+06	671248	874935	948185	1.17589e+06	969065	877802	659021	2.24386e+06	860891	1.09089e+06	846514	910743	946229	1.24132e+06
155	163.106	41.4432	93286.4	101650	98186.8	94172.9	99918.1	102236	100472	127181	130188	164647	148175	140565	106344	165901	158019	183228	220628	174026	199138	204328	137140	117089	112396	171028	181795	150553	116478	139399	165434	189313	150401	111922	100526	73475.5	88318.6	93183.9	112028	92037.5	88111.4	73752.9	182583	83366.2	102436	87838.2	89202.7	93955.4	112124
156	163.133	356.725	87570.3	85048	86846.5	86146.5	90352.4	87385.6	89235.3	143107	148571	144490	140456	142159	141339	335472	153804	144346	129115	133444	132430	102369	133694	149072	134101	143857	144367	135043	144922	137034	164173	143101	140444	90543.3	83324.2	89813.3	83927.5	94478.8	82972.2	89653.3	86417.2	88538.3	150845	82997.3	97739	85196.6	92226.2	89917	87082.1
157	163.037	458.416	2430.32	2671.09	2659.41	2401.53	2151.61	2439.67	2658.5	14101.6	14757.3	16229	15924.4	14305.8	15571.9	107766	15135.2	14141.5	13587.2	14228.2	14061.4	11722.9	14715.3	12390.2	13365	14459.9	14393.7	13999.8	12992.1	13336.9	14718.7	13987.8	15622.9	2304.78	2190.37	2462.28	1945.19	2739.33	2066.87	2975.05	2765.18	1670.87	14054.2	3050.61	3073.4	2085.22	2411.79	2684.18	2694.91
158	164.054	40.8571	17827.7	15757.1	17591.2	15985.8	16803.5	17811.1	18742.3	17180.8	22204.5	24531.3	20955	20610.8	15740.1	25558.1	26890.5	27406.8	31373.1	23967.5	26295	31173.7	19725.3	21363	15557.1	23192.4	25039.2	22019.6	25890.4	19835.3	28057.7	22902.2	17492.8	18842.5	17643.6	17446.1	17044.2	15670.6	18113	15402.2	12999.2	16924.7	28334.9	18243.3	20994.7	14431	21050.2	15872.5	20478.2
159	164.131	357.693	10685	10117.4	11605.9	10415.4	9727.01	11025.4	10962.4	13258.2	17138	15635.1	14859.2	15381.9	15379.8	37204.5	16367.2	14282.7	13399.1	13888.7	14517.4	10460.5	13387.2	14893.9	13350.2	16246.2	15138.1	14219	14332	14539.2	14460.4	13909.1	14342.8	9762.57	9517.24	6696.31	8673.75	8571.39	9364.63	8959.31	8211.84	9239.94	15304.4	7063.31	10083.8	9923.89	9303.38	8372.25	8212.51
160	165.013	238.297	3245.67	2545.37	2821.3	3056.97	2621.7	2730.14	2602.91	35683.6	32273.6	33770.9	35366.6	33194.1	34825.2	43815.4	34710.9	35619.4	74912.2	33298.8	84510.8	80500.8	31851.5	32949.2	35673.1	31463	33534.5	32855.1	80598.7	31772.4	85442.8	31128.9	31748.2	1868.31	2255.84	1850.84	1849.38	2724.61	2844.31	2135.54	1818.47	2462.36	75042	1975.25	2396.02	2718.29	1903.91	2661.97	1918.33
161	165.054	68.0437	124121	122931	129065	131421	129866	127454	127712	199607	232935	320893	220183	213965	186075	373118	270504	349782	538165	291978	629097	592378	185476	166958	205740	205637	264415	221508	743454	230930	649526	238998	176930	112368	125897	149839	89906	114395	121844	115481	105981	88788.5	903910	140737	115909	122318	90902.6	114881	144439
162	166.088	128.771	3.30857e+06	3.3195e+06	3.38142e+06	3.42251e+06	3.41706e+06	3.43541e+06	3.39199e+06	4.83304e+06	5.79221e+06	4.82978e+06	4.45653e+06	5.15196e+06	3.68001e+06	8.10653e+06	6.12557e+06	7.54399e+06	1.13317e+07	6.00548e+06	1.38255e+07	1.18628e+07	4.93931e+06	4.19951e+06	5.16172e+06	4.02735e+06	6.00049e+06	4.93904e+06	1.52746e+07	4.66581e+06	1.39469e+07	5.10227e+06	4.99137e+06	2.83763e+06	3.77121e+06	3.55823e+06	2.6959e+06	2.72669e+06	2.96766e+06	3.00201e+06	2.73317e+06	2.92282e+06	1.35516e+07	3.30092e+06	2.78586e+06	4.11341e+06	2.39785e+06	3.01824e+06	3.08765e+06
163	167.089	128.771	324979	322135	325919	336072	331823	332365	328987	480699	568892	476388	438671	502253	366229	781196	605823	731326	1.07242e+06	585602	1.29939e+06	1.09745e+06	484749	421545	511696	399889	594086	485733	1.43966e+06	458939	1.29572e+06	487067	489020	281580	357696	349549	267581	269428	279223	297980	271686	288657	1.25176e+06	320921	273040	397765	241540	294756	298340
164	167.033	270.745	18826.5	17957.3	17280.2	17952.3	19053.7	19328.6	18964.2	14218.2	14808.9	36680.2	23370.7	25694.9	23320	20511.5	29707.9	33595.1	38884.4	19055.7	31517.7	23552.4	15909.3	28265.6	28470.1	14627.9	21809.5	27696.2	27140.1	37486.6	22491.7	14890.9	16057.6	12172.8	10669.4	32592.3	8704.62	33614.2	9004.37	9642.94	9513.17	8053.22	17683.7	15789.8	10430.2	8258.95	17262.6	34902.2	10085.8
165	168.091	128.555	31957.4	41427.4	46814.2	48766	52257.7	52383.6	51285.6	40971.2	47844	42317.8	39566.1	44507.7	33333.7	74041	53952.6	61134.5	94879.1	50239.3	111059	96469.3	45943.7	37449.2	45987.6	35410.2	49332.1	41707.9	128480	40288.7	115514	45418.4	42106.3	22548.7	29727.2	30896.6	22158.9	23163.3	28544.2	29248.4	22470.5	25002.6	108484	29213.1	27063	65439.1	22421.8	29068.1	34017.1
166	169.036	59.5885	534776	538749	557106	557078	554708	568771	559949	735163	738989	753535	976185	1.0528e+06	554859	944016	1.2388e+06	1.31551e+06	1.62684e+06	885669	1.74992e+06	2.74009e+06	519167	561654	945647	583795	951004	815585	2.26942e+06	1.15737e+06	2.06012e+06	704207	700836	490264	510213	615011	325227	548523	715979	465816	452589	551910	1.72875e+06	407479	476457	415479	385682	556136	481312
167	169.087	362.581	24672.4	27028.2	26723.4	25901.8	26141.3	26026.4	26580.2	7351.04	5915.67	7832.32	6113.21	6920.33	5387.06	18276.5	8648.21	6304.45	8053.98	6933.56	5919.7	4423.45	4874.97	6477.76	7275.05	6596.46	7002.48	6102.95	7069.54	5723.29	5790.88	6947.79	4661.72	3504.68	3537.46	2838.23	2482.21	3476.29	2563.6	4117.51	2323.79	3498.07	7775.36	3706.18	3343.1	3572.25	3086.8	3263.75	3593.79
168	169.086	254.979	54936	56416.7	52632.6	53366.6	57230.8	56118.4	56410.9	6659.66	6921.92	6451.03	7049.4	5871.93	6299.17	11194.5	9609.21	7362.63	10284.8	7525.91	8841.79	10391.1	6864.63	6113.3	6546.48	7092.45	6608.83	7421.69	11284.5	6507.16	11601.5	6352.58	6909.56	3580.03	3109.3	3493.96	3536.73	3304.59	3045.38	3398.53	3787.58	3991.6	11299	2896.8	3391.37	3698.91	3858.83	3425.31	3826.87
169	169.086	310.846	45721.1	43175.1	46018	44279.9	46805.9	45957.8	46054.7	14728.1	12058.3	11840.2	12999.8	11889.6	10833.4	22719.3	12774.1	15314.4	28259	13115.7	18741.6	21012.6	10019	11986	11557	9778.14	14128.4	11599.4	21713.7	13128.1	20508.2	12377.1	11215.6	4811.53	3807.87	4429.25	4301.52	4337.77	4788.41	3965.01	4741.71	4441.18	25500.5	4112.93	5064.82	4700.89	3928.27	3534.13	3387.35
170	170.037	58.646	46721.1	45571.7	47268.6	50619.7	47260.3	50107.4	51473.9	93500.5	73482.6	71815.3	81870	88952.4	58765.2	99165.1	106677	115900	119377	80892	127862	196696	51474.5	59396.2	85083.1	67290.2	86811.3	86299.7	167321	96210.7	155057	72837.8	61002.7	42451.9	50136.1	56407	42383.6	46880.1	59713.9	48833.6	45222.8	51368.5	131690	43942.9	38469.8	38022.5	37405.8	51370.1	45554.2
171	170.06	240.837	21324.7	20567.7	20479.5	22729	22252.5	23276.3	23802.8	26481.1	34938.8	18523.3	29491.8	34184.2	21215.1	43630	41079.7	56790.9	71320.9	32760	87048.4	87166.9	33885.2	27009.8	33551.9	21493.3	30265.5	35221.8	101826	29381.2	59799.1	22641.9	30348.7	24590.5	26522.1	21834.9	22723.7	21298.9	28395.3	20127.3	24525.7	18114.5	104531	23950.9	21958.6	23992.5	16520.2	18737.4	27631.6
172	170.111	307.306	8846.41	8468.22	8767.36	8631.11	8603.77	9330.83	8535.77	5690.94	7140.27	6611.97	7472.46	6239.24	5546.66	10413.7	6316.45	7199.64	9595.25	6921.76	11732	13636.1	5288.35	6426.86	6751.96	5547.25	6722.08	6998.56	30289.3	6059.78	10985.9	9278.64	6361.66	32062.5	43446.2	70684.6	39863.5	18273.9	31569.8	27873.6	39532.5	49645.8	12064.2	32737.7	88026.7	40098	85588.2	28287	30559
173	171.034	58.5889	5791.85	6935.49	5925.98	7040.39	6724.16	6528.85	6796.99	16055.8	11319.1	11196.6	11167.3	14768.6	6733.5	9243.31	17421.3	16401.7	18547.6	10984.9	14505.7	31372.3	4638.97	5909.04	10348.7	5819.66	9858.09	10000.5	17592.8	11461.6	17594.4	7191.98	9744.66	7368.49	6161.75	5673.89	5275.62	7097.34	9266.46	5788.2	4940.63	6514.37	17220.6	5557.01	4963.9	4296.21	3778.81	5476.04	6126.54
174	171.102	365.912	539945	530845	519087	526884	535109	529742	526455	8368.08	8166.62	8513.45	8088.96	8624.22	8248.32	18241.2	8826.78	9045.67	9223.46	7597.99	8527.21	6491.3	7393.01	6989.64	6659.72	6487.23	7754.9	6681.65	18088.9	7829.89	9097.76	8368.71	4971.05	8937.7	8202.37	10111.3	8799.55	8149.46	8439.68	7763.73	8401.68	7806.24	9039.85	7362.05	8664.43	8466.67	10499.4	11304.7	7107.67
175	171.102	468.649	229064	219069	221119	233159	227848	230667	223298	9926.43	8070.77	10649.9	8353.62	7695.03	9391.34	29569.9	9262.88	9529.58	11395.2	8978.24	10113.3	7857.36	9349.47	9179.83	8713.64	9429.12	9117.03	9849.9	8869.83	8586.38	11901.5	8939.38	7550.9	2315.49	1484.28	1788.49	2332.54	1302.53	1802.52	1955.31	2025.46	1941.23	10749.7	2244.43	1179.06	1948.11	2390.63	1814.01	2235.91
176	172.132	321.891	15855.1	14729.8	15464.6	15938.5	15205	16117.6	15344.9	14238	15190.2	12215	19919.5	12115.6	12334.3	24237.9	13856.7	19712.6	20742.3	15913.3	28700.7	17129.8	13054.7	13359.7	13799.4	10030.3	18571.4	21746.3	42697.5	15283.9	22187.8	14553.3	12501.7	42907.9	60034.3	74196.8	43595	34075.6	38761.3	34012.6	48812.2	72912.1	28822	47678.2	86850	51643.8	88554.2	41404.6	30617
177	172.105	468.546	25139.3	24085.7	23567.1	26009.5	25977.5	25405.3	25007.5	2149.1	1751.32	1745.38	1115.01	1548.59	1331.33	6462.03	1978.03	1961.06	2274.26	1945.96	1954.34	1795.5	1191.49	1971.94	2294.05	1589.68	2296.35	2100.5	2160.08	1531.5	1997.86	1153.48	1752.35	375.45	1292.34	127.099	661.867	572.673	855.487	566.273	1437.6	1167.12	2384.64	954.87	732.742	575.339	866.333	479.894	614.838
178	172.105	366.098	58466.6	54549.8	53675.3	57043.6	54500.4	54846.3	56759.9	2618.33	3045.07	3816.82	3259.54	3083.74	1717.18	7317.05	2878.95	3267.67	3276.95	2533.91	3363.66	2574.86	2345.49	3164.05	2858.05	2028.81	3249	2815.72	4136.72	3020.75	2697.26	3015.05	2402.46	1747.45	1730.26	2423.45	1893.44	1746.22	1800.21	2582.12	2350.31	2133.78	3640.22	2084.72	2744.64	1199.56	3070.67	1385.14	1512.93
179	172.17	505.337	13060.5	13510.7	13351	15665.5	12928.3	13989.6	14003.2	51983.1	272225	1.22111e+06	27215.6	335602	20387.7	1.81716e+06	1.46726e+06	287222	49608.4	214474	128063	104433	80114.5	81651.9	114534	2.11268e+06	2.05598e+06	87503.7	4.39562e+06	1.13149e+06	6.89769e+06	1.29787e+06	165665	805862	21431.2	11912.1	36237.3	549834	22378.6	17322.6	12963.3	17827.5	5.20181e+06	15953.1	34970.5	17168.1	13154.8	16934.9	13134.5
180	173.082	254.363	62061.4	64006.5	61064.1	61975	58696.3	62971.1	62270.7	7047.8	6554.58	7509.63	7479.37	7148.44	5960.32	8308	6643.21	6657.99	8009.27	7388.74	7296.93	7150.83	4904.18	5325.91	6215.53	6043.61	6328.38	5335.02	7298.52	6288.49	7901.22	7334.92	5774.81	66942.9	64874.6	65535.7	63542.5	69135.6	66334.6	63366.7	66895.2	68610.1	7375.19	69707.8	65319.8	65792.8	67632.1	63151.3	67911.3
181	173.114	372.961	22429.1	21019.3	22896.4	23685.4	22231.2	23317.1	21513.4	5222.29	6240.01	7219.36	6516.32	6232.64	5153.37	10689.5	5502.55	5929.24	4307.42	6400.61	5148.41	2381.82	5380.9	4565.35	6505.95	5736.17	4691.14	6210.19	5648.82	4729.49	4693.82	6573.71	3954.24	6744.48	7575.54	6304.22	6197.09	6259.28	6867.2	6229.08	6227.87	8093.57	5466.05	6833.82	6171.73	6945.93	6505.16	7046.9	6240.95
182	172.99	52.1095	29708.5	28372.8	27865.3	28999.6	28017.6	26158.3	29467.7	34139.4	33836.9	31929.2	28697.1	27871.3	33978.5	17983.3	22485.8	18707	13792.8	16641.3	18086.4	16464	17069.4	18201.8	15931.1	22986.4	17235.2	18761.7	19289.8	17865.8	35873	30785.9	19583.9	27986.3	29923.5	26763.4	30423.7	27785.5	26452.2	27781.8	29458.9	25884.6	15927.7	29688.3	29492.1	26320.8	27998.4	28723.3	28838.3
183	173.157	509.08	7603.65	5520.68	6678.1	6620.87	6078.86	5435.7	7425.56	34216.4	55210.6	150134	30286	57988.9	31650.9	304422	183432	54463.6	28280.1	48648.7	40218.7	34834.7	32902.4	34450.3	38035	247771	244235	37997.8	482321	140427	753950	163739	43550.3	96601.3	7195.5	6759.33	7824.11	60421	6671.77	6357.08	5901.95	6915.73	573186	6674.01	9033.79	6129.58	6814.25	7453.78	5806.67
184	174.084	256.839	8987.49	7188.54	9516.78	8859.95	9423.62	6660.13	9012.37	5794.18	7439.37	5181.11	5631.35	5313.54	4711.17	8068.34	6376.46	5657.74	7177.84	6120.42	8621.03	8134.62	5032.14	5554.59	6252.62	5170.03	4660.67	6485.81	8785.57	5635.99	7562.75	6409.74	5558.92	6283.14	9102.36	6230.8	7014.99	6745.08	8211.55	7331.18	8655.46	7943.94	7191.62	8476.36	12312.4	6440.96	11177.6	5811.49	7966.64
185	174.035	52.5378	6928.22	5942.66	5559.16	6314.52	5545.34	5046.02	6498.92	14981.1	18295.9	16023.6	15287.3	18183.2	16568.1	25208.2	17299.8	19608.3	10748.7	16716.6	14409.1	14564.7	14457.9	16732.5	15690.4	17371.8	17067.7	17713.4	43837.7	14209.8	15037.3	16865	12313.6	4144.51	7211.04	9395.97	5028.99	3997.05	5797.6	4734.19	4583.11	5244.66	23928	5583.93	6329.69	5908.38	5115.47	5417.16	6800.71
186	175.117	39.7219	72951.1	76809.1	79647.4	78423.8	77914.6	77244.3	80383.7	104390	132708	123295	96838.8	70273.5	96733.7	179437	218099	106994	209341	166219	154242	163419	82255.3	136503	89275.9	136487	134852	93734	150519	100057	405364	167090	88373.4	77164	62111.3	78775.6	85156.4	63000.8	59386.5	74688.5	60245.2	54097.5	178368	58870.4	93444	56467.6	63434.5	67368.2	74071.9
187	175.107	72.1267	57578.6	54679.8	55003.4	56265.1	58027.2	53098.9	57329.4	89332.7	128204	172741	88256	123701	119216	160376	135427	254637	506488	95285.5	364458	460214	137206	117495	159675	34382.9	99249.7	133475	365865	126796	145302	50913.4	149607	40166.8	76887	42894.6	33824.9	48676.2	50624.8	63390.4	49617.2	66078.5	470976	74373.2	56721.6	92700.5	68478.1	26870.6	50784.6
188	176.074	204.965	134172	136685	136050	135847	138264	134913	135443	131743	222020	161375	225521	331589	165731	251679	224931	376109	533617	233049	259434	716013	298139	207330	119527	317905	265289	252996	561838	133805	916986	136077	436382	312461	179063	180682	139909	106610	203260	142375	150296	133407	581296	165803	176511	161667	95525.8	221786	340787
189	177.057	37.8627	37235.8	37926.5	36909.5	36303.2	35766.8	37412.8	36038.2	21973.1	118248	33070.2	28294.2	35538.1	54689.6	44391.9	26109.8	34608.1	26757	24247.7	28910.5	45511.2	27093.2	27010.5	26360.4	20911.6	32219.8	79538.5	56628	29382.3	63686.3	289499	16174.5	17042	26040.6	22139.4	18175.6	13108.4	24534.7	16818	15286.4	19940.4	61827.6	21050.4	33073.2	18278.2	17556.9	17948.1	18996.9
190	177.086	108.703	12458.8	10226.2	10399.2	9793.29	9893.37	9545.64	12418	19139.2	12208	13084.1	19784	14798.3	16955.6	37858.5	8300.92	17961.8	26820.8	24875.5	32486.6	29880	20040.1	14185.6	14292.6	23618.5	21365.6	22287.1	18095	13084.2	25637.5	8185.23	15155.8	9307.38	4903.22	11636.7	14851	8000.53	6319.97	14752.4	11500.5	7752.68	19426	13371.8	7833.65	19092.6	5232.32	3854.76	3425.57
191	177.076	204.936	14850.5	13154.1	13056.6	13863.4	15422.3	15001.7	13065.7	13207.6	24285.1	15919.6	22242.7	31280.5	19182.9	25602.7	20947	35411.5	48733.1	22613.7	25329.9	65019.6	27933.3	21296	12805.5	31100.8	28601.1	24533.7	49643	13119.3	87552.3	15258.4	40462.2	27823.2	18246.2	16565.4	14487.3	9454.02	19038.9	14511.8	14147.5	13224.1	54771.8	16106.4	16482.7	15113.9	8823.85	22502.6	30133
192	178.054	39.6206	11611.5	12795.9	12053.2	13122.6	13537.9	13546.9	12739.9	18548.2	33365	20591.5	19832.7	22203.2	18456.8	22250.8	28618.5	22099.5	26917	27288.3	46698.7	32119	15629.9	15921.8	16653.9	16192.3	19757.9	26731.5	114473	18443.9	42475.2	42354.6	15029.8	11677.9	13710.2	13465.5	10912.7	10713.6	12895.8	12553.7	10627.4	12403.5	51546.4	11636.5	16507.3	12594.6	10698.5	12364.6	13342
193	178.066	204.836	8473.78	8398.65	9085.65	8832.71	9909.94	8166.85	9129.12	8665.44	13488.7	9948.88	11826	16972.6	8180.49	14190.6	11595.8	20555.2	26118.7	14064	15246.1	37059.2	16953.9	11535.6	7404.56	17204.6	13097.5	13591	29319.3	7997.58	43453.4	8615.67	20970	14602.4	9972.69	10643.5	7446.9	6240.65	12267.7	8845.23	8676.56	8325.08	31734.6	10075.5	10507.6	7985.24	5991.43	12142.6	17035
194	179.012	17.0162	13119.7	12180	12430.3	0	12408.7	11655.2	12654.6	17246.7	18537.5	18263.2	18850.5	17831.8	17253.8	16428.9	19855.4	19126.9	17117.8	18190.2	16196	17746.9	17470.5	17598.4	18937.4	16659.7	16852.6	16357.1	16932.7	18478	16982.8	17740.9	17497.6	12007.4	11679.1	0	12570.8	0	12306.1	11201.6	10591.8	10868.6	26981.9	12580.5	11923.5	10667	12228.1	0	12418.2
195	179.087	339.747	9225.73	8093.68	9680.16	8934.58	8137.95	8976.01	8976.01	13105.6	13824.5	9650.38	11951.7	12589.9	12006.5	26837.5	18629.5	17590.8	17356.2	21363.7	28522.2	45383.2	11353.5	12888.2	12924.5	16462.7	27246.3	14601	43983.4	26931.2	19975.5	10106.2	15157.8	7511.61	9523.24	4013.09	11983.6	10737.3	5951.41	6826.37	10009.7	14170.2	26353.6	6348.27	10431.7	13795.9	7244.11	5697.08	10380.1
196	180.068	279.703	8947.37	9402.71	9333.76	9748.33	7963.14	7497.67	8877.11	57511	25560.8	15917	19716.1	14449.3	101750	90086.5	16972.8	18206	31757.8	34933.3	157265	54913.5	9169.15	67693.7	35450.7	33521.1	18338.3	34515.1	24559.5	52062.1	50444.2	14401.1	166292	22172.6	3055.09	65727.6	13151.5	61956.7	23026.9	20302.2	43509.6	119160	37758.5	6846.91	25310.2	22517.1	3380.33	4690.48	62558.1
197	180.155	356.728	14818.5	12055.3	15186.9	15116.5	13694.1	13697.1	14317.9	21376.1	22127.5	19984.5	20346.4	19552.8	19221.4	42837.1	22008.7	20833.3	19646.6	19886.7	18670.1	12431	18956.6	21119.6	17730.7	22611.5	20811.4	20608.1	23828.9	20558.4	23413	21350.6	19739.4	10060.4	9398.34	11398.5	10202.9	10706.3	10494.9	9221.12	9518.04	10781.1	24091.4	8564.63	11384.1	10231.1	10174.9	10345.7	9185.8
198	181.087	474.729	67529	64284.5	63551.8	66050	66655.9	63642	66441.7	57003.1	75010.8	10335	63627.8	32558.8	56738	200356	171227	196222	116493	167804	598521	485579	91848.7	82940.8	181716	86595.6	176080	150710	360738	371662	440808	68818	120494	63514	87793.5	27358.8	70594.2	81803.1	98166.1	26204.8	80621.1	110197	476549	30022.9	89224.6	92333.3	25092.7	23702.7	73916.2
199	181.058	176.407	18245	18599.2	18702.7	11490	18645.7	18856.4	18152.7	77216	2977.78	14425.3	35071.1	3001.52	4564.23	4480.12	4941.17	40214.7	8813.08	6084.25	145973	3645.66	4117.11	3380.54	8810.5	3266.45	3285.75	21216.8	4700.36	35572.4	143963	3230.35	3581.28	17182.1	7228.58	5397.33	4920.9	15508.7	7548.88	21802.6	26564.5	23557	7097.18	24472.7	17943	5759.59	12344.3	9897.03	136770
200	182.082	68.1151	675313	684356	698392	704067	697008	712480	705384	1.06889e+06	1.26048e+06	1.84156e+06	1.21758e+06	1.177e+06	986131	2.10234e+06	1.52724e+06	1.92923e+06	3.09781e+06	1.58535e+06	3.63596e+06	3.48356e+06	1.01534e+06	914152	1.08594e+06	1.11271e+06	1.41683e+06	1.21569e+06	4.40235e+06	1.22019e+06	3.68995e+06	1.2818e+06	939837	607993	696473	826372	489835	621034	638294	641323	571693	483476	5.27709e+06	769370	620102	683893	471491	620110	804763
201	182.985	22.8393	77561.9	83467.3	82641	78551.7	80168.4	83392.1	79461.9	51148	45801.9	50330.8	44584.6	46993.4	47766	28046.4	49870	48846.2	49742.2	45200.5	48375.4	44582	42811.9	47113.5	44571.2	43430.6	42330.4	44036.6	43503.3	43135.7	42531.3	49706.4	42334	78127.1	77932.3	76754.9	81484.2	74069.7	75436.5	75735.6	79879	79168.5	48917.9	82099.8	79896.4	80337.2	79109.1	78694	77486.6
202	183.075	68.0437	80902.2	85381	83929.9	87865.7	88173	87699.3	87965.4	121825	139184	193734	135837	128388	109769	215287	164700	201564	311143	172689	358189	342242	113140	105309	120062	126906	151689	130846	420416	131529	361229	143397	104023	77260.1	83819.4	97198.7	61085.9	78260.3	78517.1	76471.4	71421.4	62338.4	511275	90218.6	81097	76972	60737.2	79611.5	96234
203	183.099	318.678	42028	41550.9	41242.2	42663.8	41495.6	43837.5	42591	13318.9	14416.8	13839.7	13603.2	13335.9	13490.8	19332.1	12042.7	12206.9	11965.1	12477.2	13316.3	12213.9	12363.3	11958.7	12501	12214.5	12836.9	12953.1	11622.8	12271.8	13649.2	13863.3	10888.6	6042.42	5932.06	7003.06	6301.39	6787.31	6140.56	5938.49	6941.56	5584.19	13917.8	5678.3	5880.55	5730.21	6739.57	6515.79	5743.71
204	183.012	238.01	7754.46	7845.89	6587.57	9022.91	7946.54	7954.79	7225.72	50426.3	47038.8	50366.1	46308.5	45698.4	46298.4	52267.3	45471.6	49053	89980.9	49922.8	98268.5	95160.5	42942.7	48648	48065	45729.3	54432.2	46960.6	92726.8	45151.5	97991.4	45140.3	45322.1	7651.83	7460.42	7486.49	7556.05	7725.18	6680.78	7650.51	7065.3	8113.14	92079.8	6987.47	6170.56	7480.05	7792.03	7446.07	6589.44
205	184.089	39.4333	68684.8	70030.1	74198.9	71154.3	74313.5	71847.8	76751.6	44459.5	43402.1	57584.7	57911.3	52183.4	40693.3	64856	60866.9	75918.7	97329.4	62521.6	88108	126599	45924.1	43234.2	38811.2	64377.5	72448.9	58953.9	71632.9	65689.9	59041.9	66761	67587.1	76826.9	70196.6	42012	64356.4	74327.6	82905.2	76461.9	75679	52721.6	76415.1	52590.8	71501.9	73283.8	69103.3	69991	83747.2
206	184.073	627.158	157940	164874	155461	158592	165396	164759	162769	302387	369579	315245	378469	426065	299093	356965	449205	585063	1.08164e+06	464972	111659	176844	437831	435428	496249	345000	445700	393536	277139	439893	132059	327403	352534	292175	307487	255144	288796	238359	286622	227332	217433	246313	150072	244671	294925	311693	260126	290016	275085
207	184.073	703.575	31090.1	24165	21138	18836.3	20900.9	21174.9	19968.4	49199.2	69646.6	68646.5	61217.6	76376.4	61262.9	42266.2	61432.1	88135.7	197698	186353	28991.8	50437.5	103827	87626.3	106296	102322	87285	81445.9	50975.9	102369	37369	60760.9	72319.2	80567.5	75639.5	74109.5	60593.2	60482.4	80418.1	65097.5	67809.7	67180.9	30116.7	73663.6	69820.2	68138.6	51368.4	67830.2	77940.9
208	185.117	199.355	42656.6	43644.6	44933	41765.2	43581.5	42804.6	46800.8	51140.4	57633.7	47637.9	59625.4	76368.4	47710.5	91889.4	67035.8	112387	98611.6	67866.9	145200	247571	39729.7	57952.8	48000.6	68661.6	61520.3	44056.8	96018.8	64430.3	99779.8	101826	69309.1	50179.2	27541.1	30622	18433.6	54410.1	34245.3	31571.2	30192.9	37109.2	187333	42307	20814.6	41331.3	36508.2	29797.3	24202.4
209	185.114	359.94	70284.6	68070.1	69471.6	68766.4	68973.4	70785.8	69897	25689.2	24732.4	24546.5	22544.3	22536.7	23972.6	50295	26694.5	23223.3	18413.6	23129.6	20761	15452.9	20712.6	24202.9	22257.6	25598.7	22401.2	21540.6	21125.8	22422.5	20567.1	24668.8	25094.8	31438.7	27183.2	29675.7	29437.4	28761.6	30107.2	30347.6	27831.1	29206.6	23811.1	25518.9	32434.1	29391.5	30094.4	32483.5	28069.6
210	185.113	406.429	47145.4	46677.7	48925.8	48015.6	48705	49246.4	45449.6	6382.12	4975.02	6620.84	7022.36	6202.97	5890.84	10748	9675.63	9516.47	8266.93	9363.81	6918.46	6583.6	8552.14	10197.9	9879.98	9683.22	8993.43	8204.69	8548.04	8754.5	7355.14	5526.56	11079.1	10888.4	12811.7	12684.6	12371.4	12538.9	13218.4	13809.1	12650.1	13360	8741.09	13146.1	13687.2	11786.9	13182.7	14111.2	14726.1
211	185.108	451.139	41675.9	39769.6	42473.5	40355.1	38732.4	38538.1	39782.5	7212.42	6390.1	6230.27	7746.47	6712.91	6443.37	10785.1	7941.74	8436.98	8251.67	7702.18	8039.09	9315.72	8031.74	8807.45	8114.54	7707.88	8586.58	8164.21	17592.3	7992.24	10518.1	5137.52	10257.3	20789.1	21012.1	18445	20954.7	21104.1	18533.4	20523.9	19966.6	20334.3	8378.47	20734	19852.8	20087.9	20612.4	20270.1	20940.7
212	185.043	318.492	27587.8	25294.6	26677.1	27329.7	26454.4	27476.5	26437.6	8074.12	17750.9	23377.9	33124.2	12441.7	11634.4	25177.1	21881.3	25749.8	59390.7	17537.8	22976.2	17488.1	14477.5	17309.8	49237.2	15300.5	33458.8	22076.2	25112.6	43854.9	23326.3	11008	17085.6	13657.4	15598.6	123865	7451.1	49690.2	9972.53	11369.1	8501.59	7152.41	14019	24842	11012.4	7356.11	22434.9	30502.5	10946.2
213	185.151	488.421	10132.8	10531.8	10508.9	10676.4	11419.6	10307.3	12184.5	23778	23964.8	22028.5	22492.3	22694.1	30441	106604	23578.3	23526.1	21974.4	21817.4	20374.6	16803.4	19852.9	22850.1	20630.2	22199.3	22386.4	21305.3	17744.5	19144.5	23992.5	23077.8	20733.5	3924.09	3744.43	3574.09	3777.48	2249.45	4236	3934.5	3027.19	3783.21	19917.8	4047.94	3031.59	2658.25	3673.79	2905.3	4351.38
214	185.991	59.0315	11767	11602.5	13221.8	11982.5	11273.8	13572.1	12474.8	11234	18850.4	17924.7	19701.8	16952.4	15215.1	11820	10977.1	20735.2	23128.3	20738	36221	44188	13998.5	19439.3	18665.4	20267.4	19509.6	18155.7	36229.8	18099	62246.4	22744.1	12998.5	13205.7	12123.2	11670.5	10580.5	10041.9	11266.3	12381.1	10608.4	11171.4	55672.9	12279.2	11333.4	11409.8	14474.9	14474.7	11847.1
215	187.049	44.6533	32294.5	30669.8	29556	32498.5	30306.5	30738.6	29780.9	57859.9	89410.6	60742.7	56154.7	80240.6	63265.6	91459.2	81492.5	74613	126469	75717.2	115619	211800	58044.2	45699.4	45337.2	53024.2	52666.6	44303.9	167151	56903.2	124446	62403.8	43707.1	35226.1	30824.7	29122.5	24491.7	27807.3	31861.7	20733.9	22972.9	24964.9	136017	25943.4	21051.6	17998.2	19307	34931	28108.6
216	187.093	253.839	55338.2	52417.9	55633.8	56751.6	54195	53873.7	55444.7	60788	43901.9	45209.4	42845.4	40834.5	39043.7	34619.8	24433.2	16178.9	12974.4	12947.8	46204.3	11533.5	11599.7	11772.3	10588.8	11569.6	10825.1	10734.4	10524.1	10556	10189.7	48176.7	10534.6	6402.45	6441.49	6868.75	6263.78	6529.2	7544.19	5837.96	7039.25	5902.03	42271.4	7063.86	8718.08	6469.16	7297.44	5681.66	6875.99
217	187.097	295.113	163404	165753	165619	164721	168344	161691	167943	71589.3	47554.4	52799.6	45964.7	45159.4	48499.2	42050.4	32093.2	22343	19615.5	18851	57574.5	17136.5	17426.8	19038.9	17209.9	16851.6	15349.6	14355.9	14601.8	14787.1	14188.9	61422.3	15840.8	10788.9	9600.53	10859.8	11407.1	9977.57	9327.72	10618.2	10831.2	11950.8	57061.8	11567.5	10402.8	11266.9	10266.7	10742.9	10583.8
218	188.071	240.669	843369	828228	855665	861213	845414	858080	869300	1.17653e+06	1.48876e+06	925102	1.35846e+06	1.46247e+06	929220	1.86615e+06	1.87639e+06	2.64103e+06	3.39153e+06	1.56349e+06	3.97368e+06	3.9388e+06	1.43741e+06	1.18412e+06	1.51431e+06	944670	1.39388e+06	1.60581e+06	4.79619e+06	1.36598e+06	2.74096e+06	1.0367e+06	1.26671e+06	844474	1.04277e+06	786233	870351	824015	1.06155e+06	782193	890447	638627	5.11783e+06	876371	893119	924912	586317	713908	997239
219	189.074	240.67	100791	107005	108957	102136	105407	105271	110302	152442	182502	112894	167489	176805	114655	226554	225021	312285	388547	187818	466584	463386	175811	147580	186099	116305	170337	187748	542880	165834	329996	129112	153202	104623	124926	95922.3	107828	100723	133086	98463.8	110486	80637.4	596315	108126	110975	111857	70066.6	89754.3	120871
220	189.112	365.829	144721	143650	143085	143592	144765	141463	143202	7518.81	6157.21	7291.77	7600.66	7026.73	4309.2	8486.66	7562.52	10035.4	3571.51	8754	4400.13	2928.82	6072.43	8022.02	8948.57	4575.69	6656.93	4214.16	8344.96	6689.53	2956.09	5287.91	7041.23	2398.46	2170.72	2520.96	2803.28	2378.77	2739.38	2250.99	2483.69	2553.52	3834.33	2942.53	3012.01	2260.26	3889.91	3486.53	2073.66
221	189.043	125.305	14606.1	14390.9	14220.8	15341.4	15179.6	13053.1	14947	1356.14	929.796	847.129	991.326	835.792	1724.77	1200	527.255	1293.83	555.458	869.531	1202.34	936.682	765.519	463.983	521.023	685.135	369.704	135.458	1218.94	404.79	1104.04	1081.75	464.788	353.31	731.357	330.168	782.016	993.26	506.682	466.939	619.38	1306.82	1090.96	515.428	501.437	1219.67	696.695	600.043	396.074
222	189.159	38.3451	7713.97	5926.25	6715.45	6925.46	7590.45	6854.9	6325.15	10899.9	11087.6	8354.58	9238.56	10003.2	6491.66	30391.1	29582.8	16852.3	9874.18	13391.1	11156.3	43474.2	7366.05	5786.46	8710.77	6793.75	14089.5	9572.57	77081.4	32750.7	8041.03	8634.4	8025.16	6564.6	7745.62	9649.22	7657.62	5055.07	11414.7	7720.27	8413.19	16516.4	93620.8	3773.4	6290.49	4846.32	4123.03	5269.25	4946.17
223	190.102	256.41	22339.7	23751.8	25224.4	23929.7	23822.2	23752.9	24369.5	16455.5	9321.51	10392.6	10181.4	35963.7	8854.5	25441.1	25126.6	32500.9	39609.7	22345.1	45858.8	50709.5	19657.2	15317.4	19367.7	8809.82	10637.1	18609.6	60337.3	17642.6	31998.1	15178.2	16647.3	9683.64	12496.5	11002.2	9524.85	4439.39	11665	9697.02	11404.2	3008.9	58523.5	10431.5	11215.5	5346.14	2976.71	9611.14	13826.6
224	190.119	370.262	15738.6	16735.7	15430.9	17331.9	16505.7	17300.2	14901.4	4727.33	4992.57	3461.1	3961.21	3634.91	3597.05	6273.05	4771.33	4907.98	3050.8	2665.52	3114.16	2140.15	2880.17	4689.43	2861.73	3646.9	4057.84	4641.78	2029.66	3922.18	2370.55	4024.3	3206.03	742.291	639.741	635.706	871.937	954.115	224.42	1047.36	658.172	1289.67	4089.71	1539.58	617.315	721.681	497.581	617.24	907.158
225	191.05	39.4318	92958	93505.9	92914.7	95138.4	92986.2	95862.2	95764.4	104263	118022	133600	122394	130183	93718.2	167044	137779	150604	320847	123026	300386	429002	95080.2	111903	96326.3	107110	161900	123579	412760	122356	361122	117385	101893	89334.9	96639.7	96150	88133.2	97529.4	111449	89428.6	80691	90392.5	328464	82709.5	109186	82330.8	83819.3	94104.6	99024
226	192.037	41.3539	15245.9	15556.1	14985.6	15506	15537.9	15330.9	16516.4	17764.8	18494.6	20702.1	20638	18090	14458.8	25699.3	20683.8	21941.8	35112.1	18786	38040	46407.5	14728.9	14755.5	17895.3	17285	17745.6	20754.4	42035	16894.7	55052.7	18408.8	16564	10836.1	11541.5	14489.2	10714	8702.24	13839.1	11485.4	8029.82	13670.1	37546.6	10593.5	10770.5	8944.38	9547.78	9856.18	11980.2
227	192.137	492.591	7971.68	6732.18	9278.51	9362.83	8918.86	8139.75	9418.79	17059.8	16319.6	17156.7	16444	16237.2	17483.4	80325.6	18281	15889.5	16499.1	17354.1	15419.1	14285.4	15595	16004.4	15821.2	17987.4	15668.5	15073.6	16256.4	14665.1	19705.5	15458.4	15691.7	8609.46	7215.44	7420.47	7435.8	7992.62	7536.16	8539.08	7979.49	7389.33	18865.5	7845.16	8191.16	7317.5	8295.81	8838.38	8194.15
228	192.063	127.355	6663.01	6935.1	8685.77	7220.27	7284.88	7057.45	7321.59	8818.48	10965	12750.7	12479.7	8904.5	7226.8	18149.9	20615.6	20990.1	26589.4	14466.5	31589	35085.4	9733.75	7874.5	16923.1	7261.49	19227	11101.6	37318.4	14779.3	10561.4	9436.89	13029	4478.27	6519.96	5433.75	3925.94	5620.47	9439.59	4904.17	6198.17	4664.28	26690.9	7304.45	5175.14	3870.66	6921.53	4635.4	6046.74
229	192.121	325.414	10612.2	11064.4	10167.9	10597.5	10352.4	10242.7	10354.1	3043.82	3388.98	2942.49	2715.82	2757.49	3118.86	3560.8	2648.81	2218.62	3534.13	2423.71	2021.54	2367.57	1804.99	2484.95	2374.18	2388.88	1810.48	2503.87	2927.52	2047.2	3740.42	2052.2	2332.48	754.563	1100.24	929.938	1044.55	892.801	923.296	254.909	637.173	773.736	2990.56	586.643	570.254	1091.57	740.423	936.598	774.345
230	193.06	335.689	26749.3	26629.8	28382.3	27570.3	27282.7	28511.8	26733.9	48997.8	48434.9	45440.5	45054	46221.3	47630.9	240871	56259	54151.6	46616.3	59621.3	67835	78358.6	47456.6	45531.2	47709.6	53199.9	59778	47857.6	79245.6	63587.6	55314.8	42791.7	48929.4	26724.7	28748	25831.1	34803.9	30885.1	25060.6	24657.7	31221	35219.1	59519.4	25097.9	34332.8	34632.3	23108.2	24052.8	30797.8
231	193.151	41.3099	15606.8	13596.8	16027.3	13776.7	14994.5	16183.5	14842.3	10972	30830.2	41552.2	53133	22963.6	32960.3	95140.6	47546.6	18238.3	76505.1	32873.4	68835.7	91348.9	8371.95	25483.8	24578.6	30488.3	79847.8	39747.7	250615	160068	36841.5	47415.5	34773.6	18898.3	10331.4	35054.4	10551.7	19950.1	14887.8	6786.75	42951.1	49541.7	178611	10872.1	16504.8	24003.7	4682.35	8380.81	15149.6
232	193.157	500.474	5799.21	5392.09	4791.61	5734.82	5839.61	5765.81	4596.05	25438.5	25102.2	28476.7	24356.2	23802.3	27640.5	90536	26650.7	25406	22943.4	25726.5	26852.3	24592.5	21429.1	25077.1	24687.3	22887.8	26987.8	23516	24097.2	23263.9	21324.1	24214.5	24818.2	5778.85	5962.39	6885.33	5764.96	5927.6	5400.35	4964.03	6341.38	5709.57	21223.2	5659.83	7122.52	4441.26	8402.43	5579.84	5183.55
233	194.108	323.638	8845.68	10162.4	7510.48	8672.78	9188.12	9111.95	9440.3	9145.08	8819.95	9483.39	12006.9	6868.16	7717.45	27557	9292	9086.91	8486.56	7857.06	9399.72	7929.93	8047.03	6820.27	8844.54	7090.78	12695.7	10466.8	13644.8	8268.69	9285.34	10122.4	7949.86	20966.8	27153.1	34742.4	20450	14748.7	18092.6	17395.2	22248.5	34649.4	11869.4	22627.4	37337.4	24705.8	41837.1	23518.1	15872.1
234	195.086	266.571	42932.2	43331.3	44518.7	42543.5	47332.7	42721.9	43802.9	320854	20169	21269.5	19517.4	20652.5	23885.1	23139	24563.6	219797	50307	27536.5	476397	20042.8	16552.8	16352.6	20376.8	18395.1	17298.8	18463.5	18489.5	158552	407937	21604.8	17149.4	66093.2	14580.3	13726	13450.2	68134.2	20568	74869.8	144199	29628.2	29591.1	42080.8	78251	16805.6	54272.4	53404.1	526814
235	195.134	573.634	20091.2	20616.1	21675.5	21081.3	21504.7	20296	19779.9	32322.6	29767.4	34877.1	30953.9	31331.5	31698.3	89214.1	35156.2	29162.2	28247.7	25524.8	34895.3	31074.8	19678.9	26296.6	26904.1	27905.1	30836.7	26174.8	27253.2	23952.1	36533.7	35197.9	29287.1	16072.1	17850.2	18155.7	16036	17678.5	16011.5	16869.9	15188.5	22473.2	47139.7	17052.9	18729.8	19217.7	16166.1	20624.5	16812.2
236	196.866	40.9619	31234.8	32245.3	31272.4	32238.8	31814.3	32861	33800.5	38810.3	37967.5	37600.8	38447.7	42550.1	36636	51411.5	42717.3	44170.6	81156.7	37263.5	90698.8	76733.4	37244	37029.3	40859.8	34172	38901	33988.8	76377.7	37932.3	80201.8	35318.1	35303.6	31167.3	29124	31647.9	30111.2	31003.2	29592	28544.4	28165.4	32035.7	75038.5	29778.4	29911.7	36149.8	29319.5	26140.2	28330.6
237	197.101	328.757	39308.8	39640.4	36592.4	39526.3	38262.8	38827.9	41028.5	3046.53	4401.59	4065.66	3625.26	3770.84	3988.26	10745	4013.57	4494.59	4099.15	4737.67	5849.54	4503.16	4714.72	3509.65	4626.89	4157.02	4719.66	3663.93	7562.31	3828.43	6903.39	4472.49	4026.53	1395.08	1890.25	1450.68	1979.94	1080.45	1719.66	1282.92	1736.66	1372.22	6391.93	1114.05	2286.33	988.057	1608.44	2579.83	1659.08
238	197.154	635.341	12454.7	10905	10185.1	12476.1	10760.5	12111.4	10770.2	17367.2	15430.4	16502.7	13767.1	14610.7	17341.1	78884.3	18181.7	15195.8	9153.49	13789.7	23695.4	19294.1	6234.88	12774.7	12013.2	13764.3	13236.5	13414.2	17361.9	11208.7	27996	14832.1	14657.8	9065.04	9059.76	10660.6	10184.9	9790.74	10014	10084.6	10796.5	10130.3	20211.1	9947.02	9404.23	6995.91	10737.6	13717	8368.52
239	198.096	49.7421	22350.1	23229	21833	21232.1	21197.2	21391	21112.2	52268.1	56228.2	51091.8	58488.2	54866	58806.3	79490.2	63731.3	62812.8	104563	59680.4	109102	88280.4	58039.3	51228.6	55791.2	64142.5	50718.2	49656	51603.1	49603.9	106433	55954.4	70655.5	18262	17971.4	18042.9	20148.1	19757.8	18039.4	17030.5	17414	17947.3	97225.6	18058	19737.8	19576.8	16845.8	20713.2	19104.3
240	198.865	40.8408	30409	32319.9	31087.8	30654.3	32121.4	31193.5	33569.1	40198.1	39182.9	37384.4	39366.8	39255.2	39675.8	49705.5	44415.7	43767.9	108614	39915.2	86111.7	75405.3	38544.9	39349.6	40390.8	32907.5	36544.6	35465	77947.3	36074.9	79373.7	34914.7	33203.8	31773.6	30715.9	30550.6	29065.1	30659.1	29402.6	29454.3	29126.7	29919.4	77168.3	30107.2	30106.2	37178.5	28077.2	27444.4	27890.2
241	199.096	244.404	14490.8	13625.6	14248.7	13290.4	13021.3	13514	15360.8	2471.21	2214.01	1764.27	1861.93	2894.34	2579.36	5374.59	2181.25	2496.81	3344.6	1847.51	3851.48	2927.31	2413.01	1903.1	3128.59	2754.94	2451.39	2211.44	3568.58	2550.71	4637.83	1968.79	2475.94	605.588	944.778	1003.25	838.307	1594.51	748.727	1199.26	1241.69	678.851	3478.28	653.166	1762.66	2390.99	805.548	1089.34	598.308
242	199.133	442.968	41412.8	41184.5	41554.5	40392	42109.9	40278.7	41965	2611.61	2287.72	2982.1	2636.34	2972.47	2065.92	7814.07	3745.09	3104.02	4920.93	2298.72	3969.45	4397.12	1036.88	2683.24	3698.3	2886.03	3522.59	2795.73	7300.01	1656.88	3950.85	2182.84	1538.81	2988.37	1410.9	2027.74	1917.28	986.603	2096.34	1196.22	639.252	2422.16	5381.8	2842.16	3448.44	2074.72	2230.34	3280.81	1434.22
243	199.143	538.299	13906.1	16868.4	16021.2	16194.3	15019.1	15391.4	15730.3	22785.1	23540.4	20735.7	21229.8	19517.3	21153.6	100245	22170.4	20027.5	17088.4	28685.5	21743.9	27079.8	17895.4	23162.4	23755.2	19258	26637.5	21937.5	25895.6	19084.8	48064.3	22964.6	19945.7	1871.34	2799.7	1291.13	2602.35	2046.35	1934.4	2245.23	2281.14	2354.01	34116	2324.21	2289.38	2864.09	2319.65	3020.89	2800.07
244	200.05	237.893	210261	208853	211862	213740	213571	216716	215838	1.45366e+07	1.36059e+07	1.46302e+07	1.37254e+07	1.37364e+07	1.35934e+07	1.74228e+07	1.5064e+07	1.52311e+07	2.70198e+07	1.46963e+07	2.93676e+07	2.841e+07	1.27873e+07	1.36505e+07	1.41275e+07	1.28722e+07	1.42802e+07	1.33643e+07	2.826e+07	1.34675e+07	2.90653e+07	1.29151e+07	1.34517e+07	193839	188172	221165	279736	331808	227396	235660	193063	217871	2.68464e+07	189622	224863	272066	206589	216351	216945
245	200.883	40.8734	10581.6	9499.38	10447	11223.2	10394	10517.4	11105.7	14217.9	12035.1	12587.8	13870.6	15906.5	12828.1	18576	12552.9	15099	31649	14130	28185.1	25193.8	11853.8	12387	14078.9	11098.5	12656.3	12149.2	27519	10492.1	24665.8	14221.3	13014	11160.5	10387.6	10653.6	11700.4	10916.6	10459.6	11145.4	10103.6	10451.9	25059.4	11265.3	9848.09	11922.5	10482.3	10154	9763.17
246	201.052	238.214	27960.6	25712.2	25567.4	26655.9	24732.1	27452.1	26384.4	1.39174e+06	1.27907e+06	1.3785e+06	1.29414e+06	1.28397e+06	1.29224e+06	1.71154e+06	1.44283e+06	1.4548e+06	3.11133e+06	1.40248e+06	3.49791e+06	3.34525e+06	1.21864e+06	1.29982e+06	1.33398e+06	1.20445e+06	1.36116e+06	1.2546e+06	3.31448e+06	1.27226e+06	3.39879e+06	1.21047e+06	1.26393e+06	27143.8	25399.3	26691	33635.5	38029.5	29265	29070.7	24762.6	26019.1	3.08755e+06	25648.2	26970.9	32083.2	25677.8	28670.8	24822.7
247	201.112	328.79	244662	248803	245594	247403	254427	248081	257412	16007.2	15579.3	16377.6	16396.8	14672.4	16840.4	20489.9	15807	16317.9	14845.5	15256	15836.7	15499	15018.2	14655.1	13664.2	14465.4	16287.9	14288.4	14759.8	15256	16510.6	16725.3	14072.8	4414.44	5466.14	4829.25	4962.15	4104.46	5860.48	4402.51	3916.39	8713.85	15550	5009.27	3990.65	4355.33	3483.65	4388.84	4108.87
248	202.047	237.646	69959.3	67921.8	70979.3	70699.4	73068.5	71816.6	71649.5	4.57456e+06	4.26697e+06	4.64127e+06	4.31055e+06	4.24599e+06	4.22008e+06	5.69321e+06	4.75581e+06	4.8137e+06	1.01708e+07	4.64982e+06	1.14025e+07	1.0868e+07	4.00094e+06	4.29318e+06	4.42204e+06	3.98168e+06	4.47063e+06	4.14159e+06	1.0857e+07	4.1936e+06	1.11691e+07	3.95824e+06	4.20123e+06	65071.4	66632.9	71993.7	89142.1	108207	70436.3	72594.8	64906.2	71220.9	1.00878e+07	62550.2	73075.3	88767.4	71545.9	71631.2	69804.7
249	202.119	327.987	32523.3	31595.7	31009.7	33898.8	33252.2	32534.5	33250.8	6218.14	7367.89	6957.69	6681	7377.47	5664.53	14980.4	9585.1	10372.5	7022.61	9230.54	5442.53	4469.55	5388.41	8924.63	6164.56	4884.7	10275	6927.97	5999.51	6335.04	7001.18	4896.72	5876.07	1884.6	2863.54	2280.29	1539.75	1774.77	1570.79	1630.28	1047.14	1518.98	4854.57	1370.09	2301.35	1794.51	1603.53	708.705	1012.73
250	203.053	41.7132	1.20239e+06	1.19809e+06	1.23084e+06	1.2126e+06	1.23203e+06	1.23526e+06	1.24478e+06	1.21992e+06	1.40668e+06	1.21137e+06	1.39785e+06	1.41658e+06	1.25957e+06	1.82529e+06	1.65392e+06	1.72542e+06	2.39374e+06	1.42797e+06	2.58113e+06	2.47196e+06	1.36079e+06	1.17922e+06	1.23824e+06	1.35294e+06	1.43307e+06	1.22134e+06	2.19885e+06	1.29265e+06	2.76271e+06	1.35692e+06	1.61841e+06	1.07127e+06	1.06343e+06	951462	1.09524e+06	1.10048e+06	1.02501e+06	1.01826e+06	942417	919502	2.45135e+06	965022	1.11801e+06	1.17613e+06	1.04935e+06	1.09988e+06	1.18322e+06
251	203.048	238.284	11687.5	12310	12073.6	12283.1	12448.5	12153.8	14060.2	450753	415325	445291	420011	419592	412003	541878	461558	475719	964725	447814	1.07148e+06	1.02557e+06	393883	412319	433340	389374	434170	414383	1.01875e+06	408750	1.04804e+06	390121	407727	11073	11001.6	13511.7	12940.5	14645	10706.1	12184.9	11121.1	12721	953085	10071.3	11485.6	15212.4	11703.5	11034.8	13191.1
252	203.107	680.293	58244.6	60406.8	61698.2	60583.3	64748.8	60032.1	64381.2	66452.6	72050.4	72112.4	70700.8	74631.2	72314.6	280505	89100.3	77596	54619.3	47109.7	59903	43454.6	30416.6	57786.7	48068.5	48866.5	53984.9	46208.2	45892	57067.8	50352.4	68661.9	48820.9	57005.1	53973.8	57247	55169	55413	55354	56275.1	57028.9	54824.5	48833.7	57941.4	53133	53300.5	58735.6	58133.3	56392.5
253	204.123	308.142	73846.7	68612.6	72854.7	72834.1	78531.2	73085.4	73597.3	4050.11	3332.67	2430.23	2760.23	3148.18	1677.96	4392.66	4714.03	3502.02	2784.69	3493.86	4134.82	4877.82	2950.28	2782.26	2886.21	2064.55	2595.43	2531.25	9212.03	2745.56	6033.09	2691.57	1573.75	724.978	1784.06	2457.37	2396.84	1082.4	1522.32	1683.21	1483.12	557.866	4848.98	1058.24	1472.62	1290.86	1585.71	1291.98	898.848
254	204.11	44.9561	581855	574279	573229	587795	600769	583291	589285	265333	160377	318861	185469	242459	271262	361139	334194	249457	603004	240864	675195	594370	276418	212908	303498	415509	425380	167758	444691	270774	1.09412e+06	241013	486785	349896	400754	341821	567952	442078	387883	623880	366343	652852	597271	363364	370494	309872	572872	573118	444736
255	205.016	126.035	51609.6	53457.1	49954.1	52943.6	51631.9	53324.6	50908.5	790.109	1275.45	773.549	782.966	494.584	1423.2	953.513	1168.37	614.84	1404.42	1049.47	1935.93	1181.71	896.517	1610.56	1061.68	1218.8	1064.45	362.042	1863.07	1186.87	1737.82	1219.69	826.529	873.045	924.737	1264.57	1134.95	1172.5	1227.97	1130.22	1587.44	2454.19	1713.74	1214.14	1115.58	1410.16	1804.96	1136.68	1543.72
256	205.099	240.672	1.52753e+06	1.51475e+06	1.53352e+06	1.54688e+06	1.54243e+06	1.54454e+06	1.56886e+06	2.11368e+06	2.64404e+06	1.63306e+06	2.48321e+06	2.59362e+06	1.63127e+06	3.36702e+06	3.36867e+06	4.76069e+06	6.02672e+06	2.81611e+06	6.95443e+06	6.9445e+06	2.57408e+06	2.08463e+06	2.7072e+06	1.67096e+06	2.44627e+06	2.83783e+06	8.45229e+06	2.43616e+06	4.87847e+06	1.85507e+06	2.24306e+06	1.50681e+06	1.90505e+06	1.4115e+06	1.56135e+06	1.47353e+06	1.94796e+06	1.36962e+06	1.61024e+06	1.13332e+06	9.06244e+06	1.55792e+06	1.60934e+06	1.64397e+06	1.00635e+06	1.25222e+06	1.78592e+06
257	205.027	58.0234	11552.9	10959	11475.5	17015.6	11797.2	11581.1	16765.9	22859.5	27257.9	25579.4	30247.5	32815.2	31898	24997.2	30987	29034.8	31247.3	28002.8	32006.9	19964.6	23573.5	27635.1	29341	45286.4	25351	30539.4	22715.2	23154.6	18817.2	32564.2	17574.9	12895.1	12534.4	12483.1	12036.5	6093.37	10763.7	23360.9	13554.6	34651.9	20850.6	14033.5	14209.1	22159.8	25655.5	19575	13262.7
258	206.101	240.672	187794	190444	195143	194313	193443	196093	199462	266795	322854	202388	302608	311921	204113	408630	414951	579712	714207	349774	825118	817177	317039	262916	336811	206545	308176	347442	971985	300945	581672	234038	278363	191855	234789	180968	195465	188965	237613	169833	200597	143707	1.05069e+06	192406	202053	205174	128641	156760	224974
259	206.139	366.148	207143	207288	199460	204269	205578	206158	208012	4749.87	4861.19	3262.23	3447.25	3598.84	4890.87	11068.2	4618.68	5315.11	4214.88	4166.07	13583.4	5917.83	2936.32	4477.7	5183.35	2791.19	2856.6	3719.49	11775.5	3914.54	6144.58	2834.9	6660.09	2269.27	3186.44	3624.52	2446.87	2043.67	3386.25	2373.89	2154.82	3737.46	5406.42	1879.81	3996.37	3338.9	3510.73	3400.09	2163.54
260	207.102	240.686	16261.7	16853.4	18312.2	17970.7	15754.5	17527.4	17927.6	21754.9	25318.8	17156.7	25532.9	27885.4	18619.9	37464.7	34050.9	46278.9	57289.8	29088.8	65520.9	71554.2	29610.7	20404.3	27066.9	17121.9	23956.5	30227.6	83918.9	24769.6	48907	19262.8	25347.9	17841.3	21333.9	15799	18584	16544.8	20911.1	14625.9	18051.6	15108.1	89911	19483.9	19270.8	20104	12063.5	12326	20604.6
261	207.046	513.936	3411.81	4609.15	5174.16	5894.95	6619.26	6215.11	6483.95	109850	78822.6	113886	104806	117387	117100	148064	117524	168058	20123.9	126491	12139.4	9741.32	90424.8	103925	120522	67723.8	127008	117610	8931.84	97049.1	10027.1	80850.2	85035.1	1668.23	1294.22	607.518	1092.35	1448.41	1471.62	1433.24	1038.41	947.22	10942.5	1553.66	1432.46	4536.81	1335.15	1171.09	1529.99
262	207.205	38.8659	13157	11228.4	12222.9	11655.8	11575.1	12284.1	13197	76069.2	143208	92528.6	131948	156317	97666.2	162208	157625	224142	236681	143998	125612	192575	99969.8	142094	116813	74725.3	143162	127413	208594	132220	117590	114494	80331.3	32022.5	30208.6	19285.7	26768.5	9032.96	23640	15137.9	15620.5	15679.9	207204	15942.8	39732.8	52858.6	17747.1	19863.6	20182.8
263	207.142	367.187	25254.3	24823.4	25902.6	26448.6	23949.4	25374.7	26732.5	10378	9342.35	8201.52	8687.83	9942.08	6648.75	38124	10145.8	10461.2	11087.3	8529.98	13336.5	10734	7509.22	8816.91	9099.74	8733.98	8728.93	8554.69	12813.9	7839.02	11857.3	8291.13	8693.21	4647.15	3550.72	3963.13	4444.68	4090.56	4216.26	3214.99	3136.66	4405.8	13006.5	3314.83	4254.56	5076.47	4282.63	4498.51	3788.55
264	208.208	38.809	1444.28	1429.11	1624.79	1558.69	1556.69	1919.15	964.192	8961.69	16328.9	10183.4	16083.6	16828.3	10118.6	18463.2	18725.9	26630.6	26340.9	17914.6	16392.1	21174.3	11681.2	16414.5	12782.9	8345.28	16592.9	16111.7	24104.1	15243.1	14044.4	13943.6	8916.55	3397.89	3836.6	2312.4	3385.71	1512.8	3044.37	1496.11	1030.53	1904.15	24122.4	1643.25	3811.06	5991.06	2658.76	1605.88	2350.73
265	208.895	39.0135	14230.8	14229.4	13317.6	13153.6	13945.6	14139.4	12299.5	27672.2	28160.7	26465.6	27193.4	28950.4	25172.7	35845.7	29274	34677.7	64987.6	27482	64371.8	62953.4	24129.4	27172.2	29004.5	22109.8	27084.4	26354.9	66128.4	24470.9	61045.7	24813.3	20801.1	12364.7	14224.5	13187.4	13277.5	12268.7	13174.3	12929.4	12034.4	13653.4	64864.8	12612.8	12541.8	17521.9	12535.4	10797	11620.8
266	209.12	549.65	18686.4	20480.4	19158.8	18368.7	19436.6	20027	20068.3	30460.9	20544.5	26540.6	26141.5	15727	23464.3	48338.5	40635.6	58338	84701.3	66332.8	232936	98614.8	28819	39238.9	41688.7	17687	42776.9	27711.7	103204	91172.7	134643	26483.2	26021.1	23189.3	24578.2	24410.5	12808.7	23973.7	30624.6	13773.7	29197.2	29300.2	257773	13811.3	18262	33844.3	13240.1	14284	31512.8
267	209.079	308.091	71106.1	68947.6	69221.9	68858.3	70113.3	66812.6	71650.3	7674.73	6336.01	7016.02	5768.05	6363.27	5558.17	11087	7578.01	7140.05	9509.97	6187.38	8844.74	8665.58	6578.4	6603.94	6225.82	5589.1	6644.46	5663.53	9818.53	6127.93	11441.1	5099.18	6252.4	2387.68	1807.4	1667.74	2331.06	3088.11	2250	1699.58	1378.42	2208.92	10264.9	1805.22	2348.22	2227.82	2512.86	2583.56	3069.18
268	209.116	124.524	59690.3	55398.6	57375.7	59527.2	60197.4	56961.6	57028.6	50455.1	56869.4	65081.2	61574.3	66955.2	35038.9	104578	113546	112641	142387	74036	166941	192968	52277	42995.1	85447.3	40750.8	100897	60662.5	221697	74693.9	98181.1	45604.3	67304.6	28838.2	37172.8	35583.6	22024.4	37723.7	53821.2	33348.9	39809.9	30803.1	154114	52523.5	35704.3	25876.6	41314.8	30795.6	33480.3
269	210.061	61.5281	11137.8	11974.9	11099.8	11604	12368.2	12010.8	11772.7	32841.4	34624.9	38473.1	27868.9	41577	58006.3	43160.3	70867.1	38537.1	132166	25462.3	202699	128726	29579.1	51948	49934.6	31141.2	43399.4	35173.5	63030.2	30599.7	203616	24440.2	48228.2	11317.7	8700.77	7511.77	13020.7	10072.9	7929.77	18544.8	7586.93	17443.4	168911	7606.58	13271.8	14527.5	12326.6	13345.3	10408.8
270	210.101	307.362	9315.11	9837.25	8178.11	9749.72	10943.4	9423.18	8152.93	4085.1	4061.3	4960.71	4329.37	3871.04	4561.56	8323.04	4298.92	5880.75	6488.44	6054.46	6709.18	6551.87	4366.35	5759.04	6161.71	3649.38	4509.75	5723.24	18912.5	5370.8	8213.28	5950.51	4438.63	21890.4	32545.9	46072.7	26606.2	12650.5	22960.2	19705.4	27849.9	37357.1	6758.43	21876.6	61041.9	24684	57656.2	22071.8	18748.1
271	211.065	317.851	22006.2	22320.6	21464.5	20408.8	22144.1	21465.3	23918.2	47279.2	46419.4	50537.7	46102.6	50458.7	40997.3	144872	52417.7	46741.1	48114.7	44136.7	50872.1	42600.8	44205.2	50045	42767.4	43104.6	46587.8	46158	46673.1	49397.4	74317.1	45806.3	42935.9	27479.8	25095.5	23658.8	27542.9	25954	26086.7	26084.8	29517.1	24199.3	61068.8	23727.5	33117.2	23662.3	25913	24487.4	25671.6
272	211.095	365.918	231066	229015	229555	224674	225493	233771	238293	8179.47	7975.82	7510.19	7721.29	7119.49	8576.83	25564.2	7460.81	9527.61	7046.98	7686.22	9524.9	6042.62	5970.83	7626.94	7173.61	7428.41	8174.36	7487.92	13263.4	7107.68	7561.74	7289	7295.58	7686.87	6382.6	7838.7	6531.56	4728.67	6178.21	4724.16	5561.68	5491.34	7115.5	6380.84	7137.8	6216.19	8863.04	9151.16	5861.05
273	211.168	500.014	5769.06	5131.88	6693.87	5538.52	5660.7	5720.94	5182.82	29684.4	31859.4	29908.8	29487.7	28938.5	31715.7	103332	31508.3	33962.8	27134.5	29194	48692.5	35029.2	25896.9	27901.6	30472.6	26305.1	33354	28796.4	25948.4	28976.8	29832.5	26679	26179.7	9542.94	8978.14	9818.55	6151	6430.15	6570.62	6021.74	7045.81	6047.26	26068.2	6488.41	8926.35	5351.73	11126	5105.82	6411.95
274	212.099	366.131	26299.2	23317.3	23179.7	23664.9	25983.4	23956	25552.8	1853.71	1566.3	2398.36	1297	1430.17	2149.02	5419.37	3206.61	1874.73	3024.65	1686.47	2183.49	1487.88	2285.68	2389.69	1579.73	1340.33	1707	1661.65	3792.83	1774.93	2676.59	2543.05	2083.13	256.124	1532.22	1203.02	711.925	1504.36	1445.41	1514.53	1211.94	705.68	2397.09	812.276	1364.09	1646.09	1486.63	2223.95	1366.84
275	213.088	254.206	31327.1	29741.3	38894.7	29981.4	38795.8	30453.4	33167	3295.98	3007.65	3353.66	4826.35	4495.7	3016.66	8578.69	5273.58	4796.25	7525.94	4238.35	5007.53	5339.22	2914.37	3632.78	4571.05	3437.25	5576.78	4185.22	6574.3	4001.76	5538.72	3393.04	3466.67	1771.37	1741.99	1559.5	1771.08	1343.21	2074.99	1426.18	1190.46	1326.3	6601	1398.51	1057.01	1156.41	2218.59	1332.52	2455.23
276	213.16	578.011	9582.87	12036.8	12119.9	12194.4	11248.7	11701.6	12690.7	26103.8	21927.6	26813.2	23672.8	24110.7	24697.1	99291.6	25443.5	24774.6	14413.2	30794.7	21969.4	18444.1	9920.56	19787.6	23842.9	22730.5	22190	23168.5	20552.6	15954.7	17958.5	24820.7	32412.3	9964.17	9815.38	9220.88	9519.28	10829.3	8222.01	9549.93	9558.23	9898.56	19066.6	9317.64	10033	9270.5	8965.19	9577.35	10198
277	214.013	41.1395	6247.97	6083.66	5940.33	6706.93	6587.46	5062.18	6468.37	10042.5	7668	10659.4	8037.69	7268.86	5770.85	10858.5	9816.64	11577.2	7096.08	8458.38	11534.2	11200.2	5307.31	6247.74	7402.27	7292.78	8556.9	10062.6	12446.5	8669.46	16103.8	8152.43	7668.77	6450.57	6099.11	4368.23	5869.79	3786.31	6850.12	5265.8	4422.46	6393.46	11088.6	6108.75	4273.41	4198.76	4986.56	5995.64	6550.63
278	214.179	460.303	3776.78	2838.73	3631.28	3328.01	3767.44	3973.09	3801.44	12034.5	17010.2	13001.5	11659	11032.9	18256.2	31236.3	13582.3	13162.1	23949.7	13682.7	14662.3	17027.2	8844.14	11000.1	8373.7	14283.2	25175.7	11424.3	17582.2	10634.5	29267.1	10493.4	11550.8	12692.8	5168.73	4093.64	4777.98	4285.85	7186.68	4825.54	3807.15	3961.54	14265.2	6802.94	6050.21	7345.78	7568.58	3932.45	6556.89
279	215.016	60.7369	23992.9	25632.4	24256.4	23430.8	23826.1	23966.8	23554.6	32588.8	38374.8	44601.4	33059.7	50045	60374.8	60761.5	81775.5	52797.1	234623	30240.3	269083	198564	31640.3	61813.2	56297.5	32037.4	52427.4	37913.6	128002	38531.9	269713	27460.2	58650.2	22726	22835.6	20547.5	30218.6	19759.2	18023.1	38414.9	15762.2	39221.7	244817	16589.9	32181.7	38595	24457.7	25851.3	24658.5
280	215.128	367.497	288996	287342	293609	286424	291138	288098	291300	4648.71	3975.44	2982.13	4049.59	3275.09	3044.55	6587.42	4976.79	4333.27	2844.73	3223.4	5227.91	3827.49	2217.35	2774.21	2557.1	3239.99	3716.34	3790.94	5044.5	2760.86	5289.61	5361.79	3786.76	2075.01	2545.66	2061.03	1835.42	1969.46	1201.8	2187.62	1708.68	3898.64	5237.96	2433.45	1927.37	2050.32	2043.04	1039.48	1283.9
281	216.135	368.766	42350.8	40451.8	40494.2	40686.2	40454.3	40550.8	41891.6	2150.35	1775.93	2135.5	1556.62	2959.7	1937.32	5964.46	4276.08	4706.71	1994.73	2968.54	1549.1	1151.8	2144.95	4352.01	2444.28	1664.15	3747.53	2545.63	1855.47	2864.33	2082.72	1455.85	1411.69	10727.9	341.812	7873.48	800.559	1830.08	716.295	903.468	908.105	471.551	468.633	8402.97	842.865	1536.03	8464.51	122.338	741.311
282	216.924	38.413	126936	123518	123113	127569	126739	128742	129236	197302	202352	193595	201446	208483	186236	240169	211642	224317	259899	197868	258867	258614	188925	195911	205388	170797	192565	189839	254721	193189	243588	183326	172282	129114	125571	127332	118284	124157	122385	120464	115784	130497	245914	125528	119031	145669	120469	113733	115372
283	217.135	445.083	16168.1	15422.3	16156.8	16036.6	17866.5	18281.2	16868.9	5326.57	4256.03	5011.91	4051.43	5727.17	4644.79	7623.83	5133.58	4496.74	3372.99	3125.82	5738.41	3776.51	4016.11	3309.86	3626.05	4836.8	3370.85	4203.13	4539.16	4512.06	3680.16	4455.97	3788.56	5674.23	4810.05	4664.69	5428.28	4614.5	5174.95	5938.1	6065.19	6065.26	4592.98	4669.37	5144.98	6291.15	8487.3	5577.08	5482.38
284	217.091	277.371	44984.4	46559.1	44406.6	46692.2	47238	45503	45476.6	11573.6	5538.19	4697.85	4909.01	5474.22	5474.41	7835.02	5807.76	10806.8	8968.04	5804.23	22591.2	13485.2	4687.06	4353.93	4286.49	5442.52	4559.62	4051.07	15437	7687.1	18916.5	5798.95	3680.11	24400.1	24806.2	24168.1	23071.8	25340.4	23541.4	23189.2	23456.6	23310.3	13449.3	23355.4	22549.9	23385.7	23801.2	22178.6	23343.8
285	218.138	84.7647	49210.7	47196.4	51011.2	52031.4	51217.7	49459.7	51362.5	48548.1	39661.7	72680.4	55674.2	40423.6	31438.4	109221	57155.3	62227.7	134679	57196.5	184746	367589	32154.1	30849.9	52729.7	50700.5	72620.8	60913.4	195324	69630.9	101971	98526.6	41192.6	34231.9	38341.5	44906	31077.5	40047.9	70636.2	36473.6	51416.5	47492	172426	35500.1	41590.5	37919	23304.2	48899.6	54201.5
286	218.139	450.691	11563.7	12180.8	11986.1	11851.3	10527.2	12002	12939.3	393.275	1065.63	965.631	1046.73	1239.29	742.24	3143.99	1001.59	684.62	1085.79	534.782	948.507	1460.72	319.885	957.72	794.714	572.588	851.602	475.84	632.83	1008.07	906.932	841.943	850.139	356.352	364.034	433.634	568.273	720.6	0	252.601	216.337	617.777	1308.26	351.685	559.834	461.648	692.041	221.914	624.235
287	218.137	309.033	14428.7	15552	16512.9	13057.3	15218.4	15724.5	15321.5	1467.42	1760.64	1341.41	1622.91	1274.09	2001.53	3258.15	1485.67	1888.05	2849.46	1901.72	1901.1	2949.33	1829.21	1849.98	1340.83	1569.48	419.031	1069.37	3807.13	1171.36	1781.62	1365.58	1244.22	1585.42	1453.02	1689.11	1689.78	1253.56	1459.27	1093.14	2013.86	1368.35	3891.25	1933.59	1914.86	1408.32	1964.53	2079.48	1071.83
288	218.21	372.946	23030.3	21913.2	22418	21572.6	22453.8	22398.1	20870.3	67594.2	110929	84499.3	65726.3	85362.8	54909.5	99959.8	85670.4	78026.3	379605	59899.1	136692	175897	76190.6	56548.7	80310.1	69439.5	70744.9	76636.8	118490	48757.4	130403	40477.6	56180.5	28437.9	22413.7	33108.1	31197.9	15510	45570.5	47529.6	16045.7	49856.8	148427	25142.5	21240.9	24966	39272.8	36504.5	38075.5
289	218.996	40.5664	101944	98605.4	102661	104980	104287	105567	104762	132645	139390	124643	138765	153103	136489	178241	161730	160874	230401	149899	242205	214685	133979	132566	136874	133491	144708	131632	217638	132719	235562	130918	156122	94307.4	90590.3	93582.9	86223.1	87189.3	90281.4	93157.4	92902.5	87526.7	224853	91919.6	108397	103175	90127.7	87451.5	95757.5
290	219.123	334.5	181739	178006	185132	181447	187967	182197	180019	2346.99	1383.9	2746.83	2067.15	2803.23	2716.53	4329.11	2532.13	853.037	3354.24	2469	2853.83	3572.79	1515.1	2322.42	1850.4	2828.66	1522.45	2502.67	3781.05	1660.14	4033.5	1477.02	1233.8	1862.41	1081.67	808.014	769.873	472.293	1106.31	663.265	788.093	1034.87	4206.26	1313.52	1033.15	874.431	908.538	642.704	722.494
291	219.174	693.451	10156.5	10353.3	10869.3	9760.53	10610.2	12811.4	11476.7	11628.8	15405.9	14125.5	12639.7	13466	13970.2	46439.3	16376.9	14883.8	10031.8	10928.1	14799.9	11911.8	4347.63	12096.1	12095.6	10939.4	12511.6	12495.2	12043.7	10962.5	12035.3	13074.6	10283.1	9419.53	11423.8	10784.1	10763.6	10568.3	9500.44	11899	12768.4	10639.8	9052.16	10806.7	11047.7	9291.61	11387	10399.6	11755.1
292	220.03	41.9576	13667.9	11660.1	12280	10868.3	10726.3	14411.4	11187.5	12248.9	13318.8	15632.3	14566.7	13781.2	11502.1	18375.1	17030.1	27050	55110.2	14669.7	47512.5	46593.7	11733.9	14089.1	12368.4	13548.2	15643.3	12847.5	39962.2	13303.6	51943.9	13170.2	13616.4	9774.54	11172.9	10154.7	12292.5	9142.57	11607.6	11364.2	10177.9	10561.7	42776.9	11024.5	11833.9	10574.1	9190.85	8922.4	10729.5
293	220.154	407.497	13579.9	13964.5	13323.9	13971.6	14746.8	14175.5	14195	673.697	214.588	356.065	696.863	630.095	626.553	2037.06	506.428	687.765	875.495	635.806	667.023	717.678	113.961	696.213	894.674	801.033	513.549	571.707	2078.12	346.225	1205.6	273.77	877.287	0	529.968	325.955	304.13	107.67	357.136	370.363	131.997	606.567	1990.65	353.656	532.132	0	807.083	376.47	222.131
294	221.119	690.276	24954.8	25944.8	25633	25823.1	25449.7	26308.8	26179.2	32457.2	37882.7	39699.1	35288.4	37570.5	38298.8	136056	46989.3	42521.3	32945.2	33534.5	37674.9	25559.1	13952.7	26450.4	28710.5	28730.9	34790.5	27791.5	31560.8	30102.1	29818.9	35840.2	25553.8	22374	22924.6	24822.3	21844.9	22206.2	19430.6	24114.6	23652	24632	31440.9	24257.6	22919.9	23403.9	23038.4	24707.5	23778.1
295	221.014	39.3725	14094	13696.1	19445.8	14212.8	13455.8	13646.8	14333.9	36931.7	54736.1	34683	53273.8	52582.3	42747.1	51225.3	57358.9	78558.8	88005.5	50216.9	58361.3	64608.6	45571.9	55164	45098.8	32271.7	49373.3	47671.9	66402	48078.5	53465	40903.6	38112.6	19715.7	19721.9	18981.4	18174.3	12996	16514.8	15819.3	14615.1	15162.8	59857.9	16207	21990.7	26928.3	16900.7	15194.6	17081.5
296	221.154	657.73	7055.91	7457.65	6452.08	5981.31	4918.33	7821.33	7336.25	58423.8	50586.7	59316.6	49369.3	47680	56034.5	706408	62735.2	43687.1	19115.9	31562.3	58972.8	31061.6	19062.1	30939	29765.2	37755.4	36659.6	41515.1	36535.6	31146.1	52016.1	52014.3	36190.8	3954.63	4428.22	4400.91	5196.7	4841.24	4332.15	4605.25	4821.5	4988.8	51282.2	4491.48	4199.09	4752.15	4631.69	6200.39	5270.42
297	222.03	237.822	1156.88	1311.38	1539.77	878.845	729.346	1195.26	914.848	90978	80169.3	91330	83990.5	78617.3	92254.4	120824	97173.8	89767	232219	104633	168338	172722	94682.9	99315.6	100226	107922	105130	99469.9	159067	102527	190550	80076.7	100354	954.058	550.695	1046.12	1562.72	1803.64	1133.88	1355.16	748.548	894.65	126866	1087.91	2278.79	1433.34	1358.67	944.3	1405.36
298	223.097	471.725	113171	108561	104467	111633	109350	111953	109359	75327.2	114888	11026.7	92497.9	51069	88948.3	322532	286491	324563	212822	276806	1.00235e+06	840553	145177	131543	300465	130688	286236	235213	637370	609193	807200	108760	195889	102103	146221	49588.5	112522	132819	171591	46140	132769	184361	832487	47595.1	148668	147911	45620.5	40327.1	121599
299	223.155	271.405	5036.78	5991.4	5189.26	5544.56	4558.16	5626.54	5806.16	10304.8	15146	9764.85	13112.1	23450.5	8582.86	15659.8	15289.3	19921.2	27877.4	14269.7	27793.9	55835.8	15075.3	15768.6	14761.7	18357.4	15137.7	16480.3	55272	13078.5	67268.1	12051	10863.7	7143.29	5196.31	5428.59	6315.68	5822.36	9005.77	4892.63	3650.43	4905.29	45377.1	6807.95	3579.69	5202.16	5876.01	5915.14	5014.88
300	224.099	470.792	13498.2	14310.2	13652.6	15312.7	12826.8	13279.2	13829	13133.1	17113.9	1929.57	15180.5	7107.17	12197.3	39886.3	36334.7	41381.5	28035.6	36610.7	133838	107756	20381.8	18524.2	39506.6	17980.3	37560.2	30750.2	87791.5	77731.6	106240	14590.3	25434.9	14267.6	18548.2	5938.71	16164.6	16627.8	21069.4	5891.47	18285.4	22709.4	106396	6641.32	18387.6	20337.4	6038.41	4847.39	16554.5
301	224.032	237.346	1728.65	1431.56	2553.41	2317.59	2244.72	2062.82	1993.07	28736.1	29577.4	30538.3	29162.4	28730.5	30662.5	38758.5	31600.6	31353.7	70926.6	37103	56835.6	54074.5	29011.4	37011.6	33032.8	34711.2	34416.9	31658.6	50295	31927.5	59277.6	26048.8	32481.5	1808.09	227.892	862.346	1650.19	991.018	865.661	3088.57	818.62	1122.69	47571	1748.16	2195.69	1663.09	2534.83	903.4	498.899
302	225.034	39.9744	21330.6	22361.8	22048.9	22555	22115.2	22071.9	21158.3	19737.7	18553.3	17278.7	18917.3	20565.4	17448.2	25376.8	24346.3	27278.3	34048.6	19709.9	31157.5	32546.3	18344.3	17282.1	17737.3	18737.6	20157.2	17910.9	27956.5	19382.3	34171.5	20034.8	22588.6	19292.4	19484	16536.5	20626.4	19903.9	18928.1	18919	17454.7	15083.5	29906.7	17221.5	20451.7	19218.6	19808.4	21045	20312.7
303	225.083	515.238	12586.7	12940.8	12929	13438.8	14545.7	13810.4	13718.2	73979.4	55000.1	78925.9	75362.2	75814.9	79507.6	92039.9	79319.5	108302	19784.2	79366.8	14370	12723.8	60449.3	72675.1	78602.1	50192.5	85311.8	79221.2	12162.3	66781.2	12629	54610.7	60186.4	14607.3	11822.8	13341.4	13684.3	12592.4	11959.3	13476.9	14053.3	13315.4	13509.2	12583.1	10830.4	14289.4	12348.7	14738	12607.8
304	225.159	575.397	16083.1	15914.9	16720.6	17573.4	16954.5	17561.1	16837.8	20026.6	16083.9	17199.5	15689.5	16171.8	17200.2	65772.7	18757.1	15325.8	9740.87	15181.5	17095.3	14445.9	8261.29	14662	12277.1	14993.2	13854.8	15790.4	11469.8	11350.3	13458.5	17690.9	15241.4	14977.8	14101.2	15177.4	14856.7	14618.5	12964.4	15357.7	14938.7	14600.4	15853.7	14535.5	15009.5	13232.3	15647.2	16387.8	15122.4
305	225.117	455.56	21546.6	20179.7	19617.5	18734.4	20975.7	22105.9	19636.9	4882.24	4732.13	11081.1	5843.54	3693.4	4332.7	11779.6	5579.26	5554.57	4781.68	3841.8	25982.3	24344.8	3103.37	5451.75	4138.44	4136.99	4375.48	4013.63	23491.3	4095.96	29183.7	4719.29	3243.05	5646.27	5373.24	5358.25	6374.56	5634.3	3769.63	6760.94	6132.11	5318.95	24138.2	6608.42	4606.47	3754.26	5048.83	5067.71	5187.59
306	226.044	44.9673	6287.96	7864.52	7782.85	10812	6776.03	9268.47	6509.74	8708.86	12317	12593.7	10206.4	8651.5	8737.34	16835.7	11986.2	14197.1	9147.1	11739.4	14562.3	9529.79	7008.93	6999.19	9241.77	7613.53	16632.9	8236.11	8262.07	8894.87	9798.06	9534.16	6446.37	7353.4	6660.4	7517.3	5198.96	7231.28	5598.66	6927.86	5548.62	4111.6	17833.4	7263.19	7019.57	7921.74	5229.06	7012.56	7576.21
307	226.179	455.276	9593.63	10077.7	10176.1	9456.9	11075.7	9834.09	10781.1	21925.8	25038.1	24200.5	17111.7	18169	28546.9	64341.5	22803.1	25740.1	35651.9	21780.8	45527.5	31082.7	18022	21050.1	23035.1	22615.1	29264.5	21803.8	32452.1	17856.7	37762.2	17474.1	20058.3	78569.9	28711.1	45318	24633.5	15110.5	73045.7	30436.6	19770.5	20513.9	25634	58458.5	55010.4	47069.9	61180.3	22950.4	33985.8
308	226.18	836.455	2164.3	8249.88	8970.29	8535.06	10337	10083.6	11443.8	54777.1	51079.4	66311.5	31006.9	26126.1	79092.7	87696.7	63261.2	95467.3	302562	42100.1	37649.1	10077	10816.4	30436.5	16219.4	34756.5	81588.2	34219.8	28794.9	28633.8	10294	30415.7	22475.5	29388.9	26008	75177.7	14848.9	14100.1	1120.92	16125.2	19585.6	1377.92	17928.4	2278.38	105439	17205.3	109998	10228	21237.4
309	226.959	37.3821	752592	741501	743548	769170	788148	780728	762064	955515	927565	931308	956559	909351	916234	1.02767e+06	1.01499e+06	969679	759272	920558	780094	774557	910181	872779	892610	885505	877723	941291	734930	924774	776549	926385	892883	760505	752808	755797	740847	792921	765135	751527	760887	775627	720686	767049	724007	762034	755686	795375	768938
310	227.089	253.589	59300.3	55539.4	58238.3	59355.8	61175	57336.3	61396.4	65760.4	80749.6	61984.3	76263	84624.7	63726	128528	119202	147767	211604	119999	141785	163275	116138	98025.9	108802	90769.3	103967	114423	163370	104012	143159	70018.6	100350	31613.5	40783.8	30228.8	34146	31787.6	37326.1	32320	38012	22907.6	139250	29831.2	36553.1	34192.8	25340.4	28937.3	36830.9
311	227.102	296.904	92133.6	83882.3	92929.9	91845.4	90236.8	87984.4	89260.3	2939.85	2554.27	2941.93	3435.71	2939.01	1948.86	6547.78	2877.91	3008.95	4783.41	1863.76	5501.58	4182.2	2917.21	3540.23	3498.38	2232.76	2551.65	2565.07	4581.95	3379.6	7407.5	1909.59	2090.83	1139.18	894.295	996.224	1015.21	1089.31	838.743	704.399	1149.21	1293.06	5602.45	1468.27	1032.37	1222.84	641.598	1016.89	1008.34
312	227.971	37.5981	28125.9	25303.3	24580.4	28321.8	28641.3	26477.4	28455.5	35591.3	36069.7	31659.4	38713.4	36350.3	36311	37415.3	40497.7	38030.9	27143.8	32413.3	28794.1	31286.7	35550.3	32985.9	34007.5	33149.4	33645.5	33413.4	28959	33249.8	28434.6	34484.2	36333.8	26151.8	27694.9	28695	28666.9	26424.9	28815	26305.3	28194	27404.6	27478.6	27084	27339.9	27594.2	29014.4	26728.3	27621.9
313	228.196	500.028	66728.6	69058.8	70499.7	67978.1	67234.2	69493.6	68419.3	408074	426638	416285	387965	374493	455540	1.59575e+06	419964	432378	441516	405419	435460	378684	351144	381516	396586	400104	495356	402153	360314	360203	400878	377335	373311	108334	94923.2	103679	94489.3	75878.9	86673.6	78367.7	87123.9	72911.1	353666	92888.7	131162	88863.1	143156	73637.6	87920.3
314	229.154	45.7617	103973	102866	102017	107341	107722	102023	111427	44349.2	65379.9	60414.7	67075	76094.9	60545.4	75541.9	117200	109541	377740	81751	344573	572364	51660.8	52579.1	74916.9	41202.9	110564	78549	493484	70082.7	532928	57970.4	69917.1	80172.3	129885	83532.5	88022.2	80598.6	110542	76936.7	75006.6	148626	418824	74040.1	112646	99476.2	83693.5	108313	77730.9
315	229.199	500.56	15214.6	14881.7	15151	13967.1	14445.2	14230.3	15044.4	66094.9	63289.7	62386.7	57388.4	58838.6	68798.2	231507	64259.5	67575.5	60875.3	62518.5	65802.7	57136.6	51248.5	58047.1	58230.6	60058.4	76135	58985.6	56997.7	54604.4	61637.2	57262.3	56245.3	15919.9	14754.3	15577.9	13559	12608.9	13571.3	12547.8	14284.4	10173.7	54816.9	14458.6	19967.6	13936.3	22216.7	10444.7	14016
316	229.145	403.359	1.03793e+06	1.04305e+06	1.05081e+06	1.04406e+06	1.03796e+06	1.0224e+06	1.04742e+06	7051.64	5542	6345.07	5411.09	6710.99	6662.54	12443.5	5861.92	9106.07	9415.15	5265.49	7503.04	7045.9	6573.5	5935.16	3421.86	4357.2	4888.35	5080.61	8291.06	5209.63	7816.62	5519.82	4377.65	3078.21	4093.91	7565.84	3888.9	4222.71	3975.14	4081.84	3456.66	15279.4	6999.52	3323.06	2500	3015.96	4112.1	6475.44	3713.02
317	230.246	514	24386	22706.2	23670	22741.4	22416.4	24363.1	24042.7	102580	79753	77644.1	63075.7	68066.7	61076.3	103527	76659.7	75988.9	546433	72445.1	133850	130207	62158.8	60670.6	72738.7	66012.9	77416.9	73984.9	88908.1	440737	22836.1	51888.3	57677.6	29232.8	44752.5	78821.2	60771.2	31536.6	29163.8	38132.4	34433.8	25566.6	24611.4	19103.6	51245.8	24839.7	81432.9	23586	46572.1
318	230.147	404.251	135824	137288	137231	138396	138774	139398	137634	2236.26	2279.65	1752.48	1830.13	1612.39	1733.61	55717.9	2353.49	3540.66	1586.28	2935.91	2338.84	1620.58	2119.69	2764.2	785.396	2111.66	3940.8	1966.81	2240.51	2144.94	2785.69	2026.7	1106.67	31857.9	689.264	713.291	1023.12	12451.8	32990.6	20692.6	603.256	12661.2	2162.68	29866.8	15949.8	26400.3	1061.34	15632.7	28105.4
319	231.117	300.881	19343.1	18801.4	18973.8	19293.3	19312.3	19229.1	18735.2	1684.91	1195.98	2122.9	1665.66	2480.35	2258.02	2663.16	1874.7	2248.89	2567.39	2141.66	3548.67	2419.62	1663.79	2261.4	1317.79	2163.37	1125.35	1379.29	2129.38	1922.19	3612.04	2097.34	1448.49	851.065	984.187	825.808	1918.48	760.839	386.442	1223.32	936.257	1275.84	4789.33	1411.55	1341.79	1343.88	1712.8	871.969	818.847
320	231.127	43.3545	13393.5	11835.4	11567.9	13368.1	12175.5	10577.9	13490.3	32451.3	41205.8	33733.5	37125.2	24496.5	41666.1	32153.4	44239	30212.9	65862.4	28288.3	55763.5	37613.8	25342.4	22638.5	22722.6	20394.5	34113.7	26086.8	37611.3	23619.3	61353.9	38287.5	33319.1	13152.6	13850	11346.1	12517.9	10773.7	13589.4	5804.6	9493.01	15443	67588.7	11079.1	14424.9	7361.39	14644.9	13500.1	13530.7
321	231.149	403.694	16489.5	18081.7	18046.3	17825.3	18644.8	16856	19558.9	1130.69	850.648	807.046	1123.89	1875.52	869.781	2897.76	1332.85	1783.6	1189.54	690.613	1595.37	712.211	794.081	680.218	981.496	460.869	820.666	831.263	1446.63	493.789	1168.54	1257.51	1012.79	97.3151	539.161	487.933	362.789	256.816	354.284	104.104	626.614	383.004	1307.7	643.201	208.631	450.066	273.454	372.406	448.324
322	231.244	515.125	3698.84	2909.24	3952.59	3280.03	2988.36	3298.46	2886.87	16898.4	13118.7	12545.6	10537.5	10110.3	9610.89	19742.2	11883	11239.7	86599.1	11525.9	23973.1	19453	9210.92	9815.63	12671.9	11895.5	11532.1	11869.8	14408	71236.7	4708.9	9466.77	9698.54	3283.72	2969.03	12319	10829.9	3187.28	2341.5	3017.35	2905.17	2348.07	4635.39	2101.93	7959.84	2745.14	13252	1994.34	6983.13
323	232.154	191.049	49957.1	47109	48976.8	47947.8	48331.7	51378.2	50013.1	68943.9	37725.7	47747	50162.1	60273.8	46234	90887	81658.5	59616.4	124739	66230.8	122893	212795	43006.5	34476	34313.9	32841.2	81942.4	43359.7	226690	69664.5	108004	34615.4	43019	33469.9	20812.2	39278.4	31187.7	31853.8	58708.2	48795.8	51560.3	73349.6	170313	91595.5	32817.6	22878.5	23775.4	46174.6	53245.5
324	232.129	81.9322	14387.7	14966.3	12596.7	12838.4	13494.1	13572.5	14220.3	21822.5	17236.7	7070.46	19798.9	13753.3	26096.6	23121.9	19772	17632.6	41719.4	6922.77	99089.5	91033.4	13442.2	13668.9	9434.9	2576.17	28088.9	19217.3	61766.2	26147.9	45642.4	30764.2	5906.1	2398.49	11731.2	12395	12265.5	11782.9	12505.7	7895.24	12266.2	17485.9	46088.2	21969.5	16619.7	20084.9	14949.8	1981.29	5206.13
325	232.9	38.4731	16925.4	17989.5	16780.3	17401.3	17913.1	17985.4	16382.8	25345	26567.2	24886.2	23520.9	30079.1	29919.4	32134.3	26163.8	26835.7	32297	29960	30199.6	25806.6	23006.5	23590.2	24377.3	24495.7	26778.4	22924.8	29579.5	24922.2	26449	23247.3	26165.2	16307.9	17397.2	18061.1	14663.5	15666.3	15738.2	17958	17878.3	18852.3	31368.2	16956.6	20519.2	17670.7	17256.5	13818.6	15726.7
326	233.139	367.734	300446	302555	302946	304014	302820	301071	299777	1218.75	655.232	729.589	819.459	1008.52	1191.49	5830.12	1672.23	1035.45	1138.03	716.356	607.647	728.139	583.942	512.565	1483.9	1469.91	1131.58	975.861	2657.45	1608.98	1555.02	2047.9	629.832	967.139	469.314	203.089	491.69	587.266	959.489	743.304	0	345.432	1136.93	261.109	833.224	500.268	717.664	960.118	835.183
327	233.982	58.8391	13204.5	12807.5	11295.2	13687.2	12736.6	11907.9	12615.4	40595.1	44683.9	41047.2	43039.7	45430.9	39663.3	33378	26913.4	22392.2	10681.2	17543.3	30062.7	11181	19531.5	16638.4	18937.3	30049.4	16221.8	18688.4	10827	16216.9	9429.25	46677.4	12739	14314.3	14387	16174.8	15550.8	11948.1	12762.8	12489.7	13312.1	14921.2	27058.7	17028.3	13662.7	13023.6	19084.5	14406.9	14144.7
328	234.142	368.243	37670.1	38259.8	36477.4	39805.6	40900.9	37417.6	39631.7	1216.5	913.645	843.422	1548.94	823.517	2104.85	11342.4	713.691	1459.77	5729.85	1448.86	12778.5	6050.62	506.904	962.709	8786.19	856.039	1020.68	643.436	6460.58	691.362	11489	675.653	1004.25	1104.95	983.929	1853.17	1302.2	486.163	785.016	773.484	528.708	1185.3	7672.8	1064.87	1662.63	904.63	1423.21	490.97	1208.91
329	234.17	443.45	13249.3	13033.3	12846.3	11616.5	13433.2	11343.5	11525.8	550.506	640.701	668.727	12508.9	698.301	555.921	1940.14	756.549	1048.74	1145.99	745.33	625.501	968.761	374.058	363.043	494.663	331.013	12165.2	646.584	1535.55	1114.8	1414.87	488.881	370.312	288.485	226.205	492.578	346.581	294.425	616.136	241.523	262.706	404.732	854.012	126.644	375.435	145.963	527.417	387.9	0
330	234.965	58.3881	24268.8	24086	23972.9	13191.3	23120.8	23325.4	25488.6	16103.9	21561	16917.8	21440.7	21324.2	17093.8	11189.9	30387.8	30027.1	28141.4	11192.3	29265.1	25765.5	16558	16225.7	18268	34487.1	10898.2	29210.5	15721.3	16806.2	25303	30881.6	13525.6	23794	24684.5	25998.6	23287.9	21941.2	24057	23783.3	23504.3	26548.6	28081.5	22752.2	24973.9	14566.7	22161.1	24629.3	25275.8
331	235.169	669.892	12830.5	11446.1	10365.7	13499.7	12856.6	13236.6	13307	16324.6	16073.7	16218.2	14582.4	15919.3	16521.5	54297.1	21652.4	17208.6	14437	14608.1	17825.7	15842.8	6272.78	13099.3	13325.9	14789.4	15716.7	16767.2	16956.8	13189.7	25816.1	18471.3	12007.6	11386.3	11222.6	11695.2	11448.6	12669.7	11636	12020.6	12643.1	11656.6	16012.4	10758.8	10579.5	10382.3	10605.3	12280.9	11662.5
332	235.139	367.814	9306.43	8811.37	9608.65	8755.93	8748.58	6938.01	8199.11	5053.62	5284.48	4423.27	5694.36	4887.5	3926.63	9791.56	5048.21	3733.98	7027.39	4789.36	6116.67	6933.12	4176.51	4842.86	4555.44	4235.63	4755.86	3662.61	6772.47	3219.22	6705.35	5253.35	4085.96	3814.62	3891.82	2763.16	3378.71	2517.06	3484.31	2907	2491.18	2268.12	6421.92	1823.62	3180.45	1810.22	2721.35	2380.87	2139.46
333	236.15	332.096	13826.8	12821.5	14580.2	13516.3	14158.8	14306.4	13940	1325.58	1553.6	1173.66	883.001	1309.2	1269.04	7037.84	828.74	1295.87	1511.01	1203.35	1926.25	1103.83	922.073	1684.22	652.393	2003.7	1321.09	655.199	2818.61	1141.16	2977.99	1255.19	1023	332.247	361.078	467.469	447.19	226.419	469.492	328.377	141.026	323.329	2413.16	490.423	130.355	234.294	1088.96	327.558	656.705
334	238.145	691.243	10276.8	10577.3	10330.8	12221.1	10472.4	10629.9	10991.9	15853.9	17305.4	16862.4	16740.6	17171.7	16459.1	65406.9	22381.4	18375.4	13981.5	14005.5	15562.6	11186.7	4911.44	12889.4	12816.4	11995.1	15240.2	11436.1	13470.8	11530.9	14420.9	17822.8	10623.1	10039.6	10346.9	9431.83	8404.3	11551.1	9253.9	10167.5	10297.9	9846.29	13178.7	10360.6	10437.2	9191.68	9369.67	10505	10157.5
335	238.18	657.64	2147.44	2860.37	2635.3	2673.98	2805.57	2911.36	2373.06	26518.5	21258.6	26458.1	22614.5	19911.7	22534.5	349210	31763.1	20538	5681.34	12898	27759.4	14544.3	7870.05	11893.7	15038.4	17186.7	15573.3	17906.4	13992.4	13302.2	22206.7	24827.8	16169.8	1223.74	1879.76	3142.22	1839.17	2580.38	1644.09	2734.88	1366.84	1723.29	22305.1	2784.43	1694.48	1627.62	1499.4	1387.67	1525.73
336	239.1	343.036	71229.8	73902.9	75919	77834.4	75925	77133.7	78865.5	119288	114774	20473.6	83119	93726.7	98234.2	339032	184890	201319	140132	301795	438797	664328	151599	100497	128135	191391	365045	154412	643059	388533	327465	69920.3	165183	74081.6	107660	32064.7	183584	118772	55431.8	64369.3	112629	206252	388788	63778.8	135796	195184	55661.4	29611.4	117738
337	240.103	343.129	11348.3	9231.82	11281	10922.1	10585.9	10291.3	9830.94	17441.7	17101.3	2393.18	10407.4	13194.2	14353.4	46518.8	24629.1	26167.9	18396.1	40352.9	59658.1	87629.8	21828.9	14403.7	16998.4	24471	46931.3	21877.4	85848	51233.1	44397.1	10552.7	22082.3	9558.99	13162.9	4512.63	26012.7	15671.8	8284.25	10245.8	16457.6	30443.5	53121.1	9291.3	16962.5	27135.6	7793.06	4098.94	15229.9
338	241.105	333.65	280446	268263	267679	276630	275673	276800	280067	5761.44	6475.62	4391.07	4700.98	4846.04	5612.65	16567.4	7373.42	8589.24	14792.3	9118.76	15093.9	20941.7	5527.42	5534.25	6747.17	6649.75	10529.8	5254.32	19910.1	10053.8	16442.8	3986.46	5682.34	4006.32	3773.48	2382.26	5080.55	3807.13	2990.6	2980.53	3476.61	5571.33	20052.8	1872.37	3946.51	5362.82	2315.05	2715.81	3084.27
339	241.015	44.9011	6572.26	6108.93	7236.5	7346.85	6763.72	5834	6963.23	8062.06	9550.1	11438.7	11341.3	9346.06	12431.2	10703.4	12108.9	11549.6	8464.52	6998.77	6579.58	6118.09	9330.82	6877.83	7957.36	9411.75	11114.8	9001.11	5460.06	9438.98	7638.3	10132.7	8413.55	6053.79	6588.06	5860.31	7023.06	6402.38	6188.56	6182.8	5701.46	6678.67	6739.78	5338.61	8521.33	5429.57	7363.6	5914.83	6089.9
340	241.18	556.336	9278.76	9489.09	10439	10142.5	9981.24	9488.45	9509.59	2084.03	2061.86	17805.1	1322.98	2191.61	11164.2	56351.1	19119.3	2117.27	2470.85	1279.79	3507.47	3595.89	0	2198.33	1157.38	1569.04	2719.71	1315.47	3289.34	1703.56	5214	19011.4	1209.45	517.321	768.771	1140.14	381.543	455.154	677.174	1395.61	575.54	982.918	3689.27	902.909	1278.05	1244.3	793.669	1698.9	564.661
341	242.108	332.88	30983.2	30692.9	31868.7	31233.4	32820.6	32065.9	32450.3	1481.81	1209.56	1346.12	1575.81	1577.84	1367.31	3634.62	2253.07	1849.58	3062.09	1897.49	2850.08	2800.9	1168.85	2210.86	1409.2	815.428	2234.55	969.438	4420.36	1743.18	3682.43	1311.57	1274.48	386.372	109.353	363.376	394.547	250.513	101.594	109.633	468.039	239.05	2462.85	363.125	271.859	220.29	623.162	341.939	107.125
342	242.06	375.903	862.117	519.549	393.134	707.885	891.539	842.771	249.561	33741.3	34231.9	33709.8	33391.1	31154.8	32172.8	43194.9	36045.2	36989.5	80890.3	35486.3	93884.8	78564.2	28927.9	31700.3	31322.8	27564.1	33008.9	30503	87096.6	27961.1	88687.6	28115.2	29480.5	298.727	691.405	426.822	450.1	674.805	113.89	567.595	730.175	714.126	82425.8	218.894	257.107	0	455.231	692.772	459.185
343	242.926	37.4053	65170.1	65336.5	65306.1	66554.8	67355.4	67922.3	65595.9	68715	66297.8	66012.3	60705.5	67347.5	71498.9	71455	61310.7	61070.7	50932	67558.5	44988.9	42977.2	64231.7	62303.4	57651.5	73096.6	62300	67581.9	43570	67644.7	45313.1	62860.8	72077.7	59403.4	64845.1	67767.1	63630.2	60493.7	64338.7	71555.2	76821.2	65531.8	46504.5	65515.6	75213.2	55139.9	66024.8	69541.8	70881.1
344	243.123	776.523	9672.03	7435.16	9629.63	9138.05	9349.82	8866.41	9877.34	32477.3	44018.8	6352.33	44687.7	76864.1	55496.7	36707.7	42409.2	63281.7	442829	22348.2	25386.1	49991.4	22843.5	51679.3	15564	23196.6	55124.2	21598.8	76396.2	23943.6	24474	31510.6	21006.7	8960.7	12328.9	9871.31	22728.2	8038.01	15536	15841.2	13221.2	15696.4	48647.1	19406.5	17856.7	16723.7	18264.3	13620.9	765.332
345	243.159	436.382	89113.5	90783.1	88621.2	89688.4	89613.9	90923	87269.7	2309.45	1453.18	1611.88	1221.11	963.696	1377.62	4258.42	1480.36	2291.82	1896.52	1198.93	3267.24	3229.41	1415.59	1087.73	1732.53	1276.23	935.011	1266.04	4338.73	1541.21	3287.56	1270.64	981.243	758.548	626.271	1031.57	444.631	259.46	486.171	341.415	666.28	1527.08	14770	565.226	386.416	569.503	237.277	378.212	803.929
346	243.138	657.62	3029.4	3057.83	3231.2	3056.6	2886.01	3813.02	3882.96	37853.6	23331.9	38109.3	26721	25559.6	30635.3	422096	41863.5	22842.7	6841.24	17873.4	37585.8	22595.4	4861.36	14349.3	17497	23227.5	21589.2	25859.4	21828.7	18915.3	36650.5	34005.4	20631.8	1405.92	1550.8	1578.85	1962.07	2216.63	1351.42	1737.36	1927.51	1973.95	29042.8	1956.8	2591.8	1089.56	3111.78	1853.69	1419.59
347	244.059	375.335	436.371	641.732	519.73	674.225	820.672	823.999	782.955	9456.81	11481.5	11017.3	11000.4	10726.6	9628.21	13618.8	12908	13405.4	28578.2	11636.6	33894.3	26296.9	9535.06	11939.6	11031.4	9307.04	12649.5	10476.5	30301	10256.5	31370.4	8698.28	11204	0	0	0	212.931	123.197	152.413	212.405	0	124.794	28208.9	110.341	0	444.189	310.274	427.643	122.875
348	244.19	453.317	30645.4	28618.5	29622.5	17414.9	18679.3	29822.8	32135	43143.5	44696.9	45997.9	34250.8	35358.9	54263.9	124436	47210.3	49274.3	64891.3	44005.5	79324.8	53202.8	29664	38122.9	44092.2	36610	53067.4	42490.2	58297.8	35711.9	67428.7	31169.3	31490.7	148573	51633.9	78779.4	45831.2	28196.4	133285	56684.4	35372.6	38613.7	48095.5	110940	95457.3	81769.8	109470	43248.9	63439.3
349	245.059	60.6328	10542.9	9857.99	9430.05	9291.55	9515.2	10546.5	15062.5	21631.9	30254.1	25617.2	20471.4	32191.5	14686.8	44364.5	29060.7	27403.5	49914.3	24215.8	60960.3	87685.9	25262.9	20451.9	21854.8	17780.8	22080.4	16002.1	81629.5	27940.7	13646.5	20674.4	15364.5	10324.3	9832.56	14950	8186.76	11353.7	16787.7	14723.7	12679.7	19229.2	56674.4	16415.1	14691	11380.4	14965.5	10871.6	12955.6
350	245.153	301.924	44229.6	43627.7	41221.1	46380.5	46872.3	47081.5	44282.2	29550.2	27547.9	20018.3	22375	62217.6	9076.02	17769.7	27267.1	149110	47150.2	64227.3	59701	158587	39232.9	42499.1	60394.3	8154.69	51009.2	45864.9	132536	16707	87038.3	18234	14956.1	9371.51	17314	8718.74	13723.5	6721.89	29611	22513.9	16110.3	18474.5	155564	23685.3	8802.52	17036.8	21028.1	4704.42	14403.8
351	246.17	272.17	40027.9	39609.2	38501.9	38236.4	38566.7	39058.4	38215.5	51633.3	34550.2	52744.8	45315.7	41585.9	24405.6	64771	86528.7	91560.4	97688.4	42458.6	99075	134384	41085.6	26265.7	52868.6	18476.4	90965.5	60254	153086	68552.3	88793.8	50454.4	34063.9	19246	24134.3	30697.9	31855	20379.4	68187.5	25448.8	40065.8	76638.9	156505	24512.3	23730.1	19812.4	25328.4	38410.9	34357.6
352	246.242	446.051	27619	26198.1	26479.7	27878.4	27522.8	28028.5	27577.8	133198	206188	156572	129335	150678	121535	187039	166517	151633	1.26227e+06	126333	86073.8	107620	152625	116861	156702	128630	140690	148154	143962	111544	69961.2	88619.2	108887	40607.4	29210	37336.4	37862.8	20355.5	44987.9	61631	25810.7	73275.2	88183.1	29011.8	29775.6	34245.3	42050.9	55969.8	53174.8
353	247.145	264.113	80529	80957.2	86012.8	81170.9	83728.5	85416.3	85066.6	109005	140574	54874.7	280139	307691	29091.6	58789.2	133446	51811.8	278911	31491.9	113158	72266.4	154366	36889.4	264071	655457	143883	38651	331337	147959	623663	119311	70618.8	48351.5	67662.4	73993.6	80975.1	60932.6	34542.4	72690.7	62853.9	42899	906511	20881.5	51655.7	20203.5	43003.6	144608	135983
354	247.155	402.388	661473	665596	659258	652077	656521	658710	661027	1420.37	1180.81	1994.01	1504.12	1794.18	1592.77	4260.25	2432.05	1250.93	2025.53	925.105	1665.94	1995.17	1405.68	2036.73	683.15	1426.81	1979.15	1167.32	2478.41	930.062	2509.68	1540.39	1238.32	1505.79	1752.87	1625.35	1148.55	743.08	1012.81	1341.8	1202.74	1377.76	2519.24	613.689	1264.65	632.715	976.347	811.542	435.243
355	248.147	264.35	10362.9	14040.6	10874.1	13760.9	12691.5	12337.1	13598.7	18628.2	24142.2	7604.74	43834.8	49137.3	4707.55	12388.3	19921.4	8632.89	42740.7	6109	20316.6	12615.2	24929.2	7817.14	42155.5	97381.5	21733	5858.2	52060.8	25315.1	96645.2	20666.2	10546.3	7371.15	10614.1	12022.1	13167.7	8658	4171.93	11582.5	9916.04	6552.57	141531	2973.63	8703.82	3550.85	7230.36	23613.4	21332.3
356	248.158	402.638	88422.5	87461.1	90807.7	88191.1	87498.5	85152	85672.5	145.97	370.502	699.609	266.271	1090.4	287.129	2193.83	563.706	918.138	25045.8	1024.01	939.683	635.534	941.701	660.836	496.128	381.334	1219.98	985.129	951.36	588.557	8571.74	415.935	365.084	127.573	0	429.744	566.152	357.466	370	257.01	255.253	99.3934	781.642	339.299	258.895	663.276	227.548	239.497	0
357	248.987	42.7296	12952.9	12849.3	13410.2	12105.7	12345	13510.2	12090.6	13564.1	15292.4	15328.1	17048.1	18482.2	12708.5	20119.2	20563.1	22957.9	35027.1	17195.3	26481.2	33253	11771	12979.5	14446.1	11843	20484.8	15943.8	26126.6	19850.4	26465.7	14262.4	12936.8	12174.2	12385.9	12899	8286.89	9896.2	13889.9	11131.5	9976.66	11905.8	28275.4	9661.56	12450.8	11662.5	10060	13638.9	12483
358	249.206	510.875	70371.2	71984.6	71035.7	73061	71898.2	74326.2	73113.3	486244	442188	471459	458499	441941	460099	2.27113e+06	491361	455959	422960	434443	435919	371628	417305	429112	431616	448797	441228	444090	390563	429813	404365	457646	429072	68779.5	65264.5	68509.8	65927.3	67810.8	70024.9	68443.3	72976.3	71378.2	415447	71789.9	65733	65106.1	69812.6	72439.5	71105.8
359	250.184	501.291	29047.5	28475.7	29831.9	31401.4	28713.4	28945.8	31196.3	300287	272570	302191	257521	241345	305906	971476	254131	237072	256893	238201	229743	179969	193915	249770	223185	251963	282421	239995	170614	225998	236319	264495	231501	40623.1	34742.2	38838.9	35784	32016.9	32696.4	36164.7	35045.7	32717.6	201922	37208.1	47760.6	33515.8	51247.3	32571.2	35849.5
360	250.165	367.896	40522.3	37135.4	39531	39763.1	40680.8	40139.8	37280.8	1585.76	1383.83	1251.06	1424.82	1041.37	1218.89	3603.51	2492.59	1320.34	1060.37	1388.3	1610.18	1202.9	1402.76	1181.28	1409.78	1763.88	1373.05	1725.08	2428.55	953.223	1277.62	1015.53	1332.94	813.629	627.698	581.105	203.227	207.374	761.599	314.521	241.427	748.217	1781.28	725.556	228.284	372.362	475.219	495.519	218.212
361	251.129	549.637	38433.9	39843.6	41118.3	40501.1	40078.6	43205	41689	56169.7	39606.3	53969.2	47092.1	21136	47347.8	82371.7	78448.7	114750	167422	128051	507551	192437	58194	81373.2	83461.9	28047	81372.1	55469	203166	177220	265026	47030.6	52334.4	44083.6	52171	50891.8	23154.3	45566.1	66684.9	26977	59863.1	57988.6	557572	28047.5	36669.3	62883.7	24259.9	27199.4	62737.5
362	251.185	335.44	16901.7	16023.7	16558.5	9159.05	8265.51	15681.2	9062.46	16061.1	17121.9	13800.9	12809.6	20574.4	14002.1	46407.8	15675.7	18620.9	25078	15821.8	28632	35826.3	14693.8	16579.4	14557.5	15084.6	14661.8	15162.1	37000.9	14086.9	38810.4	15108.3	15545.2	9006.6	8483.23	9164.51	12035.8	10263.2	8861.01	10153.4	8486.18	10798	33423.8	10187.3	8691.38	8638.92	9858.42	10395.2	8657.74
363	251.18	501.091	8202.83	6440.17	7840.13	7654.91	7239.67	6873.1	7416.67	45206.3	43345	45533.4	41712.6	41838.2	46490.9	138580	43323	38018	38734.7	38125.1	35624.6	27744.9	31018.3	37330.5	35649.4	39847.3	43255.5	39107.2	25984.6	33553.5	36268.8	41546.3	35364.2	7436.12	7048.11	6758.9	7065.34	6298.91	6453.84	6608.07	7288.57	5883.23	30361.7	7229.51	8130.5	7256.77	8501.11	5829.69	6178.93
364	252.132	550.157	6730.49	7349.45	7581.08	7343.26	7034.44	6893.12	7120.52	10406.8	6666.73	9435.55	7751.97	5000.93	8447.32	19102.9	15224.7	19051	28593.3	21213.3	75899.1	29407.6	10318.6	14577.1	13557.1	5993.23	13197.4	9130.55	34033.6	27553.9	41834.6	9707.01	8607.94	7269.3	8221.22	7188.49	4351.17	8254.61	10351.9	4414.13	9713.55	8784.96	86366.6	4781.91	5714.44	9075.27	3922.79	4370.52	11004.4
365	253.124	371.915	18868.5	18445.4	18893.7	16334.9	17699.1	18190.2	19756	3544.48	3744.8	3760.33	3083.67	2611.88	3072.06	10804.7	4675.9	5458.35	5421.92	5692.67	14919.2	4873.97	3144.88	4724.12	3247.16	3829.41	4820.87	3356.86	6875.64	5366.24	5282.41	3062.16	4076.08	949.834	883.395	711.688	818.33	1420.05	750.403	402.801	1029.21	1033.23	22239.9	728.15	883.116	1159.65	484.555	641.777	362.413
366	253.117	277.354	7991.81	7673.94	9786.22	8135.04	7936.28	9234.73	8621.57	3857.37	6557.36	3079.26	5846.13	3366.34	2917.9	7441.44	3369.14	6443.41	13541.4	4328.6	11452.7	23297.6	3799.47	4546.87	3983.83	3206.55	5765.19	3560.88	22527.7	3669.56	21141.5	7703.82	3408.13	3301.26	3239.77	2725.6	3191.24	1840.06	4397.35	3963.56	2638.22	2845.38	13702.8	2920.01	1420.86	2548.92	3590.96	2707.58	1787.67
367	254.124	59.4604	9299.67	9513.81	10723.9	9601.16	11008.4	9830.94	9824.91	27293.1	27517.5	19240.2	21724.8	24757.3	27223.6	35458.1	30356.1	25875.4	25740.7	20509.2	13722.9	9758.06	21651.2	22395.4	24241.6	26849.5	24876.4	21126.1	3688.08	23443.6	8303.66	22551.1	18067	5730.33	6872.44	11081.4	10390.6	7986.39	12136	10236.8	8237.19	10560.7	14507	14710.7	4935.13	10616.7	7564.29	6829.53	7637.08
368	254.824	40.8806	35030.1	33482.6	35694.7	33533.5	32691.1	35399.1	34419.1	42282.6	39547.3	38266.8	41328	40491.2	38170.7	50112.7	44052.8	41381.6	84859	39712.4	97447	82147.8	37763.5	38645.6	41255.7	33939.8	38524.4	35643.9	78016.2	38099.2	84173.5	37062	33850.4	34129.3	32893.4	33913	32431.9	32542	32494.9	31062.9	31415.3	32659.2	82982.8	33950.8	31590.2	39116	29841.1	31425.9	30290.1
369	255.121	367.656	397840	394643	408732	402452	407321	415646	407327	3618.18	4459.71	4700.1	3111.8	4211.88	4640.21	7319.56	6471.87	5080.38	5470.9	5440.18	6275.95	6654.13	3643.14	4063.89	3655.04	3390.48	4709.08	4319.14	8610.26	3428.44	4585.72	3788.4	4957.65	2475.36	3080.1	3412.16	3143.63	3107.34	2927.5	3213.23	2521.99	4549.42	6127.07	2600.99	2205.05	3152.25	3028.22	3082.16	3050.82
370	255.162	512.948	9466.04	9742.33	8535.78	12175.6	9988.45	9697.84	9558.88	13951.9	14091.2	11563.7	12400.3	13946.9	12611.7	44836.9	18709.5	17011.3	32035	22265.3	49962.9	31053.7	10959.1	21542.1	14888.6	11245.5	16341.6	10324.6	55492.5	19564.6	39892.4	16423.6	12091.6	4119.87	5059.4	4904.45	6577.45	6122.7	9607.25	4626.85	4514.99	5459.9	227620	5192.72	4797.83	6249.02	5558.31	5765.27	4607.8
371	255.175	781.011	11652.1	11126	14217.9	15422.2	12987.4	15749.5	15578.5	34170.9	43771	13592.9	44128.3	71782.3	43585.8	39759.9	36374.8	64049.2	238948	19434.5	23426.5	31557.1	21959.8	49046.1	22507.4	26104.8	60627.1	27806.4	67851.7	25076	28241.8	29562.5	24097.5	11453.7	12080.7	12563	22892.5	11202.7	14546.3	19337.2	10946.9	25149.9	41590.6	20434.1	14238.9	20470.3	35603.7	21473.9	9570.26
372	255.16	452.665	9186.39	11132	11503.9	9490.9	10793.9	11014.1	11003.9	5446.02	5321.69	5277	3683.03	16376.6	6839.22	9084.54	17866.9	22508.9	13948.7	17007.9	29914.2	9228.33	3232.78	6847.01	3254.55	3750.33	8303.3	18584.7	22321	24920.3	9672.33	5594.95	3312.77	2517.91	3167.39	7045.09	3270.28	2871.5	3834.96	2746.65	2042.21	14918.8	68729.7	3638.95	3127.53	3020.49	3110.4	5431.39	2306.88
373	255.97	37.9101	7460.25	7139.63	6775.14	8302.53	6019.18	6846.7	7705.18	5589.52	6266.36	7099.49	5406.16	5346.83	5989.2	7461.13	8059.14	6692.52	12105.6	5746.34	6463.63	6410.72	5187.64	5078.01	5371.01	5258.79	5128.83	5275.57	7242.66	4586.01	5626.07	5886.24	4679.87	6942.44	6982.03	7618.93	7100	6575.02	6116.01	8909.3	4765.7	7377.7	6733.14	7843.83	9311.25	7875.85	7819.72	7655	6588.04
374	256.126	367.656	50970.3	49792.5	50360	50496.8	50351.2	49109.8	53110.1	7461.66	6638.38	5928.54	7174.52	7378.03	5120.7	7900.8	7190.45	5808.79	7277.78	6454.66	7103.8	5475.82	6434.22	6728.92	7492.29	6325.42	6469.73	6299.68	6523.8	5713.58	6451.03	6417.3	5694.64	3861.02	3196.8	3546.01	2685.37	3021.06	3664.48	3703.25	2832.52	2566.53	6349.53	3812.31	3574.9	4079.12	3149.62	3469.83	3415.35
375	256.262	793.055	92589.4	95533.5	98535.5	106420	111526	105892	107928	26991.3	42081.1	33290.4	60364.7	22437.6	24911.5	75344.9	44038.3	33618.9	147046	74581.2	15538.8	14271.2	18757.7	34707.2	15139.6	38079.4	70539	76849.3	71889.2	45160.9	18008.6	20926.9	20184.1	102437	158129	188663	107550	75370.5	128726	136143	92848.4	131203	19108.6	93643.5	288936	88128.8	208137	86729.4	101572
376	256.821	41.0192	42631.1	42845	43998.7	44738.4	42553.3	42871	44271.4	56458	52938.7	53025.7	52770.4	54105.4	47858.1	64900.5	53819.4	54958.2	110139	50896.1	120572	105828	49373.4	48312.3	54362	42788	45215	46848.7	105509	47212.7	107688	47705.8	44204.7	42996.4	41475.9	43997.9	40124.2	41342	40838.7	41617.5	40750.4	43255.4	107447	43135.3	37994	53542.4	40369.2	38660.7	36993.3
377	257.267	773.55	16274.4	16469.6	19108.1	18403	19023.6	19206.7	19224.5	0	185.567	0	10522.4	0	0	12231.1	213.58	233.017	30797.3	12397.7	0	0	0	0	0	0	13334.1	14727.9	13750.1	0	0	0	0	18043.4	29925.7	34559.7	20168.1	13325.5	23053	24645.3	17441.9	25023.8	0	17664	51356.7	15322.7	38723.7	15413.4	18159.7
378	257.177	469.486	870205	858349	872377	881616	867435	891555	870277	15050.8	12316.5	5139.31	10614.9	14548.4	11828.7	10517.2	12005.7	23003.7	24796.7	13060.9	26656.8	33099.6	8556.7	12973.9	15711.3	8090.2	9798.83	11361.2	27982.5	11187.6	80892.1	6908.02	10622.4	7662.25	6967.9	11114.2	9567.21	11663.7	9431.77	6594.64	9820.5	22256.5	48296.7	7412.96	7892.83	8298.6	6756.47	12376.3	6186.54
379	258.11	43.334	15327.8	15046	17487.6	15399.7	16942.2	15372.7	17847.2	144790	278894	157568	223817	266058	167597	249410	281995	428686	383992	285155	209131	238793	228866	272574	258567	141322	223346	241903	232751	234459	204881	204279	147596	36023.5	31035.1	21423.3	26617.8	15564.9	27307.1	18801.5	16652.1	18018.1	259321	21880.2	37164.2	52467.8	22166.4	21462.7	23037.8
380	258.179	468.882	135519	136376	134441	136458	136629	139102	136610	3111.51	3097.17	1003.25	2615.19	2506.07	1786.72	3841.64	2338.48	2840.62	6022.05	2959.88	6025.11	3744.78	1444.83	2780.98	3129.11	1856.77	2010.17	3102.37	5811.59	2343.58	2723.43	1394.77	1819.47	702.418	827.658	1475.12	1115.79	1082.25	1177.63	860.522	1924.63	3401.74	3233	1184.86	659.751	1370.41	635.29	1855.45	462.624
381	258.246	578.713	11575	10914.3	11097.5	10350.6	10766.5	11129.1	9976.08	46118.4	32468	31249.4	24795.9	26378.1	26597.7	76476.9	31383.3	30225	180686	26404.5	18103.2	14654.1	18544.2	27183.9	25570.5	26054.5	31303.4	26315.3	22254.2	22717.1	15943.2	24956.3	23896.7	13173.6	11035.6	19716.3	22740.6	12552.3	11282.1	14622.5	12370.5	13723.6	16534.7	11057.9	11401.6	10601.4	12116.2	13592.9	14454.4
382	259.095	42.3841	12909	11792.2	13709.9	13148	12600.1	14031.9	13347.3	42265.3	79577.5	54159.2	55224	82331.2	43507	81523.6	62693.8	102262	102009	67406.7	127419	160276	48663.1	68129	54878.9	42910.7	77338.8	64022.2	212472	52649.2	234199	49639.7	37285.1	10624	11985.4	12170	13639.1	9246.27	12820	12574.3	12252.1	14128.2	160857	12383.1	13955.4	11906.8	15271.1	14482	13623.4
383	259.154	340.702	30554.1	30234.2	30481.3	28547.3	30064.3	29042.1	29227.3	1301.41	1204.38	548.048	441.704	1211.84	1305.62	3838.22	1809.32	777.323	1269.01	1087.93	777.629	1388.4	899.828	675.816	932.508	1346.58	1087.04	860	2774.38	917.738	4060.32	717.127	1969.01	443.036	763.936	615.027	458.239	281.966	1183.23	441.028	238.653	658.483	2287.19	495.089	924.734	757.065	715.447	1017.02	468.771
384	259.181	469.851	17887.3	18796.3	17614.6	16289.7	16979.7	18202.9	15724.5	12426	921.437	8851.55	7191.52	1303.95	9688.94	30230.6	1015.03	806.463	2535.7	535.051	2415.65	908.23	499.561	603.564	911.614	702.965	610.96	1315.54	3644.46	907.289	3041.4	7832.07	1136.19	1491.62	451.362	864.318	840.31	312.333	626.878	556.445	495.189	568.633	2175.26	573.124	910.712	1031.12	1058.59	885.991	800.467
385	260.182	333.589	34892.5	36295.2	34746.5	33981.3	34262.9	33825.9	34518.4	45099.4	37446	37572.6	28051.4	44344.7	43252.2	48243.7	28585.4	69872.5	59943.1	34599	76678	51594.9	21916.2	31275.1	18676.7	18841.1	59892.4	19680.3	42450.4	36419	85586.4	42198.4	19311.5	17187.8	12723.3	54567	21249.7	19560.4	22244	24974	20109.7	173830	55273.3	19598	13998.7	21573.4	28238.7	44279.3	21150
386	261.014	41.9083	114456	114744	114517	117853	116643	118828	115652	133087	143297	129491	144203	142488	131283	184058	165391	168631	227542	146852	234713	214043	140594	126131	127587	137768	138919	122363	194915	129021	247028	143030	160430	102007	99597.3	89849.9	104117	102443	91842.5	96589	90251.2	88167.4	215513	87941.7	105596	108565	101886	97559	112605
387	261.143	242.291	22637.4	22978.5	22365.8	24993.5	23603.5	23695.6	22573.9	19564.6	27657.6	24339.2	27699.6	28914.3	14180.9	35033.9	43496.5	74986.3	46557	32229.4	47950.7	85492.4	17217.2	22096	21085.5	16531.3	45746.3	32744.5	108247	25213.3	60644.3	26067.6	17385	14342.2	21393.3	19075.6	20716.7	15956.7	27790.1	21214.6	15863.5	23705.8	81467.8	18003.3	21132.1	19118.5	18619.5	18175.6	22618.5
388	261.169	434.579	134076	132458	138445	143560	138547	133697	138093	3444.18	3088.21	2820.08	3492.17	3529.76	4190.29	6525.48	7660.09	6795.67	2733.33	4419.37	2701.28	1848.2	3403.64	3467.13	4882.83	4619.54	5397.36	4025.05	4560.53	3645.08	3650.37	2591.28	4914.87	2731.98	1873.1	2278.74	2015.16	2246.63	2711.62	2984.69	2058.09	1839.25	18442.5	2750.11	1994.48	2005.93	2790.45	2175.48	2620.3
389	262.022	41.9533	8593.89	7737.17	9243.94	8601.29	9517.72	9407.64	9731.02	9812.34	11495.6	10670.6	10781.3	11830.2	24930.1	13341.8	13118.6	20967.4	18763.1	11345.7	18519.5	70021	9477.85	9387.92	10483.3	11316.6	12142.3	11706.8	55225.6	10271.9	19278.3	9905.27	11077.4	7293.24	11582.8	7031.52	7915	7252.41	6792.53	6879.83	6907.65	19414.7	22314.8	7061.75	8839.78	6999.1	7859.59	7433.91	8844.06
390	262.087	126.074	15521	16099.1	17791	15388.3	17121.6	16217.3	16682	126.774	0	131.097	379.749	0	126.996	106.442	336.441	722.608	655.166	0	0	393.306	334.201	396.258	301.355	150.424	246.201	0	1547.78	262.431	1134.39	0	147.735	386.872	247.989	220.536	630.388	612.164	220.598	484.771	825.165	672.742	934.639	107.46	206.799	405.448	250.107	502.246	853.404
391	262.173	436.228	20040.5	21472.8	19397.3	21282.5	21568.1	22307.7	21370.6	879.149	262.509	580.282	533.344	1042.87	619.743	1396.1	1980.91	1359.73	22679.7	823.473	31289.8	21501.9	554.353	466.338	697.507	516.843	867.082	927.818	18715.4	833.449	17089.3	761.668	1185.67	1055.07	1509.24	3620.97	1868.66	1698.91	1219.64	1746.16	1152.66	1013.04	22576.1	1650.55	2273.05	1309.25	2526.65	1284.96	2469.3
392	263.009	41.948	36986.1	38273.5	40433.1	39977.7	42769.3	38078.9	40085.8	44828.5	48785.2	45438.8	50288.1	47115.9	45388.3	61504.2	56962.9	59345.4	78507.7	51082.3	82587.9	70718.7	47603.9	43036.8	43378.5	48090.7	48984.8	42141.9	63780.1	46307.9	82985.1	49800.1	52953.5	34832.2	34573.5	33188.7	34085.7	36645.5	34104.3	33703	33166.8	30073.4	77908.8	32345.4	38214.8	36409.7	34540.4	34879.6	36252.7
393	263.092	474.139	11761.4	11687	11399	11361.1	8789.37	9219.08	11824.3	33669.2	43032.5	6181.07	37104.8	19243	34410.9	134129	126230	136598	73061.8	112095	417626	299151	48558.3	52388.5	126801	53282.2	128124	101914	204280	279012	312735	41968.3	83357.1	25849.4	39111.8	13346.3	30423.5	35858.4	41876.2	13646.5	33358.5	45021.3	311345	12703.3	40591.3	40702.1	10696.3	10039.1	35114.9
394	263.103	125.831	14072.3	14472.6	15372.4	16038.3	16550.6	15279.7	15266.1	6250.23	6738.94	4759.96	5503.55	5080.13	6249.92	2265.83	3412.78	5323.43	4340.93	13859.7	5540.1	6183.12	4640.46	5311.63	5765.22	6190.51	4778.23	4381.34	4107.52	5140.85	4465.95	4090.47	2944.8	2282.55	2001.08	2888.88	2974.07	3084.95	2821.04	2498.99	2780.69	2553.71	4024.68	1956.07	2795.21	2633.12	3392.24	2687.69	2413.53
395	263.236	773.47	10449	11926.3	12674.3	14513.9	15023.1	13867	13609.5	3660.13	18423.9	15835.7	21595.9	11951.1	6417.94	37837.4	23579.5	29070.1	90211.6	45263.2	5177.78	5216.41	2955.69	7943.64	0	12948.1	15610.3	16797.3	8586.13	11308.7	5866.16	22500.6	5393.18	3040.66	14502.9	2699.26	3766.23	3034.71	9310.31	2777.58	1988.8	7831.4	1579.5	3024.76	13834.3	4017.6	9506.64	8912.96	1746.27
396	264.18	401.406	44173.2	44720.7	46214.4	46091	45546.5	42471.7	41323.8	458.008	254.917	229.939	526.009	134.405	337.988	2448.92	358.376	383.372	1001.82	385.446	1074.98	803.891	107.422	99.4918	105.159	558.136	115.696	435.472	1589.06	351.839	2535.95	393.014	218.587	376.174	317.429	771.23	493.147	941.583	953.897	448.297	1190.48	1172.1	1247.57	404.501	0	542.366	228.102	587.067	747.552
397	264.869	39.1767	6027.47	6682.91	7066.97	5859.25	5935.21	5839.15	5855.23	12736.4	13697.9	12284.8	14986.3	15100.2	12338.1	16423.5	15038.7	17264.9	40122	13465.1	41331.1	38677.4	12113.4	13660.4	13915.5	10264.8	13626.4	12904.3	40231.7	12535	38011.8	13858.9	7290.22	7432.16	6732.36	6626.74	6476.15	5207.26	5336.76	7736.81	5322.95	6032.06	37537.9	6399.54	6120.75	9225.23	6994.09	6319.28	4875.49
398	265.119	281.533	26331.2	27133.9	26777.8	27854.8	27033.5	30512.9	26501.2	99367.6	46789.4	24940.7	29148.9	29716.9	39121.8	215519	37928.4	21488.5	222005	49575.2	317523	41810	25900.1	98955	33715	8626.01	69702.1	61361.2	193847	86556.4	65705.8	13179.3	43340.7	35453	6480.78	13390.2	34763	56705.5	63242.9	66861.4	62552.7	73740.6	53153.8	13984.9	86962.9	23967.1	12842.7	44296.9	20814.3
399	265.177	400.93	6932.14	6901.31	6882.69	7286.98	6869.83	8257.4	6758.55	2702.46	4217.59	3515.09	2572.61	3922.54	3277.94	8699.46	4617.7	4068.47	6017.76	4192.26	5954.73	8062.72	2310.85	3181.8	4527.81	4132.03	3522.31	2630.77	7719.72	2702.97	9899.45	3040.59	2908.58	1769.67	765.744	1178.67	970.497	1060.77	2302.27	878.423	823.574	982.721	12068.3	1040.15	1202.35	1134.45	824.367	627.147	905.938
400	266.172	455.276	9054.71	6759.2	8155.66	8858.6	9015.72	7617.21	8622.93	30049.7	33304.5	35188.1	24081.7	21473.1	33898.7	76634.5	27633.1	26278.2	32590.7	24997.5	50596.8	27096.6	23682.4	26284.3	31904.6	29342.3	42527.8	25337.5	28874.4	21932	31810	23802	25344.1	66882.8	27566.1	42428.6	25862.5	16182.3	68221	29447.7	16829.8	19733.9	29585.5	50497.3	52213.9	41759.9	54987.4	23339.9	29723.9
401	266.232	510.17	11151.1	11662.7	12614.9	12109.1	13265.2	12562.8	12504.4	81998	74944.1	80749.6	75607.9	73097	75427.8	375471	81922.1	79217.5	68077.2	72894.8	70586	64474.7	69209.6	72922.2	72170.1	72129.5	74124.1	74255.7	66496.3	69164.3	64129.7	77740.5	75158	11248.9	9628.51	10254.7	10738.3	9883.06	10668	11748.5	9753.12	11281.9	68683.2	12184.1	11263.1	9949.35	11729.7	12082.4	11134.9
402	267.065	60.9214	9205.37	10247.9	9810.43	9517.55	8824.98	9931	10042	20171.9	19513.5	19027.1	19040.1	25175.8	14230.4	37822.5	23391.9	30369.7	68554.6	26573.3	83401.3	95348.2	22908.1	24655.7	29393.1	23640.5	24215.4	21247.1	128489	26716.3	89135.6	23121.8	19713.1	6713.32	8960.43	8427.1	8119.16	11241.9	9755	10259.1	9110.48	11280.8	61474.1	10553.8	10309.5	11925.6	8585.01	7717.11	11175
403	267.124	389.829	14254.1	13858.6	14014.4	14482.2	12316.2	14093.8	14073.4	15770.3	15769.3	16424.3	17386.4	17006.8	15953.1	19161	15926.2	16977.6	15505.3	16604.6	20176.5	15948.3	13927	14711.8	14722.2	14410.3	15461.7	13522.7	20615.8	16464.1	18537.1	16093.3	14781.1	1623.65	1642.74	2404.64	1194.14	3050.1	1790.69	1338.14	2568.41	2711.46	46451.4	1207.06	1505.51	1485.89	1768.86	1209.43	1281.42
404	267.17	653.786	9332.51	8905.85	8038.58	8577.46	7936.82	9906.03	11268.2	22175.1	20666.8	24259.7	22895.3	22987.3	23323.1	83736.3	25760.8	20246.2	20915.9	21551.6	29455.7	23120.3	12203.9	20130.9	18832.3	20615.4	19960.6	21398.3	21362.9	20447.8	25638.2	23367.7	21450.7	7070.32	8040.43	6823	8627.84	9512.08	7449.91	9385.25	10027.7	8878.44	24019.4	8145.74	10423.8	7024.3	9668.21	8500.35	9332.67
405	267.268	16.7771	0	0	0	0	0	0	0	26546.2	20982	19107.1	22005.5	21919.1	19255.5	24434.3	20740.7	21524.4	22093.7	21146.8	26475.1	24098.3	20734.7	19386.9	18731.7	0	21273.7	23135.1	23822.8	21027.2	23866.6	22965.6	17976.6	12044.3	0	0	0	0	0	0	0	0	25602.3	0	0	0	0	12510.3	0
406	268.189	499.962	2154.1	1426.5	2191.53	2236.55	1405.07	1685.18	2202.27	33530	32851.1	34067.4	33425.8	30906.5	42132.6	96612.6	32111.9	34600.7	27374.5	34456.8	32221.9	26610.6	24866.1	30588.9	30436.9	32468.2	39509.8	31066	24927.5	28786	29209.5	31289.1	30282.1	4068.57	2875.76	4746.55	3354.53	2737.09	4155.16	2727.62	2507.71	2052.75	24012.7	3457.73	5791.28	3513.13	5516.99	2952.35	3010.97
407	269.137	402.979	650818	654098	662275	648684	657869	647730	648791	3730.77	2075.21	2319.56	3000.21	1483.77	2086.52	6208.2	1739.45	2702.45	3705	3128.43	2991.1	3188.13	1611.55	2971.49	2370.99	2249.01	2171.61	1881.44	4647.98	1813.26	5137.77	1849.52	2595.74	1942.49	1187.46	2115.86	1787.2	1308.75	2432.16	1313.41	1120.24	1347.07	5542.62	1776.81	1524.5	718.852	2124.35	829.624	1876.97
408	269.226	803.359	13283.4	14700	16458.4	18610.8	18050	18091.8	19067.2	15941.4	22237.3	13744.6	22266.4	29980.5	13339.5	31980.7	39325.2	40324.4	105484	21229.5	7099.68	2184.5	5709.08	11130.8	5759.78	14896.4	32196.6	24388.6	24134.8	20213.1	1805.28	20855.9	12772.7	10010.4	22058.7	15025.3	18529.2	17087	23544.8	17210.1	17313.7	17848.7	4958.42	13085.1	16654.3	19633.4	12727.7	14693.2	13995.5
409	270.14	402.968	87949.9	88971.3	88255.2	92727.3	91765.9	88831.5	83679.7	393.083	667.521	491.123	709.471	573.091	324.525	1994.86	344.6	532.479	12928.7	123.322	637.71	1713.96	585.035	452.394	475.936	1019.16	915.761	370.804	18841.2	512.296	1272.69	478.064	253.271	106.22	229.345	100.933	507.324	0	0	250.101	585.817	453.99	25240.3	142.542	358.082	243.362	117.217	111.434	256.884
410	270.979	42.613	22793.9	23070.5	21079.7	21148.4	21913.3	21804.9	21040	16869.9	17271.8	19017.2	24698.4	23757.5	16142.6	20673.7	28555.1	30202.3	38739.7	22086.9	29645.5	32810.3	14945.2	16523.4	21297.8	17601.2	22850.8	20542.1	26096.8	25252.6	9197.85	17107.4	20932.7	16323.3	18945.2	19662.1	15291.4	19082.1	22131.3	16844.5	15879.1	16439.5	32321.6	15683.7	17693.4	15556.4	15101.5	19513.1	18906.6
411	271.19	508.68	78287.9	76174.7	75599.8	75626	75400.4	78329.4	74740.3	95900	91120.8	90212.2	83221.5	84375.6	85833.5	428477	88190.8	84857.4	76209.8	80585.7	78566.1	68797	80139.6	90515.7	87059	88666.2	82302.6	85119.2	83234.1	85982.6	72276.3	95232.7	85415	30756	23890.4	28598.9	28030.5	30680.7	26640.7	31462.4	30871.7	29540.2	71227.6	31599.3	28891.9	27082.7	32426.8	30778.9	31051.3
412	271.137	363.322	32963.2	31807.3	31593.8	31698.3	32293.8	31846.9	30579.6	4376.07	3048.02	13685.3	6023.98	5781.56	8882.66	6656.89	9631.7	7865.23	20552.9	2849.02	13229	15156.2	3466.82	6466.92	7618.33	3696.61	10574.1	4339.41	11129.1	4871.98	24064.8	6184.76	6225.26	1782.65	4197.68	4911.3	2645.5	2768.28	5644.17	3276.34	502.814	11241.9	10485.1	4536.64	5546.89	3816.04	3424.17	4632.28	2901.57
413	271.263	795.691	4672.14	4365.1	6218.31	5079.77	6128.01	5711.75	7007.88	732182	483377	469391	326651	448990	608258	21571.7	243768	390712	549913	2.02532e+06	319267	447720	50149.7	391249	395815	510216	294411	507143	419622	231295	427303	55155.9	46425.2	5755.58	4745.34	4346.49	5239.68	4939.05	6137.11	7029.76	5690.93	6140.14	378578	6766.28	6248.55	6987.61	7544.52	5970.03	4550.89
414	271.141	404.848	11780	13515.4	15189.1	12931	13968.8	13840.6	11843	605.652	215.283	103.339	283.452	812.024	603.464	1689.84	561.567	765.381	1329.49	680.643	884.251	734.175	184.922	605.114	308.762	238.611	1031.5	478.685	1473.19	906.117	610.573	542.556	242.552	105.796	0	261.224	165.425	432.883	231.634	107.867	245.948	231.021	1934.88	224.541	102.167	105.877	110.938	102.067	123.224
415	272.199	511.824	15072	15552.3	16168	16146.1	16240.6	16597.6	16441.3	25934.9	24514.1	25561.2	23900.7	22956.7	23087.2	92551.2	30159.2	24243.5	57277.8	18087	21525.9	16104.5	15833.2	23423.2	22442.2	18521.5	22642.9	22866.8	24332.8	21987.7	16037.3	31269	20113.2	13000.5	11462.5	12302.6	10771.5	9033.5	12953.1	9906.53	8729.76	8711.1	16903.4	11122.3	12036.4	9404.91	12687.6	9163.88	9920.05
416	272.267	795.551	566.011	0	812.229	617.136	1155.8	1013.3	5018.67	138869	88101.5	84304	61498.3	80621.2	109119	4780.4	47908.2	74406.1	106402	372054	61998.5	81905.5	5896.54	70735.9	67567.8	93248.5	57335.6	92184.7	78789.1	41174.1	81879.3	8481.33	8924.11	494.711	103.92	460.364	214.547	565.956	630.739	990.46	614.338	1336.27	70420.5	1271.48	846.713	705.243	8732.91	1027.26	456.603
417	272.898	37.7917	11488	12472.7	12806	13202.7	11446.3	11401.6	12708.3	15885.2	15981	13600.4	15690.1	15670.1	16934.9	19495	20665.1	16513.8	29461	16379.6	29561.9	16724.9	14377.2	18742.7	16844.2	10610.6	16412.8	15937.3	21216.2	14657.4	21188.1	17068.5	16479.7	13454.8	11909.4	12644.7	9324.42	10974.7	10869.6	13294.7	10646.6	14145.2	24083.7	11094.1	12399	12604.6	13490.1	12332.2	10795.7
418	273.17	366.423	207104	214140	214476	215152	211955	211636	212734	973.272	7485.32	1111.49	1488.58	1510.55	453.7	3620.3	1514.14	1805.82	2088.48	964.42	1245.97	2185.13	1483.32	7616.44	1628.59	943.42	1499.71	986.951	2715.92	9553.82	2255.48	1529.84	1433.85	2569.79	3250.82	3097.6	2962.64	2950.59	2446.39	3255.98	2745.38	3152.98	2255.29	2451.23	2653.14	2006.12	3057.04	3230.11	2652.42
419	273.253	499.506	11816.9	10519.1	13273	12720.8	13502.8	11725.2	13200.4	3710.41	2436.33	2636.79	2297.23	10442.1	2862.24	21898.8	14030.3	15202.1	15317.3	13310.6	9663.83	24147.8	1492.63	3491.76	2163.22	2479.82	3140.36	17885.3	45898.2	2784.31	40147.5	3702.33	2524.84	22592.2	17536.9	20506.9	18855.1	19901.6	20735.2	17138.7	19134.4	13201.7	30030.7	18930.5	22208.3	14226.4	26853.7	17366.9	18633.6
420	274.174	366.311	34406.7	34491.5	35173.8	36537.8	34864	34992.3	34643.9	2990.68	1996.94	3682.35	3457.2	2597.23	2820	5388.6	4785.46	6400.7	5201.04	2855.78	5607.3	4752.29	938.497	2118.21	2729.76	2723.21	4773.51	1696.46	21404.3	3559.72	6829.17	16912.6	1772.65	1115.03	2181.96	1409.25	1554.39	1861.12	1737.59	3599.81	2874.81	31964.2	32201.8	2442.18	1534.73	2126.99	1598.65	2962.49	2748.81
421	274.201	613.86	30808.3	31041.1	30910.3	29113.7	30336	30717.8	30135.2	307.291	255.609	0	0	106.989	123.639	313.378	259.607	175.876	166.302	163.024	0	116.759	0	0	0	0	0	0	464.928	143.81	648.609	0	0	244.461	0	99.1342	233.939	115.233	234.599	0	257.502	104.24	126.566	231.716	264.733	0	107.255	287.395	103.691
422	274.275	507.574	294537	291918	293312	286414	289087	295034	288647	1.48541e+06	2.20732e+06	1.79006e+06	1.40839e+06	1.6706e+06	1.52251e+06	2.01711e+06	1.88807e+06	1.72432e+06	1.23371e+07	1.51634e+06	695879	829934	1.64508e+06	1.28974e+06	1.76554e+06	1.40558e+06	1.66667e+06	1.7191e+06	1.28356e+06	1.90813e+06	534580	1.08607e+06	1.29875e+06	429850	373093	360175	403169	215234	334531	627653	382659	649776	607099	263154	351799	340962	481858	531178	535244
423	274.876	38.8891	10067	10561.2	10800.6	11957.6	11656.2	10674.3	11967.2	19284.4	20311.7	17729.6	21420.5	23309.2	19935.8	24657.8	20367.4	21690.8	37810.4	19885.3	38350	34440.7	18492.3	19191.9	22115	16439.1	21001.4	20107.5	34381.5	19195.7	33048.6	19106.2	15257.6	11376.9	11437.6	12178	10947.9	11066.6	9830.78	10428.2	10633.5	14539.1	35416.6	10743.3	9980.19	14794.7	10087.1	9170.21	9873.68
424	275.188	468.649	1.8996e+06	1.88696e+06	1.86489e+06	1.90125e+06	1.88425e+06	1.90367e+06	1.89302e+06	2886.84	1588.58	1663.17	1815.96	2751.09	3734.93	4977.3	3766.03	4020.75	5220.67	3080.86	4863.13	5166.35	1438.98	2826.81	1855.95	1573.45	2588.98	2160.37	5386.5	1928.71	4935.11	1760.23	1991.95	3411.26	2510.69	1556.72	2582.97	2004.29	1431.98	1720.51	2180.84	2149.85	4297.78	1448.96	2010	2430.31	2412.1	2787.31	1648.05
425	275.278	507.816	51586.1	50737.2	49928.1	51965.9	51769.4	49860.2	51866.5	264836	389219	313164	244795	295542	261329	352184	327871	306126	2.08999e+06	262868	124188	146074	286744	227583	309794	242362	292765	303601	225444	338522	96632.6	193816	229436	75732.7	67340.6	63147.7	68940.6	38550.3	59373.5	106957	68808.3	114594	109162	46957.2	60399.6	60077.8	83397.2	92580.4	94734.3
426	276.189	468.708	276217	275967	280236	284153	280906	283039	281510	1197.49	228.165	653.506	1187.13	983.931	768.564	2144.22	1095.95	870.043	2322.91	405.489	1527.84	836.69	590.98	657.697	1161.07	247.705	1496.8	612.384	2123.17	603.272	2070.04	828.328	565.831	788.086	1734.61	902.549	2413.52	1404.79	677.773	1871.56	602.605	1463.27	13089.1	1487.5	1268.27	1321.5	963.563	1840.95	1003.44
427	276.104	59.0168	7440.72	9133.13	8386.28	8171.51	8355.57	9958.79	7521.86	51889.4	33989.4	23920.7	32314.2	34305.1	38430.7	46981.8	55344.7	82638.4	16365.6	100495	27497.1	21182	46474.2	59318.1	65271	27243.5	67161.6	54095.1	17182.6	75594.3	37535.3	45658.8	72298.9	2073.19	4946.99	5243.27	11147.6	5848.18	15250.7	4550.11	3441.42	6651.29	13925.8	11631.1	6684.55	13994	7187.05	4181.98	4486.27
428	277.081	335.016	16855.1	18449.3	16978.7	17224.2	17157.9	17440	17725.4	42459.7	40792.7	48312.7	44203	41213.8	45103.9	238511	46635.1	40233.2	32307	42717.6	26380.9	20666.4	43221.9	42222.1	44558.9	49772.7	40478.3	45982.2	29569.8	41900.7	32900.8	39739.2	44964.2	17312.3	16971.1	16059.9	16781.2	16671.4	16708.4	15175.3	18798.1	16014.3	19411	15653.1	14802.3	16823	17296.1	16059.9	19338.7
429	276.919	39.972	9066.35	7237.53	9780.53	9379.08	7810.35	7272.9	7589.62	14901.9	15279.2	14858.3	15266.5	16512.9	13091	18735.2	15861.4	23634.5	27439.3	23194.5	25565.1	23866.7	11975.7	13960	13853.5	14279.6	20671.5	13551.6	25340	14031.2	24539.2	15062	13450.4	7803.45	8030.06	7260.47	8065.01	7474.3	7042.53	8693.67	7417.93	9525.25	24304.1	7825.07	8592.77	9419.23	7297.4	7043.82	8331.58
430	277.181	690.513	40826.6	41738	40611.3	42698.5	42048.3	42133.5	43189.5	50078.5	56446	54383.9	53703.4	56663.6	56347.1	206175	70970.2	60882.9	56408.9	48128.1	56776.3	42358.7	22553.2	43010.2	41128.9	42415.3	46509.8	42954.7	49887.4	41833.9	53923.4	53658.5	41419.7	39107.9	37914.3	39081.8	37478.2	40321.4	36370.5	39687.6	42066.4	40344.4	49264	40663.3	38177.5	36209.1	39726.4	40145.4	41165.3
431	277.191	468.599	38793.4	37795.6	38089.7	38339.8	39325.2	36708.8	40303.6	3774.63	2628.89	3681.7	2580.44	2083.68	1950.45	7167.34	17399.4	4228.88	5320.48	4441.22	20836.2	3697.81	3934	3745.62	2897.03	3518.21	3801.58	3896.84	19395.9	18591.2	5133.49	2760.95	2650.28	731.042	636.283	964.09	1004.31	343.708	528.246	479.269	573.55	284.973	51455.7	460.402	427.863	834.974	1268.04	1433.49	706.412
432	278.192	689.158	6869.97	7533.16	11405	12567.6	12819.9	11547.1	12028.6	11479.3	14509	13428.5	14216.9	14097.7	11246.6	50187.7	17921.2	14916.4	12922.6	10984.5	13290.3	10594.7	3248.36	10221.6	10102.7	10705.2	11611.3	11826.9	12906.8	9348.41	14437.3	13367.2	8400.52	11924.6	10945.8	11614.9	10585.5	11658.5	9890	11147	11293	9541.12	11377.1	11845.7	10739.8	10401.5	10484.8	11348.8	11858.9
433	278.196	403.523	17756.4	17432.3	18577.1	17583.6	18007.1	17938.7	17216.1	524.047	582.744	911.952	344.819	578.283	318.807	1367.58	0	662.935	754.167	465.609	689.537	1439.71	607.402	363.468	334.909	572.93	768.645	130.843	1436.19	351.681	3254.96	362.154	564.574	231.655	480.33	239.856	327.005	0	213.057	106.973	102.77	114.251	1293.89	346.308	106.052	225.759	363.965	391.972	106.481
434	279.087	342.801	10014.5	10595.7	9025.73	10426.4	10287.2	11027.2	9645.55	24253.8	21514.9	2751.59	16512.8	17680.6	19748.6	84759.1	46697.3	45498.1	25156.2	76668.3	84712.3	92407.2	35458.4	21521.8	27593.1	48878.4	97913	37313.3	117560	101756	61655.7	14086.5	40234.1	11784.8	16714	3551.08	37548.6	17757.3	8656.8	10287.1	20041.9	42810	74599.2	10893.4	29527.6	37496.6	8088.53	3845.3	17745.4
435	279.101	121.832	5681.13	5588.13	5812.14	4642.28	5266.43	5428.06	5936.06	4861.47	6061.47	9795.46	9779.01	8048.01	4468.8	9508.56	15308.4	22658.4	17906.4	12769.9	13861.5	25029.8	6071.93	7142.68	6436.51	4196.85	13811.8	11241.7	38480.7	6262.36	14489.6	7067.77	4693.13	3638.91	6550.13	5344.72	5214.8	4996.2	5381.46	5378.16	4053.22	3301	33025.9	4124.44	5467.48	4221.55	4066.9	4812.12	4307.74
436	279.16	708.797	231914	229611	243269	256969	255304	259684	259356	397543	388710	378320	351097	358980	351393	1.57724e+06	475307	421056	460000	263722	401600	249403	164241	295191	273883	291969	365098	329638	360392	283854	326597	360119	276222	193571	190421	210004	196450	206600	188650	211279	212788	213333	358320	202308	205479	201151	227883	203730	208579
437	279.174	315.198	22888.1	21709.5	23137.1	23699.6	23591.3	23411.5	24480.9	28214.3	9572.9	14025.8	29634.3	29644.8	32745.6	29499.5	53372.7	41780.3	93792.5	21176.9	52533.2	89301.9	19769.3	34028.9	21464	6096.41	17156.4	25225.2	84254.9	45535	22502.2	11760.7	19347.6	16525.9	52364.7	22270.3	31511.3	34629.4	35582.7	42143.9	35562.6	32573.3	45707.3	40486	28496.1	43171.5	30900.3	10770.5	25857.9
438	280.093	39.3506	51897.5	51479.8	52064.8	50499.2	54136.8	53436.2	52261.5	330957	518015	336088	519322	544815	369249	516447	573349	882702	727749	525005	492853	555386	416472	537328	464043	263011	486714	468805	578764	495060	431806	404312	326242	102487	93246.6	70208.1	88221.5	55279	79196.3	57422.8	52302	61953.3	547000	65607.8	109168	179639	72825.5	69091.7	70893.9
439	280.167	708.3	42892.7	39347.7	45698.5	45873.8	46719.2	45693.4	49017.1	67960.6	64915.3	65442	64595.7	62616.4	61688.9	277828	84702.2	73361	91573.6	47195.4	70611.8	44050.1	26525.4	48164.4	48582.3	46018.9	67528.9	61894.9	66664.2	51761.4	54235.5	59390.4	48296.8	38788.2	36255	40539	37467.5	38815.9	37118	39315.9	38411.8	41568.9	57349.4	40109.6	43995.6	40765.5	44160.7	41058.5	38085.5
440	280.262	750.169	40737.1	41849.9	44529.3	43770.4	43862.7	44931.9	44186.2	6407.49	17481.8	8302.97	24823.9	8755.55	6128.92	59301.5	21721.1	16818.6	43673.8	11406.3	5353.74	5097.75	4736.51	7809.01	1165.13	6419.16	21061.9	32884.4	21996.2	9823.88	5463.49	8091.69	5640.27	21984.9	30476.2	29150.7	17843	18374.2	24694.6	19519.7	19618.2	24987.4	3962.66	20264.7	57203.1	21757.7	32329.4	21974.8	24798.2
441	281.127	245.115	38335.4	39549.6	39699.2	41048.7	40572.2	40306.2	36538	35345.9	48019.4	19778.1	43362.8	54246.6	40231.7	86378.8	48385.3	42903.6	165486	49422.2	164489	92185.3	57933	34629.8	60019.2	13771.2	108670	39304.4	153173	57949.5	41416.9	63608.5	16067.5	23793.3	35206.9	19538.9	55135.1	34696.3	34042.8	27486.9	24527.6	41607.9	121024	58979.9	37097.6	39267.6	34311.8	12007.7	24706.9
442	281.142	582.189	32430.4	30764.7	31109.3	30508	30138.4	31237.1	32022.2	42924.1	35840	37338.5	36098	37647.3	36973.3	50377.7	41691.3	45117.1	148406	34478.7	48767.4	35858.5	15899	33278.9	33718	33101.8	39951.6	34392.6	71330.5	28748.3	44048.8	27836.9	25862.5	35441.9	29758	10717.6	29208.5	40640	35574.6	36323.7	38206.9	40841.6	47327.1	35810.9	6890.13	34562.3	9192.24	38175.5	27336.4
443	281.248	807.61	82719.6	29288.3	33801	38840.4	38654	39770.2	40387.2	31210.7	15863.8	32179.4	26833.1	33256.6	42994.4	14747.3	91843.2	40043.3	127032	724412	66539.3	65420.8	24684.7	22154.4	0	58795.8	40554.2	34177.3	28187.1	48306	30831.1	36649.7	25097.6	23688.9	29078.1	27974.2	27484.3	18658.4	27032.1	24794.9	15544.6	37105.8	21609.2	22862.7	23820.7	34996.6	53562.4	42706	18997.7
444	281.113	38.7526	10636.7	10517.3	9779.83	10835.2	10569.8	10158.8	9817.04	38177.8	54511.5	38571.1	52033.9	56367.9	37914.4	58009.5	59190.6	87881.3	122504	45381.9	112301	132016	45019.6	55820.2	47069.5	37297.4	48001.7	49067.3	120697	48813.2	123242	41711.5	37360.1	16060.4	14931.4	10743.9	14234.4	8665.34	10996.9	9709.78	9944.76	10340.9	126263	10702.7	13916.4	19842.2	10909.5	11739.6	11709.5
445	282.279	805.53	241096	255387	282928	292302	299391	303455	299596	27792.2	53329.3	29542.9	138925	21161.5	24433.8	216096	40824.1	50063.3	227225	99569.5	18721	6202.85	14747.5	16670.2	9085.03	22606.9	129212	172315	119201	70340.3	18892.3	21501	16545	154221	238515	246461	81222.7	99847.7	170217	130533	140189	233476	13772	140964	517143	149589	185386	147991	205428
446	282.242	605.988	15183.6	20468	12923.5	16815.6	16469.8	15628.3	20515.4	7993.01	219.884	16049.9	143.234	14235.5	122.212	1455.16	361.356	15594.1	106.004	258.575	858.861	627.335	0	292.54	121.374	14358.6	140.594	264.503	11297.5	123.448	346.721	16524.7	130.569	18916.5	19517.9	15280.5	17906.9	22416.3	13726.7	22085.3	23420.4	13970	358.534	22762.3	14032.6	11619.8	16022.3	21605.6	14851.3
447	283.071	369.1	9878.15	11242.1	11708.3	13236.1	11157.5	10994.7	12558.9	2889.45	15191	2519.07	3700.07	16193.2	11649.1	8439.29	9805.39	5883.73	9844.68	16882.4	29070.6	44673.2	3184.37	13901.8	6332.84	3528.1	18472.9	4250.09	44074.4	10727	34847.6	3430.11	4928.68	1384.29	2808.79	808.825	2397.82	2338.48	2822.77	1634.06	1736.13	2442.34	23459.9	1009.27	1787.96	4798.62	1074.66	3262.8	1167.61
448	283.264	16.8023	19969.8	0	20250.1	19388.1	0	20168.1	20422.5	24163.3	25711.7	24302	22672	22271.6	24018.5	24401.6	23168.1	23135.8	24132.4	24268	24122	25749.8	21818.6	23061.5	25234.2	22519	23270.4	22212.2	23684.8	21623.2	24521.1	20644.6	21744.1	19931.8	19205.9	18637.3	19764.4	18615.6	20807	18916.6	16808	17585.6	25079.1	18948.4	0	17661.4	17218.6	19859.5	19079.7
449	283.152	435.823	109425	112162	113671	115011	116593	115537	108011	3306.5	3790.37	3440.42	3696.81	3682.94	3723.07	5782.85	6139.01	4049.04	4211.33	3090.74	3993.83	5083.31	2917.24	3060.02	4548	2194.99	4358.97	2483.64	7923.76	3044.9	6120.1	3515.59	3742.19	1250.33	1895.16	2064.64	1627.03	1692.69	2072.54	843.609	872.599	1788.92	6697.27	1752.72	1601.87	1692.95	1577.32	2707.15	1171.71
450	283.275	788.588	49596.3	49455.3	59996.3	60506	59798.4	59806.2	62082.7	6451.3	9822.04	4858.98	34821.1	10340	7023.22	49956.9	11621.2	11962.8	57129.8	21246.8	5809	5757.37	0	10313.9	0	6741.19	32926.3	39153.4	29732.1	18742.7	4562.46	2584.59	4502.22	33962.2	51432.8	49724.7	19183.2	22403.4	38003.6	28978.7	31296	48901.2	5199.61	30140.7	104660	32290.5	38474.4	31155.9	41273
451	284.158	435.815	17002.8	18169.5	18445.8	16718.9	16062.2	17211.6	16640.5	2586.81	2586.28	3272.62	2678	3349.92	2676.67	2800.19	2780.79	2341.47	1963.45	2926.64	2653.56	2840.7	1934.14	2227.45	2759.09	2111.33	2742.64	2024.17	2393.97	1701	1243.78	2324.14	2852.84	2101.07	2874.99	2347.42	2383.44	1518.91	2062.58	1510.12	1329.47	2131.33	2647.29	1893.36	2060.3	2646.38	2190.64	2079.41	2120
452	285.131	304.357	36755.8	37542	37827.6	39601.6	37670.1	39045.5	40169	1035.78	1378.77	601.446	491.53	967.656	793.845	4268.09	1716.07	9369.45	16345.2	1459.84	18120.9	19260.3	348.446	1135.41	1255.59	676.833	2004.61	1072.05	17216.8	1879.27	14439.8	931.432	982.103	214.661	112.448	0	212.019	0	221.497	245.884	101.572	0	23431.6	98.8131	102.707	227.459	313.193	227.749	150.565
453	285.11	402.952	29527.7	28340.8	26084.8	25766.7	25722.2	23723.2	26241.5	1298.25	1280.21	1084.23	1366.76	1175.53	515.521	3873.18	983.62	1321.07	1268.62	1627.04	2975.38	2206.15	544.841	1170.72	1086.87	558.741	1309.25	642.193	2561.82	523.264	3467.95	1901.28	665.631	562.758	1099.46	628.546	894.043	1090.56	1179.71	818.012	613.478	4974.45	11189.2	790.771	765.056	1155.42	816.5	855.724	212.502
454	285.207	536.96	87467.9	86320.7	84920.5	87077.2	83820	88100.9	84393.8	4897.29	4387.48	4752.01	4374.67	5421.72	4771.01	6329.27	3592.11	4915.34	7283.72	4335.52	4223.97	3574.97	2270.22	3633.89	3828.12	3464.86	3995.32	3715.23	4295.21	2793.48	3139.25	4187.86	3082.9	1902.2	2878.19	3320.91	3011.34	4185.93	2549.7	2861.92	4097.1	5373.32	5302.34	2189.63	3323.35	3056.23	3729.97	4486.38	2532.83
455	285.279	16.8461	30426.7	30018.7	31993.2	32559.8	30674.2	32538.6	31419.4	42963.1	41500	39634.2	38269.2	41598.9	36495.3	45395.6	40247.6	43704.8	39494.7	40650.5	48427.8	44316.8	37255.7	35526.2	36440.5	38919.5	39511.3	38123.9	40851.6	38176.9	40739.7	36695.8	37308.6	32298.7	28019.5	27560.8	30294.1	29964.9	27927.1	28482.9	32805	29621.2	40367.8	32691.2	29049.7	28283.5	27128.3	29893	30469.7
456	286.201	378.599	150041	144228	149637	146575	147194	145278	146720	99310.3	45481.7	301561	151896	36592	80247.6	95574.2	122882	112308	322311	67997.9	147643	177409	49993.7	52538.7	96755.8	101176	103423	54415	105575	54039.5	376500	102926	82199.2	57162.1	121839	115167	39902.9	68045.2	175809	64903.2	61654.1	172641	116274	75056.9	104687	72796.2	55824.7	133676	65662.7
457	287.197	378.799	29305.5	28239.4	29591.7	28088.3	27756.9	28696	29112.6	19707	10240.3	52025.8	27835.2	7510.06	16256.6	20453.5	25572	21614.1	57181.8	13204.4	31503.6	35612.2	9779.38	10233.7	18544.2	19545.1	17678.7	11835.6	24783.4	9808.32	68007.9	18450.5	15034.2	9798.24	21296.5	20189.4	5770.61	13556.4	29638.5	11429.4	11117.6	29620.3	25337.5	15082.8	18622.8	14081.2	9163.26	22620.8	12680.6
458	287.103	281.158	10864	7285.62	10100	9774.36	10831.1	10600.3	7248.72	29929.7	17088.5	7222.07	14159.5	10143.2	11696.8	97321.6	12685.1	15184.4	84667.6	20995.8	103321	19064.7	10683.5	43938.6	13883.6	4200.39	26911.2	24076.7	66991.4	31761.5	21706.6	19067.6	21567.9	11235.8	1368.03	3888.45	10454.1	13953.9	17715.5	17044.5	18721.6	25696.5	20987	3066.75	27144.5	6962.78	4273.38	11689.7	6143.25
459	288.217	415.738	107462	111621	106298	110945	110456	102929	107104	202127	202038	127327	126799	217064	207791	180196	139786	419166	394978	154421	332127	198534	104019	164996	67593.2	65803.2	252590	72757.1	188441	150667	243401	132047	58296.6	47135.2	45124.2	228265	89873.1	64311.7	70401.1	75144.1	54846.4	621064	236164	65240.1	42639.1	73724.2	85487.1	194327	95801.9
460	289.201	503.67	71474.6	71782.8	68190.2	74213	73689.5	72109	71583.5	1093.81	1060.76	1046.98	725.095	1627.95	861.587	2641.86	1179.08	969.883	2200.95	853.51	10271.8	1051.02	855.5	1411.74	1432.69	1061.45	1327.33	213.724	3658.38	946.343	1691.02	1015.59	902.799	642.958	538.974	467.663	563.549	602.947	449.449	102.264	419.019	554.455	8903.48	317.957	379.108	131.709	537.205	661.533	457.567
461	289.219	410.392	18585.5	17002.5	20633.1	19446.3	18703.8	19964.3	18454	32288.3	32761.4	21555.5	23698.8	39223.9	35610.8	34138	22376.2	66903.7	69459.9	26370.8	55954.9	35263.9	18487.7	29958.7	12164.3	11698.1	41785	13157.1	32337.9	24037.7	39187.8	22963.9	9356.6	8810.74	7613.82	37511.7	14821.4	10887.2	12160.7	13799.9	10000.6	96955.1	39213.5	9875.09	7148.24	13220.6	14774.1	31265.5	15516.9
462	289.201	562.984	16250	14836.2	13595.1	13832	14103.6	14994.7	16020.3	3442.74	2737.44	31619.8	979.35	3678.3	1908.61	21098.7	10471.9	2823.07	7322.83	1807.59	6885.41	7849.95	0	2389.71	1486.66	1466.28	2321.05	1485.61	5848.48	1124.92	26089.8	1789.44	916.351	1424.44	8538.18	238.947	765.518	637.123	1582.02	603.24	335.485	645.89	16380.6	827.868	573.224	669.545	778.869	904.804	630.728
463	290.26	509.157	16558.1	16977.9	16881	16927.1	15644.1	18391.5	17927.6	52959.9	48406	41049.9	32352.2	36357.6	40693.6	59829.6	47209.7	42538.3	565771	34254.1	179641	120000	31414.6	31237.2	40019	27597.5	42545.3	36324.5	169945	44427.7	61044.8	33322.8	33623.8	8161.56	14603.9	21483.5	23108.9	8784.14	11809.3	24626.4	5490.99	9166.58	118842	31157.3	9131.19	10180.9	11921.2	10720.8	71216.1
464	291.177	366.075	19013.6	17830.5	17874.6	18222.1	17294.4	18331.3	17506.9	1264.56	1853.15	929.415	1021.01	1751.57	906.225	4279.88	2067.25	1667.42	7612.32	2078.93	3136.02	2548.54	1140.23	1613.57	860.394	1082.31	2457.99	992.281	4488.31	1050.46	2320.08	851.182	1277.02	0	558.804	364.043	350.113	225.876	448.623	225.369	376.414	461.506	5222.82	359.154	443.136	612.679	114.958	355.272	629.999
465	291.119	405.003	8064.16	8842	9015.79	8046.22	8900.32	9151.95	8141.45	939.71	754.82	563.171	944.144	258.889	759.965	2319.68	1240.14	648.499	871.721	901.904	423.508	806.097	845.715	441.854	321.87	559.09	1147.65	365.791	766.374	853.29	1366.93	1658	237.503	237.29	0	733.652	0	339.912	116.245	219.336	213.372	214.294	1843.69	115.038	98.7541	223.856	106.326	213.964	0
466	294.156	94.7666	3494.36	4293.49	4064.73	4055.05	3738.09	3618.93	4111.87	14832.6	30240	16025.7	25905.1	29734.4	13091.9	32721.2	43099.9	65407.9	27720.1	30001.2	27931.8	39924.3	22500.7	18859.6	18022.4	11524.2	41630.1	28879.7	45498.3	27806.3	23378.5	26924.6	22376.8	3843.4	6039.25	3490.32	4976.58	2902.9	5153.92	4119.37	2945.76	3852.12	38780.4	3655.07	5649.85	4463.77	3669.01	3656.01	3915.86
467	294.939	37.0995	75268.9	72618.4	78476.5	80217.4	82506.6	81845.6	77809.4	98073.4	96695.8	100512	99301.4	95826.1	95835.2	103702	99697.2	97871	76223.2	97909.6	78093.2	75083.8	93839.4	91438.7	94801	94910.6	89460.6	95890.1	72171.1	94846.2	75908.9	95941.2	93178.5	79877.4	73391.8	75927.3	75317.6	79782.3	74905.4	74478.3	79534.2	78680.3	73353	78387.5	75618.2	76349.9	80242.2	82778.4	79729.1
468	295.133	264.276	8015.47	7751.5	7410.38	7315.78	8030.19	7478.21	6988.08	7855.55	12333.3	9850.6	12990.6	11147.9	6602.44	14546.8	12376.3	24148.5	19971.3	12508.5	20391.4	29533.4	7679.4	7711.31	8828.2	7930.69	15081.4	11302.2	37620.8	8843.17	29378.1	13550.4	6808.62	4608.17	8407.67	7860.57	4258.75	5842.59	5961.88	6089.19	5331.46	6000.8	32259.5	4919.25	7110.38	6603.51	4805.95	6456.38	5897.2
469	295.153	455.072	12753.1	12585.8	11511.8	12870.2	12318.4	12611.6	12279.7	3250.88	3392.09	3370.58	3750.98	4033.09	4033.98	8461.26	5215.08	4930.21	6676.65	4254.21	6817.86	6990.74	2401.05	3429.25	2865.84	2087.4	4994.97	4691.89	8597.38	2138.57	11136.5	2652.35	2677.79	1480.97	743.601	978.384	1710.74	627.09	2267.25	1841.47	1276.42	1069.95	6467.12	1452.21	613.2	1080.29	1417.99	3457.96	2434.22
470	296.068	39.1672	5577.64	4993.97	5845.78	5470.59	4790.49	5865.42	4674.52	34311	47795.9	29435.5	40544.4	50370.5	40745.2	47238.2	48871	69559	72378.7	48730.9	65580.5	57736.9	34846	47160.8	37480.3	29439.2	42582.1	39336.6	62335.8	45401.6	47956	35623.9	35141.9	10065.5	8782.24	8162.53	8406.55	5689.08	6619.1	5747.44	6071.99	6400.03	56601.4	5580.53	13074.5	14748.9	7834.48	7225.36	6583.47
471	296.258	774.283	26856.3	28344.9	29913.8	31090.5	32322.4	35425.8	33395.7	21555.8	27216.3	31759.4	19990.3	40763.1	49116	83974.1	45616.6	62666.8	70856.3	31139.4	13268.8	12940.6	14106.5	26880.7	0	8910.83	13645.1	15557.6	4740.16	8644.45	24042.9	17480.3	20615	14356.7	23720.3	23026.8	15569.6	13870.1	15327.4	21547.9	9180.49	42417	7945.75	16431.3	18763.3	29190.1	37841.1	33815.8	13158.1
472	297.147	639.509	44788.3	49404.1	49897	50631.3	48139.1	48917	52352.8	35849	27847.3	34694	32960.4	34931.2	29700.5	46050.5	33663.9	29756.8	837.25	34157.9	15203.3	5107.25	18831.1	34152.4	30657.4	22054.7	31549.5	21336.4	24436.9	25319.5	37544.6	30659.6	23427.7	74863.1	88584.2	70440.1	75153.9	67496.6	69240.8	69071.3	66332.2	70527.9	19039.3	71692.1	72706.9	73676.5	77289	80001.4	73761.6
473	297.169	470.298	953144	937949	942108	945251	951352	960390	943036	2849.1	3441.11	2142.35	1745.14	2632.06	2320.97	6212.04	3782.47	4014.98	6237.28	2206.15	34057.5	47270.8	2105.06	3209.76	3194.37	1225.68	2488.76	2788.5	80399.9	2528.66	118566	3374.96	2158.99	2454.88	3133.41	1062.34	2680.45	1588.72	2207.49	1706.56	1894.51	2155.83	66443.9	785.78	1650.34	1242.76	1410.93	1565.56	1614.05
474	297.193	762.73	12007.5	14456.2	7173.49	7954.84	7333.14	7826.59	7813.25	38414.2	40786.7	19015.2	18938.9	57124	37232.8	66466.3	34386	56128.8	167083	36911.5	7997.55	16605.2	9762.69	75673.4	0	15209.2	39382.6	13000.3	25256	10691	12375.6	15469.8	10566.6	10656.6	12336.5	13047.4	16833.9	10465.7	17265.5	17959.2	13587.5	18114.9	17624.2	20544.5	15148.4	12726.5	23870.1	17920.4	7921.18
475	298.172	469.73	144326	147711	141202	147525	141790	143830	144015	6444.36	6097.96	6374.56	4707.16	5937.99	6444.68	6701.73	5835.59	6149.21	6749.33	6590.41	6009.51	5798.24	6690.29	5044.49	5501.47	5899.95	5271.43	5261.46	11206.3	4868.36	19008.3	5964.38	5114.35	3358.27	2722.8	1942.34	2255.29	2153.8	2439.19	3037.04	2380.8	2508.21	5288.69	3290.95	2683.46	1870.44	2098.07	2786.13	3569.53
476	298.274	812.713	28902.6	30553.6	38497.3	41188.2	38393.2	43160.6	46352.7	34071.8	52389.7	10218	24454.1	11720.4	11584.1	17447.6	17656.6	15939.6	256367	40808.5	464.997	13405.3	0	11297.4	0	0	9919.4	9030.25	895.419	0	7972.33	0	6870.71	26302.5	33710.7	27895.6	24941.6	22822.9	25345.3	32820.4	17060.7	47184.5	578.772	23746.8	28053.4	35271.6	50510.7	47795.2	20261.9
477	299.144	341.427	35160.9	32580.9	34645.2	33106.1	32499.7	34059.4	35332.4	10035.3	11818.3	12370.4	11198.9	13808.8	12419.6	52198	18766.2	17780.4	15972	14832.7	16662.9	15711.8	13652.7	11999.5	13205.8	10978.5	14210.4	12427.7	17902	12129.6	18965.1	10284.7	11336.3	5593.6	6289.04	3977.83	7683.3	6580.03	4861.58	5938.12	5428.14	7899.25	14634.1	4249.02	5704.46	11563.8	5323.27	6138.63	4207.44
478	299.168	680.901	13599.7	13960	15635.2	15398.9	14701.9	14951.6	17767.1	7871.8	31386.2	26966.3	27985.3	8970.12	36339.8	75310.4	41573.8	46015.2	6802.29	18747.2	31161.3	18372.5	4535.71	12234.9	24747.7	18589.8	8032.46	14264.1	20755.3	15053.5	23009.2	29073.8	15626	13084	14375.7	13619.8	13135.6	12592.7	12196.3	12519.5	14973.1	15189.3	21855.5	15087.9	13169.3	14288.2	14836	14953.8	13896.8
479	299.175	469.647	22550.7	22163.1	21784.9	22379.9	22387.5	23033.5	20657.2	5548.44	4290.21	4407.85	4150.98	5622.39	4666.54	3605.64	4168.43	2581.98	4312.89	3890.28	6157.91	3722.97	7963.51	6506.43	3761.86	4070.85	5033.92	3102.86	6145.77	4591	5140.03	6412.14	3287.76	971.548	1071.45	1164.27	1198.42	1021.53	753.939	940.671	1582.03	1576.01	4186.57	2034.26	723.507	914.453	552.886	1477.56	1150.3
480	299.19	591.084	16475.8	34300.2	35476.7	15731.5	16473.4	33921.6	34923.1	66804.6	115690	46634.7	44708.9	156553	35625.2	87435.8	59505	175523	98913.1	96565	123595	167666	84080.8	113065	91091.2	83207.2	130726	70948.8	327048	28329.5	562530	47863.5	48709.6	20714	16136.7	14802.6	21472	13428.4	33599.1	29859.4	17873.8	25740	288931	27368.3	32891.5	22133.2	25050.2	21868.6	17908.8
481	299.193	776.882	42091.7	39970.6	41191	43100.3	42060.8	41702.2	41673.9	147875	184821	31138.4	187534	324329	229834	134026	180166	263241	1.91763e+06	225807	128776	212047	95648.2	218255	76313.9	111424	223956	93239.4	319359	118769	109596	133970	90714.9	41866.1	14174.8	40353.4	95377.6	10154	66196.3	12618.2	58419.2	14012.2	206395	79468.9	9296.51	12544.8	77193.9	13813.3	29285.6
482	300.25	579.559	11473.7	12075.1	12866.2	11060.4	6671.2	12784.4	13284.1	29482.7	39372.8	36690.3	23563.6	49099.2	20634.5	37919.5	29345.8	32474.6	72238.6	41024.5	26139.1	34248.3	13675	34264.8	32929	37608.2	42235.2	18074.2	67058	21823	105685	30191.6	24790.1	13425.6	7100.58	7844.33	15028.2	10445.8	17278.6	9450.25	15385	16592	57462.5	18001.9	7695.4	11758	9590.86	16132	8355.18
483	300.192	776.409	8976.58	5109.3	10181.1	11324.4	10260.2	11693.4	7152.32	24648.6	39220.6	4907.81	32901.5	60558.5	40609.7	30975.4	35825.1	52166.4	332009	50008.9	22610	39080.9	18204.9	42381.4	10881.2	19864.6	39013.5	18532.3	56852.1	19372	18760.3	25083.4	18536.1	10122.3	13758.6	9085.92	19787.2	9870.48	13825.4	14662.8	12791.3	14590.1	35015.4	16967.1	14390.8	15108.8	17882.9	12684.8	4428.05
484	301.142	708.762	44489.5	47270.1	55053.7	64364.6	63814.4	65287	68042	175004	203428	163400	158309	159627	139462	724651	299310	251026	207652	75788.3	162318	80176.4	27184.1	88552.3	81838	88411.7	136458	142220	137893	102930	125460	151274	98221.6	37976.2	38387.9	41084.5	39984.3	43536.7	36362	44953.2	44602	42091.6	140498	41836.3	41617.5	41944.5	49437.3	45813.5	41318.3
485	301.119	390.478	28722	26739.7	26779.3	28933.6	27636.3	28822.4	29286.9	46243.3	104962	29386.8	50310.9	112026	58343.8	89337.9	140891	107472	137548	102580	192146	285087	51792.8	77282.4	89257.7	45114.3	112664	57968.9	271883	62556.2	127339	48870.6	74652.2	16192.4	27414.4	19468.4	36668.1	29511	35524.3	19533.2	17445.9	37853.9	141173	15248.6	20806.7	65437.5	19348	33614	14199.1
486	302.215	522.403	13350.6	13651.4	13027.9	13883.8	13048	12853	13903.2	17189.5	17130.7	19544.1	14193.2	24787.8	20463.5	17303.1	39220	35856.8	135199	22907.3	22841.2	14378.2	20796.8	12940.7	35908.2	21614	33617.8	16381.4	23883	25018.7	16590	32942.4	24179.5	10856.8	16349.8	8862.81	20256	14415.9	9188.05	15393.3	7807.17	18914.2	16939.1	9016.45	15169.8	18792.6	11793.9	15576.7	9472.35
487	302.145	708.765	7252.3	7974.96	8439.28	11369.2	10924.3	12652.9	12849.7	29453.1	33749.5	28521.3	25639.9	26355.5	23238.7	125230	50889	41462.7	36299	12761	28032.5	14218.7	763.75	15942.6	14725.8	15201.1	24639.4	23966.7	23556.5	18064.5	22687.9	25263.1	16147.4	7098.07	6689.16	6789.12	6704.34	7732.91	6888.18	7847.25	6666.58	5449.3	24947.4	7279.95	7230.54	5760.72	8960.69	9339.23	8059
488	302.306	567.822	41183.4	37601.7	39018.8	39260.3	40453.4	41498.4	39308.3	611341	803817	691912	523708	623669	565699	741360	713650	673896	5.43013e+06	584221	150509	198652	547452	483316	625640	514990	620693	635655	402751	492729	153693	425821	488943	141137	99828.8	95072.2	125700	62427.6	77007.4	194373	109603	202683	192643	73376.8	92136.9	87366.6	114712	165331	160891
489	303.305	568.364	10347.5	9644.28	9565.86	9638.36	9373.34	8930.75	10665.7	128100	170474	147516	107677	139090	117167	156839	154208	151109	1.0277e+06	124861	50649.3	81305.1	118322	108272	134165	111459	136432	130427	112219	102567	75839.7	91229.7	108320	28968.6	20409.1	19711.7	26030.3	12137.5	19575.4	39571.1	22878.1	39885	77309.7	14962.4	21227.1	18890.2	25159.1	34255.3	31818.2
490	303.217	536.461	124663	123351	121843	123690	124216	123724	124976	4660.76	3386.15	6607.79	3868.62	3928.93	4103.88	4785.92	9774.51	8924.27	29076.2	5215.65	7722.75	4313.45	2085.57	3507.61	9107.52	2070.33	8984.88	3308.39	6183.52	3289.23	4533.8	5442.71	2450.47	1392.23	1668.77	1317.61	2190.66	1457.47	946.876	2078.93	1581.3	2160.64	3824.07	1330.09	1348.51	1602.63	1091.65	1833.69	2435.38
491	304.221	536.833	23247.4	23309	23866	24194.8	23079.6	23253.9	22011.5	4591.7	2157.55	3593.1	2846.22	4943.04	3398.1	2983.68	4604.03	3419.27	16925.9	4076.04	2299.45	1607.19	1819.12	1834.64	4778.88	3448.44	5206.83	3335.08	3033.63	3927.23	1726.22	4704.77	2463.79	1455.15	1954.85	1087.57	1802.49	2184.11	1008.33	4057.38	1669.15	2300.65	2144.17	9890.08	1553.18	2149.94	1193.58	1907.42	22487.3
492	304.306	568.936	1148.75	2078.85	1396.99	1664.96	1695.81	1741.38	1702.49	15640.7	20119.3	19086.9	13799.6	19375.3	13775	18679.6	18425.4	20596	114858	18317.3	7775.16	13176.7	11943.7	15859.2	16136.4	15355.2	17042.1	15882.1	17674.1	11655	12806.9	11568.3	14878.9	1639.15	1248.92	1468.37	2250.1	894.163	1811.61	2565.3	1337.62	2859.41	16424.7	1431.08	1397.82	2435.2	1571.51	1915.75	3185.29
493	305.245	787.007	8324.5	7000.95	9618.17	10964.1	10570.5	11583.8	12769.4	642.819	1373.59	989.774	6377.25	7518.58	5845.34	16937.8	3061.12	14616	24689.1	624.595	431.55	305.249	0	1122.55	0	687.182	481.22	6772.58	6430.87	0	958.923	0	0	5650.21	5493.69	8016.81	7191.58	5216.28	6406.62	9827.63	5125.93	9452.58	559.43	8823.01	9455.9	8745.06	7772.21	9622.53	6661.03
494	306.227	471.023	21966.1	21957.7	21157.6	22509	21232	19853.2	20763.6	330.934	116.255	532.203	253.494	679.66	339.438	1393.23	240.605	504.501	816.4	104.726	7495.76	931.337	115.138	222.293	101.144	341.607	734.401	384.196	922.939	110.111	1221.89	321.148	351.413	0	233.703	596.19	106.706	103.617	0	224.607	0	105.863	1992.16	271.75	287.333	128.86	226.519	385.028	336.482
495	307.23	557.67	6558.35	6628.64	5841.29	7089.66	6245.9	6767.75	6715.45	13522.2	15805.9	14293.3	13484.3	18385.4	13851.6	49373.4	14875.6	19526.6	21053.3	16594.7	23399	22025.3	10715	16433.4	15606.2	15086.3	14988.7	13877.5	25599.3	12000.2	33127.1	12876.8	12878.3	6367.77	5712.25	6377.91	7023.43	6107.01	6214.7	6638.32	7172.06	6468.35	25321.1	5984.07	6855.59	6323.42	6712.12	6301.78	5460.46
496	309.101	125.82	8983.76	10458.5	9654.25	9545.85	9953.06	9482.07	9929.32	1135.82	1554.6	1229.01	1090.34	650.421	1216.65	831.146	939.212	1200.56	1802.19	1789.14	1227.46	1156.88	1595.23	1153.51	1046.16	1485.43	1162.12	1092.48	970.427	938.022	813.298	1071.28	1311.32	204.56	151.35	209.735	248.772	380.666	406.439	329.7	203.894	325.647	1511.85	115.918	277.938	100.52	98.3348	390.637	147.771
497	310.202	408.344	69940.6	71661.5	71412.9	69591.8	70494.3	67644.9	71141.7	66001.3	38734.8	228065	87535.5	38605.4	83786.3	60081.5	119460	101439	262095	57574.4	137988	120850	35663.6	45476.2	98882.4	58960.1	79016.8	61242.9	87552.3	50744.3	341283	66220.9	73241.3	39713	73753.6	82400.4	22004.8	32378.4	66177	41004.7	30096.7	64728.8	75539	53621.8	73362.1	56896.5	41110	66791.8	41983.4
498	311.182	503.311	66271.4	63323.5	64064.4	63837.7	63134	63478	63081.6	3908.74	3061.21	2678.49	2879.18	2781.62	2744.91	8800.29	3078.73	4778.29	3144.87	3335	5815.27	4905.62	2059.24	3163.6	2661.96	2495.39	2720.95	3132.24	8314.02	2238.9	9379.09	2171.91	1825.6	714.999	970.329	1483.3	1343.29	1259.05	1805.88	1152.19	1184.07	1032.44	5185.9	1136.62	762.398	1254.34	1221.85	833.601	1548.31
499	311.146	362.34	11812.4	11474.6	12290.4	11939.1	13256.9	12677.8	13778.5	842.073	337.952	589.427	225.481	556.011	546.318	3148.55	105.186	591.862	972.601	453.159	460.983	578.564	237.207	331.852	237.36	112.152	510.1	654.891	401.655	771.974	914.049	391.633	713.341	524.9	98.2134	171.977	0	356.43	0	0	102.886	358.537	1258.06	365.701	109.487	104.124	134.326	263.194	117.053
500	311.184	562.951	14843.7	15856.5	15387.2	18145.9	17960.8	16806	16484.3	9481	9693.26	9526.55	7789.08	10161.2	9027.01	39637	10155.8	9591.26	10610.8	8416.16	15558.4	12732.1	3664.36	8662.81	8462.74	8778.21	9429.36	8602.75	12722.5	9854.77	14173.3	9816.13	8486.88	6399.82	4271.13	5804.61	5250.2	5467.31	4526.43	4692.78	5123.26	5477.82	12751.3	4145.4	5058.27	5039.43	5117.57	5130.32	4483.41
501	311.188	798.491	30646.2	31062	33595.6	35139	38041.4	33477	34803.3	148026	182323	52590.8	188652	322766	182781	164011	157056	250887	1.04554e+06	76003.5	96197.8	127879	99126.6	205789	93214.7	116010	261053	120273	303367	103397	115936	135994	101189	30004.5	37265.8	37390	61556	23483.4	46186.1	44589.8	41984.1	56503.7	171353	66910.1	56809.5	54435.4	59981.5	42995.6	24652.1
502	312.187	503.418	10210.1	11416.9	10223.3	11100.2	10087.1	10163.1	10222.9	1213.77	552.003	783.374	565.357	367.632	570.688	2468.08	625.665	554.687	745.337	485.786	221.824	259.114	673.002	526.454	353.22	227.05	218.695	351.899	740.353	226.464	915.589	548.043	264.301	349.451	154.305	103.733	328.922	110.507	0	586.72	99.7839	217.585	898.194	271.559	99.912	273.711	214.368	343.992	0
503	312.29	16.8733	0	0	0	0	0	0	0	53733.5	39722.5	37669.5	34292	34073.6	41277.5	464.295	27377.8	41922.4	56536.3	172647	36569.7	73620.9	24522.3	36711.4	43084.5	34852.8	25209	44893.9	39614	29773.5	37207.8	15052.3	0	0	0	0	0	0	0	0	0	0	33710	0	0	0	0	0	0
504	313.155	329.096	370512	374810	386845	389547	377877	387859	386769	478844	242893	550878	753754	589876	510440	732251	756152	937912	1.64128e+06	704838	1.19482e+06	1.35191e+06	536146	601588	798610	217504	260790	513003	1.9207e+06	682551	1.04985e+06	392975	1.04024e+06	396989	434884	257835	452506	489806	433503	484286	296509	440585	1.11931e+06	584547	394074	436200	392744	249228	537079
505	313.163	366.77	237054	236509	236755	238787	236999	242368	240569	2552.69	2435.86	2243.22	2072.9	2698.96	2087.9	6281.04	3183.21	2261.07	6567.36	2514.47	6576.76	6519.63	1423.32	1625.62	3504.75	1828.79	1861.7	2161.3	7036.73	2369.85	5126.2	1549.18	2752.29	641.092	2145.92	786.987	1618.27	1724.43	1362.44	1084.44	1651.92	1534.16	4764.3	1821.77	1433.11	1523.54	2248.57	213.931	1340.61
506	313.141	469.311	31465.7	32995.1	32164.4	31727.5	30977.2	30878.8	30776.3	0	348.18	234.774	125.452	0	361.231	244.599	246.056	314.448	381.412	0	331.045	214.831	0	236.176	269.842	205.686	133.316	136.264	1277.54	0	365.926	0	404.92	100.239	0	114.074	0	130.226	0	224.982	0	0	879.002	122.716	0	214.523	112.99	0	0
507	314.233	452.966	158669	162298	155586	160715	156752	157738	161217	170413	190017	214128	169097	273876	275968	199406	194726	387166	508616	214103	422103	258833	108086	164002	111209	87549.3	401440	113904	290390	201046	319289	188022	106050	85792.5	98840.2	287087	94653.6	92801.8	119047	89892.3	84951	526851	209401	95856.7	87559.4	91312	106348	241414	95272.9
508	314.158	329.611	74906.6	76656.2	76643.1	79975.7	74099.7	78452.3	74935.3	96631.3	49701.2	110327	153520	113475	101295	144886	155576	184137	317501	135622	240243	267027	105138	115500	159257	44686.6	52744.8	101149	378242	133606	207832	78707.1	204268	74685.6	86639.9	52420.5	86065.3	95704.4	86304.1	94152.3	59018.7	87820.8	219836	108937	81115.6	83041.7	78095.2	49296.4	107848
509	314.166	367.097	37373	37421.9	36182.5	38528.1	36949.4	36273.5	36880.9	2543.87	2734.06	2360.05	3160.92	2088.36	1444.32	1693.32	741.008	999.531	1950.33	2901.4	1919.97	4663.61	3064.14	1023.98	2142.87	2035.14	1840.17	1174.42	2148.52	1612.17	2064.07	1624.22	1329.98	333.438	226.222	229.736	446.863	0	479.369	309.058	0	843.808	511.071	220.434	0	353.854	691.528	244.579	235.681
510	314.779	41.0385	15927.6	14950.5	14933.6	14479.7	15910.2	17138.6	16048.4	20759.8	17191.4	19336.4	19170.6	18853.4	18032.9	23576.2	19492.6	18929.6	40601.4	16961.4	47039.4	37523.8	15925.5	17465.8	20630.2	15948	16537.8	16778.2	36397.7	18536.6	38733.5	16832	15720.7	14560.3	14812.9	15413.9	14333	16135.7	15316.8	15214.7	14363	16494.9	34297.3	14206.3	13663.6	18416	15660.7	15236.6	13622.3
511	315.216	451.632	39025.7	38266.8	36204.6	36108.9	36081.8	36611.1	38011.1	38520.5	47704.4	43437.2	36516.2	63504	57427.6	51774.7	54771.8	83460.8	102384	49906.3	91203.6	69088.7	25989.9	39346.1	29504.3	23274.5	78631.8	27155	72474.3	41176.3	69492.2	40939	30067.6	19222.4	23845.4	55924.6	24302.7	20117.8	27160.7	20246.5	19237.4	105166	50689.9	19379.6	19897.9	26772.5	23476	49942.1	19834.2
512	315.16	330.254	10904.9	10931.1	10513.6	10875.9	11009	9700.65	10368.9	14726.4	7289.01	14120.4	20467.5	15087.8	14623.8	21483.6	21004.6	25833.9	39071.1	18917.9	32673	36400	14918.6	17565.7	19772.9	7035.41	8516.09	12795.4	55411.3	17856.5	28697.6	11998.4	26237.6	9343.58	12196	6630.74	10624.8	12592.4	11389.5	13377	8150.06	11329.6	33133.5	14385.4	10349.9	11361.6	11076.6	7165.15	14780.8
513	315.18	603.14	9781.83	10812.3	9764.72	10351.4	11518.2	10149.6	10184.1	40706.6	67366.4	30587.5	28578.2	90461.1	20588.5	55680.3	40003.6	94282.4	68693.9	54608.7	94793.5	131196	40524.2	63225	51688.1	53025.8	74520.7	41034.9	224956	16851.7	433883	26323.5	25166	15352.9	10840.7	9805.96	15184.9	9413.03	21242.2	17579.6	13070	16508.4	200887	17372.1	19421.5	13816.1	15642.7	17332.1	11852.6
514	315.216	500.614	19506.7	18873.2	18556.7	20771.1	20730.3	18350.3	20060.3	3015.09	4785.61	2075.98	2210.98	5064.12	1996.76	14981	4928.63	4602.03	4572.1	5085.12	4582.04	4142.52	2330.45	3491.91	4806.13	1614.64	4250.16	3028.23	3843.39	2123.72	2641.37	2507.39	2934.99	423.834	801.094	545.938	1007.94	1779.71	1655.57	952.776	625.998	1469.8	2929.38	735.203	868.542	1932.42	1299.45	606.518	544.753
515	316.11	42.8598	12250.7	12575.9	13071.3	12646	12175.3	13537.3	12735.7	13253.8	12750.4	8683.35	11755.7	13952.8	12301.1	14066.5	22809.1	19689.6	18487.7	15434	18592.8	24602.2	12777	8351.08	12586	10706.5	14524.8	12544	22328.5	12869.7	20017.8	9458.23	18433.6	9541.38	12250.9	8895.55	9557.2	13533.2	12150.2	8594.69	8451.71	11725.7	15312.7	10664.3	14167.3	12624.4	10320.4	11336.4	11209.7
516	316.249	481.159	184318	181859	179139	183254	185297	185248	182664	352053	360087	232921	216152	486603	416613	314149	284335	942723	942033	301369	609340	416711	248271	335169	152357	120163	457336	130959	381656	297987	440523	246115	115901	64284.9	71912.9	340837	143247	106236	116634	130247	92419.9	875194	481984	113381	58295.3	116255	157148	361582	147911
517	317.251	481.274	35619.6	34779.1	33445	35656	36080.8	35897.6	33246.1	68685.9	69558.6	45870.7	42303.5	89694.1	80491.9	61343.7	56720.9	177948	184578	59740.8	118797	79822.2	48499.8	66205.1	30049.5	25131.3	86903.9	25837.1	77612.4	58974.4	90146.8	47398.7	25638.3	11729.1	13758.6	62493.7	27655.7	20801.8	21091.6	25474.4	18727.4	164211	91561.2	20383.9	12722.4	21593.2	29862	67786	26544.7
518	317.207	283.738	27883.2	30490.2	30936	29896.5	30945.8	29313.5	32504.7	2773.68	2649.34	1933.22	1770.2	1609.81	1968.12	2280.27	17776.2	2642.28	51206.8	9808.86	92302.5	155294	2166.3	2071.68	2500.65	1609.95	13077.1	1863.02	6607.79	12323.8	88013.1	796.682	16652.3	378.711	435.139	127.879	252.132	655.914	741.642	702.323	118.433	7320.62	48884.2	668.157	433.551	678.515	898.249	477.273	671.689
519	318.3	510.607	59362.4	60945.2	35219.8	36465.2	36866.6	35866.6	35344.7	307036	311615	308633	272502	266755	246294	332018	289164	279810	2.09229e+06	254038	111573	124076	247986	250043	285436	269707	273103	243788	295340	231123	90251.4	208538	227476	51426.7	51305.8	77615.4	53208.6	41789.4	73300.6	107949	79385.4	61760.7	104802	41422.5	59432.8	1.06175e+06	94499.2	43537.1	54324.9
520	318.204	596.864	3460.76	2892.22	2669.15	3239.37	2495.17	3660.87	3720.5	13501.8	22334.2	9794.36	9956.4	27136.4	6567.48	19182.7	11610.1	28981.3	265391	17893.5	21168.5	34134.5	13392.8	20671.3	17151.5	17738.3	24444.8	15135.7	60664.5	6073.74	108017	9771.76	9656.49	3599.43	3106.68	3082.08	3516.33	2501.46	6522.15	5109.77	3140.28	4894.96	51726.9	5007.33	6508.58	4118.74	4190.86	5233.9	3983.64
521	318.97	41.4853	41478.9	43004.4	43597.1	42272.6	44282.6	42712.4	42256.3	45093.9	47790.3	43771.2	48803.4	49145.9	44467.9	61661.4	52123.9	55742.9	78937.2	47659.3	90474.9	77007.1	46802.7	41530.1	45734.5	46174.6	47211	39847	70719.2	44966.3	88148.1	48295.4	52078	39237.2	36176.2	34493.9	40330.2	38139	34664.5	35313.6	33884.2	32464	78866.7	34825.1	35597.9	43292.9	35534.9	38519.6	39375.3
522	319.264	891.08	116.741	131.762	424.584	105.508	366.458	396.605	384.469	22970.7	38191.4	20663	47272.6	37261.1	30233.8	46073.2	58026	84077.9	106384	22192.6	5988.7	0	11628.2	14901	27598.7	18273.5	23502.3	32618.6	17029.2	36440.9	3540.74	29511.7	20805.3	0	201.863	0	7134.34	254.048	245.81	110.916	118.805	0	9016.06	335.159	6596.71	255.86	348.956	7179.72	0
523	319.302	510.711	12399.1	7890.42	7566.79	7291	7365.47	7211.56	7795.21	60209.4	61955.5	63670.6	54874.8	51802.7	49063.8	66359.7	56543.7	54242.1	404830	53195.6	24025.2	28370.2	51283.5	49944.9	59275.1	54046.2	52841.8	49710	56297.3	46508.5	18824.8	43828.5	47076.8	10919.5	5947.87	14938.4	10571.3	16931.6	14539.2	9665.74	16248.9	14368.8	22223.5	6023.72	12270.9	201256	10775.9	9327.78	11540
524	319.15	469.257	6847.9	6954.42	6963.02	7131.65	7026.68	7695.93	7101.48	4349.45	8562.41	2945.65	4320.13	8026.63	4940.88	10327.4	10838.8	8826.11	14923.4	7748.95	17660.9	20137	3310.13	5854.14	6848.31	2662.14	8175.69	5980.02	26353.7	6023.13	14047.3	4076.16	5576.66	659.083	876.612	597.029	1076.99	333.362	868.77	420.127	424.909	550.556	23556.9	327.359	100.351	1177.75	405.193	796.69	326.818
525	320.967	41.4821	25961.1	27684.3	29097.1	28278	27930.6	27898	27726.8	29720.3	30795.9	29951.4	32086.9	31608.5	28165.7	41909.3	37564.7	38025.1	55856	32367.7	55846.4	46978.7	29875.2	24776.5	26442.8	28595.3	32086.4	27478	47460.3	29682.4	58159	31060.1	31836	22432.8	24558.3	20681.4	25340.4	23647	24155.1	23648.2	22373.5	20299.8	49521.2	21979.8	24714.1	28793.5	23599.9	22976.5	26846.6
526	321.106	348.798	10568.5	10129.1	10740.8	9680.15	11198	9970.74	10069.3	26539.7	21217	28427.4	32654.4	24586.9	25301	113337	35690.1	39076.2	26315.9	25337.8	18000.5	15168.7	30684.9	26277.6	23514.5	26764.5	24899	23227.9	28357.1	23127.6	24923.7	23337.3	32816.6	7410.05	8865.4	7899.83	6823.48	9216.14	8011.58	7427.27	9036.01	9096.96	19356.2	7515.16	6619.79	9307.99	9876.94	7372.51	6150.34
527	322.274	802.517	10587.9	10427.9	12881.7	14969.9	15390.1	17092.1	15504.3	7433.48	15487.4	7246.69	11391.3	18209.4	13061.8	22591	19088.9	31605.6	43548.4	8969.66	9904.09	3120.88	2586.3	12453.6	0	7102.32	8098.29	12264.7	9440.49	11184	10449.4	6711.49	6078.79	6993.13	11011.2	11103.4	10985	8076.54	11238.2	15626.5	6852.31	15426.3	9238.38	13560.3	9629.69	12257.3	13697.4	15915.2	9167.93
528	324.276	561.534	2311.09	2777.86	3684.69	2950.12	2927.42	2967.79	3186.09	11268	13134.8	11331.9	10936.2	12215.4	11263.1	32795.8	11163.3	13619.6	32099.9	12133.5	10661.8	9227.25	6296.02	11350.1	10882.8	10434.2	12072	12835.6	11265.4	10455.1	9394.02	9402.33	10002.7	2689.31	2961.34	3531.15	2887.43	3132.52	2679.59	3550.3	2700.21	2898.16	8866.07	2668.18	2878.15	2276.78	2639.65	3782.17	2932.99
529	325.221	698.628	41762.2	40743.5	52110.1	56009.4	57363.6	55789.7	58913.5	6395.05	4663.74	4644.27	4168.49	6156.44	3529.52	27017.9	4975.76	5791.3	141050	9541.72	15715.4	5722.39	0	4310.58	5245.16	2010.94	4182.21	3145.98	24990.4	1837.21	5843.8	6173.95	1226.46	32315.5	32935.1	36458	36534.6	40828.5	35217.4	38885.2	39317.9	41109.3	7739.11	36302.8	40216.8	38583.7	42404.2	42869.3	37621.2
530	325.199	536.936	90972.7	91790.1	89218.2	89176.5	86339.7	88840.3	86199.2	5666.41	4364.72	3703.67	3288.72	3648.18	3036.12	6119.1	4654.5	4489.35	4679.27	3638.77	6674.58	3898.24	1778.63	3307.03	2728.94	2887.42	3219.98	3255.61	7220.03	3069.07	5037.21	5690.9	4067.28	1088.33	320.394	392.824	215.802	772.625	159.161	625.966	754.686	234.518	4828.59	568.886	229.907	347.181	475.827	0	251.773
531	326.202	537.007	17014.6	16337.8	16240	15968.2	14731.2	15194.3	16896.1	1206.21	1427.6	1748.15	1462.74	988.264	1138.71	4002.64	1597.08	1012.29	1924.05	1540.1	2537.23	1086.94	156.365	667.278	581.816	859.187	1136.09	1340.89	1603.79	605.263	1222.67	2053.22	745.72	111.699	340.748	105.452	366.543	108.282	397.463	0	226.837	559.564	1259.77	243.125	0	0	0	272.049	107.807
532	327.048	36.6388	24757.8	24305	25448.7	25329.6	24454.7	24657.3	24080.4	32601.1	35810.1	36584.1	33664.8	35828	22059.5	54502	42382.2	48457.8	37195.4	36875.4	44258.1	57621.6	29825.5	27285.2	26366.8	29776.6	49227.3	39078.2	66645.8	33882	51200.3	34050.3	22168.6	21214.3	25989.5	22432	24917.6	21104.3	30073.9	23493.2	23646.2	24051.2	57111.7	21252.4	29312.6	20061.6	22823.1	23962.4	27247.3
533	327.178	440.899	13652.1	13797.7	12940.1	13031	13252	12731.1	13060.6	780.74	1355.64	512.331	1120.08	1025.67	1199.78	2886.43	1049.32	1102.94	810.721	509.244	859.482	1330.86	1122.84	1306.67	888.525	1170.61	943.714	1598.53	2834.19	826.168	1081.3	1446.14	991.046	911.437	974.705	813.783	1362.69	693.101	830.573	869.323	641.799	761.979	1155.65	341	360.546	377.159	1314.9	106.112	605.274
534	327.217	820.973	34616.8	22543.2	26940.1	31195.9	32415.8	33441.8	34046.8	135605	216097	79929.8	129935	376422	126297	158048	142888	339927	962420	95093.6	77804.7	56526.8	122117	211709	97924.7	123623	260661	123783	320199	79498.8	165548	121957	81966.7	28612.5	27173.9	28627.4	43676.3	18428.5	38158.3	39162.4	33439.2	45132.2	164109	50778.5	54136.7	45169	48323.6	35299.5	26738.6
535	328.248	479.178	20408	17418.9	20542.3	23179.4	20628.7	19448.9	20369.5	12781	18874	32506.2	24897.2	15344.9	15950	45246.7	48844.6	36002.1	51605.1	55832.1	79808.7	70384.6	19548.4	18236.2	37878.8	31691	37057.9	17331.6	87248.1	95150.7	60822.3	30823.7	20790.7	18213.5	27687.3	9467.33	12259.7	23344.4	14940.7	14831.6	32809.4	40643.3	238969	16271.3	17247.3	17129.4	11728.3	15111	19776.8
536	328.213	564.355	12640	11267.4	12476.9	12179.3	12244.4	12129.7	12855.6	24965.6	25830.2	25896.5	24485	24131.5	24958.2	121625	27056.2	25070.2	16667.9	24901.7	26217.8	23577.2	18825.9	24440.2	24436.9	24834.4	25394.3	24069.8	21010	25452.6	23517.1	25586	23088.6	12121.1	10557.7	11901.1	11276.2	12393.3	10316.3	11756.7	12156	11482	22702.6	11830.1	11084.2	11148.6	10901.6	11915.2	11449.3
537	329.219	480.959	13684.8	13626.1	11850.2	13579	13935.8	13231	12531.4	2570.08	5181.22	7529.71	6273.03	4265.2	3279.25	10742.2	11024.1	6962.66	9906.86	13184.9	18952.5	15777.1	5466.77	4532.15	8525.89	6278.62	6573.71	3983.74	18673.9	18289.2	11732.1	5997.56	4665.89	3633.72	6143.11	2367.32	3547.67	4379.63	3532.87	3424.15	6646.37	8593.82	50165	3877.32	2737.83	4382.69	2797.2	2701.89	3624.75
538	330.337	626.857	87368	84294.5	85009.8	89393.9	85165.5	85239.8	91062.3	511979	584114	553645	430168	458365	489140	585786	577660	520695	3.11154e+06	480293	129323	157394	379016	411888	460857	450257	503577	515638	349187	446535	120687	381215	448373	126910	107179	115708	113761	104690	91022.4	165104	132832	157734	148962	101099	101827	124567	152942	141131	142743
539	331.339	625.446	30252	28994.9	31261	30222.4	30505.2	30668.6	31779.7	117270	127898	123775	97584	106542	103823	126205	129089	117687	668529	107804	27598.6	36187.6	85713.9	94938.4	103181	99643.1	111806	114039	79449.7	97384.5	28807.1	87346.9	97486.2	28093.4	25049	27230.1	27618.4	24065.1	21907.5	34600.9	27410.4	34729.5	34997.7	23108.3	23402.5	28105.9	34463.4	31393.4	33689.8
540	331.283	809.306	503.919	305.776	9471.56	11097.2	11580.2	12736.1	12251.6	31541.9	24952.3	37442.5	27461.5	26871	23852.8	56518.2	39424.7	59592.7	272955	21212.8	10140.2	2909.61	9693.03	18241.8	7134.25	24371.7	26502	23805.4	22534.3	19941.1	12167	28691.6	18557	10378.8	14562	464.84	12335.5	12598.3	14896.5	18348.8	12383.3	910.493	9733.91	13263.9	1143.24	12124.1	695.941	19746.9	16190.7
541	332.221	602.767	7739.45	7734.76	7944.51	8093.58	9173.94	8480.32	8044.16	26304.4	30127	21620.8	12870.2	39185.8	11214.5	35923.4	25299.9	46759.3	73925.1	24319.8	42994.9	57376	20568.2	28711.7	25794	24973.7	32038.7	20619.7	94371.8	10276.9	172564	22084	18027.6	6011.02	6459.77	7203.23	8925.42	5558.54	9604.56	11587.7	8006.57	10763.2	84362.2	6131.77	11045	8497.91	10419.4	10413.3	9356.08
542	333.145	389.019	27777.6	27634.2	26792.5	29796.7	28288.9	27247.6	26272.6	42842.5	94687.3	24456.1	45917.1	101973	56398.5	78142.6	135476	99613.7	127272	91259.2	186882	250914	49271.2	70377	82177.7	42197.4	105412	59691.8	253208	56905.1	120668	47803.1	67079	16235.1	27440.6	25125.7	36888.1	28623.3	39178.5	24308	29629.2	37819.4	129557	22717.6	30954.5	73598.5	34305.5	36469.5	18386.4
543	334.234	555.445	23412.7	24197.5	23223.1	22696.9	23907.8	23115.5	21986.2	3958.55	2785.01	1981.95	2717.67	2214.27	2524.56	12212.9	3141.81	2955.65	3788.59	2286.31	3483.68	3629.35	0	2123.34	2169.2	1903.9	4250.47	3580.69	3318.44	2516.6	3266.86	2778.49	2655.81	608.693	1114.18	1513.07	648.954	989.768	699.782	1040.65	696.061	799.047	2396.09	1059.21	957.851	414.14	774.961	513.038	697.34
544	334.279	508.198	21991.7	21601.1	22322.7	22220.1	22533.8	22629.8	24403.9	13504.2	12508.1	13693	12875.6	10515.1	11116.9	21517.9	14336	14881.2	90129.2	12466.9	54109.9	36589.4	9351.53	10708.2	10675.8	11487.2	14650.3	12069.2	46645.4	11028.1	20333.6	11489.4	10751.9	2632.49	2981.96	2996.48	2830.46	1899.72	2221.01	4766.59	2697.14	2184.27	35145.8	11033.9	1824.73	3379.92	2266.91	3087.32	14511.4
545	335.139	330.377	18044.4	18349.3	17833.2	16432.8	16061.4	18353.8	17659	14016.9	9741.5	17663.4	22118.6	18544.6	15707.5	29152.7	26002.3	30441.3	40854.4	22628.9	32744.1	29101.8	17625.9	18250.5	25735.6	7389.15	10987.2	17003.4	45968.6	21915.6	32144.5	12995.8	31008	7585.56	15541.3	11827	8971.16	8083.83	16846	15612.2	11993.7	8038.62	31133.6	18939.3	15176	8819.44	13232.5	11058.2	18018.8
546	336.32	755.178	19147.8	20624.8	21919.1	21148.4	21260.8	21271.5	23164.2	30672.6	51107.6	37531.1	22946.5	24784.1	83047.5	60405.5	32156.6	45461.1	169133	45775.5	21076	13450.7	8008.07	31482.6	46699.7	32592.1	106517	22166.3	33521.4	19617.6	12625.8	27905	22193.2	16574.6	16337.5	21435.7	15899.7	14324.4	10416.8	13365.7	15187.4	10952.3	13497.3	12153.4	23069.9	23470.8	26133.8	11223.5	12391.3
547	336.291	891.271	432.065	1761.77	1509.02	2044.07	2566.46	1894.89	2034.99	87074.2	164295	89916.2	184347	151448	117720	193306	237581	346803	431810	102440	30019	0	47901.3	61510.7	111373	79196.6	121355	130293	67379	146417	16342.6	129743	85815.3	1046.56	1353.78	625.23	717.531	618.747	635.797	1265.97	1072.68	821.999	42920.3	1298.18	1112.22	924.319	1470.33	794.183	1291.68
548	337.226	603.412	13706.8	14251.9	13315.9	11392.6	12996.9	7347.45	13234.4	34954.2	45794.6	29265.3	27128.6	60316.1	24754.4	48651.8	39429.7	71322.1	92354.7	47829.6	66486.6	140214	20969.4	40915.6	41097	38796.2	59588.3	36729.3	169256	19283.1	285826	32623.4	22310.1	18394.5	16477.3	16804	17058	13674.6	22907.1	13567.6	12281.3	15315.8	115157	17359.8	19563.9	7185.08	19390.2	16317.9	8084.14
549	337.294	890.968	0	363.806	225.15	371.423	372.3	832.472	718.274	23278.2	38977.2	21688.2	46424.4	34786.5	28701.3	50860.3	58686.7	78286.8	104597	23354.9	7429.79	0	11094.9	13285.5	23878.5	19221.8	28040.3	32136.7	18646.1	32173.7	3671.92	29527.8	18800.1	284.21	288.821	216.731	6957.95	134.695	222.724	7425.72	111.476	5645.87	9029.06	497.515	9855.54	11952.4	11735.2	222.554	390.901
550	338.05	40.4482	2936.79	2094.42	2969.06	2967.38	2872.19	3647.31	2507.38	18573.9	31430.2	19672.4	29595.4	31744.9	18920.8	29746.4	33437.1	51657	35538.9	30478.9	18984.1	28532.6	23654.1	34244.4	27715.9	15416.4	26926.9	27076.3	28583.8	29583	20927.9	24516.8	15374.8	6537.4	5300.34	3571.96	4909.74	3070.37	4863.37	2743.06	2811.98	3537.48	30934.6	3210.31	6529.65	8776.43	4107.95	4559.73	3977.17
551	338.342	855.582	50813.5	56411.4	72246.3	77108	75485.4	75549.2	75865	424436	449070	408032	460287	409571	400958	902796	611791	499445	281671	379469	391997	284133	149095	225676	219740	333105	360189	343239	303359	377666	319341	383485	299925	55644.4	54987.2	51892	50744.2	52034.2	48983.7	55187.5	55378.4	52752.2	360987	51363.9	58552.8	55368.3	62139.7	61308.1	61057.1
552	338.342	707.801	6039.5	4643.98	7955.73	8681.67	9469.06	9927.71	10271.2	2.97593e+06	142802	527621	487206	133303	104858	30435.6	268112	227486	291462	1.39889e+06	226532	460220	133760	131053	160913	367311	520463	4.16146e+06	223045	166281	160950	171632	79404.3	4040.5	4712.05	4592.77	5447.05	6143.05	5092.41	5302.22	4034.03	5260.24	431615	4674.87	4845.54	6011.87	5206.19	4904.66	4606.67
553	339.342	855.32	13342.4	13849.8	19927.6	20170.7	21052	19246.4	19809.1	108427	120799	102118	115403	122402	98827.9	219293	154263	139269	127249	99971	100793	72297.2	27812.2	63992.8	45894.1	85396	95428	89099.5	93112.5	95162.1	83585.7	95817.7	74769.9	14547.1	14790.4	13319.7	14090.6	13830.4	12131.5	13691.7	14259.2	13082.3	96420.6	11961.5	13823.2	13989	15460.7	15824	15775.5
554	339.201	565.324	33223.8	48344.4	43531.8	33687.1	43763.7	45245.4	35046.5	3498.46	2984.21	3049.06	3541.66	3734.02	2454.47	10247.3	2486.76	5179.35	24577.1	2993.08	3504.98	8285	881.856	4803.37	2814.94	3112.81	3798.2	2564.56	7836.17	4625	8120.73	4044.28	2868.43	621.332	896.388	997.589	570.479	1538.09	647.639	663.068	350.618	758.468	4762.38	1133.53	718.595	791.925	675.734	777.053	1059.84
555	340.259	281.321	1253.44	1002.02	1219.37	879.861	1866.16	1689.45	1213.33	26153.1	26434.6	25266.1	21898	22831.6	25225.3	46239.3	25838.2	24186.9	23831.9	25449.5	29830.4	23387.9	24688.6	24092.2	24172.9	25567.4	24791.4	25255.2	26023.9	24985.9	27512.5	23074.6	23610.5	1250.51	1897.19	2308.29	3083.36	868.798	2954.37	1423.97	1184.94	1493.7	25117.9	843.504	1648.21	2156.16	2046.21	942.5	651.19
556	342.264	510.079	54493.3	52275.4	51518.1	57550.6	53912.8	54104.1	53530.4	42299.6	52258.9	68411.8	34975.5	94126.1	93624.2	51011	62741.5	153361	159501	75701.6	120706	96750	53556.4	61324.5	40836.3	29101.4	102092	25871.3	86462.5	61791.2	106790	40056.9	37563.2	26864.8	27601.7	54589.4	44631.1	35010	35392.2	40845.2	28746	151304	107446	30487.7	20880.2	31152.6	48903.1	107454	28660
557	342.247	325.635	7562.9	7888.8	9504.11	9610.33	7414.09	10422.4	7472.28	19329.6	21233.7	9532.62	19164.7	26831.9	11350.2	27246.1	19354.8	24968.2	50344.7	15108.1	40619.5	85434.8	18764.8	17907.1	15180.6	23756.3	20024.6	19099.3	67080.1	20652	82848.4	23921.6	13125.1	12247.1	10806.1	9312.98	12291.1	6821.67	14936.2	9951.97	6848.97	9885.12	53595.5	10862.7	6173.51	11116.6	7546.24	7377.57	8723.41
558	342.88	38.1396	12063.7	10263.3	11819.7	11317.6	12643.2	12855.3	13112.6	20575	21455.6	20731.9	21526.8	22203.9	20121.4	26550.9	22642	24392	28713.2	22140.8	27133.9	27492.9	19202.5	19290.9	22482.1	18537.9	20736.3	19718.1	26477.3	19111	25556.1	21529	18527.8	12473.9	12490.3	11912.7	10409.3	11444	12134.1	11179.5	10271.2	12163.4	27771.5	11257.3	11384	14225.2	10842.7	9645.23	10090.1
559	343.249	562.346	19254	17162.2	17760.6	15708.4	17269.6	16191.2	15581.7	7537.73	6668.77	7312.82	6263.16	5938.23	5823.49	3319.21	1693.45	3146.31	6723.25	7391.58	6610.88	18892.7	372.436	2889.65	3629.45	4993.66	5224.16	4600.4	5733.59	3764.93	5702.01	5401.51	5032.81	6394.1	5432.56	5564.13	3496.65	4264.78	7143.55	3993.7	7015.66	5359.55	3808.72	4934.51	3916.35	5288.25	1839.81	5987.95	6309.19
560	343.248	505.204	16315.8	15852.1	17415.3	16612.3	18599.5	15669.9	17701.1	19256.2	21512.6	22126.2	16345.6	29718.1	29032.7	27769.8	19080.3	41190.9	40225.7	24322.9	34683.1	40523.4	17915.3	20282	17826.4	12883.6	29894.8	12320.7	30196.2	20250.4	29574.8	16310.2	16290.9	9104.48	11562.9	15550.6	12167.8	9976.1	12090	11492.1	9332.45	32921.7	27801	9423.74	9971.08	13508.8	17678.2	26868.6	11035.8
561	344.226	268.799	5435.81	6170.27	7411.15	6667.46	6472.75	5960.43	6453.67	8615.58	13710.3	7522.58	7168.5	7738.09	8961.62	15296.5	9487.12	8956.6	10700.1	8252.59	10249.1	13980.6	7395.32	20718.4	10742.5	10319	6707.37	6329.73	20259.1	7007.14	16831.8	6617.3	5705.81	5629.65	11598.6	6798.96	4843.24	3461.46	5541.01	7286.09	3551.06	3283.63	11444.9	7817.86	6365.96	11038.1	10762	4415.28	7367.43
562	344.278	538.383	55449.5	52436.9	51183.1	53906.6	52947.7	53240.5	54629.9	63167.4	65385.3	79243.6	46854.9	168994	102564	65934.4	105946	238927	415433	98164.8	106152	118636	66590.1	68438	52831.9	33907	116384	37336.1	105141	87637.4	76358.4	58196.2	44904	18801.7	33823.3	61416.9	37790.6	30294.4	34134.5	41144.1	33829.7	161970	105158	26689.2	23041.5	33410.6	44954.8	122274	32612.9
563	345.272	541.242	12066.1	13559.4	12102.6	15963.7	15275.3	15148.7	12604.6	13528.9	13819	16691.3	9996.58	39041.1	23098.1	14406	23017.5	52301.1	88242.8	21595.7	22291	25760.6	14012.4	14379	11488.2	8454.78	26799.7	8466.41	23532.9	18131.2	18712.3	12377	9513.2	3802.5	6298.24	12892.3	7120.78	7012.51	7151.41	7710.57	7740.5	35081.3	22556.5	5681.03	3245.95	7047.68	8984.7	26044.2	7516.34
564	346.331	569.624	6123.97	7125.42	6840.32	6183.66	6881.56	5937.3	7191.79	102861	87994.6	96716.2	85802.4	82267.4	71038.9	104131	88973	86497.6	627597	77101.9	26885.9	32509.8	72061.6	73674.6	83062.2	85446.2	82259.1	70224.4	73934.3	63987	22618.1	63505.7	64878.6	11866.1	7964.03	9778.77	12397	6918.27	8268.3	12911.5	12208.6	9533.37	27098	6895.65	7226.7	34631.5	7441.04	8947.26	13283
565	346.274	777.963	10373.1	12249.9	14924.3	16329.3	16221.9	16763.8	16545.6	152.707	19274.5	0	0	21936	20563.9	48435.9	37292.3	68028.6	70637.7	24491.5	16198.4	16368.6	0	25810.3	0	0	19277.7	15267.1	18068.7	34091.9	16326.6	0	0	11111.1	13415.9	9066.01	10891.7	9705.92	7456.37	14059.6	10877.3	25556.1	35266.3	9042.65	11548.9	17648.4	14715.6	9133.03	11975.8
566	347.174	437.082	20598.6	21069	20624.1	20113.7	20307.6	20355.7	22366.2	18351.7	35549.5	13090.8	21756.4	38309.2	19869	33174.8	47958.1	34231.2	34027	37465.1	26935.4	37812.4	20116	26585.8	33812.1	17932.3	35210	21039	43905.9	20781.7	24147.9	28635.5	29958.8	19541	71451.9	74894.7	40248.9	29820.8	49592.2	33351	49155.8	59671.8	23375.6	61166.1	72945.8	63404	145500	43244.6	33327.5
567	347.327	570.296	687.107	1529.49	1923.82	1209.77	1595.89	1460.52	1348.15	25781.9	20708	22318.4	18810	18585.2	16294.7	24145.1	18843.4	20982.4	131937	19112.5	9325.55	8068.25	14510.7	16894.2	19613.4	20302.3	19331.5	16802.4	20905	14178.2	7877.72	17057.9	14471.2	1142.71	996.096	863.485	1468.81	696.443	992.059	972.475	1764.48	2402.22	8142.61	1155.01	720.967	1101.52	1745.6	1052.14	1059.43
568	348.08	38.342	11248	13225	12033.4	12978.9	13106.8	12334.1	12487.7	66018.7	89876.1	65048.4	91951.2	98424.5	68577	99719.8	99555.3	147747	117684	91061.9	84181	89068.4	75887.3	92770.8	85918.5	52791.1	83953.5	81674	92796.9	85626.7	71381.1	68891.5	62018.4	20129.3	20280.1	14556.2	19328	13492.1	18465.5	13822.8	13288.8	15431.5	89083.1	13947.4	21106.1	37567.4	16294.5	15335.5	16588.6
569	349.237	792.578	27000.4	30268.4	35932.8	35647.2	36093.7	39015.9	37550.7	107878	176532	54037.2	148523	343345	125070	225503	200537	317814	794204	101398	85954.4	106154	87294.3	220491	66941.5	95339.5	272226	103160	297244	90508	122094	125575	83067	34294.4	33241.3	32470.8	69402.1	29540.4	58421.4	54837.3	40511.3	59591.2	166491	55221.8	59060.2	58903.5	68106.8	49359.9	25014.3
570	350.312	788.625	28443.4	27750	29196.8	29685.1	28416.2	29610.7	30836.3	64435.4	77644.8	48950	66553.2	104311	62089.7	108626	81060.3	98639.8	214052	56287.7	51934.2	49904.5	38316.1	78893	17155.3	57922.9	89410.9	56681.7	97842	56274.3	58043.4	59698.6	51799	28321.7	38310.4	56445.4	31848.1	26034	28285.7	28909.3	26418.6	30929	68701.2	29244	40878.2	31534.5	66154.2	28653.6	28281.3
571	352.165	342.684	22698.4	24211.3	27768.9	25013.7	25882.6	28111	26310.3	30091.3	13320.8	37926.5	30945.5	50672.4	32753.6	45089	49662.7	65985	121178	64261.2	78177.8	122516	32929.4	48014.5	63174.6	22513.7	23383.8	30164.4	97372.4	38679.8	129419	15942.1	29080.4	25917.7	37448.7	24080.8	30676.8	19998.1	24726.1	28730.9	17983.4	26504.5	117043	29831.1	24815.5	30810.8	38502.8	22193.4	24473.3
572	352.32	778.406	14056.7	15815.5	18662.5	18949	19294.4	19931.1	19131.5	32696.1	59090.7	38104.4	23055.6	19104.5	163901	65944.6	25139.8	51052.9	181527	55739.2	14603.6	11462.4	4897.16	20372	6140.92	34326.2	130230	21662.1	22304.5	14569.1	6255.4	26203.1	19740.1	13210.4	17490.6	22515.4	15417.3	16295.8	5996.88	14781.7	16580.8	4311.11	6855.14	14442.3	26188.1	25684.7	27458.5	7628.17	6402.24
573	352.898	38.1199	33167.7	34290.9	34063.7	34440.8	36320.9	35236.2	34392.7	47015.8	46328.6	46508.3	48265.4	49030.7	43486.5	54433.8	49830.9	51174.5	39473	45236.3	37374.4	35944.2	43040.9	44834.1	46882.5	43653.1	45934.9	45658.9	34643.8	44919.3	36818.9	45614.1	42085.6	32478.5	33774.7	32555.7	33319.8	34269.8	33499.8	33488	31579.3	34807.4	36237.8	33198.4	31684.5	35306.3	30543.7	32209	30990.4
574	353.169	342.545	7030.91	9984.31	10992.8	10896.3	11793.8	13521.7	14215.9	8675.83	3961.69	8855.39	7591.41	14010.5	8112.75	14245.6	12462.7	15876.5	28539.6	15748.1	19256.2	28899.3	8977.89	11127.4	15459.2	4901.74	6411.18	7649.96	25033.1	9899.45	32323.8	4224.54	6622.45	5572.58	9724.02	6479.55	6822.97	5296.84	6731.33	8278.17	4919.53	6794.4	30329.4	6506.02	5226.69	7405.15	10254	5927.99	6107.68
575	353.194	528.526	7863.15	7522.68	8748.05	8488.36	8622.55	7927.43	8728.58	1830.07	2720.12	1742.66	2216.92	97458.6	1457.33	3777.27	3505.88	2173.05	2756.42	2556.63	4992.64	4655.41	725.619	910.516	2407.04	1785.1	2367.58	1773.03	5376.45	1182.61	7479.13	1283.76	1004.69	856.658	1834.83	1041.32	1598.93	503.092	2543.46	838.837	358.227	1139.79	6242.5	916.961	2220.38	892.483	2205.26	1101.51	1074.93
576	353.267	810.734	11959.8	165.892	8582.84	13296.9	12624.8	15710.9	17535	31727.5	34340.6	54374.4	32512.5	55229.9	42628.5	506976	476811	598953	1.94583e+06	30307.6	11277.9	619.291	4718.6	18173.4	0	15833.5	36525.9	27000.9	25133	16353.9	15068.3	34420.9	17312	6946.88	9982.32	587.533	9275.23	230.85	9701.19	14476.6	1089.63	9670.23	10011.9	7637.84	1832.16	10501.4	9788.46	17667.3	10688.3
577	354.318	801.214	8285.18	6912.53	9076.84	10581.8	11070.4	11253.4	11607.4	17138.5	22858.2	12898.6	15994.3	18827.7	29560.3	121961	104847	130185	410179	7554.4	3681.48	955.898	0	12598.9	0	15931.9	73859.5	15070.1	6629.15	11546.4	3622.93	22679.9	12619.3	28565.8	15405	26738.4	9869.01	10123.1	19948.1	14079.3	11175.1	6872.9	1982.97	18962.2	31105.2	22054.6	34261.7	11257.8	16231.6
578	355.209	500.457	14802.1	17040.2	16476.3	16015.3	17119.3	15184.8	17328.1	8360.43	2063.26	1254.22	2335.94	2661.15	949.107	2484.83	1611.42	3122.53	4155.91	1851.45	5446	112445	1691.28	2088.56	1002.77	777.735	1502.27	1766.12	53419.1	2414.47	35795.4	2409.02	439.72	887.194	481.17	554.208	10920.2	547.307	14220.4	989.259	395.841	14268.9	24957.9	477.665	547.954	1216.75	348.683	1162.4	525.989
579	355.284	773.384	22339	23882.2	26941	29858.9	29817.4	30702.5	32679.4	10657.2	39242.3	41435.4	44193	31526	19416.2	87596	44944.2	61845.1	164190	38761.3	7018.54	6621.52	8500.15	24025.1	6412.81	23009.9	36681.3	35779.9	19687.3	28124.8	15878	48513	18124.5	16192.4	29400.3	19450.4	13255.1	17546.7	23407.1	18358	12603.1	7383.29	4673.92	14917	27740.1	14599.4	26557.1	20886.8	10431.2
580	356.262	351.342	7454.59	8557.7	7855.93	8681.23	7476.67	7626.14	8372.81	17911.8	24142.4	11546	19883.9	25747.8	13067	25122.2	19036.3	24221.9	48676.2	18915.1	39770.6	76921.8	18088.1	18513.6	15675.7	25130.2	18626.7	16691.8	66612.8	19240.1	75467.6	22220.1	12368.7	10745.9	11252	9257.9	11151.9	7779.61	12543.4	10010.5	7363.48	9868.35	54996.2	10788.3	6294.24	9263.22	8774.2	10286.9	7453.65
581	356.279	537.161	13991.8	12927.6	13234.7	13458.5	12554.7	13479	13754.8	11230.3	13233.2	14972.3	18665.7	11018.4	12869.1	19062.2	26216.1	33066.7	58982.7	55131.5	44067	82374.9	11115.6	18185	31459.2	17838.9	27663.5	15188	130511	70768.6	27506	15733	12377.7	10424.1	21950.1	7965.41	10615.7	16190.8	13578.7	8243.55	31462.5	34171.8	118259	9822.41	13617.6	16970.3	10384.4	14966.3	13847.2
582	356.352	649.097	12597.9	11964.2	13521.6	13866.1	13015.3	13362.1	12867.1	71972.2	125131	98209.5	67414.1	81322.7	88221.9	80842.6	93405.6	80037.8	420154	71184.2	27996.5	37834.4	63802.7	57758.4	72533.6	68404.7	70646	87524.8	53367.2	61739.6	25025.8	59344.8	62383.7	28314	17489.4	487.011	8406.99	11063.6	14903.8	41787.6	25132.1	44354.1	34096.8	16971.8	17807.7	25037.8	23873.8	33351.9	32457.4
583	357.234	527.164	16522.8	17009.2	15410.5	18230.9	16773.6	17087.9	16366.2	6705.44	4114.87	14704.5	9116.7	6921.42	3896.62	12784.2	21915.6	9792.77	184633	23403	36415.8	78788.9	19774	10693.5	8695.85	7050.65	10875.9	7459.38	37707	19408	19347.1	22212	4308.87	5868.49	22736.7	7844.02	3392.29	3983.97	21601	41904.1	8265.85	8479.56	41083.9	9376.21	3867.1	8553.53	10511.6	22156	6472.5
584	357.279	603.592	29092.1	30022.7	28921.5	30519.3	29567.8	29759.8	30647.4	50243	5779.31	19005.9	31239.8	14151.1	7592.26	48200.8	76202.8	22179	266639	27741	60855.8	392818	14326.5	21207.5	19962.1	16537.7	20670.2	37536.3	117155	29562	18501.5	45707.9	5445.45	16405.5	11525.2	14929.6	20893.2	7916.88	25741.8	20100.2	17975.1	19676.2	56274.4	45081.8	4353.4	15766.8	13606.2	29991.3	16831.6
585	358.294	549.226	22452.2	21869.1	21486.7	21769.8	21310.1	20639.6	20413	12366.8	26529	16034.7	34806.2	13192.2	15292.4	25834.8	58696.9	59424.5	111337	126868	91208.4	38828.6	16178.3	50790.9	34708.3	25092.3	78597.9	37616.9	255853	517948	32429.6	59565	23898.6	21501.9	35648	9414.59	18758.2	21326.1	18515.7	26494.7	54392	62135.8	340044	11192.9	29897.2	27154.2	12681.1	12012.4	17635.3
586	358.368	688.449	2707.64	2661.8	4389.33	3138.09	3446.01	4254.6	3317.87	306278	326485	288991	261426	266259	249003	261443	304790	321130	1.62213e+06	242691	96193.2	89043.9	174850	220983	248010	247112	250389	295117	178644	259992	82995.8	227446	230243	3403.31	3259.16	3013.25	4763.91	4324.93	3140.35	3525.61	3531.06	4069.68	103647	2765.84	3012.75	4271.64	4607.28	3697.33	3344.6
587	359.371	688.349	843.836	445.159	1140.27	813.624	553.309	411.077	922.884	75001.7	79291	72704.2	62609	66625.5	62443.5	63001.1	72717.1	75761	378325	59930.3	24994.9	22358.6	36323.3	56676.5	58265.3	60393.2	58671.4	70603.4	42650	61801.9	22977.2	55023.6	55737.8	504.714	1089.19	533.195	1307.78	771.169	1326.95	607.091	844.746	958.22	26376.5	830.831	618.187	1146.62	1584.63	727.223	280.886
588	360.291	869.448	15649.7	16234.5	21489.6	22430.2	23819.2	23962.3	24686	99996.9	188615	89390.1	188832	142286	130529	261906	274996	382260	444755	200009	41031.9	39854	90103	57319.8	133047	105944	158590	145081	79066.2	183126	24277.7	113584	95797.5	35663.1	37978.3	18721.6	30911.1	25317.5	23135.4	24232.8	32598.7	31123.2	45788.2	22547.7	45778	57464.6	33403.8	20880.5	30611
589	360.361	687.359	6193.59	6312.64	5691.9	7583.18	6633.46	6589.61	7426.48	580209	11807.3	80880.9	28194.5	9861.62	8012.93	11032.6	16375.5	14178.1	67871	172570	19233.8	31316.9	0	7165.73	9222.23	13731.3	29053.1	806953	10000.9	7629.87	4913.54	7966.97	4884.78	38609.2	21473.8	16903.8	32320.1	24539	44015.3	21149.9	17435.1	17771.9	50357.6	22111.1	28020.4	21701.7	15128.6	26687.4	15030
590	361.254	561.423	14771.7	8836.16	11124.9	10639.5	11855.8	12355	11543.5	7891.41	2146.28	36610.7	3031.43	1165.56	1217.94	25524.8	21188.8	2910.23	8987.91	7168.29	7046.77	42257.9	0	2842.97	3467.34	1089.92	10590.9	3834.59	8335.93	5638.31	4768.19	8994.11	2842.25	1121.49	3336.88	949.387	789.282	989.405	1452.95	6123.52	1717.5	748.685	4017.66	1686.1	1497.63	3981.42	1182.37	989.378	1132.22
591	361.262	606.844	16824.2	13569.4	11340	11089.8	9064.65	8969.68	8758.65	23149.3	37834.6	22501.3	31653.7	39964.7	23781.9	39990.2	21461.5	48535.6	42520.8	28887.4	25304.7	25355.2	19830.2	21723.9	22256.1	19846.1	25246.5	36305.9	39367.8	27542.8	56851.4	31139.5	26135.8	8175.91	7975.99	7676.38	11701.9	9462.5	13182.2	13157.4	10353.6	12677.6	34551.9	12130.8	8634.95	6348.2	9674.45	11732.1	8080.78
592	361.294	869.966	366.22	678.314	804.128	736.675	547.467	7824.13	7706.62	23860.9	48357.3	22741	48594.3	39713.5	32800.1	66971.2	69839.5	92802.5	112247	50307.6	10656.3	10291.9	22220.1	12425.6	33410.3	26042.6	40662.6	34524.7	19493.4	45963.6	6524.79	28500.4	22470.5	9356.5	10432.2	393.329	7827.51	7120.13	0	216.66	8794.46	7999.99	11893	0	11466.1	14672.1	9311.09	234.139	7404.17
593	362.106	280.469	0	213.069	0	0	150.319	102.727	239.587	7738.11	12129.1	8283.1	10726.8	11938.1	8886.26	12680	13797.6	18224.2	16677.1	12615.1	18089.4	18657.3	9943.34	12115	8285.98	8518.16	12116.6	9662.53	19470	10302.2	17348.1	10542.6	10862.8	114.03	0	630.638	438.87	212.866	513.985	98.4037	113.57	240.255	17739.4	235.148	101.07	0	0	339.763	0
594	362.326	513.33	8495.16	7580.69	7606.22	7511.85	7524.57	8182.03	8188.71	53038.2	47165.6	53550.8	48373.2	49470.2	44876.6	60532.7	51483.8	50178.8	377815	44269.4	24442.3	28484.7	42206.3	43879.9	48970	48620.1	46257.7	42800.7	59423.6	39799.6	19963.7	38615.7	39215.2	7832.32	7066.52	6807.23	8756.79	6394.22	10222	9357.64	14595.6	6997.65	22648.5	7384.21	8660.47	25595.3	10543.6	7697.96	9286.19
595	362.272	561.261	28905.2	28605.5	24622.1	25227.6	28883.4	25475.2	24418.8	7030.68	4519.29	9752.26	4552.12	3800.92	4033.61	11325.2	9457.66	5686.9	42472	7178.86	7985.81	16035.2	1763.03	3925.78	5991.17	5416.27	7254.08	4405.22	12224.3	5158.07	3063.72	6266.85	4005.36	917.929	1346.35	958.085	1565.82	1061.26	830.435	1952.83	1073.4	854.586	6021.64	790.558	819.095	1568.13	981.881	1258.31	1260.78
596	362.927	36.9688	177650	176674	168481	182800	184667	180569	186391	217660	206912	217371	207456	203545	202770	228940	217103	209129	146240	205230	159484	152078	200729	197992	197526	212127	198698	213746	149283	207413	157679	209219	204141	180230	174309	171535	178215	185752	183594	179135	182783	179386	153019	176947	164503	172956	181280	187280	186885
597	363.216	416.59	10975.8	13308.2	12447.7	12775.6	12728.9	13190.4	11523.8	20227.9	11513	11149.7	16521.5	15715.7	30326.6	22066.5	44053.6	41143.3	39026.3	30658.2	54657.4	54099.7	29170.1	15115.8	13173.8	6216.49	24212.4	13951.4	26732.1	17023.2	49213.2	9252.28	5999.85	7418.52	14029.7	17684.1	11250.9	12264.3	8818.77	12235.5	7995.44	16965.4	61672.6	5897.74	14623.4	11537.3	26689	17839	10780
598	364.321	730.721	8735.09	10786.4	12326.7	11455.6	12180.2	13392.3	12072.2	44617	21974.4	36270.9	19763.4	36084	49208.3	2061.51	19376.3	36760.3	47842.8	90756.7	12008.7	15617.8	0	15393.8	17348.5	24055.7	13568.6	15767.7	18899.5	5202.25	17661.7	773.895	0	10309.6	8268.7	9368.9	8290.16	8822.08	4289.28	3915.33	4464.3	4393.57	17976.1	3100.52	11051	8933.86	12854.7	7884.91	4551.95
599	364.34	827.045	16217.8	20822.7	23203.9	24507	23896.4	25817.2	25728.1	46761.8	62538	42832.2	40761.3	44745.9	40854	66170.2	46060.5	48017.4	79347.4	38473.3	34846.8	14735.5	21321.5	40509.5	33640	46603.8	36618.2	34066	47012.6	36634.4	31618.6	34478.1	30884.1	20686.9	18523.6	21476.8	18536.7	19542.7	16522.4	16529.1	16552.1	15212.4	30574.4	16957.1	24712.1	21696.3	23918.3	17029.3	19436.4
600	367.21	553.06	6888.84	6255.96	6060.92	6804.15	6344.87	7166.88	6193.41	1519.57	1156.44	387.862	13104	1809.02	1400.97	12683.9	1335.19	8245.65	98006.2	3054.81	10494.4	11893.5	0	1534.31	813.131	1192.86	1091.77	1218.04	33758.9	1072.05	4841.72	1931.72	506.19	491.613	581.121	127.624	103.36	379.609	13128.8	267.923	216.358	0	16006.3	17554.4	383.574	332.729	205.67	98.3259	10962.5
601	368.279	537.737	67692.8	65663.9	66296.3	64043	66292.5	67294.5	63839.4	41008.3	57432.4	75777	43340.2	119817	112821	60834.9	87872.4	156779	274200	95839.7	133351	116976	58327.9	68662.2	41881.3	26480.3	144026	36706.7	94768	75531.1	96570.8	53775.7	57088.6	31282.6	44714.9	65477.5	37049.6	29905.9	43089.7	33835.7	28282.2	168312	74760.5	32340	33531.8	34606.7	48262.5	134592	23564.8
602	369.174	461.337	28565	29359.3	31820.9	31812.5	31039.3	30057.3	28645.5	12164.2	20299.6	8956.16	13826.8	22695.4	14589.4	22374.7	27074.4	19895	24270.4	20317.1	20050.8	27633.6	10367.2	6155.71	18173.3	10970.9	6741.15	11241.2	33199.2	12602.6	20541.7	10571.7	18608.8	269.115	755.452	955.747	1438.69	1243.5	1519.75	606.532	1242.38	963.858	18320.5	872.963	1201.41	1918.17	926.106	1589.05	758.786
603	369.266	534.442	18096.2	18555.9	20541.5	18383.4	17964.2	17408.1	19023.4	22182.7	22999.4	27516.3	21284.8	42028.1	41286.2	20674.9	22615.5	38353.3	74041.9	30025.3	46648.4	36043.7	28938.4	28358.7	19209.2	16973.6	45374	8330.85	35259.1	27330.2	37540.8	20471	18239.7	13399	15774.8	20166.7	12296.7	10916.4	16277.5	12021.6	12104.1	43149.3	38246.3	11747	13570.8	12544	17155.6	34936.7	10628.1
604	370.298	567.083	73416.9	73715.9	70513.9	70486.1	70614.8	69507.2	70200.7	51624.2	74161.1	85120.3	43354.5	155113	125126	81913	112532	228504	419933	95113.5	112905	114937	85679.4	83239.8	54365.3	45904.2	136453	35496.5	77427.6	87605.8	88583	60034.5	73147.9	34127.5	41161.8	63956.1	51023.7	36638	45083.2	49532.4	31907.7	200043	72910.4	36141.6	33133.7	48837.8	69724.4	145776	29914.4
605	371.104	842.795	15624.3	32140.8	40710.8	53778.4	54686.6	64863.1	58255.3	136874	144718	79234.9	126310	195898	115975	222178	91525.7	154142	218535	84344.3	34667.8	30339.2	53099.3	433076	167481	71616	61576	45352	97714.8	39659.1	19779.2	72291	32313.8	12912.2	11287.6	14555.7	14923.4	14469	9205.8	10392.5	7547.64	10443.4	37528.4	17116.5	13556	18669.8	8976.63	15608.2	14153.4
606	371.227	781.45	37479.1	38409.7	42736	45073.3	44416.6	43448.8	44900.3	129721	150468	50254.6	111485	239579	129051	183671	187449	425136	1.53737e+06	163505	50677.3	62687.1	59589.2	180392	26485	83777.7	167032	71023.2	146164	61057.5	65469.3	85573	56177.2	36306.2	42427.5	38044.1	69927.2	37565.1	62420.1	70006.5	55169	65545.5	106949	74093.6	57931.6	45352.2	76755.8	55920.3	28914.3
607	371.277	556.774	26266.6	27448.7	26641.3	27477.1	26876.7	26212.4	26494.6	13733.3	19225.1	20539.6	11953.8	37103	32716.8	27141.7	28592.7	51224.8	92751.3	23105.8	27700.1	28255.1	20347.5	18147.7	13869.7	15549.9	32478.7	9250.92	20536.2	21889.4	22468.8	15763.7	16976.3	9847.59	12608.7	17648.9	13416.1	10097.3	11594.7	13031.3	8307.49	47464.8	20572.2	11130.9	9967.06	15164.4	20839.6	36961.6	9105.49
608	372.104	843.607	201.547	11246	15102	18128.9	19888.8	20995.6	20981.9	46284.7	47621	28233.6	40217.3	68751.8	39592.7	77352.6	33241.4	53012	67640.4	28689.8	12229.8	8612.05	17822.5	144638	58665	22655.2	19969.4	14407.8	31302.7	10258.4	8604.22	21353.5	10578.2	502.556	236.387	234.097	123.701	0	0	341.151	115.228	114.613	12672.4	101.855	97.8448	109.761	0	123.45	115.703
609	372.303	775.319	19417.9	16668.1	20955	22219.5	23686.7	22805.1	22297.7	29838.9	51579.1	34567.6	43640.9	70235.7	34414.9	77080	67218	145045	454762	25263	9603.3	10382.2	13432.9	49307.4	1579.87	22256.1	55905.8	33617.3	40958.6	24226.3	13739.3	42403	16798.8	10899.4	21158.5	11986.8	16929.7	14046	20689	20038.3	13744.3	18191.3	21195.6	20309.6	22271	15669	23293.4	17941.9	4210.87
610	372.31	596.084	13553	13858.1	14202.7	13627.3	13746.7	13143.9	13294.9	17622	18802.6	21482.5	15910.2	66071.3	27456.9	20969.3	27491.9	51766.7	147192	29341.6	16464.6	29260.3	13822.6	19870.5	24455	15889.8	28845.7	13193.2	27664	29849.6	14569.7	18545.2	17476.8	6559.64	11444.8	15517.5	12762.8	10682.1	9116.27	12049.4	14687.9	32507.1	21039.9	8136.27	6955.68	9793.41	15771.8	21898.8	12100.7
611	373.259	776.191	72959.9	70494.6	78622.7	76883.6	72738.9	73704.9	71087.8	271154	343008	58529.8	349372	602401	422209	243711	300848	493102	3.6669e+06	166473	204070	384916	186533	406306	142424	181587	417292	166204	584651	198368	184654	245557	165590	71395.4	88178.7	73817.6	178546	66175.6	121753	116666	107254	116419	396047	152708	131926	122072	137954	94957.8	51824.2
612	374.287	777.796	16762.1	17927.9	17851.5	17490.6	17789.6	18096.5	16920.7	56885.2	79493.1	18011.7	74265	128750	113826	76066.3	72244.8	117522	784873	44877.8	42519.2	82048.1	39473.4	89336	28791.8	38851.8	106810	35017.3	126750	41991.8	39715.3	51519.3	35859.6	16323.7	21671.4	17454.8	39357.2	15436.4	25928.1	26187.8	24693.6	27697.7	83966	33660	30364.4	27659.8	31144.3	22473.3	11482.2
613	374.363	627.403	715.275	1101.36	754.096	693.629	594.716	841.498	748.927	102202	135640	114586	72648.6	76230.1	74111.9	96918.5	87877.7	85618.5	490295	78861.3	23190.5	28090.8	68035	76511.3	81478.7	80022.4	83593.9	82077.5	86226.4	74694	20466.7	65103.5	73676.3	825.042	460.195	131.801	427.074	271.875	487.74	610.124	846.244	519.254	25109.9	127.198	316.012	4309.5	595.752	285.949	272.411
614	375.202	483.411	21236.5	22462.4	23573.9	23526.3	22845.7	23311	22841.6	506.89	921.453	223.884	449.685	613.653	451.575	4143.73	698.567	778.633	27978.3	727.67	3490.09	14042.5	572.516	356.089	249.128	328.397	331.235	769.307	5086.71	128.601	2968.77	805.888	556.557	239.123	232.698	0	99.257	269.408	0	133.026	217.798	0	3372.96	105.942	104.044	0	121.354	225.916	98.4027
615	375.321	721.82	17942.1	19414.3	25502.1	28979.1	27655.8	28783.1	27692.2	565.494	10459.9	2169.96	2100.53	2827.89	568.61	40798	17444.3	19004.2	50488.6	580.148	1179.52	666.944	0	726.214	504.527	491.172	550.011	856.082	2727.15	261.131	1824.82	2328.12	0	62483.5	91560.6	104152	81975.8	40329.9	52698.8	106843	31408.4	48539.7	712.818	34962.7	184505	40855.2	114480	47435.3	30904.5
616	375.366	627.34	0	0	0	0	119.645	0	0	25039.5	32326.6	27872.4	18633.5	16951.8	18950.6	25192.8	21882.1	18504.5	118501	20272.4	5290.88	19185.3	13433.9	14579.4	16385.2	21375.2	20432.7	21236.2	25728.6	15467.3	4006.34	15944.5	15915.4	113.883	0	13169.8	0	0	0	23470.1	123.607	0	6178.89	115.519	0	275684	15627.9	0	0
617	376.26	566.312	76312.1	76462.3	78430.7	78527.8	78276.7	74946.4	78552	2402.04	2717.04	1958.28	2495.54	2125.8	2142.73	5985.87	3754.29	3283.57	6351.25	2149.1	12005.5	11411.1	0	2041.08	1727.52	1763.75	2228.97	2060.64	11346	2157.26	12200.9	2255.24	1783.17	94794.7	88825.1	128261	106859	114993	104754	107859	104519	108991	12007.7	98278.3	139648	112478	113690	107594	126387
618	376.929	41.2656	22974.8	23631.1	22697	23303.2	24557.4	23638.2	24249.2	24226	25511.2	22180.7	26469.7	26879.8	23355.9	32196.5	28488.3	30781.4	46464.3	24013.8	48160.5	40881.3	25583	20476.5	23261.8	22735.3	23504.7	21350.6	37405.7	24082	47454.3	25370.7	26286.1	21715.2	20361.7	19443.7	21349.5	22120.6	20417	20888.6	17992.1	19485.3	42935.8	19153.7	22078.3	24598.4	23282.7	22069.9	21516.7
619	377.29	774.646	22483.7	23979.5	27571.7	30693.7	31251.5	33019.4	35967.4	28159.5	57457.1	46652.8	54108.1	36782	39734.5	299686	126338	195837	622388	26717.4	24877.8	22140.5	4359.52	31095.6	0	29592.5	39844.2	43677	34264.6	26096	27426.9	49722.6	26957.9	16105.9	27377.9	30766.9	15511.8	18925.6	21255.5	15435.2	15123	15318.1	21646.3	15474.6	29426.7	15161.7	36116.9	23206.4	15709.5
620	378.345	770.86	18840.2	19895.3	22070.1	23959.9	24387.3	25184.9	25370.5	810.168	17847.1	6617.93	7505.89	4890.12	502.087	75080.1	32834.7	50710.5	173432	5109.65	797.14	584.841	0	14058.3	0	3093.4	8226.79	7506.58	2557.3	5628.31	255.359	8237.04	2072.98	24445.3	27133.7	41116	20675	21382	20723.8	21644.7	20499.1	20467.7	271.573	21081.6	32183.6	21790.4	44219.8	21368.4	23136.7
621	378.914	39.4989	40525.4	42138.1	41370.4	43082.9	42629.3	43684.2	40739.2	40703.6	42654.6	39062.8	41001.5	43206.5	43300	49580.9	44562.6	45720.1	55316.4	43664.2	58461.9	48819.2	39312.6	37424.2	36451.8	42427.1	41333.1	37930.5	49184.6	38866.9	59121.4	40634.2	45775.8	36855.9	40117.2	38473.5	38619.8	37927.5	37624.9	40337.3	39861.3	35228	52784.5	35388.2	41979.5	38144.5	40518.4	38253.9	41377.4
622	379.283	818.533	44802.6	1992.25	9604.43	13432.8	14444.4	18352.3	19252.6	4607.67	19264.4	18183	16812.7	15721.4	4200.29	176329	76111.1	189601	215090	10007	3815.86	0	1668.04	5307.5	0	5537.57	8699.89	9483.88	4995.48	4369	4550.81	21821.1	3458.7	1789.18	9960.67	1533.6	1260.03	975.343	10195	9436.95	1515.09	577.171	2124.25	1434.95	9572.12	2330.78	4821.38	9157.19	2026.8
623	380.256	573.928	17744.3	17543.5	16665	15613.2	17028.7	15906.9	17548.1	60276.5	65290.4	57066.5	59134.7	67837.2	53384.2	47163.7	59124.1	79020.3	360505	86625.8	46115.2	45184.7	44845.9	61716.5	65842.5	56356.9	75797.9	64101	71482.3	63814.2	38132.4	59690.3	43947.6	23367.9	25734.4	28561.3	29435.7	26477.8	30337.6	32272.5	33443	29805	49451	31869.5	29689.6	28240.9	32583.9	31452.7	29624.6
624	380.335	745.613	22087.6	25049.6	27270.3	28118.8	27048.6	27849.5	26338.4	28742.8	54735.2	26742.3	24316.6	30332.6	25646.8	46488.7	30775.2	35820.8	54314.1	19051.1	21388.2	16248.2	10343.1	29818.1	53018.8	33533.2	19917.4	20269.1	40539.7	19259.7	20851.2	21771	16480.6	20761.5	19003.7	21223.5	17973.6	19599.4	18570.8	17664.5	16546.4	18217.7	19173.8	18407.5	25860.9	20755.4	25702.9	18085.9	19796.2
625	380.907	40.4024	10162.2	9152.57	10014.6	10322.7	11045.5	9701.9	11070.6	11009.1	12500	12988.6	12052.1	12315.3	11248.8	15805.2	12588	13645.5	25464.7	10598.1	25719.2	30458.5	10007.5	10590.7	10317.9	10316.4	12671.1	11267.6	20932.2	11687.5	31411.5	12331.5	11997.1	9093.12	7970	9127.24	8741.61	9635.86	8611.93	9049.09	8466.04	8496.12	25225.1	7959.67	10193.4	10310.1	8462.79	8274.38	9861.05
626	383.116	41.3571	163458	167257	170540	177109	170853	172433	171574	145515	173534	135479	172996	168714	154490	240032	210875	217091	296152	182834	319006	288632	177574	142079	149398	170985	175858	150383	234487	154023	347075	175151	230615	145990	139410	120324	145984	143122	126746	137844	123763	110782	299923	126357	152031	152531	143049	158567	160349
627	383.178	460.845	48723.4	46670.2	45136.3	47044.9	46137	47207.4	47711.6	537.576	510.371	259.693	1283.42	224.079	122.052	1615.77	975.553	384.373	679.822	554.475	1457.39	1076.22	583.228	260.237	322.392	398.652	305.886	417.807	2176.96	340.434	1290.51	361.196	362.64	398.34	500.315	227.955	595.832	709.835	387.005	483.155	206.772	517.202	2211.1	490.314	566.513	501.786	733.195	488.464	267.627
628	383.241	563.677	28065.9	27024.7	27529.3	27066.5	26156.2	27971.6	27881.6	9820.87	12133.9	3070.26	9532.95	13961.3	9207.26	9958.18	9987.67	13678.6	26703.7	9630.62	20607.7	25517.5	0	9927.28	9768.06	8638.1	8603.56	11142.7	19320.6	7623.47	20218.7	11137.9	8847.37	977.659	377.148	468.298	353.537	923.04	538.828	351.633	597.167	721.681	17676.8	762.675	235.373	896.232	1245.28	885.672	555.846
629	384.119	41.3963	23649.9	22747.8	23892.2	22814.6	24817.1	25433.5	24211.2	22418	24337.8	19964.8	22961.9	23929	21053.9	34717.3	31175	35453.8	43202.4	25475.6	41915.7	39102.6	24222.8	21127.9	21024.4	25913.5	26424.2	19447.7	30252.3	22245.2	47384.7	24640.6	31790.8	19580.3	18480.6	18254.6	19446.4	19771.6	19924.3	18753	17069	14882.7	38418.8	18360.4	20664.4	21198.3	19247.3	19594.2	22323.6
630	384.348	855.541	63430.5	70111.9	88250.1	96569.2	93175.5	97132.7	94397.2	498847	526298	492530	544079	478032	466834	1.09477e+06	746488	608314	339685	445426	463096	338791	172324	274744	253753	390206	415437	401522	352670	452762	372237	458471	345455	65534.8	64814.9	60777.9	62623	63574.5	57131.3	64584.4	67465.4	59812.7	430154	59822.8	68860.7	64392.2	72051	68665.7	71112.1
631	385.222	526.319	25652.7	23300.4	24606.6	22591.3	23099.1	23836.1	25770.9	580.537	1076.22	1785.17	1234.45	225.372	935.454	2261.49	559.219	1044.26	2858.12	1416.94	3555.11	2620.1	415.3	1184.88	965.334	1137.78	761.086	686.867	2148.01	5719.72	3070.2	779.02	1390.95	586.16	404.609	433.137	416.501	212.17	693.846	1093.52	497.955	256.807	2435.42	1237.8	447.706	859.314	1081.33	730.23	684.069
632	385.259	798.216	59693.3	58132	65918.7	61751.3	63553.3	61965.6	61911	280439	362306	94363.8	356149	617050	347336	295685	279764	486337	2.00449e+06	142777	182127	251081	184259	383959	176318	218141	497651	230988	572042	196561	224053	251897	189777	54880.1	70314.9	63474.2	114335	43244.8	88894.5	87474.5	77720.2	109068	335010	130311	101620	96941.1	111990	82765.7	44451
633	385.351	855.794	17194.6	18784.9	24034.8	25982.7	24250.1	25376.7	24374	133232	137363	130690	139195	124469	124393	276444	191176	154631	95529.9	116666	123115	87785.5	38578.3	68370.8	63279.5	102320	109642	106187	93197	118924	99029.4	116994	91875	17324.7	16828.5	15527	17241.8	17729.7	16468.3	17012.9	18166.6	16248.5	114288	15417.1	18410.2	17147.4	18223.7	20148.5	20094
634	386.273	334.905	11336.5	13174.3	13373.9	12753.3	12784.3	12459.3	12201.6	19737.6	21651	10268.6	21196.7	24441.7	15182.1	27517.6	20367.9	26189.4	54013.4	18580.4	44499.6	89179.6	16145.4	17433	14685.1	22854.8	19924.3	18876.8	73939.2	22254.9	85981.8	24876	11886.7	12734.1	11343.7	11856.1	14586.9	11587.6	17691.8	10388	9250.92	10231.3	51430.9	12554.3	6811.52	12986.2	11217.8	9275.5	9003.17
635	386.353	855.148	3047.92	3497.47	12140.3	8867.97	12598.6	12480.9	14548.6	22257.7	24248.5	22238.6	21004.1	22262	19647.9	45165	33151.5	26586.3	13114	22487.2	21409.5	10457.3	0	9662.25	1732.77	13932.1	16982.7	14085.4	12230.9	18698.7	13011.9	17227.1	13350.3	4553.45	8653.43	7300.63	3561.56	9962.09	2191.26	7877.3	11072.2	7423.02	14490.8	8611.35	8616.91	3008.19	4573.23	8976.58	11884
636	386.263	798.069	15138.8	13233.9	15487.3	17117	17234.1	16538.1	17019.2	65907.3	83991.4	21990.7	80037.9	144111	77229.9	72971.7	67373.1	111298	455379	35463.5	41624	53740.4	40280.2	90153.6	40374.6	51536.5	111633	53964.9	131723	46062.5	48110.9	57848.5	44602.3	15122.1	16979.3	16307.2	28279.4	10371.3	22445	22475.2	21587.7	27098.9	73165.3	34860.1	26121.5	24559	28299.3	20733.4	11856.5
637	386.326	670.561	3732.66	2977.47	10601.5	11322.8	9227.87	11515.8	8849.19	22254.2	24466.6	24318.5	20048.6	19692.9	21544.6	41077.2	24361.5	23138	14065.2	24060.5	28408.5	18196.1	5131.89	17003.1	19411.3	18339.7	19777.4	20505.9	10224.5	19146.5	20231.2	21973.4	15593.2	2739.35	2670.77	8629.88	2286.38	2568.22	2278.67	3337.45	9005.76	3504.82	21454.4	2963.5	3129.26	2400.2	8963.34	3596.3	8609.72
638	387.18	533.711	78725.7	76702.1	77719.4	78751.2	77820.9	78463.7	79919	720640	711701	657354	942903	638649	841938	1.07605e+06	775451	912905	3.4436e+06	499451	1.47273e+06	1.1423e+06	361341	392016	717698	569887	679654	553451	1.68253e+06	500298	1.66263e+06	490915	320125	114586	71962.1	103056	102864	70356.9	87118.1	116627	60081	118916	1.70722e+06	90778.4	78882.2	91021.6	89757.9	134762	95989.6
639	387.28	800.447	4580.45	2315.74	4283.8	8268.82	7561.66	5474.79	8352.91	22311.7	31921.3	9272.96	24660.9	54812.5	25489.5	28502.4	25136.2	49164.6	167088	14035.9	14232.3	15173.8	14345.1	35077.9	6925.24	18312.3	43582.2	19139.3	47748.5	14125.6	20076.6	18791.7	13528	469.584	1156.45	856.368	7614.54	744.475	6494.25	1185.71	5600.68	8522.23	27331.2	9675.56	8176.81	7950.25	9077.23	801.466	827.772
640	388.188	533.368	21857.5	20112.5	19916.8	21516.4	20359.7	21697.8	21443.1	171906	170503	156671	221482	152811	207077	259768	185933	223332	806676	120447	349043	276150	90431.9	93235.6	168542	136459	162541	131940	395687	121054	394734	113081	76380.3	28173.1	20210.4	24888.4	27870.8	18784.1	21858	29130.4	17493.6	33920.2	402163	21840.9	19640.8	22518.3	23820.4	35234.6	23868.3
641	388.316	767.821	43499.9	44980.6	47073.9	45227	46459.7	44712.3	46314.6	168570	246734	88972.7	164192	377109	142890	132988	169444	288698	1.02789e+06	177474	56319.9	88029.2	162937	212274	147389	196322	275949	168381	152949	143899	86936.9	153853	169482	34107.2	43128.5	37270.5	69073.9	39768.5	62269.7	71060.8	60214.5	71925.2	119684	84271.9	58814.3	42146.3	84488.2	54494.3	27960.8
642	389.254	550.456	6315.24	5375.84	5731.19	6740.91	5965.94	5564.34	5637.79	27822.3	27133.6	25894.8	36447.6	24727.2	31282.2	43959.6	29829.7	36420.9	132372	21007	62280.8	44934.4	14591.6	14974.1	27991.8	23067.3	26043.1	21595	65541.4	18863.6	65670.1	20591.6	13894.2	1530.5	1296.7	1740.83	250.202	1530.79	1067.86	1072.41	1383.74	1180.34	71222.3	1200.5	922.128	1419.15	818.727	1199.02	742.85
643	389.217	509.77	59739.1	63995.6	66819.3	63607.3	63030.5	67327.2	65844.5	1165.72	861.505	956.443	727.821	1136.37	803.266	1411.46	780.792	1031.33	3135.59	730.899	4408.45	2777.78	497.73	652.209	487.319	0	278.691	132.246	3508.16	509.269	3241.96	1082.83	400.3	9065.49	5694.73	5338.2	5177.44	1094.87	10163.6	4649.68	3106.74	2729.3	2916.36	15717.2	6341.67	9592.53	7668.39	2501.95	8564.83
644	389.317	766.826	9726.85	10938.8	11261.5	11487.5	11484	12217.3	10174.8	43972.8	70896.5	21570.9	41044.6	102383	18820.4	35081.4	49820.5	80541.1	261495	48568.1	10616.1	11506.1	41349.5	55818.7	24355.5	53883.5	74686.3	47921.5	40695.4	37339.3	23453.7	41829.7	47666.9	8836.93	12138	9918.49	16542.9	9145.38	16231.9	15911.4	14673.9	15222.6	25314.6	21294.5	14236.6	10547.8	20995.2	14289.2	5637.64
645	390.221	509.823	13816.3	13190.9	12999.7	14154	13442.1	14172.1	14466.1	230.58	390.937	384.246	475.525	929.764	596.333	855.692	226.546	811.385	1574.28	350.6	2797.33	2600.99	206.298	255.68	604.267	592.848	376.142	596.326	2476.64	615.486	1835.14	0	373.101	1582	863.905	511.746	568.92	908.168	2217.64	784.84	837.612	1356.84	1293.65	3759	689.916	1932.02	2244.15	388.475	2902.32
646	390.336	569.493	3645.46	2902.96	3289.83	2980.14	2973.7	2555.04	2200.83	14351.8	11943.8	13137.5	12113.2	11428.9	10036.1	13132.4	12310.9	13682.9	84976	10217.2	7889.52	6871.12	9900.13	11037.2	11402.3	11678	10590.3	10767.2	11791.8	10509	8557.86	8751.64	9648.89	3046.59	2183.25	2450.66	2342.22	1094.35	2198.7	2520.46	2185.27	1892.7	9168.15	2908.74	1183.33	3152.08	1618.12	2312.13	1818.95
647	390.286	776.327	50813.8	51748.2	55400.3	50395.8	52345.6	52853.1	49580.8	177437	233530	36619.2	232636	407413	288989	170623	209395	325124	2.4572e+06	114853	135672	261483	131758	277978	96598.5	118736	280159	115252	388529	136657	123020	167352	113690	53833.1	62114	54263.7	123810	43943	84727.9	83799.4	77557.6	79037.3	267161	107937	90155.3	85239.8	96384.3	67708.2	37350.5
648	391.342	827.473	12908.5	13362.5	14585.2	15844.8	15220	14275.6	16880.1	22259.9	31208.6	20730.8	19752.1	20975.3	20603	29784.9	24583.3	27627.6	46533.8	20822.2	19463.7	1107.79	11037.3	16616.6	8777.02	24264.1	16612.5	22060.5	28787.4	18398.1	15261.9	18109.7	14634	12588.2	11781	15115.9	12534.3	12703.2	6841.08	6505.17	6749.65	6354.46	16316	7891.6	15330.4	13189.7	15706.4	11737.4	11458
649	391.288	775.957	12158.3	13360.1	14423.1	13580.7	14304.5	13119.9	14818.1	38915.4	52324.2	8883.18	51638.1	86131.5	64360.9	45618.9	51290.2	77791.5	540251	25377	30786.9	62039.4	26815.7	61734.3	17757.6	28225	63421.7	28691.8	89074.5	28524.4	28786.1	35915.3	24027.3	13091.6	14981.2	13281.7	29343	11215.4	21605.4	20091.1	20890.7	18682.8	58143.5	24075.5	21529	21590.6	24495	17235.9	9579.22
650	392.228	481.956	22006.6	20212.6	18914.7	22552.1	21819.7	21423.5	20442.5	268.941	463.893	242.027	774.624	998.526	372.067	1738.43	694.804	1530.21	1776.52	962.969	1143.43	697.243	228.187	306.676	277.741	166.466	939.197	699.791	1885.43	513.337	1240.35	446.033	106.446	0	0	157.262	0	0	236.297	113.288	199.407	116.076	1270.25	0	428.845	0	112.112	0	0
651	392.272	527.927	6932.19	8816.04	8665.83	8497.21	8533.12	8306.62	9326.1	2648.34	2360.67	2518.92	2649.73	4472.31	3218.04	5528.39	7559.19	12910.1	23876.1	10023.2	18070.4	14429.1	4295.24	3332.92	7688.68	2538.53	5665.12	2363.53	19522.3	15373.5	6658.15	4560.47	3145.24	3165.31	3910.59	4067.06	2937.63	2761.19	4203.79	3906.58	4307.09	15049.5	28145.6	2291.64	1983.35	3403.36	1550.38	5287.04	1996.4
652	393.233	777.446	15554.3	15104.9	19932.6	20301.2	22002.5	23157.5	24283.1	43061.1	49523.7	12458.2	40264.3	69082.1	36437.7	59756.4	50685.5	81490.7	305069	20398.5	19664.1	24014.5	7246.54	42388.7	0	31419.8	57486.5	21229.4	40756	21299.1	23109.5	25547.4	18916.8	12260.1	20753.3	13749.4	27789.1	14854	26485.5	24711.5	23615.3	26714.4	39086.6	33755.1	26025.5	15014	32415.8	27445	11432.5
653	393.286	566.456	96020.5	90307.8	93538.4	96710.1	95195.3	94456.9	92554.5	6218.55	6971.44	6794.28	6402.34	5638.42	7505.79	18519	6266.54	7595.27	11499	6145.67	7116.73	6945.13	1888.1	5833.02	5879.54	8307.22	6899.94	5575.94	9156.1	6006.2	9442.87	5796.85	5889.46	110699	104712	152286	121828	134390	118916	130997	124227	119980	6607.09	115505	154810	132669	137535	129209	147674
654	394.352	786.63	65987.9	68557	79266.3	85186	86032.7	87139	87665.9	85967	89089.5	81256.9	85408.4	80936.6	78177.5	135928	94788.6	85859.6	126895	76653.7	79777.8	64796.4	54773.2	74822.8	44643.6	75151.2	76322.2	80776.6	84966.4	74592.7	70600.3	75729.3	70532.7	73177.3	91240.8	117616	98513	68876.7	97507.2	89559.1	79573.1	84480.9	74646.4	99014	118604	86203.7	136047	92140.3	70664
655	394.291	565.124	30317.2	30445.8	30472.4	30624.2	29668.6	29279.4	29394.5	4794.96	11024.3	11881.3	7563.3	14724.4	13285.8	14264.3	14467.9	20487.9	46820.8	11786.3	14724.5	17114.4	4194.28	9011.78	8739.63	5891.25	12726.3	6177.01	12467.1	12670.3	11987.9	9717.28	9221.31	31025.6	30438.2	43053.1	33161	38004.5	33757.4	36533.5	33145.4	42866.6	9985.77	31798.7	40011.6	36599.2	37099.7	42648.9	36859.6
656	395.249	776.966	36460.1	43611.4	50703.1	58380.5	59121.2	62673.4	65963.9	198254	328300	39829	273724	433386	283341	253550	400498	540985	2.49028e+06	119451	142284	217667	58177.2	265656	25144.8	104616	308822	124342	420207	144668	126378	186573	117161	54447.7	61084.7	50306.4	120657	47445.6	88273.1	81031.9	75363	78486.1	292529	102920	99962.9	81212.2	86465.8	74619.7	39479.4
657	396.309	583.601	11930.1	11892.4	13527.3	12381.8	10960.3	12096.4	10915.3	7496.86	10685.4	15532.6	8041.98	42800.4	27760.5	10316.4	20132.7	26722.6	91689.4	17220.1	19025.4	33208	9043.05	14128.6	8751.96	6538.78	30302.2	6745.17	16254.5	19756.4	11904	11001	13846	8653.02	7844.15	10574.1	7463.09	5636.67	7937.02	6635.56	4589.69	31711.4	17138.3	5829.48	7131.41	8244.5	10056	19987.3	3962.88
658	396.251	775.636	10372	10415.8	14702.7	15354	15018.1	16687.2	15799.5	41597.7	79493.6	9091.3	63901.1	94936.8	61295.3	64856	92072.1	125611	581559	26916.3	30322.6	44829.7	9540.88	63951.8	1477.54	22910.8	69274.3	30463.9	95778.6	33289.3	27924.8	42528.5	26636	12203.4	16243.8	13253.1	26180.7	10698.2	20347.3	18857.2	16814.6	17189.3	57633.5	22759.4	22993.3	18723.9	21489.3	17831.6	8696.08
659	397.185	482.669	96150.2	93511.4	94863.3	97051.4	91136.6	93254.1	97914.1	1057.4	512.975	826.488	820.055	153.573	956.403	3062.27	399.139	1010.71	2025.2	454.723	1050.99	907.605	243.991	647.945	405.09	117.914	476.76	103.862	2998.97	267.78	825.206	1052.83	143.051	460.867	0	108.011	0	355.767	104.096	400.151	367.704	257.577	1777.49	0	108.807	219.408	397.887	368.999	108.184
660	397.303	776.002	6911.88	6813.51	9994.07	10487	12242.6	10041.3	11211.8	1605.68	16233.8	846.849	17694.1	22209.8	10240.7	27356.6	16659.2	26462.2	104509	2114.46	628.68	7664.13	0	19044.1	0	12502.7	19334.3	1614.14	34448.7	0	2057.61	0	726.732	1344.53	2751.07	7787.19	1675.29	2364.3	2044.79	2160.29	2366.9	1602.05	10541.5	2146.8	9562.27	9191.1	10678.4	1506.42	570.953
661	397.231	582.587	11008.7	9825.5	10775.9	10918.1	11195.8	11858.8	11125.1	15078.4	13518.7	13106.9	14141.2	20899.4	16707.1	17224.5	15665.5	15492.1	55165	14360.1	20076.8	20988.4	5896.29	11888.4	10963.7	17051	16772.3	12082.3	26242.5	12021	17529.7	11649	9163.02	10414.2	9727.85	4817.21	6745.84	9498.8	10263.3	9905.85	9071.22	8249.84	17624.3	10284.5	3311.87	9730.26	4465.45	13337.4	6612.33
662	398.326	601.986	23327.4	22997.7	21717.5	22850.8	20425.8	22376.2	22041.9	3536.05	10550.6	11550.3	4108.36	47717.9	22072.9	21251.4	16979.4	28070.8	72376.8	16297.5	30841.6	44077.2	9577.05	14085.1	13587.8	4077.8	22505.6	2849.01	17608.7	22504.1	24338.5	1985.74	17789.1	17076.3	15567.2	16015.6	24984.9	15747.6	14029	18378.8	14000.1	50563.1	14276.1	15064	14179.2	17362.8	29680.1	36336.7	10291.6
663	398.238	501.872	11377.3	20066.1	18865.5	19682.6	9097.13	9739.5	9930.14	17398	22520.9	9752.84	19352.3	23117.4	13523.9	19850.1	17693.6	24167.4	40043.8	18085.8	38179	72148.2	14776.8	20088.1	13427	18104.6	18702.1	18120.4	53440.4	20682.7	59260.2	19777.2	13162.7	10347	9105.27	9062.77	10772.8	9373.82	12096.5	5512.87	4058.03	5689.12	42260.8	10165.5	4327.66	27409.5	5340.64	5267.59	4791.59
664	399.238	552.216	25613.5	25875.2	26786.5	27530.9	25576.2	27367.7	26468.2	2608.19	1762.06	2049.22	1923.75	2087.91	1635.4	5890.87	1922.63	2141.75	5414.65	2397.63	9174.9	8060.23	4766.09	2235.29	1893.85	1508.65	2551.46	1581.41	8108.51	3077.48	7019.43	2202.62	3081.05	1686.67	3720.93	8297.47	5641.94	2517.44	2735.69	3289.28	3011.06	2788.94	25391.6	5562.9	3436.52	2984.5	2926.77	2829.11	8530.51
665	399.188	367.831	12514.1	12341.3	13137	13334.4	12725.5	13312.7	13874.6	215.518	451.021	369.837	324.943	371.039	0	719.257	365.249	457.304	884.46	0	377.566	1344.55	236.429	128.728	104.439	447.418	258.923	108.171	1492.7	481.381	1673.81	517.109	103.672	608.584	506.032	342.101	580.876	221.146	1169.96	424.253	1201.06	1108.6	998.698	822.461	542.867	118.296	557.067	547.385	399.482
666	399.281	606.252	12992.3	13441.2	11098.3	12258.5	12164.1	10499.5	11499.2	1700.95	3243.36	2374.52	1905.74	5722.98	3427.77	4647.18	3361.68	5015.5	13722.9	3504.03	4461.18	9491.34	0	3627.58	2757.33	1583.15	3816.32	1300.97	5530.22	4624.7	5737.64	1308.73	5082.65	5469.42	4912.23	4848.03	7774.32	5152.83	4198.82	5497.37	4554.03	12760.3	4671.58	5101.62	3890.07	4993.55	8103.63	9690.95	3567.45
667	399.28	798.672	19044.4	13997.2	16875.3	17013.2	20816.5	18803	18131	61956.9	99248.7	36847.1	60752.4	159628	64474.5	85188.3	78271.4	166052	485249	48761.9	35972.7	17241.3	58982.1	91173.9	44673.6	69762.2	127867	60281.1	150289	43553.2	77629.6	62276.7	44890.4	26425.7	17645.9	21150.2	24101.8	11453.4	23600.9	23639.2	21404.5	28628	77206.9	31823.8	30694.1	29890.8	36760.2	22908.3	20209.5
668	400.343	652.714	51752.5	50721.3	50279.9	52074.7	51479.6	48870	50263.1	125300	94215.8	111570	98568.1	177251	131609	109409	119337	179325	912900	126421	73146.2	75930.2	92633	95092.2	201575	95024.2	143718	92537.2	103767	125810	64012.4	90431.5	111402	49817.7	91729.8	71013.2	96111.1	90063.9	74666.4	80416	105295	107817	55722.6	76825.5	67910.1	10375.3	97828.2	117558	73626.3
669	400.828	38.7589	6314.34	6383.09	6346.73	7028.14	6687.59	6934.75	7381.78	13276.8	13402.1	13289	14899.4	14492.4	12497.1	18249.3	14910.9	17541.9	22119.7	13701.6	23631.7	23130.2	12770.6	12661.1	14322.2	12337.1	13695.3	13965.2	22212	12768.2	21350.9	12230.2	10856.1	5635.65	6462.02	6667.97	5812.19	6576.7	6319.34	6481.76	6715.01	7133.21	23311.6	6472.04	5744.68	8459.18	6576.35	5507.14	5393.18
670	401.345	634.235	13289.1	12575.7	11228.5	13630.1	12076.2	12080.1	12417.4	29197.1	253.129	28842.6	22403.5	231.87	29756	26386.6	29089.6	46253.6	224560	30583.7	20448.4	21957.2	0	308.775	46898.6	23808	35099.7	361.25	2275.06	31214	2462.32	733.008	28675.9	11850.6	21651.9	17893.8	24809	22915.9	19102.1	21291	26039.4	27540.9	2215.46	18146.8	15504.4	19703.3	25161.4	29319.8	18825.8
671	401.186	365.821	13336	13539.3	13117.7	13887.9	12398.7	13224.8	12683.1	3862.62	6072.96	3000.39	5758.63	5887.99	3696.81	6937.78	4917.1	5362.05	12929	4936.05	10912.7	25528.2	4699.12	5196.26	4281.89	5788.01	6004.36	4444.66	17567.6	5469.2	18931.6	5418.39	2727.02	3385.73	3512.18	2765.84	3247.07	2282.61	5212.55	2488.27	1938.99	3342.76	12982.6	3411.45	2064.4	3158.71	3968.1	2193.95	2565.16
672	401.291	821.572	39465.2	25072.4	30018.9	31512.1	30653.3	30265.3	30049.8	126772	206286	74660.5	127706	358879	126574	160746	140825	342991	961115	90083	79082.9	56585.4	113851	200011	95362.5	122765	255560	116772	319057	77861.9	158520	128177	80689.3	29263.9	26342	26297.4	42785.4	17344.8	38266.9	39951.6	33358	46248	159792	52854.3	44039.9	45736.2	48279.8	33690.2	24804.2
673	402.286	797.834	24472.8	23315.1	30458.7	28784.7	26811.9	27683.5	28759.1	104947	141400	52718.7	131281	237255	134110	118659	110102	191992	739277	52004.1	65399.7	91906.9	71065.3	147551	67299.1	84704.3	192757	86699.2	216195	76457.8	83966.7	99188.8	68936.9	26357.9	29303.4	27661.1	48719.1	20035.9	39224.6	38890.2	34079.3	45267.4	125755	56653	44199.1	40426.7	49714.6	35808.1	17850.4
674	402.394	684.383	0	110.125	481.34	109.685	0	181.499	0	79299.3	171430	116237	67490.1	66155	63884.9	56189.1	77067.3	84861.9	423859	62875.8	21332.9	21544.9	45702.9	61077.4	75822	69112.8	62680.4	94244.8	92254.7	73475.1	11334.3	65046.2	60484.1	0	223.379	427.83	0	227.604	122.987	733.434	0	98.935	19096.6	101.844	119.065	17278.6	436.092	0	102.35
675	403.233	530.469	97724.3	97058.6	96791.3	98449.2	93385.3	96462.8	97793.5	697.228	215.525	458.711	762.455	642.858	600.033	1418.76	728.523	1039.92	4995.59	837.177	3462.42	1796.96	106.628	229.211	1028.25	0	646.758	231.216	3600.22	736.947	3655.26	492.098	780.662	24457.3	15886.9	29348.2	13153.2	5815.75	31007.4	11301.7	7583.4	9396.24	3346.73	47415.7	27393.2	30330.4	55657.1	6212.95	23237.4
676	404.218	533.231	53089	51096.8	51915.8	51863.6	52988	51720.9	51920.3	383193	371706	341587	495271	343505	443905	586084	403560	488139	1.70705e+06	265216	772993	583628	182341	203781	376052	287751	351579	283834	859971	257114	856338	261352	168579	48889.9	32602.2	45002.3	43169.6	29575	38046.9	46230.4	25010.1	50311.7	858506	42545.8	34403	46612.4	42248.1	55449.5	40468.7
677	405.216	533.291	11238.5	10982.9	12322.9	12119.4	12520.1	11929	12857.7	98221.6	93603	85726.7	120833	83126.5	112509	150608	105174	127359	419246	66868.6	192524	145730	46368.4	50881.5	94172.7	75804.7	88804	72840.5	218986	65461.2	211763	64548.8	42528.7	12204.8	8167.15	11162.6	10401.7	7898.39	9508.34	11235.2	5915.7	13455.7	216107	9808.86	9112.28	10902	9775.02	13584.9	10320.9
678	405.3	579.259	8508.6	6964.5	7607	7526.63	6577.26	8540.66	7699.69	16145.1	19409.4	7639.46	16367.2	21882	14310.7	15916.8	16997.8	23727.4	36564.4	17624.7	38780.2	55469.4	8960.13	16556.2	13917.2	15627.1	15808.6	18209.1	39055.8	16503.7	41970	19348.5	15581.2	7700.02	7246.49	8186.16	7074.08	6490.74	7728.83	6182.96	2591.47	8081.33	39537.9	9713.24	8836.96	8034.57	8073.08	7227.66	7340.14
679	406.33	855.42	20378.2	27386.7	39334	45002.9	45821.5	49501.8	49862.4	264483	317988	279408	339663	330171	290483	1.25184e+06	962990	858510	352399	259327	231178	145464	30715.4	109716	83061.4	162441	201153	173255	134568	225962	184308	246044	173382	26723.7	26668.6	24116.1	25328.8	26485.1	23553.7	26081.7	25555.1	23251.1	205679	24166.7	25796.5	26682.2	33695.1	30598.3	31185.2
680	406.245	509.434	24894.8	26273.2	22439.9	24230	24467.4	23565.1	24854.2	1244.16	1943.9	1295.79	2720.92	2264.8	3013.54	2704.53	1924.32	2591.94	105454	11934	4307.93	4450.09	2397.8	1863.67	2685.09	4326.93	3797.24	1337.93	2955.25	11735	4592.3	2199.7	1332.33	579.967	1205.73	1641.21	981.43	708.19	426.876	1038.62	682.977	1456.2	4278.09	955.678	842.151	1253.27	1031.76	1429.43	1627.35
681	406.281	556.369	26030.2	27816.8	28114	28008.9	26502.7	26502.9	25537.1	17145.1	15459.2	15867.9	19494.8	15101.9	18664.3	23570.4	16686.6	20227.7	3199.08	436.453	32082.5	25365.4	7685.11	9846.07	16245.9	12447.7	14577.6	12583	39410	527.071	38587.9	11231.5	7108.91	225.173	549.23	490.836	214.601	313.445	232.634	316.556	0	455.164	36895.9	571.448	267.908	244.058	0	256.672	255.026
682	407.243	797.867	20619.8	19709	25279.7	29262.1	29863.3	33091.3	31310.5	164527	232264	49864.2	143866	320903	201424	177567	257435	684770	3.20384e+06	191702	71702.9	73912.8	31585.8	145357	25908	74717.2	187974	103152	229728	65128.7	109312	86840.9	61817.6	24788.9	27104.6	28537.2	48016.7	20175.4	36946.9	35892.4	34116.2	42173.8	136257	56801.9	47724	42299.1	46872.3	39010.3	19807.5
683	407.333	855.467	4409.82	7601.59	11746.2	12724.5	14748.6	15236.8	13894.5	73317.4	87197.2	72746.2	87058.2	88397.8	78975	319770	245326	218100	97963.1	71061.9	61775.7	40298.2	2897.23	29186	16195.9	42216.1	56266.5	45172.9	44087.8	62360.4	50917.6	65253.8	45905.9	7392.15	6710.55	5428.75	6807.32	7470.76	5926.68	7285.81	6694.5	6307.77	58457.8	5243.81	8411.87	7548.39	9749.94	10935.8	8743.62
684	408.361	826.401	32003.6	42705.3	46021	50433.9	49087.7	54023.6	53772.3	84002.2	115205	83246.4	71591.5	75163.8	94895.6	224335	172018	181030	294874	68494.4	58948.5	37242.5	44410.8	63461.1	59435.3	78645.4	74529.4	60448.8	75737.2	60030.2	53572.2	62805.8	54702.2	42221.6	39861.4	65680.8	37514.5	38017.2	33398	35534.5	32148.4	33480.5	56518.6	33587.9	84963.9	41926	108708	37618.1	42052.4
685	409.187	229.805	17477.8	16760.8	17394.4	18517.2	15861.7	17423.5	18353.4	24898.8	36985.2	16900.3	34161.1	36768	17026	68857.5	68400.1	105511	137002	53572	160061	178599	45094	35854.6	50214.6	25206.3	44155.1	56428.3	218329	40880.6	112542	22914.4	34972.8	17723.7	23963.6	15970.4	19199.4	15333.8	26902.8	16139.7	18194.2	11093.6	217013	19091.6	17780.3	19549.6	8470.72	12409	23977.3
686	409.162	534.49	46679.1	46285.4	47792.3	46456.1	47825.1	48259.5	48023.5	443421	493299	459625	575163	438453	529005	569408	498252	555111	1.18823e+06	385527	731640	669298	262188	335944	485217	413924	448957	403829	793769	400179	807923	357703	298358	66188	51224.6	63701.4	63582.9	49373	56667.4	66282	40098.3	74762.2	794859	57001.2	56199.6	69975.2	55750.5	75521.3	61430.4
687	409.369	816.125	12166.8	10275.5	12984	14918.5	15177	13948	15539.5	20358.4	27196.6	18557.8	17961.1	18770.3	18140.3	42333.6	21644.2	53488.3	31466.8	18236.8	18494.4	1371.1	8907.88	15847.6	5470.5	20659.6	14791	15527.1	22122.1	16190.2	10076.6	17547.4	14980.8	10631.8	12624.8	17094.5	9893.47	11557.9	10028	8698.76	10341.6	7732.96	14986.7	9630.57	21931.5	12539.3	27874.5	11061.3	11987.3
688	410.166	536.748	11176	10152.6	11300.5	11458.7	11721.9	11970.3	12304.9	107899	114909	110302	130317	101595	127517	135898	117371	129228	278192	93156.5	171524	160572	59134	78592.6	112525	99675.3	103256	95005.2	187583	94319.4	186117	83263.8	67082.3	21517.7	11033.4	20482.5	22045.9	17899.1	19143	21191	15300.6	21956.6	184763	18643.1	19146.4	21215.2	19599.4	22921.2	21139.6
689	410.86	38.4712	15862.8	15716.7	14505.5	14946	15595.2	15716.7	15403.9	24627	24831	26180.9	26151	26850.5	25594.2	30663.5	27487.6	29008.4	27514	27652.2	25865.6	24982.1	24996	25133.8	24652.8	24621.3	25411.5	25656.1	23298.3	23806.2	21950.7	24474	23976.7	14756	15369.6	15113	14459.7	14156.9	14997	14004.9	13962	16001.4	25498.2	14509.7	13719.3	18221.7	14215.6	12934.8	13459.2
690	411.235	553.397	26476.8	26012.4	24142.3	26209.2	24252.9	25278.1	24023.4	18106.7	19365.9	17129.9	22267.4	17304.9	21341.9	24038.9	19638.2	21553	48130.8	14786.8	31002	27763.4	10264.3	13713.5	19304.2	17224.6	19213.4	15059	35424.2	17290.3	36939.6	14570.5	11322.4	948.199	2069.48	2209.91	1586.65	1404.83	2604.66	1491.18	1201.48	1294.85	33421.8	1722.35	1887.91	1896.38	1600.4	1085.33	1732.17
691	411.2	507.612	135341	130899	130621	132058	127173	129934	130800	139.285	357.301	301.985	316.779	318.8	250.601	936.374	695.402	652.982	1130.63	923.843	2682.06	1442.24	0	206.89	645.752	105.895	743.304	422.738	1426.06	165.926	1249.82	326.906	421.216	447.143	247.682	111.607	320.474	134.304	360.319	113.841	403.756	261.724	1442.96	106.64	270.398	322.998	449.257	99.5471	116.746
692	412.318	553.48	10719.5	9746.31	11607.2	11860.9	11992	10173.7	12089.2	20871.4	27747.3	15828.7	20801.3	29563.1	18115.2	21557.6	22687	29584.1	55553	23517.2	46334.5	75718.1	17594.9	22286.4	18355.9	19693.1	20436.6	21484.6	51163.8	22053.8	60964.7	21807.1	17131.3	10539.5	8763.2	9959.95	10772	8240.6	10382.3	8133.98	6491.72	9675.02	48039.7	11719.9	7961.86	9590.12	8780.55	8878.69	8269.83
693	412.309	608.917	9481.79	1456.76	1323.36	8153.99	9422.75	8281.72	1111.92	14592	25640.2	7443.6	19107.4	28605	15207.9	15420.8	14852.6	23709.9	32077.1	19841.6	57495.7	82060	11706.7	14300.3	17425.4	15968.2	11891.8	20750.9	52034.9	17545.5	60941.3	20126.7	18466.7	1272.13	1629.41	2019.39	2079.2	6979.54	2051.27	991.119	1759.91	1308.96	52753.7	9964.82	815.306	8491.73	1381.97	1999.96	2101.89
694	412.853	38.4757	7987.61	9171.08	9590.48	8650.4	9909.41	10162.6	10066.5	15124	14327.1	13914.3	15397.4	17246.6	14649.7	19296.7	17741.5	16754.8	15245.9	17350.7	15212.1	14809.8	13685.6	15562.6	15660.5	14482.7	14315.7	14465.2	14252.9	14233.5	14528.8	14242.6	12784.2	9569.98	10362.8	10786	9048.88	9062.49	9499.92	9164.97	8967.68	9620.17	15685.5	9423.91	9062.91	12792.9	8725.32	8179.67	9154.51
695	413.254	574.578	12576.6	12166.1	12923.2	12953.2	11820.7	13594.2	12953.7	3766.34	10861.3	14920.3	3469.05	4030.6	11457.4	12564.3	2647.94	4253.31	7705.87	2983.99	9622.99	7164.39	279.474	1836.79	2861.77	2560.53	2818.83	2433.35	11309.7	3013.7	5317.24	9547.42	2783.48	982.699	622.365	887.979	227.551	754.541	821.415	751.019	1148.26	1410.74	7572.28	1286.23	1378.9	1465.58	1214.28	1019.28	658.233
696	413.291	809.526	17560.9	15949.2	18468.7	19402.2	18694	19360.7	18669	16999	26814.2	2701.16	12905.9	29554.6	14233.4	27180.7	21947.3	36401.4	90065.7	18270.1	13292.2	11930.3	160.267	17694.6	0	15024.9	17232	10108.7	27689.2	2822.95	10640.8	3389.15	1648.99	8323.83	4488.71	6507.45	8092.51	4941.52	8002.19	7791.18	5062.2	8312.78	15533.4	9360.84	10371.9	8059.46	11055.2	8695.59	4503.62
697	414.3	528.547	60687.8	59451.3	63341.7	64180.5	61753.6	65196.9	64419.1	48290.2	22188.5	85165.6	20567.7	147213	31119.2	24820	30234.4	79213.1	293050	33159.5	64371.7	98568.3	49786.3	13720.8	34819.6	9732.17	55562	75977.5	422301	11334	15330.2	126733	16376.2	54056.4	114648	58490.5	17682.6	19209.7	11819.4	24369.8	13084.8	22559.7	118098	79316.8	5674.87	28998.6	67246.6	65767.5	14569.4
698	414.358	727.791	6887.91	8585.31	7989.09	10903.7	10275.7	9056.41	10939.3	90700.3	95732.3	90252	88097	89187.9	85057.9	170060	113432	105902	81934.8	72999	86538.1	60251	40187.5	71452.6	61639	73364.5	78233	79163.7	77404.8	69084.7	76362.6	86116.2	70233.1	7309.71	7127.96	6976.97	7969.82	7886.39	6795.64	7544.42	7981.05	7300.59	78719.3	7751.38	7712.29	7475.87	6673.77	8988.79	7231.37
699	414.357	703.617	27558.9	30158.5	31144.4	33692.1	31141.6	32273.9	32259.1	9904.27	9344.58	9583.9	10033.9	9450.36	9265.97	10784.1	10196.7	9358.47	17800.9	5280.96	11643	7981.99	0	7277.11	7369.96	7009.16	8216.23	8840.05	8792.18	6332.46	11099.7	9326.63	3987.26	20246	19034.6	21154.2	23338.6	23758	19141.8	22166.5	23085.9	22886.8	10233.7	22657	22219.7	21221.2	25214.4	24815.5	20528.4
700	415.213	581.837	577952	585234	587435	588355	584587	586850	592282	1.15997e+06	911128	998726	996725	961580	920112	1.30106e+06	1.14499e+06	1.26143e+06	4.72035e+06	965611	1.3068e+06	956141	553674	842583	863036	948714	1.08093e+06	885421	1.99386e+06	789119	1.14468e+06	765626	695907	693157	596681	167034	576297	856333	655375	675439	758980	792351	1.29414e+06	739884	119917	661956	133169	739208	501403
701	415.303	527.822	19621.3	19076.4	19197.4	18963.6	18365.6	18704.5	20573.1	15840.9	6688.94	24005.4	6232.59	42200.3	8444.1	8332.01	10653.7	22593.5	93330.2	10793.5	20825.5	38859.9	14993.2	3300.23	11131.6	2531.24	17494	22364	119032	3823.28	6224.31	41291.1	4967.95	16377.1	34606.7	18950.6	4570.33	6472.46	6287	11347.3	3397.76	6775.74	31989.4	22195	2295.67	9803.62	20457.7	20632.8	4603.36
702	415.36	727.779	1772.18	1868.08	7210.14	7560.87	7552.19	7253.82	7506.34	28802.1	37215.1	25862.2	30306.5	39495.5	29949.3	46986.3	32966.5	38008.1	73813.1	26459.2	27672.6	15003.5	5847.95	31085	14137.2	25265.9	30774.2	23067.4	19518	16079.7	29663	28949.6	21106.3	1243.58	1117.31	1489.77	1065.13	1293.04	1728.02	1283.68	1073.52	638.47	28254	1953.64	1709.04	1289.52	6174.93	1702.22	1101.08
703	415.306	767.377	13618	11311.2	17508.9	17125.6	17096.3	18331.6	16732.5	343.732	9858.61	306.598	1591.21	5362.97	416.649	13214.8	13055.4	14527.3	22752	703.73	1678.5	2685.17	0	3814.4	0	1020.05	4130.53	261.475	7164.87	577.633	3079.71	1265.65	0	2898.51	3162.45	2824.87	2985.92	1848.87	2931.18	2056.7	1935.03	2518.62	547.522	1846.94	2340.15	2171.93	3414.69	2739.27	2181.15
704	416.216	582.008	146869	149311	151530	148020	152247	151122	151736	302777	241916	267390	263480	248670	245931	337343	297316	325421	1.1718e+06	259556	337726	256586	140909	220408	223693	244427	285141	231333	516982	211277	297198	201693	182042	182995	152535	45204	149216	217223	171871	173818	190791	198056	346249	191029	32111.1	175643	47735.4	192701	131357
705	416.303	764.628	82391.2	83555.4	103331	113823	114907	111876	115236	0	1187.4	0	0	810.325	0	6681.25	1945.62	3855.83	32231.2	0	0	512.167	0	0	0	0	246.424	0	1008.4	0	0	0	0	77220.3	90903.6	79617.1	147994	84873.9	135853	155362	131777	143270	0	187249	128343	81780.8	169874	128274	68797.1
706	417.249	547.791	52597.9	50699.6	55021.8	53969.6	53740.4	55689.5	52565.5	3184.36	4010.51	1701.81	2496.12	3088.92	2498.14	4128.92	4388.71	3779.44	9840.68	4515.34	6030.44	6414.39	467.718	2820.13	2376.11	2450.17	2639.97	2662.75	9006.23	2247.79	6306.98	2767.86	2998.81	2627.9	1778.5	1925.82	2063.29	2375.25	2850.86	1794.03	1831.24	1984.64	7206.03	3540.91	1786.02	3310.9	2093.61	1902.27	2194.73
707	417.219	582.23	26662.2	26402.3	26236.5	26338.1	27428.6	26823.5	27647.4	50007.7	40620.6	44932.6	44070.4	43858.4	40888.5	58748.7	52177.2	57807.7	195951	45448.2	62651.4	44994.8	20327.3	41131.4	38668.7	41521.8	46872.2	42784.5	88138.5	34577.9	53724.4	34074	32499.2	33432.4	27434	8327.41	29280.4	37438.1	30508.3	30066.8	34909.1	35775.7	58118.7	35356.7	6111.27	31270.8	6607.83	31128.6	23577.7
708	417.283	608.747	13341	13041.2	12719.7	13032.1	12127.2	14323.7	14016.5	2634.76	1979.56	2878.43	4877.62	2336.02	1460.88	3137.19	7386.5	7892.09	14340.9	2150.03	6156.62	11455.3	1470.83	3355.84	2070.26	1699.63	1571.72	3082.18	15050.7	3368.13	9960.27	2523.12	5317.48	2571.71	3233.98	3772.89	1919.41	3142.61	1897.57	2347.28	3221.31	3812.64	6037.83	2441.02	2001.25	2216.94	2572.49	2632.85	1402.83
709	418.193	101.095	37012.3	36486.8	37554.7	37885.3	37194.9	37588.9	38262	62015.7	77501.8	30017.5	58088	45685.7	61024.4	87061.6	67926.1	38632.1	102024	18435.6	195074	91394.9	36060.2	43418.9	30851.8	3530.93	231722	34305.5	146111	84458.5	25150.3	113173	8839.06	3961.89	27185.7	30280.2	41194.4	28085.7	29452.1	13961.2	31387.4	56223.8	71116.5	52197.9	60073.7	35255.3	29076.5	5148.07	10629.2
710	418.247	546.148	20607.6	19469.6	19698	20802.3	21033.2	19977.7	19026.2	62259.3	62484.9	60506.1	73838.1	52567.7	70694.9	92659	70819.8	74545	117263	42577.6	75115.5	52245.4	26370.5	38229.4	57908.4	52329.2	56535.3	51324.5	68367.6	39449.4	78933.9	46975.9	28305	12441.5	7081.01	8918.45	8097.45	7240	7378.75	9015.27	6344.34	11313.2	81813.1	7772.4	7324.44	7789.95	7997.46	13095.5	11021.5
711	419.197	101.157	7453.48	7155.94	7552.78	8642.23	6708.43	7005.22	8624.15	14036.4	16829.2	5222.32	12084.5	9908.05	12581.7	17515.8	13585.7	8007.58	18756.1	3739.43	39106.8	18738.3	7761.69	9372.66	6358.95	216.595	44559.4	5649.49	29772.3	16628.7	5969.64	23783.2	1692.76	489.025	5046.95	6521.81	8243.45	5604.32	6418.3	2746.44	6614.04	11151.8	15339.3	10837.9	11360.7	6778.23	5984.42	205.258	979.934
712	419.241	537.886	4928.43	5494.88	5452.77	6079.17	6702.04	5922.91	5563.82	19642.7	22861.5	22005.6	22267.7	19562.3	20974.3	30154.9	24380.6	27357.8	46880.4	18481.3	25328.7	15525.6	9502.13	14545.9	17965.8	18776.9	19535.1	20699.7	23055.8	16280.9	24914.1	16708.9	15551.1	4994.68	4537.74	3662.34	3743.66	3322.89	3756.75	3642.58	2814.11	4024.66	27799.9	4398.07	2715.77	13336	3982.86	5662.8	4193.34
713	419.317	648.846	6342.12	5819.3	13984.6	6790.96	13438.9	6390.6	15679.1	20177.1	27519	10920	23228.1	26916.2	19390.9	16998	20694	28384.9	27273.7	22485.1	69868.3	98314.2	4788.46	16956.3	18890	15898.7	17739.1	23444.8	56452.9	16934.3	62774.6	19629.5	18556.7	4705.78	5222.26	6263.38	4013.89	6914.6	5885.91	5608.77	5888.35	5679.05	54303.5	9506.39	7607.98	5578.42	6928.18	5894.21	4299.26
714	420.266	530.851	36421.3	36023.1	36149.1	37180.6	37570	38770.5	37467.1	15104.9	18098.3	10224.4	15897.2	19200.5	14321.8	17548.8	15751.4	20724.5	34808.6	14956.9	28668.6	43311.1	9928.2	14882.5	14304.1	14952.6	15120.7	16213	32238.9	14112	40810.4	18064.2	12908.5	2097.03	1838.17	1340.99	1472.37	1248.25	3302.76	1999.16	656.521	2400.13	31001.9	1926.88	986.676	1244.68	1748.31	1955.13	1495.97
715	420.885	38.0371	32281	32936.5	35579.6	31307.4	34721	35516.5	33917.8	45779.3	43673.2	45330.8	46883.5	44496	42193.6	46406.8	46102.2	44943.2	32372.2	41717.2	31964.9	30417.5	40864	41855.9	43886.6	42709.6	44878.5	44342.4	31768	43279.4	30974.9	45888	40812.5	35085	32131.6	33476.5	32724.2	34525.2	33168.1	33253.9	31920.5	33046.1	32654	33191.6	31444.9	33510.5	30998.9	31775.4	31883.3
716	421.181	365.788	23398.2	23825.6	22932.2	22705.9	22719.2	22442.8	21846.4	319.504	119.823	0	0	203.232	117.82	360.441	103.338	218.531	677.582	111.063	467.73	492.794	0	229.483	114.757	243.309	0	405.611	490.765	130.263	400.406	208.986	105.114	355.581	732.964	696.234	0	444.388	152.139	104.822	1149.64	953.67	642.96	305.07	123.047	369.538	1220.13	969.713	125.849
717	421.317	566.655	91396.6	90273.8	93013.2	92094.1	89220.5	91826.8	93700	768.434	1218.15	708.026	905.613	1779.93	1228.02	796.425	870.657	1417.58	3175.56	1527.5	3350.36	3675.42	0	797.712	1480.57	1677.93	684.821	820.039	3956.71	1513.89	2686.33	903.864	602.814	107032	98186.7	144297	120653	130345	113407	120092	119756	115954	2501.93	107571	149395	126294	124764	128789	144845
718	422.239	461.007	9337.06	9344.79	10094.5	10269.6	9652.66	10513.7	8978.99	0	377.069	211.835	230.856	0	422.502	606.656	218.893	628.96	1146.68	665.452	1055.08	389.195	434.17	325.639	128.342	497.323	200.385	478.662	1270.6	0	1206.14	584.761	0	1141.08	1020.07	441.225	555.518	447.542	765.141	1058.41	573.273	646.05	1441.07	298.821	223.491	466.719	725.967	359.321	354.61
719	422.887	38.3828	12377.1	11638.6	12402	13809.8	13412.8	13041.1	14061.4	18010.6	17381.4	18185.7	18328.6	15679.8	16824.3	20561.7	17881.7	16710.5	15051.8	17972.2	14331	14707.3	15493.2	17278.7	16654.6	16241.3	17221.9	18812.4	15688.2	16543.9	14579.2	16659.7	15445.9	12460.2	12988	13166.6	12587.9	12661.8	12803	13595.8	11490.8	13179.5	15075.5	13119.5	12544.2	12369	13681.2	12223	13141.6
720	423.274	821.181	16676.1	9374.58	13587	16056.3	14517.9	17967.7	18501.7	56454.6	105399	32836.7	54857.1	152396	51836.5	136537	117366	312699	1.0483e+06	94362	30481.5	12458.2	27456.2	65032	17626.8	37487.8	85744.9	40199.1	118010	26016.2	52183.8	53067.7	24849	14001	11896.1	12546.5	21821.5	8728.63	17854.7	17556.9	15481.9	20989.4	58902.5	21967.8	21518.8	18524.7	21180.9	19968.3	10848.5
721	424.363	746.927	30163.7	37510.2	39427.8	40504.5	40947.2	39273.4	41437.3	36098.5	64760.5	33314.1	29194.7	38177.8	33543.9	56238.1	34348.5	43732.3	65033	25440.1	29075.1	27339.7	14788.8	32161.4	65501.6	41695.3	27953.1	27639.8	54954.4	25258.3	29674.9	28617.8	24223.6	30103.1	25993	29328.9	24454.2	24969.7	22428.7	23008.4	22625.7	20831	29323.5	21677	32774.4	26276	35209.6	24553.8	24494.9
722	424.342	631.434	107734	104013	108770	110019	104061	110876	107017	90439.2	125981	152845	128986	236167	175506	164655	184889	197257	1.11212e+06	208641	172316	167066	114145	128446	181924	80039	308797	133993	254280	197590	77675.7	132154	158259	97289.7	119687	96076.3	86442.1	86309	111111	66888.9	90786.2	138379	67222.4	72995.6	116774	73032	106035	138264	52853.7
723	424.886	38.1507	5341.28	5364.48	6101.71	6133.13	5925.99	5313.96	6044.95	4577.84	6203.35	6241.33	6075.52	5628.97	5926.9	7255.51	6536.18	6955.64	15034.1	5069.1	5739.85	8014.05	5229.44	6719.58	4439.18	5035.45	6392.34	5607	8880.35	4388.13	6822.52	5548.23	5408.75	8746.76	9560.81	9178.47	7536.41	5753.25	6149.48	6973.81	5351.43	5961.97	7629.9	6576.77	9029.11	6945.35	7828.38	8474.02	4924.19
724	425.207	531.082	164312	160922	163011	168893	167415	166905	169890	65027.4	61946.6	63720.1	75838.9	55520.3	70205.3	69259.4	64402.4	69065.4	144928	47077.3	85731.4	65007	33216.8	42333.5	62533.1	54037.1	56822.9	53970.5	84239.4	48045.3	93733	47283.8	37658.4	15829.8	9661.69	12706.1	13974.7	9610.86	11193.8	15750	8274.89	15832.3	92047.7	13699.2	9819.45	12188	12411.8	18472.7	13162.5
725	425.345	617.207	27077.6	25583.3	26306.3	24684.9	27209.2	27130	27755.6	24114.9	32873.6	41609.1	38068.3	61216.1	50551.4	45269.9	50027.1	50732.1	297327	58246.3	49007.8	46864.6	27797.8	34187.6	49558.6	21316.6	78466.5	35508	64858.3	51034.9	22992.2	35201.5	42711.8	25684.7	31522.8	26448.1	23424.6	23577.6	28795.4	17139.9	23969.3	36653.3	18363.3	19531.2	30096.4	21242.3	29631.9	33627.5	14242.1
726	425.26	841.373	19609.4	20677.7	22212.3	23859	24780.4	25410	22900.7	49525.5	63042.5	27608.1	38970.2	100752	38392.2	60745.8	43544.2	94954.6	393428	42794.3	26168.5	21896.6	28773	57615.3	28070.6	54800.8	72819.5	31557.5	66627.9	28978	48297	38688.8	31795.1	26981.5	19326.7	21450.1	31599.6	19644.6	35185.8	34697	29087.9	36117.5	46397.8	38147.4	30182.4	26912.8	36465.9	34618.3	25156.8
727	426.219	528.016	36674	36933.3	39376.6	37506.6	38627.8	36579.6	39603	16421.5	15531.6	16590.3	17990.1	13741.3	17216.4	17559.3	14549.6	16078.4	34477.3	11000.1	18478.1	236897	9106.68	10962.3	16135.3	13949.2	13754.8	12802.4	90398.6	11560	22895	11217.3	892.338	2471.09	3439.38	1815.02	10656.9	418.496	12761.5	2377.83	3306.65	15947.9	22550.9	3412.41	505.163	1542.42	5930.03	3004.16	1278.42
728	426.357	666.572	117403	119319	120826	121546	121327	120079	120187	139632	163524	153077	133155	294281	215455	187209	189676	272885	1.15794e+06	180513	185238	215729	192503	162203	249360	136122	236278	118539	228788	200271	148436	156409	196544	71823.3	84835.9	64554.3	106239	88472.1	87936.8	95446.8	97671.2	165069	127706	78929.9	82692.5	77642	133516	124365	57466.4
729	427.071	567.913	9730.31	8841.31	8821.5	8858.31	7722.75	8661.14	8143.43	55232.6	50718.4	53486.3	54658.1	50855.1	52436.7	255889	60174.8	53728.1	40214	50765	53922.1	44093	36702.4	47010.7	43338.9	46326.3	48792.4	53273.9	45449.4	47087.6	45360.5	55410.7	45294.5	9141.98	7978.05	8262.01	8194.22	8861.88	8258.73	9082.03	7958.72	8348.16	52975.5	8189.84	7619.67	8616.4	9574.46	8596.81	8864.43
730	427.195	460.945	34736.4	35186.1	35125.7	33647.4	31763.3	33875.2	34084.7	1945.67	1789.47	1707.71	1668.76	1243.26	1632.17	4875.26	1662.14	2250.25	6768.16	2352.53	4624.14	7775.47	1840.38	2326.55	1362.99	1731.96	2401.99	1495.72	6615.52	3012.08	7459.7	2631.75	1123.35	513.967	657.835	1098.55	401.099	338.296	647.486	924.781	995.212	813.359	6265.54	1412.95	361.864	577.112	100.517	466.688	792.394
731	427.359	666.92	32265.6	33376.1	32852.8	33766.3	32790.8	33912.8	34023.3	36768.7	42343.6	42147	35912.7	83719.9	60343.5	52742.3	51417.6	76335.9	324311	49619.1	52859.1	55615.3	48835.2	43664.4	66029	35719.6	65578.6	33013.7	63028.7	54829.8	32393.2	45040	53963	19274.7	22581.9	18043	27409.5	23606.5	22912.5	26462.9	25854.2	45264	27427.1	21718.9	20004.2	21014.4	35933.7	30399.9	13842.5
732	427.272	593.57	55607	57840.1	59037	57255.9	60316.1	56645.1	59682.5	8306.68	10701.8	3956.8	9420.09	10375.8	6858	8904.56	8670.11	10508.1	16589.1	9300.68	78361.4	112525	2488.2	7791.34	7230.66	7185.47	8621.27	9306.52	77438.9	7113.85	85864.9	10097.3	6953.42	15984.2	12276	14974.2	14600.8	13188.8	14800.9	13967	10047.7	12952.5	73139.6	17128.7	13746.2	14623	14037.9	12883.4	12473.4
733	427.27	839.423	72385.4	62556	71959.8	74021.1	76025.4	76713.2	77467.5	192139	282656	99494.9	166194	524008	171789	229499	187562	507848	2.00388e+06	215120	105963	120403	130996	293397	139988	184672	353712	137212	421705	104174	262506	164495	123562	89170.1	64219	69043.8	116817	54204.6	127091	107875	91729.7	126538	219544	132552	112328	106586	120021	105869	71319.5
734	428.256	461.478	7182.27	12957.1	7811.16	12143.5	6885.8	7554.48	17311.1	19755.6	22555.1	13505.2	26451.6	22348.7	17528.5	28159.8	18232.8	27144.4	55111.2	18275.6	48270.6	90439.5	20478.1	21557.6	16369.4	24905.6	21142.8	23225.5	66462.5	26323.9	79418.5	27050.1	14482.4	11067.6	12538.1	9345.93	14096.7	9740.19	16287.4	10339.8	7066.35	7419.97	56262.7	13636.4	4339.26	10616.3	7622.2	11381	5815.23
735	428.373	706.459	791.652	703.923	1343.61	1301.45	1534.68	1309.31	978.113	38210.3	34678	38877.7	35232.9	77252.4	55164.9	30962.6	47317.2	69418.6	429385	41030.2	22070.7	39139.1	54964.5	48052.5	64881.8	39209.5	49964.9	35783.5	49219.7	61813.6	24839.3	35081.6	48431.3	341.955	219.405	430.252	773.796	0	747.574	607.751	227.214	756.592	22441.6	1598.56	596.313	898.127	1048.91	1288.01	729.04
736	428.274	594.024	14874.4	14191	14170.5	15197.6	14191.1	15086	15450.8	990.59	1796	0	993.988	1404.41	976.429	1137.13	422.87	1370.04	1167.34	1070.17	2234.4	5087.09	0	1058.73	886.892	1257.12	1626.71	2066.98	3515.71	1037.21	3093.31	1807.67	890.633	1856.29	1758.79	1910.74	2248.73	2620.31	2378.8	2224.78	1425.02	1301.17	3320.9	2338.51	2171.76	1762.04	1830.8	2051	1813.72
737	428.36	677.264	15087.4	14798.2	14867.7	14852.2	13630.8	13845.1	12760.1	6414.78	6580.44	6777.47	5590.27	13825.5	9560.85	7659.53	8207.05	11318.3	46036.1	7436.83	7760.7	9101.04	6598.68	6638.14	9142.8	6224.72	10766.1	5357.27	11057.9	7223.6	6397.37	7404.96	6494.49	21968.3	35804.3	22958.1	35181.9	37333.5	31636.7	32548.5	41850.3	55568.9	5002.46	35230.8	34416.9	29912.4	29260.3	39494.4	26984.9
738	428.273	839.435	17907.3	16948.2	18965	21283.4	18396.2	20523.3	20927.1	48879.7	72111.8	24958.5	43006.2	130956	44197.4	59752.6	49054.5	124472	499848	56943.6	26508.3	28175.5	33162.1	75810.4	30276.7	44901.6	90547.1	34233.2	104434	27476.7	62737.7	44543.9	30795.4	22033	16680.7	15611.1	29204.4	14802.1	32801.5	28274.4	22756.6	31911.5	56310.5	32134.6	29608.4	26693.2	31634.6	27919.8	18535.7
739	428.731	40.1944	7554.26	7411.58	7849.29	7738.34	8071.27	7747.07	8402.51	10751.2	10377.8	10517.6	10109.8	9867.23	9249.26	11685.7	10593.9	9653.34	15415.7	9462.17	17401.7	16261.2	9411.03	8951.62	10129.4	8045.56	8888.8	8725.38	16170.6	8782.02	15987.4	8417.29	9881.47	8664.49	8115.99	7906.82	8334.24	7824.27	7720.58	7908.4	7579.3	8816.12	14665	7379.51	7861.7	9300.13	7672.84	7384.41	6580.22
740	429.07	568.494	8752.72	9016.24	9793.43	9308.91	8813.23	9284.17	9208.95	35984.1	35496.3	37268	35617.5	34692.2	35466.6	164315	40045.6	37486.9	28626.1	33565.6	35712.2	31485.9	24121.3	32100.5	32764.4	33775.2	32917.7	34072.5	31039.9	32446.5	30660	37676.4	31522.3	8641.43	8577.63	8738.24	9047.88	10056.6	9240.82	9199.94	10116.9	8794.69	34165.4	9594.31	8495.47	8442.65	9002.9	9597.33	9493.88
741	429.248	491.394	48256.9	48871.3	31758.9	49283.9	51285.5	33269.9	49571.6	467.994	775.623	248.463	928.627	1112.26	351.315	1605.45	1328.92	1271.69	4733.51	3387.95	2955.54	4134.33	445.121	641.649	799.757	813.743	719.748	256.036	4932.79	478.305	2218.82	1118.53	564.066	26232.6	24224.1	24875.8	24952.3	27111.5	25208.3	26396.4	26864.5	27266.6	1599.51	27822.1	24440.3	26938.2	26294.1	26107.1	26831.2
742	429.249	536.401	18411.8	17507.1	17228.2	16587.9	17542.9	17560.1	17444	488.434	607.549	376.855	581.1	603.906	678.919	1190.28	716.986	1038.05	3784.94	576.877	2320.11	914.984	130.383	255.573	592.099	348.859	232.844	367.253	3129.94	779.222	2149.1	785.997	561.756	0	876.826	373.02	0	0	334.173	251.878	438.454	343.57	1971.96	212.679	238.522	99.5383	217.53	567.778	348.084
743	429.36	881.621	15221.9	26711.7	35701.6	39600.3	40467.6	42800.1	43175.5	207611	243555	147814	193533	237282	152908	62759.5	59400.1	197138	653765	162892	151224	184759	88662.4	12818.7	108753	180080	213519	116134	165435	149074	181240	134621	137979	24020.8	27098.2	27368.8	29684.1	30585.9	28849.4	36807	29813.2	29354.3	117526	33861.1	31763.6	27656.7	32917.6	28964.3	37682.8
744	430.367	882.144	4054.03	11207.9	14882.4	15697.7	16872.5	18919.4	19184.4	61838.7	72535.3	49031.1	58629.3	70944.4	46966.9	17755	15957.6	57974.1	172873	49163.5	47389.2	44737	28909.9	0	30060	54063.2	64451	36610.2	50150.3	48420.7	55692.2	44247.2	43717.7	18342	20995.2	26416.1	27584.4	24067.2	28146.9	34521.2	19830	28050.9	36822.1	32178.9	27170.1	21223.2	22941.1	11763.3	37482.5
745	430.317	792.253	135050	140410	177300	195024	195544	196662	205240	3077.49	4957.81	5026.97	2027.49	6467.8	7748.34	6948.88	4308.44	7661.75	20260.3	495.144	2313.3	1910.58	0	4382.92	0	4635.54	5360.52	16040.6	9096.89	11057.2	17115	3262.78	2359.95	118121	133440	127351	224438	89208.2	181153	177270	176774	209149	2763.33	265479	222237	194086	222222	185154	97930.6
746	430.914	36.8858	199844	199285	198249	203614	205834	199750	203880	241977	225890	244639	242015	227972	229890	257017	240532	236651	163056	231076	179795	174504	231739	221566	222957	236250	215685	239355	155914	233524	171593	240813	233741	202205	195483	198306	202046	213814	198155	194486	208886	205214	168715	204622	188322	191888	203772	216868	212891
747	431.264	569.974	36762.1	34663.3	35417.6	36127.2	37519.3	34565.4	36419.6	8008.55	6959.46	8643.14	8624.97	7966.23	6937.16	32454.2	8380.09	10337.7	9926.1	3723.35	6405.63	8395.14	2949.12	7739.92	6554.52	6537.78	7271.49	4728.27	10410.7	7440.78	6009.18	7819.56	8362.89	631.595	707.725	125.007	591.787	134.895	365.526	200.759	630.651	122.113	3906.07	0	109.909	357.37	526.527	538.661	221.044
748	431.136	365.813	12279.4	12535.3	12914.7	13191.8	13420.7	13152.3	13265.6	308.23	210.864	200.611	101.64	0	245.332	1467.87	952.121	580.83	25618.2	723.925	1466.21	20188	277.318	552.173	429.24	245.162	639.859	430.415	27455.7	103.344	23873	233.876	122.01	229.99	0	128.442	518.613	128.602	128.131	426.055	238.393	331.583	1592.34	611.947	291.996	300.226	164.289	286.206	0
749	431.349	806.525	39530.6	39001.5	19190.1	23496.1	22414.2	25615.2	24959.8	122853	85494.3	154612	195007	117153	258728	25785.9	38809.2	48375.1	45950.1	72621.9	133609	58665.1	203601	250605	120455	248772	185815	142115	136565	177708	109661	148335	115479	56835.6	43987.3	128166	29989.9	31918.8	21957.7	29584.7	41031.7	18471.6	109651	25530.6	216951	31533.2	192148	22095.9	48088.9
750	431.315	657.404	18085.3	16565.1	18464.6	17736.1	18969.2	20540.2	19940.8	19332.2	25850.6	16059.2	16666	16143.6	23447.4	27999.6	26061.6	32886.3	37310	19552.6	55342.7	64197.1	11699.4	10587.1	14981.9	17744	24340	21208.5	64698.4	17819.8	82703.1	15281.2	15930.4	10454.3	14399.9	13378.5	6127.07	9241.9	11287.9	7416.3	11820.7	11018.2	59637.8	10774.7	8788.49	14261.7	8012.05	12606.2	10190.9
751	431.919	36.7057	14616.1	13973.5	13269.6	14355.7	15010.3	13877.6	12902.1	16342	15871	18505.6	16814.2	16216	15664.5	15671.4	17461.5	15837.8	12266.9	15598.2	12990.3	11926.1	15522.1	15667	14509.3	16855.3	14898.8	15711.2	12188.1	15271.8	13030.2	16238.9	15588.3	14577.5	14515.4	13669.8	13315.7	13637.3	14074.7	13231.5	13689.1	15102.8	12142.6	13466.7	12432.8	13689.2	14986.5	15813.4	13252.2
752	432.24	581.602	159602	152602	160289	159421	161380	156829	159671	417939	319686	355375	333541	334766	331883	482710	390847	421056	1.56693e+06	343953	462073	320524	160943	287414	307398	329867	385960	314595	662336	274629	399170	267363	227682	175888	148320	45973.4	141603	215508	168749	163444	194797	206659	470860	180957	34939.3	166507	35382.1	184711	122591
753	432.306	530.192	160616	155663	159476	162726	158818	157996	158990	60057.6	25102.2	86198.2	21830.7	156537	33423.9	31952.9	34863.8	88228.4	286310	45654.6	76182	105421	49135.7	18366.1	37780.5	12774.5	64130.2	82572.2	443428	15236.3	22196.7	126876	20489.9	199185	175358	184352	151623	116005	125687	188653	104372	186307	135410	190907	113469	134357	169368	239741	156374
754	432.694	40.7834	13478.5	14251.1	12557.3	13963.2	12700.9	13431.3	13489.1	17482.9	14366.4	14471.3	15091.5	14781.7	14000.5	18893.7	15892.7	14915.5	31622.3	14073.5	36083.7	29796	14497.5	14523.6	16977.7	12992.6	13628.5	13659.4	27832.9	14565.7	29834	14447.7	13008.8	14172.5	13229.1	13603.6	13743.9	13454.6	13072.8	13108.2	12863.9	12864.5	28622.5	13109.5	12338	16416.2	12637	12655.6	11777.3
755	433.243	582.006	43786.1	41769.4	40253.9	41066.7	40989.1	41126.1	44565	111176	88469	92542	90297.8	89854.8	87827.2	123605	96498.2	106057	411448	90106.1	121104	86016.1	43506.4	75858.6	81349	89523.5	100586	84980.4	175045	70843.2	107567	74306.3	57686.3	44300.1	38647.9	12216.2	38176.9	57415	45117.8	45246.3	50703.9	55519	125069	47590.2	8643.68	42665.9	9778.21	49680.5	33115.9
756	433.274	530.268	44621.3	43629.8	44437	43322.9	43594.7	43511.9	43617	17384.3	8057.56	25996.1	8119.6	47012.7	9825.6	11678.3	10157.2	27984.5	79463.1	13954.9	23539.5	30009	12542.5	6248.99	11722.5	5117.94	17719.1	25206.5	129832	5160.68	8615.74	37579	6334.97	55668	49045.1	51665.6	41529.3	32328	33036.3	49976.3	28161	50607	38276.5	52815.3	29393.5	35334.7	47135.6	62158.5	41639.7
757	434.278	549.083	58243.9	56968.5	56256.7	55549	57122.4	57242.2	56013.6	2762.67	3643.79	2061.28	3256.58	4863.56	2447.81	3038.52	2423.79	4908.22	11154.7	3575.13	7245.64	9934.2	531.491	2096.75	2291.55	2421.14	2869.32	2364.87	10838.1	3238.53	7937.53	2915.8	2504.81	9438.86	9028.86	10499.2	1092.33	340.191	1277.1	9531.23	331.89	1143.24	9137.19	1117.08	656.497	998.551	1003.41	12783.7	898.354
758	434.321	604.762	10359.1	11313.4	19711.1	23427.1	20473.1	21475.1	23358.2	67823.2	75440	42105.7	59776.7	78769.3	48846.8	70827.1	66289.9	80794.6	187506	61187.9	146255	208339	44739.3	52560.5	60027.2	53798.7	62373.6	67530.2	139518	51960.6	151930	58383.2	56819.4	16585.8	11018.7	17940.8	16193.3	15031.6	14836.3	15151.8	12421.6	14268.7	133537	20969.6	13957.3	17893	16721.8	14084.3	15992.3
759	435.282	549.046	14580.2	15902.8	15021.5	15535.3	15617.8	15111.2	13988.7	807.105	1281.9	1161.34	1468.19	1352.95	1358.33	1675.26	1301.29	2335.12	4943.86	1695.86	3274.01	2750.14	0	1393.01	1801.92	568.462	915.895	1132.05	5210.29	1098.5	2448.95	1818.26	1001.86	2542.85	1512.26	899.944	1719.29	1202.33	1711.39	901.615	1205.69	2074.18	2534.7	961.565	1361.57	1045.45	1421.16	895.338	999.299
760	435.275	794.427	13451.7	8653.83	11930.9	14432.6	14422.4	16628.6	16979	6529.3	7652.07	3209.4	2621.79	8515.61	3708.96	9264.85	9043.68	15388.8	24681.5	10447.9	5908.93	5954.25	0	5662.82	0	5831.94	9087.99	5553.43	14719.7	3605	6237.84	934.64	516.9	2934.6	3411.1	3099.81	4002.51	1717.35	3552.72	1117.48	1385.16	1653.61	5441.5	2871.23	2900.19	2171.38	5908.33	4570.85	2438.96
761	437.194	582.199	185043	182683	190129	188974	197009	203561	198796	619168	560729	619900	660960	594379	577497	696973	765461	781589	1.33853e+06	577193	682957	669228	236104	546755	537151	555636	619133	553507	1.00575e+06	527579	752484	490967	526848	216940	201446	68457.7	194228	254517	212662	217341	231845	244251	681711	232586	53226.9	213370	78453.9	243525	172661
762	437.287	766.977	6250.31	6637.59	13916.8	16409.2	17175.2	18719.2	19954.1	8997.96	19875.2	1088.08	8963.36	19483	8161.44	16995.4	18091.3	28988.2	123112	6950.43	794.223	1958.03	0	11851.3	0	1047.33	11625.4	592.151	21137.3	815.065	7783.77	690.565	0	755.206	1404.2	1337.77	1039.58	460.399	643.938	379.505	434.558	966.258	10184.5	708.835	1338.47	502.367	1830.62	1845.31	608.15
763	438.197	582.249	51747.3	50574	51558.1	53424.1	50690.1	50707.1	53154.6	159220	145315	158256	171728	153760	150423	183574	200916	205694	352983	156500	179639	170484	60265.4	142235	138498	143579	165723	146208	264656	135399	198205	127655	138199	57474.6	52003.5	16899.2	53451.1	66358.7	57816.6	58086.5	60136.9	62701.5	173387	62857.9	13907.2	58570.5	14742.4	62650.5	46048.2
764	438.299	659.985	28362.1	29289.7	28107.2	28666.3	32385.6	29435.6	30274.2	532985	335727	302458	366250	254988	400210	358996	558624	761513	565441	435471	77857.2	50365.1	179599	430684	231939	348583	396677	410872	222410	820100	39463.2	240314	372506	82787.6	84721.7	67237.7	97104	112247	123222	116398	104550	95904.8	63775.3	81609	132567	114945	83229.1	81563.4	82282
765	438.379	785.131	73560	78343.7	84916.7	85003.3	84943.3	86027.5	85360.9	97431.2	96429.1	94881.2	92467	88788.2	91622.6	153712	106878	97758.1	163084	86555.8	93385.6	76795.5	61534.3	81659.7	52608.3	84689.8	88300.6	90114	102153	85158.6	80986.7	86910.5	78311	79968.2	91901.5	118375	76428.1	71963.9	70103.5	74280.6	70371.3	68438	84878.9	72952.1	100834	72249	137352	70804.3	75957.6
766	439.231	548.174	121247	121157	114902	122556	123655	117832	118370	1827.18	2174.68	1390.1	1679.33	2734.43	2110.67	2532.03	2677.2	4396.78	8333.31	2251.15	7158.34	8897.18	515.716	2883.58	1968.3	1989.47	2965.51	2667.66	8940.71	2120.32	8159.42	2247.42	1716.16	2266.14	2533.25	2091.08	1536.69	1123.35	2275.17	1097.72	559.851	1716.4	5081.31	1606.53	269.06	1263.4	1355.58	1687.5	1618.15
767	439.301	660.019	7988.71	6336.34	6599.98	7295.54	9277.04	7771.21	8630.62	123764	77909.3	68271.2	84872.1	57032.8	89538.1	84358.8	130985	169855	128347	100735	22402.9	15109.2	40319.2	100317	55790.6	79468.4	90850.6	98093.9	53748.4	184789	11944.1	58264.6	87480.7	18784.7	19922.2	17057.4	23847.9	29831.5	29469.3	31793.6	26033.3	23584.1	19289.1	18197.6	33959	28167.4	21059.9	20915.1	20313.5
768	439.381	785.125	23297.7	24368.6	24887.9	26660.2	24644.9	25734.4	25478.6	25679.3	27802.5	23431.3	23495.6	24259	22840.9	41998.7	31590.4	30057.8	49900.3	23230	22083.7	21708.2	7386.53	23829.1	0	23416.8	24334.4	23727.9	30303.1	21277	23186.6	23335.5	19815.4	23639.2	27119	33738.4	22368.9	21501.2	19690	21759.5	20814	20641.3	21522.8	20961.5	28861.2	20081.4	40311.4	22452.8	21293.6
769	439.283	858.602	17326.5	15027.8	19773.7	19077.6	18790	17498.6	18665.4	61442.8	81613.2	29763.8	54097.5	132795	48157.5	62744.5	54960.5	134269	515635	61987.9	28481.1	40689.8	27858.6	51146.7	42818.3	53242.9	81085.8	44467.4	93753	28617.8	65253.1	39787.4	36767.9	19432.8	14957.4	15991.9	23504.2	4317.32	25658.1	19846.9	18993	26055.5	54307.1	24498.7	23823.7	21260.9	26446.8	25098.3	16064.5
770	440.314	655.924	4802.46	5851.4	6869.36	5224.37	7019.05	6263.33	5562.68	102669	66706.6	61419.7	56612.8	50630.2	48269	93291.9	91750.2	137426	206859	76331	45857.4	9743.68	43298.8	94221.4	39509.8	47171.4	48368.1	61383.6	48676.7	142188	22665.4	35362.2	67096.1	12835.2	12420.6	14537	11493.2	16517.8	17238	18332.6	22220.6	21869	38822.7	13364.8	16336.7	31394.9	16748.5	12087.7	12206.8
771	440.234	548.196	27205.1	28349.5	29276.5	28372.1	27275.2	27321.8	28367.2	485.29	1228.84	610.72	545.879	1032.25	768.687	1474.03	1219.98	1981.47	5045.07	1504.21	2565.43	2413.26	463.245	1572.05	932.641	541.143	1201.67	418.904	3473.05	2581.01	2243.19	508.294	431.344	779.178	389.998	464.424	404.745	215.775	628.836	361.491	226.202	442.613	2781.46	364.724	127.304	122.266	379.314	358.238	11105.2
772	441.329	638.664	35288.1	35645.6	32643.1	34445.5	35236.4	36480.2	34421.3	73664.2	93036.9	41908.7	65825.6	86025.5	54306.5	70000.8	79150.8	114243	155867	76023.3	202119	281005	51950.7	74170	60867.2	46250.1	57284.7	73591.7	178899	83463.2	200725	68750	72890.2	31774	29319.3	35874	32488.9	30657.9	35448	32361.8	26614.6	34339.8	177616	41824.6	34186.9	36527.6	34179.2	32148.4	31211.9
773	441.213	480.723	34274.4	37229.8	37628.3	37521.8	39326.1	35931.5	35671.3	7104.65	6793.26	6647.63	6433.25	6205.3	5747.89	5514.31	5351.64	6405.04	6287.84	4983.64	7181.29	7164.12	3348.59	4587.66	4748.45	5143.91	5156.13	4169.91	6691.12	5378.52	6947.92	6777.67	5695.07	1339.42	216.219	881.953	535.857	654.954	1063.54	652.058	842.518	454.451	6335.38	381.159	880.687	986.119	498.073	1370.79	1287.22
774	442.325	500.067	14369.9	14051.3	14628.8	15072.1	14427.3	14247.3	13885.8	25930.7	28620.2	15129.2	27347	30047	23245	30976.3	23681	34988.5	64493.6	25372.1	57275.4	103112	23563.4	27560.5	19677.2	29930.1	27909.9	26224.5	75107.8	31456.8	89180	33007	18392.7	13631.2	13903.2	12883.3	13751.5	12125.5	18096.7	12652	10998.7	15035.1	65869.2	15107.8	9881.91	12736.8	12867.8	13604.9	11389.4
775	443.265	508.564	100577	102591	100321	102892	103178	101381	105746	4145.3	5023.74	2164.59	5496.72	4674.8	3877.45	5245.12	3292.84	5707.54	9063.39	4474.81	12363	23505.1	3237.39	4518.98	3225.81	3657.35	3713.98	3853.88	16476.3	4428.25	16625.5	5918.23	3360.26	3609.64	3583.8	2424.79	3681.89	1776.99	3875.29	3654.12	2484.49	3298.44	12889.9	3608.44	1362.87	2283.03	2694.09	3239.1	1817.83
776	444.097	567.673	9871.37	9526.08	10014.4	11309.4	10100.9	9394.77	10307.1	78902.1	71129.2	72526.9	71024.2	72393.5	71308.2	366837	79859.6	74913.9	56403.2	68365	70889.3	60084.2	48696.9	64905.5	60767.9	66632.1	67394.4	68544.1	60642.9	64489.8	64017.3	76645	63114.3	9507.38	11012.8	10264.3	9495.7	9718.91	10752.4	9789.15	9647.52	10481.2	68600.9	10464.9	9356.23	10711.6	9449.12	10437.3	10084.8
777	444.311	365.159	14986.3	14488.1	16055.6	15382.2	14877	14572.6	14210.5	23361	27754.6	15886.8	29110.7	29320.2	19820.6	35330.9	21712.8	32615.9	66662.9	22843.3	53033.2	105721	22403.4	23758.6	18865.4	28865.3	26688.1	23842.6	82478.5	30115.6	92593.3	32234.8	14156.9	16789.5	17071.1	13953.5	17940.8	13008	22703	13475.5	11010.3	14135.1	63597.2	17936.2	9649.52	15169.4	13402.5	12985.5	12459.2
778	444.268	508.805	29250.9	26299.7	29114.4	27657.1	27448.7	27280.9	29603.8	589.034	281.224	512.198	285.06	322.871	217.491	105.134	422.707	380.029	1484.31	360.549	1849.48	3433.63	446.719	311.028	121.251	376.106	350.458	0	1757.05	105.839	2218.21	107.056	363.605	960.303	907.945	297.772	369.923	822.044	1420.49	1178.97	474.418	648.282	960.548	449.614	787.628	623.888	888.72	961.291	1068.59
779	445.28	593.931	174545	175198	170613	170500	175537	170828	180936	1012.28	890.207	346.481	592.304	951.735	723.092	1017.99	781.714	529.023	1207.96	359.13	2552.6	3171.32	0	897.078	444.867	111.937	1132.84	274.947	2739.61	816.654	2314.06	502.582	730.66	580.272	841.818	731.246	719.14	830.916	6529.9	8841.1	509.891	691.095	1725.51	583.227	546.076	400.183	723.124	319.485	113.453
780	446.271	589.958	74200	73979	74741.1	74348.9	71506.9	74715.2	77551.4	77519.6	59483.4	65953.9	61163.7	62989.7	60379.3	80955.7	76460.5	69691.6	116724	51755.7	77941.2	43094.7	16336.2	44070.7	46035.7	53139.9	58700.8	53167.8	65336.3	40957.7	51473.6	56831.3	36757.3	33281.4	31370.5	14370.2	28857.5	36842.3	33478.9	35110.8	35120	37738.8	72110.3	34283.8	11547.8	33513.1	11193.2	35179.7	27200.5
781	446.349	863.73	4154.95	4253.22	5746.08	4536.72	5322.96	5020.47	5093.64	37152.8	51524.2	20295.3	35242.8	88563.9	34908.3	37933.8	34640.5	77418.1	344341	42719.1	15612.4	25799.8	25582	7738.69	28448.3	43870.3	59632.7	26485.9	54318.8	24253	32413.9	27000.4	24704.6	4593.72	3322.54	3172.22	5047.37	3072.98	4720.08	5474.35	3562.58	4679.99	41864.3	5583.6	5472.7	6057.27	5009.55	4959.49	3731.88
782	446.887	37.1181	20450.8	19850.9	22102.1	23409.6	21498.6	21473.9	22947.7	19578.4	19359.8	20540.7	17871.2	19306.4	20530.1	18933.3	16486.8	16667.3	14180.1	21595.7	12492.6	11548.9	18828.4	19257.3	17395.8	22020.1	18309.9	20060	12866.8	18753.5	13917.9	17037.7	23089	20485.8	20307.1	22032.4	21016.9	20453	22177.4	22122.9	25092.6	21827.7	12729.9	21067.6	23940.5	18269.5	21893.7	21874.6	23842.9
783	447.258	492.044	10677.6	11473.3	10967.7	11096.3	10967.3	10012.2	11835.5	1165.73	1141.53	693.322	1173.45	1490.93	550.151	2077.81	1229.8	1700.01	3568.87	1208.29	3386.4	6175.7	376.291	577.393	563.23	703.304	546.263	745.219	3896.84	1345.49	4690.37	1340.56	839.804	10435.4	10889.2	10451.8	10278.5	10757.9	11103.9	11052.5	11214.9	9516.38	3875.98	10841.5	9618.52	10781.4	11905	11494.8	11562
784	447.273	586.65	17942.4	17398.5	17628.8	17485.3	17266.3	16427.1	18029.5	25940.1	20887.6	20373.8	20500	19964.9	19877.7	25936.5	24624.4	26691.4	35114.1	17953.4	27724.7	23031.1	4485.41	16017.4	14563.9	18122	18654.2	17645.5	29056.4	12796.9	22359.2	17999.3	13399.8	9737.11	9102.89	4565.86	9179.52	10775.9	10294.4	11390.1	11319	11259.7	27924.4	11298.2	3978.46	10644.1	2894.69	9744.4	8075.31
785	448.338	676.856	32562.8	31529.8	33548.4	34138.4	34477.4	34250.4	35371.8	70197.9	106222	40501	81701.5	108569	69695.5	67182.2	80984.8	115933	165072	81705.5	197333	280762	52399.6	74935.3	75459.2	55603.5	62570.8	89757.4	192839	72898.6	191735	79773.5	77252.8	35526.4	28423.8	33160.9	32173.1	29182.2	32254.9	31498.6	26378.7	32402.5	173923	41436	35802.6	37171.7	33630.8	32413.8	31702.6
786	449.053	568.307	15146.5	14737.9	14741.5	15739.6	14736.2	16139.4	16108	145431	150117	147886	147196	149366	151771	355862	165753	151942	73677.6	144359	140724	121000	41687.4	125173	124571	129583	137327	138639	113253	131709	130963	151231	124161	14635.3	14508.6	14678.7	15646.6	16212	16272.9	17532.9	16930.6	16822.5	132956	16570.6	16223.8	15910.5	17132.7	18567	16556.3
787	450.314	455.142	5161.37	10549.7	4070.6	5400.04	4863.72	5253.82	5181.7	14811.4	16183	8458.58	17830.9	21522.7	13108	19151	13512.9	19485.2	38234.7	17013.5	50738.9	52848.1	14161.9	19364.4	11937.4	20141.9	18089.7	16450.1	55527.5	18634.8	50204.9	19995.6	10527.9	7834.32	7258.83	7712.58	8521.4	1892.5	10040.4	6674.99	1912.65	6543.62	44786.2	11055.7	1233.54	7419.85	7508.63	6162.53	6615.89
788	451.051	568.308	16365.2	15996.4	16835.4	16786.6	16909.5	17093.7	17787	95696.7	97702.5	100152	96552.9	99614.3	101435	240173	113479	100280	50807.3	96022.2	96714.2	82631.6	27840.1	83973	83737.9	86957.9	90173.4	97185.1	74765	88684.4	90109.4	102236	84069.3	16768.8	17552.3	19101.3	17563.4	18277.6	17608.8	17998.5	17712.6	17241.3	90174.5	18087.4	21613.1	16832.9	17775.2	18080.9	19739.6
789	451.308	860.102	3583.83	3956.7	8054.11	8260.34	9734.48	11338.4	11460.7	26330.7	43363.6	14133.9	30263.6	72564.2	23476.5	50409	52766.8	115915	344261	25954.9	11282.2	19120.9	8049.12	462.765	11337.5	22276.1	39394.8	15051.5	26254	12786.4	25450.2	18876.4	16869.9	8863.13	5721.97	6092.09	13155.9	2823.57	9739.92	8909.43	10661.5	9652.35	31913.7	10938.9	10429.6	12582.4	12516.2	13613.3	8663.89
790	452.054	568.276	2306.9	3706.34	3731.67	2658.26	2740.19	2666.67	3622.69	20710.8	21860	23580.6	21120.1	23185.3	24753.9	49998.2	24430.9	22941.9	10554.6	22111	22444.9	18364.1	5097.29	19492.2	17246.7	19010	18634.8	20462.2	17124.1	17829.6	19338.6	22226.8	17183.3	3654.89	3764.74	3997.15	3868.6	4136	3826.55	3903.84	4316.36	3859.86	20947.3	4501.89	3829.9	4515.78	3977.82	4022.72	4630.16
791	452.316	692.004	3994.03	4480.77	3523.69	5219.2	3758.62	5309.14	3977.43	49490.9	54457.1	21250.7	32459.3	38692.7	60446.6	68864.4	77777.1	171332	146246	81428.1	16571.1	20306.7	20582.7	110550	29659.9	43514.2	61408	50102.4	55054.3	175371	16448.5	30359.4	80974.1	12274.5	14445.3	9808.16	13646.2	19651.5	10039.5	11140.7	18921.5	11692.4	18188.4	7744.88	10538.7	16288	11916.1	9111.7	9267.29
792	452.394	824.547	42496.6	56933.4	63930.5	65567.6	67192.6	66380.2	67657.7	82166	111526	75700.4	76805.8	77943.2	72808.7	120500	84292	86894	147364	72383	65494.3	44477.8	52099.8	66315.7	65587.7	90147.2	70318.7	64950	89933	67130.2	62789.4	67280.5	62240.5	52339.5	49226.2	53944.8	46586.9	48201	45129.4	46150.4	45559.9	44249.7	65286.9	42453.3	59736.6	49199.6	65061.9	49997.2	46947.9
793	453.191	579.384	72837.3	72846	71405	73020.7	73942.7	73331.7	73871.4	100569	87640.5	100218	95121.2	85419.7	87229	99342.3	105549	103426	182966	81484.5	95050	76717.4	32625.6	79377.4	77921	86567.2	90954.1	81297.9	115488	71408	86950.3	79184.5	69918.5	53423.5	49505	20659.9	46406.1	60454.7	49667.2	55036.7	57458.5	58215.2	94885.9	55401.1	14535.7	51760.4	18084	55841.1	45634.8
794	453.27	632.613	14829.5	16135	17979.2	19169.7	17704.8	18061.9	18440.7	3252.35	1177.82	3658.42	1227.85	2788.87	4845.53	1860.72	2377.82	1427.62	0	1773.11	5604.35	4753.91	0	14188.6	11348.8	11973.5	11416.9	7539.63	7304.34	5519.68	5988.23	3374.87	4871.52	629.26	372.914	537.035	394.189	611.043	185.58	720.375	428.131	639.647	5874.83	773.418	265.332	363.123	795.531	320.849	561.329
795	453.342	309.281	2019.38	2093.27	2192.53	2325.12	1907.58	1737.29	1780.46	32724.7	36814.4	29390.2	31326.9	34914.8	32602.4	170988	33390.6	34429.2	32050.6	31045	64426.2	34698.6	31619.2	33451.8	31687.7	30337.9	32527.8	33756.3	36407.4	31351	34568.4	32225.9	32345.7	1824.64	2056.15	2384.07	2991.18	1280.48	3484.14	1653.21	1997.75	1146.89	36635.4	2067.54	3104.65	2268.24	2056.03	1582.42	1589.38
796	453.396	820.698	15895	17501.9	18032.7	20457.2	20428.6	21257.3	21626.8	26838.1	35837.8	22991.8	22961	25395.9	22449.4	38187.2	30757.5	32147.5	52793.3	22553	22633.8	15785.1	13697.2	22030.9	7786.14	29102.5	21958.9	20881.8	29572.5	20354.7	19236.4	21056.9	18526.1	14760.8	15396.2	17079.2	13810.1	12693.6	13220.8	13611.7	13458.4	13927	21324.6	12850.4	18373.8	15621.2	18255.6	14825.1	15881.9
797	454.293	637.204	52015.8	48745.5	47310.7	48735.9	49092.4	46930.2	48646.7	137608	144617	189929	206942	159617	199526	135829	142753	171013	828437	305879	65490	72492.4	129912	143163	241736	186504	225052	256359	113655	126819	80020.4	158647	178445	147989	133257	116346	94220.3	139419	104004	100535	95866.2	122706	69912.2	85712.1	110658	101768	114411	84829.9	96967.5
798	454.225	579.994	19416.2	19775	20636.2	22189.7	18026.5	20541.3	20277.8	33429.3	32854.3	26219.5	27155.8	27936.6	21728	69980.2	35629.9	71576	87328.3	50990.6	42564.7	25981.8	16243.3	39048.8	19697.8	20899.1	31175.5	19965.8	43821.6	50271.9	25299.6	26189.9	20027.2	15538.3	13456.1	8177.62	13268.6	16786.1	12035	13288.2	15436.5	14915.8	36634.8	14374.1	6879.42	13327.2	5929.35	15362.8	12382.5
799	455.225	470.596	50190.7	51604.2	50185.9	51853.4	48636.7	48056.3	52304.7	439.951	534.808	104.249	470.278	1342.06	0	4436.42	1101.45	931.481	1361.18	1246.11	1487.57	1509.4	236.968	826.804	1546.62	807.858	577.056	538.156	4139.27	771.984	1498.09	965.893	937.844	1884.93	3367.52	2264.55	3725.05	1377.7	2777.04	3281.34	1214.85	1244.24	2179.41	2448.88	3392.74	1766.7	3331.17	2002.01	1872.89
800	455.301	637.492	14768.6	14034.3	13263.5	14877	14432.8	13053.3	15697.4	34452.8	40565.7	42151.5	45775.9	39863.2	46073.9	34603.5	37128.7	40601.6	194889	70804.5	37707.2	51024.6	29167.7	35748.5	56356.3	44759.7	52098.3	58789.8	48412.8	34081.5	44140.1	41017.3	42213.2	34090.5	26845.6	26401	21855.5	32402.1	24664.1	22276.4	21532.2	25710.9	35844.3	20828.8	25800	22926.7	25544.6	20888.2	20527.8
801	455.346	723.475	19894.3	19296.7	21137.4	21938.6	22915.7	23380	22102	29459.4	56126.3	12367.3	36958.8	49152.6	31597.1	28386.5	35132.2	49738.6	66568.7	36213.8	108162	155132	13978.9	33994.6	33863.2	22519.1	28458.7	40614.1	108314	34814	101580	36877.6	38853.6	21736.7	18227.7	20195.2	19237	18526.9	21826.8	17956.1	16285	18862.8	94178.9	22770.4	21736.1	21506.5	23336.3	19210.3	18888.1
802	455.34	808.8	42303.6	28826.1	35135.1	37225.4	36782.4	38736.2	37630	8905.98	21444.5	6898.41	6650.75	13552.8	6036.23	16074.5	15961.7	27287.8	25271.8	6074.94	9205.08	1884.09	1157.76	5675.18	0	13201.6	9782.66	6802.6	20765.3	6527.4	10262.6	7819.86	5264.13	4683.25	6051.37	6123.94	8474.13	3089.91	9603.06	3493.44	2838.02	5788.06	9934.27	6038.47	5700.53	5611.41	12987.8	9656.46	4012.86
803	456.35	539.284	15297.7	14030.9	15238.3	14984.9	14628.4	10041.9	16577.9	27434	39791.9	17989.5	29179.6	39798.3	33308.7	29091.6	51451.8	44951.3	82966.5	30317.2	85234.6	115425	24096.5	33022.4	28071.2	30239.6	40493.5	28883.5	91353.8	39474.3	125740	33613.9	17765	15253.3	9075.47	12721.6	16524.3	12705.9	13513.8	12672.4	10193.8	9673.65	78692.9	17585.5	9460.95	13566.7	12782.9	8053.26	12856.7
804	456.335	598.714	28311.8	31316	25866.4	29491.3	31336.9	4016.34	31018.1	63410	102985	37915.1	80901	107522	70088.2	67145.9	71591.4	111896	182498	90051.5	200512	299641	62626.8	75911.9	77801.8	59661.5	66430.3	87618.6	198609	75325.7	204719	83519.5	81000.8	22734.2	3849.47	25261.9	19907.9	24664.4	4355.92	24889.8	18939.8	5696.56	186135	34433.9	3768.5	20805.6	25958.7	4535.19	19699.7
805	457.28	579.312	36447.1	37762.1	36388.7	37412.1	38913.5	36574.2	38150.6	10824.8	17615.5	1350.78	12675.4	18259.7	11937.9	2797.41	11344.5	17153.6	27231.2	13621.6	33360.8	47213.9	0	12574.3	12652.6	2628.22	10815.1	14473.7	31716	12299.1	35561.5	12745.6	12600.4	547.683	556.429	141.56	978.943	415.881	737.108	569.334	726.461	297.188	31134.1	365.703	1262.7	572.704	113.818	453.383	455.978
806	458.328	388.796	11853.7	12115	12477.6	12000.3	12069.3	12195	12861.5	22864.5	27012	14269.4	25369.5	29160.2	17163.6	30191.9	22681.2	32573.4	59916.1	22438	50294.8	95206.1	20613.5	22992.5	16986.7	27149.2	25222.2	22177.1	79904.1	25689.2	85950.6	28386	14657.5	14867.8	13816.1	11850.4	16668.7	11226.1	18653	11470.6	10034.8	13299.6	62261.4	15045.6	8741.25	13910.8	12685.4	12328.2	10804.8
807	459.278	684.187	8912.65	7950.31	7495.51	6832.68	7832.1	6828.08	7949.96	62479.4	81422.1	44163.9	38080.1	54808.4	49892.6	64679.9	79921.6	98708.1	156291	55271.5	98095.5	55572.3	19571.3	64671.7	76304.2	47534.8	47103	69932.4	89068.4	64409.7	94748.1	54837.7	30251.8	3216.58	2660.98	3154.64	2882.72	3101.5	3102.95	3516.94	3431.14	4353.74	95393.4	4672.96	3181.38	3007.2	3673.79	4243.42	3338.9
808	459.34	789.497	12083.1	11105.2	14993	15016.4	17097.6	17568.8	17613.4	14426	34766.5	4354.41	15529.4	51897.6	15705.7	27233.6	24678.5	65358.1	158933	20125.2	5735.95	8478.42	7384.37	33712.9	0	13784.4	35837.5	15269.6	34845.3	6504.51	17708.7	13618.6	10614.8	4082.09	4143.33	5101.26	5164.21	4097.52	4674.31	3270.49	2188.91	3993.12	16420	5111.38	4043.73	4384.9	6077.1	5472.87	2750.27
809	460.27	579.971	940553	953753	952482	950837	936115	929987	949921	11222.9	7668.23	9551.27	7796.32	7898.78	8493.62	14836.9	9742.16	9001.84	14732.6	6738.37	11466.2	7567.83	960.213	5233.5	5213.08	6167.37	7549.92	6462.27	10661.7	6075.24	9322.47	8112.47	5664.22	1.04055e+06	936648	369726	898600	1.16215e+06	963026	1.01711e+06	1.09762e+06	1.12245e+06	10579.6	1.07738e+06	272354	973350	295500	1.08106e+06	846392
810	461.273	579.627	262469	265409	262925	259931	261603	260650	265593	3944.99	3525.18	2441.11	3054.64	2937.45	2718.07	5309.78	2974.72	3723.59	3316.43	2507.76	6061.85	5619.57	0	1756.94	2921.7	2862.76	2485.65	3200.03	5611.71	1412.65	4790.66	2967.76	2210.76	282243	257702	105718	254162	312272	270934	279241	301104	308695	4038.77	299190	81186	266468	80084.5	295610	232363
811	461.837	669.861	11782.1	11925.3	13033.7	11596.2	12141	12418.8	12104.1	13155	22161	6814.48	14259.7	21739.4	15541.6	12377.2	14981.4	22166.2	29199.7	19517.6	54420.5	73894.3	4252.93	16097.1	15626.1	11913.7	11834.1	20676.4	46735.2	15893	52847.1	16626.4	16331.1	10404.8	10439.1	11582.6	10754	9940.88	12706.2	10705.8	7997.31	11443.5	47154.1	13664	13194.8	13073.5	10794.8	10514.1	9918.55
812	462.307	595.886	111193	111003	108942	108910	105943	108291	107718	2558.49	2618.43	826.839	1855.33	3693.19	4122.56	3191.2	2775.57	3497.51	16116.1	3649.09	8611.31	13400.6	0	3260.81	2847.85	3043.65	1748.11	3074.41	7809.28	2119.37	8582.86	2756.75	2327.91	51459.6	47729.3	20326.3	44307.2	56823.8	46590.5	51765.4	54435.9	56400.6	5898.96	54563.7	14684.1	49608.3	15183.6	55370.8	41703.4
813	463.023	36.3626	8409.16	8141.71	8468.65	8628	9418.36	8207.06	8748.54	9975.85	11698.1	12590.4	11732.2	12566.7	8480.43	16186.8	14094.3	16744.6	12280.6	12947.1	15062.6	16554.1	10875.1	10029	9843.42	10528	17276.5	12850.1	21184.7	12758	15963.2	11482.3	7922.6	7558.89	9329.04	6875.98	8727.7	6790.39	10243.7	8823.93	7456.91	7861.67	17520.7	7030.75	9584.61	6782.24	7687.66	8175.5	9650.66
814	463.344	632.917	46358	48009.2	48541.8	50066.4	50310.7	47137.7	46861.3	93557.6	142175	51002.3	108202	146282	88896.5	86652	108072	155438	258254	121349	312146	453693	84913.5	104929	110502	79562.6	88291	125074	281872	94924.6	311519	106293	111228	43324.8	32981	43951.2	36833.7	39002.6	42984.6	41016.6	32826.4	43184	280949	53958	43014.1	42753.1	42901.7	38780.7	34229.5
815	464.314	678.705	38102.7	37074.7	38766.5	39781.5	39435.8	40425.4	40598.9	365133	369736	197093	260798	221368	329227	221010	492381	651040	764104	328395	45217.8	43773.4	181648	333400	178695	240052	281437	285651	227630	575162	26008.7	196820	309288	63223.8	50598.6	45834.1	70811.6	76854	77071.2	76180.7	54238	74978.5	52595.4	54734.8	78264.5	92906.4	48887.1	59236.5	51372.9
816	465.207	369.49	11641.5	11308.4	10954.7	11061	11204	9881.08	9514.61	228.646	0	0	111.09	221.906	0	493.749	0	135.682	0	102.378	843.951	703.033	279.694	235.137	221.134	0	0	509.42	270.836	244.562	431.07	0	0	471.6	531.844	459.252	468.762	99.8114	416.588	378.318	0	221.898	0	261.632	221.048	117.229	518.007	266.797	372.741
817	465.32	678.287	12691.5	12697.3	15089.5	14396.1	12821.6	12663.2	14681.9	100440	97554.1	55865.2	73049.9	66955.5	88683.8	61459.8	130162	166188	198565	86713.1	34730.9	35961.1	43371.3	84322.1	52876.7	66477	79953.9	78826.7	82319.8	153558	51609.6	56448.3	80363.5	19506	17926.4	13578	21488.4	22742.2	20676.6	21787.2	17508	21968	39155.6	16071.3	23569.6	25996.2	17793.1	18437.1	14972.1
818	465.358	757.968	16447.6	24410.7	26310.2	28404.3	28216.7	28311.4	28287	23300.9	22055	20801.6	20541.8	40355.2	14888.8	25728.6	49623.9	62131	134949	39015.4	52111.6	60706.2	0	20242.4	819.375	18160.8	59542.5	24646.8	97193.9	23842.6	54898.1	24530.3	7653.15	20510.2	30084.8	27377.4	20673	13662.6	25163.7	9587.97	15601.5	11256.1	41493.1	13602.9	16833.4	17618.3	31001.3	31206.9	14330.9
819	466.33	736.922	24042.8	24747.2	26166.4	27840.5	29382.3	28256	28472.8	572171	574216	313763	472392	335257	559525	417689	937999	1.24847e+06	1.56525e+06	522655	78892.7	53128.5	242238	554339	251061	467079	452406	481224	306902	1.12256e+06	43612.9	322098	590367	105520	99497.1	78877.6	129767	141086	109600	139587	137112	116639	77679.2	74836.1	135643	125251	103247	111402	86156.9
820	467.333	737.155	9943.19	10989.5	11174.1	10745.2	11905.9	12144.7	12084.7	147833	147976	75716.2	120145	90474	144618	108271	230710	311092	389665	132998	21944	10948.2	55702.9	143874	60293.9	117744	117742	124423	82589.9	285714	17745.4	83807.2	145709	28982.9	27973.9	22299.8	37153.3	36762	29944.6	37887	38229.4	33063.4	17508.1	22271.3	39103.1	34102.2	29620.5	30311.6	22728.4
821	467.262	593.967	118693	117610	116175	113083	106725	105383	107916	1130.58	1498.9	950.908	325.832	834.211	502.263	2978.46	1035.01	2612.23	2276.2	3034.27	4790.05	3151.97	0	1497.11	1581.9	1270.04	1741.46	2596.77	4603.3	2390.49	3549.36	495.893	863.625	273.969	264.263	239.627	349.235	217.204	356.325	156.952	676.993	267.296	2619.47	222.284	261.965	1234.26	103.72	287.955	439.395
822	467.372	774.061	24351.9	12953.1	15728.5	16298.8	17115.3	21654.4	17818.2	16349.6	20348.4	14447.4	20052.6	31877.1	14021.9	21027.9	38493.4	57267.1	93360.3	30590.3	33125.9	46163.9	0	16245.1	0	14376.5	38770.2	17421.4	65497.3	17605.2	34752.5	16888.8	6755.42	14521.2	15977.9	20649.2	12831	10261.4	19970.4	7164.34	10386.1	10421.4	26913.1	11079.2	10938.7	13149.9	23024.5	23149	9589.72
823	468.309	574.55	137109	142173	133670	138628	137485	135309	136366	335591	261887	362180	512699	485816	143153	470980	288191	597588	1.63801e+06	536566	121168	254965	234516	253692	497032	351541	318280	463933	278670	294549	227283	291972	152298	201936	144830	169320	65985.1	130605	124889	152452	254241	50148	214655	126699	79149.8	135273	87553.9	122160	371447
824	468.386	740.105	34296.1	45803.3	51832.9	52000	53144.4	50670.6	49087.4	74995.2	119113	66460.9	77997.8	44291.5	72008.7	101820	88114	108987	251878	33978.3	49676.4	38929.6	40852.9	71257.8	67303.9	75005	57458.1	62559.6	87284.6	102073	37325.5	50727.1	71875.3	40557.5	34534.3	36965.4	35643.5	38072.4	33408.1	33786.3	25940.9	33633.1	43683.9	31490.1	45559.8	39325.9	48209	35436.5	29020.8
825	469.241	491.913	87203.9	85207.1	86767.3	92165.9	86920	89162.2	87760.6	0	0	164.088	258.853	250.234	0	25079.3	5951.25	0	272.488	215.616	594.841	510.127	108.817	689.004	360.757	111.807	114.511	0	1216.79	215.297	865.841	298.755	106.688	47053.5	53793.3	50550	52607	58549.3	56110.6	55025	57456.4	53741.4	342.307	50080.8	56808.6	56159.4	49922.8	52031.6	57690.3
826	469.241	536.776	40123.1	40976.7	38453.7	38968.7	38860.3	36221.1	36182.5	0	0	147.884	104.397	0	0	241.609	379.36	207.406	463.135	556.651	0	233.897	0	256.331	250.043	0	316.009	0	553.606	111.932	248.855	0	117.938	0	0	125.11	0	0	0	0	0	110.926	400.359	225.797	100.453	0	112.609	0	120.898
827	469.312	574.583	34164.9	35334	33800.5	33263.8	34872.6	32767.9	33219	81833.4	61812.1	88524.6	120793	117807	35008	115324	73292.4	138855	389928	127932	34480.4	63275.8	55906.8	64162.7	121597	85150.2	78020.4	110016	68132.7	74067.4	58504.2	73393.6	37775.3	51044.6	39266.8	41115	16839.4	33116.8	30011.1	38218.7	61002.4	11870.6	58756.6	34226.3	21363.6	33634.8	21183.3	31832.2	90511.8
828	469.387	842.428	8769.58	8748.5	10566.3	11991.6	12486.2	12407.8	13325.3	57121.6	42091.5	45091.3	55143.1	151668	60893.3	88567.3	172483	249292	427231	104037	106678	126192	11533.6	43245.3	66302.4	69076.4	81546.1	45906.4	197527	50933.8	93309.6	47239.6	27684.6	6924.17	7425.62	8333.14	5544.6	5941.28	6164.75	4087.01	5363.65	6442.45	111594	6539.31	6122.93	7206.68	10729.4	11941.3	7010.51
829	470.245	491.82	23013.8	22085.4	21340.7	20091.9	21795.2	22596.4	21130.7	2772.66	2811.39	662.521	1654.09	5732.76	1334.63	6300.14	1933.93	5983.21	5105.08	4979.82	6934.46	6019.96	1837.99	2050.59	2944.75	2159.44	1901.81	5058.55	21593.8	2077.66	7001.11	1107.92	1823.29	10971.6	13842.2	12082	12923.6	14088.4	12148.1	12084.5	14220.3	13223.1	9143.79	12713.5	13278.7	13575	325.107	12839.7	14402.4
830	470.352	581.741	22271.5	21315.9	20147.4	20525.5	22989.4	21898.3	21455.2	40201.6	53161.5	28555.3	50158.4	58435.7	33044.3	43320.9	40261.4	65191.6	137533	51380.2	84602.8	143386	31306.9	43119.7	48081.9	35848	40059	48637.2	91514.1	43142.4	100150	41514.8	36862.9	24613.4	20349.5	22347.3	18359	19594.3	23974.1	20921	12950.7	16642	86124.8	23806.1	18773.8	22415.8	14148	20471.8	27457.9
831	470.351	667.184	60506.6	61526.6	59023.5	61163.5	62078.8	62742.8	62550.5	112758	173523	65088.3	133233	175844	114061	109620	131667	190386	255043	144556	344081	511046	95233.9	124855	133094	101147	110458	157435	329563	125197	349889	136953	135672	61954.6	49148.8	60460.4	56887.2	53149.1	59252.9	54115.4	42880.4	55294.1	304238	72769.5	62657	62469.1	58635	55501	54990.1
832	471.304	597.793	37087.1	36429.4	37827.7	38546.5	37173.6	35106.9	37357.4	3732.35	5471.47	1677.67	4196	5495.94	4365.79	4886.31	4878.2	5632.69	8663.94	4061.77	12720.1	19727.2	1305.12	4518.36	3171.3	3125.1	5241.81	4839.26	13676.5	4334.38	15056.5	5464.75	4457.25	19131.9	14441.6	17228.5	18227.6	15308.6	18990.6	16444.8	10551.6	16068.8	12241	18831.6	16399.8	18260	12100.2	16932.7	17435.9
833	471.354	670.015	8976.91	10310.7	12260.2	12119.1	12434.5	12864.1	11525.7	16183.2	28247.5	8858.73	18609.9	23464.6	17621.6	15173.9	17353.8	24308.9	34348.4	21797.4	58255.4	81893.2	4322.22	18016	18416.2	13174.8	14766.5	23861.1	52845.4	16926.2	59738	20124.1	18991	11591.9	9530.47	12490.3	9963.48	11695.1	11686.2	10374.9	5649.01	11597.9	52617.9	12533.8	14589.9	11813.7	13796.2	12724.4	9993.1
834	471.739	333.018	14534.4	15286.2	14576.7	15288.5	13620.8	14401.6	15919.5	77390.8	50609.6	67723.6	27157.3	100091	32514	82694.2	65660.1	212005	53193.8	72028.5	153895	322804	52540.8	129101	68664.5	10081.1	139922	120882	193807	30418.7	206897	95525.2	12615.2	7038.91	7396.8	18334.3	20506.3	12447.6	39014.9	19918.4	32277	29645.6	243935	26930.8	9423.27	18407.9	24499.9	2131	8570.69
835	472.336	460.452	9224.3	10006.7	8736.45	9135.81	9386.74	8952.44	8999.99	19357.7	22478.3	12645.4	22556.4	25653.5	17186.2	27120.9	20452.9	24444	71338.8	18038.9	42061	84242.2	19222.9	21136.6	15950	21541.7	22381.8	19679.7	63295.1	23108.5	69425.9	30021.8	14502.3	10885.7	12339.9	10295.5	12405.2	9902.87	16127.3	13067.4	7519.05	9940.92	49455.6	13190.5	3932.33	10445.8	11418	11154.2	8513.83
836	472.684	230.823	38264.1	37817	39459.4	40451	39536.4	38791.1	38602.1	55355.3	85480.8	72218.8	84172.6	86921.4	42528.3	120398	83928.7	103624	122717	90913.2	146816	121339	78140.9	70120.6	109382	59033.7	80554.3	66398	215604	67276.2	214033	96259.9	102646	30378.5	21934.2	18191.1	27441.3	30578.2	26652.6	26952	15314.9	32871.7	150857	41031.7	24155.2	25645.1	26717.9	24155.5	34052.1
837	473.348	795.451	24841.2	17965.9	23696.5	23602.2	23791.1	23083.3	24342.3	4760.16	6600.67	5016.88	3550.67	7825.09	4218.25	10373.7	9762.78	14512.7	56252.6	3331.68	8168.61	5478.31	0	7267.81	0	5261.95	10183.5	5045.39	16541.3	4137.23	9653.49	2814.49	516.631	4625.63	4798.96	4943.71	3846.2	2668.39	3819.64	2073.55	2447.31	2707.09	6002.47	2785.93	2365.82	5015.19	5596.58	5328.32	2292.38
838	473.686	231.379	5711.89	5131.7	6193.5	6121.93	5897.74	7065.81	6739.57	8148.58	14665.9	13401.6	14733.1	14077	8506.15	20004.9	15110.7	18038.2	18417.3	16961.9	25379.4	19956.9	12897.1	11282.9	16164.9	9760.56	12435.4	11220.9	35657.8	11372.5	34655.3	17234.4	17597.8	4796.48	4064.12	2270.87	4012.99	3950.74	4125.05	4355.9	2074.52	5419.04	23981.6	6947.5	4425.68	4847.24	4194.43	4206.98	5732.91
839	474.307	727.767	22160.7	23297.1	23017.4	20571.5	21378.6	19807.6	20754.8	213.55	1672.71	188.24	0	748.857	176.011	1361.57	1029.62	1305.08	4611.91	0	559.126	482.964	0	0	0	247.653	0	0	1015.58	0	4292.68	183.515	0	1567.13	1799.08	1802.14	1859.63	1643.51	1438.65	1804.07	2780.46	2645.98	0	3755.49	1977.33	1370.78	3231.14	1582.23	1531.11
840	474.265	360.819	12367.8	11388.1	11829	13165.6	13069.7	11449.7	13833.5	10364.2	12650.3	5283.24	9589.42	8520.83	7882.58	15955.1	10183	15038.7	35494.4	10986	26236.5	53298.1	7827.87	8735.45	9077.19	14115.1	13924.1	11221.5	43764.1	10186.4	47832.4	16133.4	4786.58	7159.08	8110.37	6742.45	10687	6158.08	12192.6	6932.04	6785.44	7176.34	32151.9	8731.13	4766.28	7967.8	8062.84	6348.82	5557.73
841	475.289	580.213	14454.6	14161.2	14295.9	14445.3	13478.4	13826.3	12975.4	2892.31	2455.01	1770.67	2867.32	3747.09	2617.97	3661.31	2035.41	2595.95	4025.17	3199.82	5887.16	10107.8	0	2862.58	1437.13	2491.69	2352.69	2815.81	7612.75	2961.17	7431.08	2376.96	1978.44	4422.6	3918.06	5360.37	7253.48	8363.25	3945.85	3383.36	4231.92	5270.52	5773.91	4680.92	3547.68	4350.17	3939.49	4890.23	4577.68
842	476.304	580.837	29099.8	30131.3	28264.7	27506.5	27536	27203.2	26197.4	15137.3	16992.8	14126.6	12982.3	16432.9	15651.4	27779.5	17473.1	26386.7	46199.6	21079.7	22973.2	29977.3	7721.64	14895.5	15984.1	10897.9	14963.9	13747.4	22976.1	14913.2	21400.6	15601.9	11359.9	11652.6	10138.2	14426.3	10523.9	8832.61	10198.5	7525.37	8858.61	9954.57	20485.5	10716.8	5725.07	8754.32	5424.1	10566.9	9344.11
843	476.323	676.422	18140	14216.6	15073.2	14595	12801.6	13267.8	14844.5	7561.89	10894.4	5936.27	6003.31	8960.97	6590.02	6418.98	8980.76	11870.7	13260.2	9386.22	12969.6	13070.7	0	8249.25	9239.6	7180.38	8194.06	8047.07	13180.7	5587.94	11938.2	8025.06	3112.36	6615.86	5375.91	6561.33	6217.83	5578.98	7574.96	7141.62	5509.11	6542.94	12244.3	7615.42	5619.98	6926.74	7145.64	6492.02	4442.94
844	477.359	703.613	43653	43026.9	44510.7	45353.8	46875.1	45825.8	48251.1	85418.1	133742	47334.7	97347	132166	82516.9	82566.5	96853.7	150444	210158	103799	252190	375007	70163	92761.8	97185.4	68371.3	77152.8	109958	253498	87863.4	245638	93630.3	104096	39817.6	33104.1	39805.8	38289	38424.7	42873.6	41352.2	29863.9	39835.7	230535	49973.2	43384.9	44164.7	45440.2	39295	38407.1
845	477.323	850.674	15309.6	15671.4	18737.8	18681.6	19567.9	20015	20533.6	65566.1	108401	38523.5	53730	165066	47559.2	79453.6	72240.1	170549	472106	78547	29337.2	41384.3	36555.5	93965.1	44901.7	78488.5	103319	53434.4	133426	36270.9	79879.4	46981.4	47138.1	25284.1	15685.5	16300.5	28847.4	15028.7	32288.4	26456.9	21947.4	27392.9	74968.4	28555.4	27569.9	25562.4	27581.5	28101.3	21949.2
846	478.299	613.936	149054	150327	155977	151669	152814	150575	151882	212029	232102	266434	214715	266576	197745	221077	246664	204475	931285	289602	241326	381032	201041	188280	195592	158998	324653	239775	351485	114584	231806	226177	209039	186376	166184	196285	159013	125648	187170	97620.4	88981.7	142493	271763	145723	179512	119261	145062	152861	143426
847	478.847	38.3828	11921.9	10940	12039.8	11693.8	11697.2	12716.4	11472.8	18358.8	17237.8	17435.9	18214.1	18273.6	18080.6	21478.7	21865.7	19440.3	16977.7	16838	15466.5	13338.3	17829.7	17632.4	18519.8	15505.8	18047.2	17984.7	14967.2	17518.7	13587.3	17246.8	17925.7	11448.8	12571.1	12213	11780.4	10935.4	10055.7	12165.2	11170.2	10970.1	16729.9	11683.9	10815.9	14307.8	10050.1	10880.5	10799.4
848	479.3	614.024	40415	36299.7	38688.2	35545.4	38034.5	37427	36321.4	46567.2	42839.6	60894.8	48228.9	53896.1	48075.9	50627.4	55732.4	50260.3	228781	69265.9	53889.2	78234.8	38657.7	37940.2	44749.4	35127.8	74864.3	56023	73101.7	26664.4	55001.9	49212.2	42897.7	44137.9	37027.2	49548	36462.2	28851.2	45241.4	23637.3	19151.4	34584.9	59301.5	32901.6	42524.8	25605.6	33347.9	32669	33453.1
849	479.263	737.858	10183.6	12143.1	13356.4	15975.7	15766.2	16331.9	15819.8	205.739	3054.95	181.338	579.516	1518.27	195.303	4225.17	4202.92	6353.69	11428.9	276.122	5608.83	3727.4	0	1348.43	0	407.563	0	758.424	5580.13	775.731	2341.93	197.155	0	6011.99	5154.14	4641.1	5600.65	5102.66	4846.44	4926.43	5211.37	3651.11	1107.58	5975.5	3751.86	4731.09	6036.52	4731.19	4859.71
850	480.341	661.835	167031	149999	149398	150434	151002	152565	149445	825208	916711	581776	820727	931138	986914	681555	1.09637e+06	1.6352e+06	2.28452e+06	886255	249320	315505	497587	1.18043e+06	807695	724160	840819	926060	779494	1.10817e+06	278197	607941	878234	297561	315744	297305	304704	285794	241998	253933	237068	268797	317020	199297	273881	401320	212904	270702	246468
851	480.84	38.5505	7440.19	8845.36	8858.65	9123.14	9154.04	8696.79	9209.64	11851.6	14234.2	13979.3	14041.9	12145.9	12060.6	14947.5	14692.4	13482.6	12098.2	12431	10228.5	12970	12872.6	12131.3	12566.2	10440.5	11793.1	11707.7	11456.9	13196.9	11458.1	11665.5	11027	8683.35	8801.26	8437.68	8310.64	8398.1	7415.34	7834.04	7367.46	8831.62	13055.1	7293.22	8747.29	9213.54	8054.9	7719.7	8275.06
852	481.241	506.207	15822.3	15878.1	15583	16052.2	15504.1	15506.2	14884.7	291.015	475.326	267.282	246.496	336.198	110.217	377.088	101.692	611.261	1440.31	255.383	1847.45	1940.03	99.2007	350.382	265.42	321.679	588.046	355.395	2052.13	123.29	2148.92	397.198	0	133.504	248.959	105.141	150.866	356.284	115.018	122.2	268.115	347.577	1341.04	152.368	370.653	448.99	538.443	372.695	213.789
853	481.339	662.488	50262.1	48533.7	51117.4	50453.4	49620.5	49556	51190.2	212729	238037	147993	209871	244991	255768	175517	290110	428918	599368	228088	67418	88415.4	122433	306519	207369	183364	217957	238075	206360	286251	75159.8	161585	221463	79762.8	87207.9	82477.1	78920.8	75473.7	67106.9	70524.8	64418.6	73401.5	84307.1	56034.3	73091.7	107983	58812.1	76209.2	67851
854	482.361	657.929	115946	116874	116569	115990	115308	115604	117593	1.03928e+06	1.22447e+06	671540	676178	1.02585e+06	833483	1.07533e+06	1.27288e+06	2.17411e+06	2.99023e+06	1.29457e+06	359045	274676	595531	1.48362e+06	769951	731855	857966	971546	802204	1.58943e+06	305557	620838	888248	272317	259405	320518	228998	295863	288655	243415	279985	276802	400562	247669	249361	479688	187538	239360	221607
855	482.325	606.6	78391.4	77361.8	76823.1	79876.7	77960.5	77434.1	80725.3	270346	167064	140640	251694	233854	159538	290301	201318	337751	1.01666e+06	287999	104649	178163	146561	289415	379186	192605	239481	262044	245985	228192	215999	223141	166557	131246	118858	163839	97352.7	112420	87836.6	154626	164756	97399.1	191413	120288	85632.9	126165	79703.2	107017	177841
856	482.325	711.762	52786.5	54210.9	55990	58120.4	59377.4	55596.1	58755.3	185344	240895	297107	322465	264288	224982	225753	279139	297192	1.1793e+06	310649	78989	82768.9	164480	201628	245286	243177	273349	347477	147557	198670	99464	285064	204330	195308	172835	155964	127954	158095	178718	155123	126288	142038	82247.3	135072	155907	127808	152071	148417	127412
857	482.404	770.688	77071.7	80488.8	86583.8	87453.8	89563.3	89437.5	88216.7	82289.2	91258.7	80038.9	73842.4	76701.1	73450.2	160447	89203.5	87222.6	163805	73199.4	92714.1	81188.1	46972.6	72120.5	36940.4	72737.2	77460.1	67361.6	82167	71243.2	88467	73769.1	64775.2	81405.1	90626.1	106077	74868.5	69986.4	69387.7	71187.7	69815.7	68735.3	73301.8	72329.9	103594	70241.7	135143	74603.5	75692.9
858	483.257	508.33	159748	157176	162753	161854	159003	155393	157788	635.028	748.802	113.566	304.249	0	282.451	308.013	134.014	950.292	1228.46	243.528	2089.17	2170.49	125.559	428.01	109.445	420.168	339.516	122.563	1785.44	106.129	1344.98	706.467	143.997	97.447	100.472	107.565	209.857	225.572	293.06	102.969	0	0	1656.62	258.826	0	106.677	494.812	155.916	0
859	483.257	554.399	38665.9	35790	36880.2	36532.7	35781	35924.3	34415.7	460.999	453.198	365.727	491.225	295.609	236.455	466.327	518.691	617.372	1701.35	932.525	1982.93	1461.79	0	137.281	493.671	204.902	818.408	310.24	2713.26	349.125	1257.77	536.529	253.065	351.177	377.326	371.114	305.601	347.173	472.044	212.695	239.245	0	944.131	420.08	0	597.244	766.264	163.055	221.543
860	483.364	657.774	31308.1	31090.6	30117.9	31878.8	31894	33288.8	32078.1	264194	305782	169586	175747	268805	216344	276541	332063	552223	767877	336323	97446.9	72052.9	151821	388842	191797	186811	220070	253016	202847	413092	80688.6	156196	225908	72238.4	68769.4	85066.6	61131	78669	75419.3	63889.7	73624.9	74335.3	102864	65169.3	63762.9	124553	49506	62911.2	55087.2
861	483.326	605.919	22787.8	22405.2	22369.2	21866.6	22179.2	23311.7	22593.8	70775.1	45857.2	37046.6	64040.8	63122.6	42478.4	76741.8	51195.7	86247.2	255081	77467.6	31786.6	52975.9	37288.6	74648.1	97860.7	48868	60299.2	66333.9	69167.9	62269.1	60289.9	58581	44078.3	37196.4	31382.2	42038.7	28009.7	31245.7	25254.8	43061.1	44911.1	25608.7	51920.2	32447.7	23386.2	33491	23778.8	30402.3	48488.3
862	483.328	711.801	13573.3	12021.2	11985.3	15454.3	13080.5	15805.2	14684.4	43403.9	60462.3	73108.9	76292.2	62810.9	57047.6	54029.6	66726.7	71437	287913	73083.1	22964.4	23132.8	35880.3	51084	60142.7	59736.2	63899.9	88960.3	40519.3	47686.3	49986.3	69037.5	51659.1	53393	46207.2	42005.4	35527.1	41189	48734.1	42570.4	33048	39954.1	35577	36751	43625.5	35630.3	41657.7	40397	34337.2
863	484.26	508.385	44912	41903.3	40252.1	41258.9	41294	40807.6	40529.1	595.93	1043.68	133.899	931.955	609.446	767.118	1143.1	469.522	1060.26	9179.27	246.46	2655.25	4981.83	471.989	757.624	529.215	799.14	499.912	642.711	3455.85	1202.84	3853.57	872.837	115.902	112.036	312.103	639.575	340.538	130.227	794.539	158.767	238.551	358.98	2612.64	231.691	235.263	235.991	225.764	361.512	0
864	484.368	744.705	22265.4	23734.1	26691.3	26156.1	25770.5	26693.1	28313.4	43847	75888.1	25594.9	54107.1	68123.2	45387.5	48467.8	61798	83444.3	126661	57787.8	132820	190467	33196.2	52108.3	47753.4	39575.1	47481.8	63401.7	133480	50854.9	129531	51610.2	51533.3	26790.3	23672.1	27123.8	24171.3	23345.5	28456.6	23223.5	18822.3	24289.4	120018	29893.8	28305.7	30072.2	28010.6	24934	23428.9
865	484.364	657.928	7418.38	9403.24	7981.08	8331.35	9653.23	8420.99	8994.34	50272.5	64527.7	32072.4	37645.6	52592.4	45507.6	53591.5	61511	103077	140860	65525.1	49340.8	54032.5	26418.8	69164	38830.1	39693.6	43349.7	51579.2	58826.8	81282	44002.4	38236.3	46698.1	16033.2	17410.2	23183.7	20422.5	21138.8	21683.3	17898.3	16815.6	20452.6	42596.2	15564.8	22250.6	29742.8	20733	20523.6	12693.9
866	485.328	625.55	102976	151235	100890	149250	105277	148540	107261	99021.4	155789	56498.5	112821	148335	96177	96846.7	111010	157886	202556	126593	334021	482389	91397.1	107728	111101	88841.3	90342.3	132025	309982	104056	343116	119805	121232	46376.4	37596.5	49551.3	42341.9	43190.7	49004.7	47301.5	35192.4	50349.5	300254	59523.8	54223.7	52630.8	51109.4	41988.6	42461.5
867	486.355	512.677	14514	14898.2	14400.5	14189.4	15474	14765.2	14718.8	27124.2	30973.9	18118.9	33127.4	31052	24463.5	34390.4	24284.9	35622.3	72947.1	27551.1	64795.7	116939	25610.1	32789.7	22884.1	28717.5	29667.3	27495.2	83574	32518.6	97827.5	35696.8	19846.7	16750.5	14966.6	13652.3	16658.4	13530	19596.8	13815.7	11489	14712.8	71527.6	14336.3	10221.7	16046.1	13779.3	14488.3	12103.2
868	486.319	625.571	28593.3	28413.2	28971.2	27803.4	27023.4	26403.7	27470.6	16309.4	30845.4	8740.62	18669.5	30901.4	16342.4	14982.8	17141.5	24388.2	33228.1	20372.8	68403.2	101118	14581.1	16881.9	18446.4	13464	15780.9	23098.5	61552.1	18817.6	74380.8	20600.5	21040	1655.54	1041.38	1898.41	1386.97	1830.36	1681.73	2201.24	1054.15	1783.62	59620.5	2582.07	1152.58	2212.26	1811.91	1430.56	1438.56
869	487.361	814.378	32911	13098	17814.7	23987.1	20252.1	25680.4	17326.8	9044.63	7516.82	5626.5	9065.26	14549.5	5472.15	28611.4	42256.1	53419.2	130504	10064	7323.9	0	187.909	5548.15	0	5412.58	10818.1	5124.77	14952.3	5988.42	8158.51	6128.65	2210.01	5577.86	5907.19	6461.18	5476.1	5504.9	6402.03	5114.8	4987.74	5309.92	4434.55	5579.94	5168.34	6465.09	8409.18	8319.17	6184.17
870	488.34	379.96	11397.4	13629.7	12384.8	13396	12971.6	12220.4	12951.7	21325	22364.8	10951.9	22775.8	23543.2	18446.2	28729.1	20080.9	25778.4	56969.6	18918	47270.7	88598.4	15467.6	21269.1	14293.6	24221.5	23894	19748.2	69928.4	24171.3	79986.1	26302.7	11218.5	13147.6	15081.4	11899.3	15912.8	10548.7	19451.3	12019	10060.8	13431.2	53378.9	14353.6	7691.34	13979.7	12788.3	11642.1	9940.13
871	488.321	746.328	20127.7	20941	22588.5	20090.9	20755.3	19579.5	19189.1	67583.2	78675.2	38034.4	55558.8	43328.5	63914.2	70013.4	135875	159889	153880	52434.7	9744.22	5348.68	16895.7	56485.7	21468.9	50533.6	50716.1	55471	34643.2	108715	7103.88	41463.2	58657.2	2816.25	3443.96	2171.37	11455.3	11290.5	2136.26	12669.8	11898	12512.1	8940.5	2674.21	11938.3	10510.4	11647	10461.2	8418.29
872	488.873	38.1067	22848.7	24238.9	25934.8	24959.2	25165.1	24985.5	26073.3	30762.7	30582.3	31125.4	30738.7	30341.2	30267.4	35521.3	32545.6	31556.4	22027.9	30422.6	24219.7	21591.5	28872.8	27375.8	27926.1	30053.6	30157.4	29743.3	20164.7	29830	22037.8	31231.8	29347.9	25111.4	24311.7	26243.5	24998.5	26048.3	24411	22363.6	23669.9	24767.6	21727.7	23547.1	22697.8	24712.6	23426.3	24342	23855
873	489.305	601.159	27646.1	27162.2	25404.6	25038.8	26893.4	25068.7	24779.3	952.87	627.169	343.551	1081.79	1206.53	137.039	1921.72	932.223	1227.92	1013.74	680.372	2518.85	3402.34	0	472.582	280.686	711.358	1166.41	392.663	2962.24	926.623	2234.43	357.278	640.901	0	627.415	204.971	0	218.52	351.418	394.504	106.083	385.438	2312.05	144.354	0	131.44	264.191	223.996	108.052
874	489.326	746.393	11843	12617.3	16855	17530.5	17537	16836.2	16424.5	17889.3	23820.2	10181.9	15592.7	14623.4	16285.9	21503.1	39599.9	46466	46806	13892.1	10253.2	14639.7	799.856	16947.3	3437.06	12727.5	15791	14612.6	13122.6	28734.1	13003.7	11184.2	15592.8	12495	10662.6	9838.89	6637.24	5207.71	8988.9	4623.77	6519.87	7282.18	5238.82	7751.4	7443.41	9129.26	12105.4	13702.7	5342.28
875	490.373	796.46	22358.5	15546.8	21458	20317.6	22041	21657.2	22179.9	2123.09	1894.45	330.583	1087.64	2641.45	1116.93	5361.53	5422.8	9209.38	42890.3	597.101	3696.95	1402.91	0	1763.94	0	1557.54	2537.64	1779.36	6956.04	1743.95	4134.1	1325.58	385.937	3356.09	2505.01	3750.68	2305.09	2510.23	3196.63	1374.28	1865.43	1509.57	1833.23	2141.35	3135.39	3504.7	6200.01	4367.15	2172.43
876	490.292	574.58	91125.4	96020.1	91448	86901	88755.6	84208	85119.9	123024	106451	139233	198895	195800	66755	170617	136784	258633	468962	218919	59327.7	117288	47524.4	103014	187323	132315	128290	184070	131540	126185	116536	112248	61902	17398.7	13470.6	18965.6	9160.88	11962.6	14669.4	17726.3	20474.6	6861.8	93682.2	10870.8	9950.72	12627.6	11166.4	11368.8	28460.4
877	490.652	40.4035	9721.29	9211.24	10723	10403.4	10569.1	10892.6	10776.8	13434	11140.5	12541.5	13054.5	11866.8	12003.6	15457	11830.3	12168.6	24035.5	11660.2	26268.2	22310.6	11321.2	10902.2	12748	11179	11129.5	10643	21675.9	11464.1	23424.1	10924	10282	10574.3	10516.7	10489.3	10104.3	10505.9	9816.33	9828.58	10248	10534.7	21686.8	10720.3	9166.03	12367.2	9666.92	9243.05	9500.29
878	491.374	863.663	20966.6	22945.2	23527.8	26537	26536.6	26276.2	25774.7	28560.6	28512.4	24671.8	33338.1	94160.5	33352.3	155253	283451	459540	416720	48679.5	33935.2	15474.9	0	4115.67	3869.43	7716.03	30519.1	5203.47	43150.4	12092.1	30324.6	20844.8	5560.83	25306.9	24496.9	29275.9	24571.5	22054.9	22791.6	26524.2	24175	25166.6	30249.3	24020.8	26606.7	20173.4	31903	21377.1	24633.4
879	491.373	785.74	24823	20653	26676.4	27102	27473.9	28027	31612.6	28400.8	37915	27145.2	32477.1	45376.7	29140.9	40167	47950.7	63965.5	147084	36932.1	67097.6	87291.9	4254.94	29581.9	0	28589	48389.9	33294	89033.9	33308.3	66901.6	36507.5	28787.7	24418.7	22162.7	21875.8	18862.6	16952.3	20827.7	15570.7	15827.4	15340.8	60853.9	19513.4	18277.4	21959	26199	23165.8	19434.1
880	491.302	575.203	26371.1	26827.5	25059.9	23931.7	26365.9	27811.2	24858.6	33572.3	27773.2	36563.4	49332	51192.8	18365	45187.4	35946.5	65440.9	114632	54798.7	24676.1	43194.9	10855.1	27690.4	47224.9	35394.8	33925	48607.4	39698.8	33372	39160.7	31009.2	18254.2	4468.01	3653.89	4370.56	2719.29	3861.43	4545.4	5037.79	4358.07	2525.05	32478	2809.95	2514.57	4393.54	2441.66	3196.19	7456.09
881	492.364	658.597	73393.9	75005.6	78043.3	77276.6	77225.4	79890.2	82164.7	138363	219830	80171.6	166073	221393	143281	138939	162355	238250	321779	182503	430809	635612	125820	155588	169077	122007	134297	193091	400413	153541	434327	163016	172955	76261.8	66068.1	79333.6	72236	69305.8	77002.8	72817.8	57063.5	69975	388990	90352.7	80842.2	77830.6	76702.8	72217.9	67220.2
882	492.316	575.37	37778.4	39108.9	38233.7	37183	39257	39627.1	37963.2	16943.9	15141.7	22199.6	28567.5	26541.8	11829.4	24575.1	19105.8	27467.5	109329	45926.7	15916.7	25484.7	6864.69	19569.8	23868.4	13909.3	35952.5	31316.1	37504.9	19607.3	19990.3	16095.4	11648.4	13276.4	10366.3	7654.65	5665.28	6217.64	7521.82	4667.2	5921.28	2872.62	17552.6	3998.51	9222.06	7624.87	4139.45	5046.62	6926.52
883	492.846	40.4549	12529.4	12726.8	12024.7	12598.3	12022.9	12517.1	13216.9	11482.2	10522.8	9477.62	9940.22	11017	10522.9	15679.6	10906.9	12290.7	27717.3	8918.55	22608.1	18914	9988.2	10055.5	9487.99	9245.91	10646.1	9257.94	19271.5	9656.57	21084.4	10939	11350	12751.7	14325	14981.4	13504.6	13005.7	7737.83	12601.2	11034.8	11734	19566.2	7461.44	12984.6	14050.6	12318.7	14434.4	12039.9
884	493.343	576.211	23069.7	23673	22915.1	21550.1	23352.1	23290.1	22706.2	27964.4	38333.8	16514	31104.1	39253.8	29045.5	29673.1	31746	44934.5	77490.6	35706	75389.9	103077	27157.6	31246.2	31075.2	27140.8	28198.8	37400.1	73449	30079.7	79314.9	33906	28594.4	15794	11391	13245.6	13190.1	12769	15020.9	11839.6	9439.4	13136.4	67825.2	16916.5	14296.1	13768	13347	12792.6	11480.1
885	493.367	658.399	15656.3	14227.2	15198.3	16361.8	15750.6	16097.6	16782.7	23483	35921.3	12149	28334.5	34796.7	26512.2	22768.9	26672	38165.3	48097.5	29934.3	81922.7	116387	11739.2	28030.6	25582.6	19899.1	21934.7	32526	77353.1	27273	81871.7	29901.8	29685.4	14774.1	11698.7	14974.5	13976.2	13578.9	15066.2	13852.2	11621.8	14619.3	69151.4	17096.6	16503.4	15434	15146.7	14503.7	13093.2
886	493.281	750.469	8990.34	7634.17	9099.62	13210.4	10573.4	11174.5	11948.6	5358.49	8539.36	2729.27	3096.56	5434.34	4338.83	11732.8	12067.9	24677.6	27376.7	9481.77	1709.87	1761.74	0	7243.49	0	3557.05	7464.99	3962.29	9045.91	9753.94	3357.73	2667.88	1908.23	5896.86	6860.02	5171.35	5198.27	4074.02	4471.69	2827.57	3638.27	2074.8	1976.26	3618.53	4279.32	5531.82	5992.98	5581.08	3967.01
887	494.325	596.368	380698	377585	372292	379809	374977	369317	372125	862381	1.08399e+06	931794	994930	1.33122e+06	461719	992172	946891	1.79031e+06	4.49153e+06	1.48062e+06	430681	742378	840961	1.05464e+06	1.24543e+06	728297	999184	731126	787811	878894	521634	765937	684658	665685	437399	342315	461359	357779	376973	346017	231330	222010	804498	391571	315659	494417	419289	395762	332854
888	494.36	693.358	4816.17	6659.37	5268.45	5168.44	3981.07	5039.21	5485.88	39937.2	42081.4	16234	33258.7	37290.7	54334	33690.4	45788.4	98928.4	137231	35878.3	19188.9	19414.3	16188.6	74926.2	46127.1	44536.8	44706.8	42483.5	67394.3	66568	17618.1	26402.2	64545.8	12057.2	17295.7	10461.3	15698.4	15419.9	7826.39	11925	13911.1	14753.7	17911.7	10053.2	9678.89	22351.4	11358.6	9159.66	12766.2
889	494.84	40.785	18459.2	17000.6	18469.6	16262.4	17389.3	19428.6	17883.7	20368.1	18618.5	17714	20662.4	20688.8	19407.2	25389.5	21442.5	23126.2	35011.8	20703	35143.5	32488.7	17428.6	17691.2	18172.3	17762.7	17865.7	16438.9	31825.4	17945.2	37113.1	20310.3	20898.5	16520.2	15689.5	14363.8	16691.7	17781.7	14895.5	14736	14812.1	15098.9	32870.3	14531	16864	18732.9	13966.1	15608.7	16638.6
890	495.327	596.353	100934	103225	102334	103487	102504	99791.2	104481	222599	279238	245025	255174	349681	123748	250723	242705	461528	1.19419e+06	389621	120426	199598	212029	269913	320520	189101	262249	194214	214240	232337	142392	201264	181760	175984	118379	92789.2	126286	95647.2	99621.6	92341.6	64107.4	61508.7	210570	106869	88522.5	132952	111922	103376	92115.5
891	495.333	811.915	23727.8	12568.4	21767	26353	28064.8	29764.5	28536.7	37274	44953.7	4767.81	6040.25	77530.1	4524.76	40883.8	49424.6	102762	269775	42198.5	3086.13	0	1473.86	35359.2	0	34320.8	45069.9	5426.06	64551.5	7951.83	3748.42	5274.26	3468.26	14552	13577.5	16237.6	14494.6	4956.16	13815.5	6301.4	12846.8	10536.1	2656.13	14932.2	11828.8	16899.4	10407.8	21508.6	14671.5
892	496.346	640.314	1.24935e+07	1.2456e+07	1.26513e+07	1.27956e+07	1.28599e+07	1.27905e+07	1.2909e+07	2.84529e+07	3.0028e+07	2.83971e+07	3.1383e+07	3.29203e+07	2.69705e+07	3.24195e+07	3.53547e+07	4.07169e+07	6.24351e+07	3.36114e+07	1.56184e+07	1.58708e+07	2.68941e+07	3.26764e+07	3.59311e+07	2.80458e+07	3.27134e+07	2.98946e+07	2.44831e+07	3.16771e+07	1.87245e+07	2.96853e+07	2.70502e+07	2.13642e+07	2.30161e+07	1.92324e+07	1.96145e+07	1.88647e+07	1.92296e+07	1.75165e+07	1.67794e+07	1.69945e+07	1.95848e+07	1.85285e+07	1.92323e+07	1.94392e+07	1.84216e+07	2.05708e+07	1.97162e+07
893	496.42	809.577	47260	64987.8	74736.8	76541.2	76802.6	78648.8	76356.1	85529.5	112191	81731.2	81090.2	44611.9	77092.2	86953.5	86172.5	52514.2	110565	42149.8	75055.8	48983.6	57181.7	42716.7	29317.4	105865	46925.9	70921.2	95043.1	69802.5	65496.9	69941.2	64180.4	57066.3	56239.1	60096.8	53005.5	54189.9	49009.8	49800.8	48414.4	49861.5	68609.7	48462.4	65191.9	54345.3	75107.9	54926.3	53521
894	497.348	640.439	3.16135e+06	3.18576e+06	3.22353e+06	3.26576e+06	3.26844e+06	3.25086e+06	3.29238e+06	7.81679e+06	8.33327e+06	7.83622e+06	8.7971e+06	9.26508e+06	7.40865e+06	9.27809e+06	1.01665e+07	1.1931e+07	2.01399e+07	9.47297e+06	4.11429e+06	4.19571e+06	7.32202e+06	9.2234e+06	1.02796e+07	7.68258e+06	9.25292e+06	8.33549e+06	6.76991e+06	8.84627e+06	5.01227e+06	8.20621e+06	7.41943e+06	5.4375e+06	5.93957e+06	4.941e+06	5.05325e+06	4.81979e+06	4.95376e+06	4.48835e+06	4.31573e+06	4.37105e+06	5.28147e+06	4.75712e+06	4.89925e+06	5.01136e+06	4.71972e+06	5.2784e+06	5.09066e+06
895	497.421	808.686	17888.5	22049.5	23771.3	23441	23844	25373.4	24223.9	15314.4	17603.2	14045.5	14316.6	13759.2	14702.1	27947.2	19747.7	18004.1	34831.1	13001.3	14388	7918.58	9264.25	12653.9	3020.35	13867.8	13673	23157.2	30949.8	13317.6	11993.7	22989.6	11849.6	19546	16975.3	19342.1	17548.5	17000.1	16052	15803.6	14821.2	14982.9	22205.2	15304.9	21757.1	17997.5	24227.7	16041.4	18500.3
896	498.348	640.381	549860	539968	549793	550148	566245	553799	569711	1.35526e+06	1.43466e+06	1.36824e+06	1.52304e+06	1.59283e+06	1.29053e+06	1.59346e+06	1.75513e+06	2.04379e+06	3.47959e+06	1.62983e+06	736018	739005	1.27163e+06	1.58925e+06	1.74154e+06	1.32045e+06	1.60906e+06	1.44054e+06	1.16435e+06	1.52624e+06	880747	1.42745e+06	1.26219e+06	933930	1.00806e+06	847201	862906	824928	846977	760398	738023	743760	930838	812188	826519	861828	808346	904085	851182
897	498.9	37.0319	126354	127231	123824	131437	129462	125770	133230	154449	148197	152333	154755	143301	148934	161955	151520	146718	107095	142373	118271	111619	149790	141861	140210	154049	138252	152829	103378	146469	116056	150295	147728	127632	123161	124077	127587	134272	128317	126077	134377	130775	110651	129224	117582	123682	130187	139888	133115
898	499.347	640.745	91694.3	93862.1	94557.7	93015.7	93129.2	99040.9	94529.1	187355	200733	184268	210412	222946	178362	211887	243708	279586	478701	222244	110131	118923	165097	215387	239453	178197	215106	201263	171717	207391	129169	194745	176192	132206	137759	119982	121342	117696	117442	109338	101163	103410	133349	114444	117963	122406	111657	122153	118307
899	499.372	697.575	61451.9	63513.1	63500.8	64655	67294.9	66199.1	65495.9	124747	204600	71522.2	150098	199385	129463	122164	155545	223920	331369	160406	371948	557557	111332	146077	149756	108832	121948	169795	376962	135156	376493	147172	154732	63778.6	51784	60249.9	60126	55679.7	58045.8	56657.2	46364.5	58452.5	337531	73588.5	64261.5	66200.3	61542.4	56728	55420.7
900	499.323	824.666	33930.5	30271.4	33542.2	38319.7	37929.3	39463	38900	88714.2	129734	43925.6	70053.6	210036	67676.4	121443	99995.1	254289	871326	85000.1	39727	41077.9	2042.95	110004	2012.44	90823.8	127345	61585.1	133530	43182.6	92105.3	63405.5	59128.4	41775.2	27780.2	34456.4	47528.2	27877	54685.5	52441.8	43066.7	54415.6	88686.1	57147.6	47593.9	43739.3	56316.3	54415.3	39033.9
901	500.376	536.899	16703.9	16499.9	15866.2	16957.3	13809.4	16072.5	15736.4	29814.9	36856.1	16517.3	34082.6	37859	25778.7	34854.8	30191.2	42428.9	84416.4	31102.7	70188.3	129796	26425	33176.7	26531.2	29683.8	32541	32123.4	88978.5	34209.2	101839	37086.1	25037.5	16443.1	14668.6	13883.1	16303	13706.5	18025.6	13777.8	11602.5	14913.7	77619.1	18853.6	12055.5	15584	14413.6	12279.3	12759.6
902	500.359	589.844	32331.3	33207	32151.1	31078.1	32536.9	33290.9	32923.3	64865.9	98628.3	41939.1	78616.2	104500	65194.2	68264.8	75689.3	108679	184766	94763.9	189416	266664	62829.9	77022.6	77605.9	60971.8	69509.6	92105.8	189369	78996.2	202479	81469.6	75624.8	31735.9	23616.4	30879.3	28568.9	26091.2	30244.7	26222.7	21309.8	27450.4	172400	36139.1	28353	27572.7	28884.6	27446.7	25109.1
903	500.325	825.353	9868.83	8963.22	9937.38	11611.4	12048.9	11437.2	13185	27267.2	38897.2	14160.9	22972.3	61535.7	21963.5	39725.5	33242	76724.3	257142	27476.9	12505.7	10914.3	2051.48	32779.7	0	27542.1	37925.2	18190.2	42179.3	12552.7	27265	18373.2	16500.3	13216.8	8590.84	8986.48	15754.4	9164.8	17328.5	16359.3	14085.8	17409.6	27957.2	18569.1	15477.8	14427.3	19159.5	17158.8	12416.5
904	501.36	839.914	148181	135000	155564	164085	163541	167026	171192	174660	261461	92028.2	154143	491754	159486	217803	177813	484445	1.87903e+06	199268	101436	110678	118992	268692	129879	172586	328244	120718	388909	98930.1	232188	149913	114555	84731.1	63939.1	66426.5	112976	55867.5	116342	105922	88840.3	118714	204686	123640	108674	97707.1	118089	104600	71164.5
905	502.298	616.273	169743	124681	115101	111101	107927	107229	106366	105188	127856	110180	164443	127959	136987	131461	120165	121517	344011	165232	86818.9	94496.1	91296.2	97933.9	129489	132782	120337	175078	106358	106415	90842.7	131121	131714	93037.3	99786.4	103521	99354.3	102745	126490	126032	81639.2	126396	84199.6	83628.9	91022.7	89308.6	105401	123470	78004.9
906	502.368	839.994	46186	42946.4	48479.5	50579.9	55410.7	52248.1	54327.2	56210	80372.8	29021	47241.5	145341	48866.5	63240.5	55940	144804	556346	77723.6	33445.9	32300	32636.1	81719.3	32212.8	49419.5	95556.9	37123.6	116677	33570.7	71948.5	46711.1	32815.2	26553.7	20606.9	19315.1	34041.4	17575.1	34895.8	32339.3	27642.5	35565.9	59330.8	37908.6	33820.5	31428.5	37599	29988.9	21142.6
907	502.358	394.314	13921.7	11424.2	12130.9	11706.5	12708	11880.9	13732.8	20608.7	27792.2	12475.4	24561	24265.4	17142.2	32181.5	20974	25527.1	54501.2	18310	50521.9	96502.8	17772.2	20995.7	16301.2	26097.2	22100.9	18812.5	75596.1	26472.6	88973.3	29543.2	12437.8	13116.2	12831.4	11418.4	14643.5	11570.4	17330.9	11981.5	10343.9	13108.8	59830.2	13814.1	7145.27	11525.7	12281	11124.4	10111.1
908	502.338	771.402	45092	49030.6	52669.8	49489.6	49141.5	46076.8	46831.4	0	2212.04	0	0	0	0	2564.57	2058.24	6853.08	11088.7	0	0	552.698	0	363.539	0	0	0	0	222.811	272.668	0	0	0	4042.03	2906.35	1974.88	3894.66	1597.09	3333.76	3687.01	2530.04	4332.7	0	4179	5671.78	6177.46	4930.01	4903.78	3007.42
909	503.317	620.592	97165.7	93225.2	93261.1	91989.7	90005.8	90152.4	91375.3	12963.9	25285.5	15918.6	39983	22907.8	34483.2	20796.2	11017.5	15986.5	81712.2	35185.3	18898.9	25798.8	8425.28	6662.15	29800.9	32930.9	14145.1	43205.9	15829.3	15083.9	29692.4	29749.2	32538.3	27017.6	29581	29839.5	27831.6	30259.8	36329.5	35742.6	23091.4	36090	19235.7	26309	24347.3	25842.7	30876.1	35543.9	24621.8
910	503.394	840.831	34991.6	8179.27	19861.3	20805.8	21104.3	21179.4	21306	23344.7	21578.1	19348.2	14155.5	46363.4	21245.2	32227.4	39109	72071.4	197680	43798.9	25331.8	10790.2	3920.3	22473.9	3734	17534.5	29683.4	11138.3	43667.1	21223.1	20450.8	18507.6	6858.43	14834.4	14241.8	18145.9	14747.9	2633.82	13666.3	1434.09	12672.8	2181.69	26712.3	14167.9	2178.43	14923.9	22212	19733.7	3206.68
911	504.344	658.205	37823.1	40566.4	37924.6	39104.7	39394	37278.8	39264.4	196964	206144	144603	133977	197540	165035	220018	251414	324307	261590	234195	98781.4	84225	67474.8	205906	138564	131208	151054	168139	165275	230584	87080.8	130550	148323	32312.2	27786.4	33839.4	27616	31826.4	29227.2	29260.2	28937.9	30329.4	115393	26494.7	27202.2	40449.6	26098.4	28163.8	26315
912	504.315	616.827	38538.8	32280.9	33950	30000.3	31889.9	28328.3	31581.8	50551.6	22844.8	18662.6	47460.4	39301.7	23749.2	60107.4	22829.3	49138.4	99977.9	51220.1	34826.1	54481.2	12463	44544.7	58407.8	37726.3	22930.9	32615.6	60612.1	25854.3	73349.9	42399.4	21078.9	13630.3	12952.1	16453.5	8607.84	11500.4	9214.67	17084.9	16636.9	9532.11	56932.9	12403.5	9010.29	11365.1	8065.96	12983	16666.3
913	504.356	743.26	2781.31	4138.01	3389.04	3404.89	2700.54	2968.37	3426.24	4153.02	13593.6	742.976	3946.53	13604.9	5375.4	7772.28	11695.8	16073.2	66503.9	6543.61	20054.6	25918.6	0	8464.7	0	2606.1	4411.6	5941.89	18857.5	3068.68	21224.5	7024.69	3351.39	11129.1	9185.21	9551.56	15143.4	1439.78	15986.2	2076.07	8289.37	13541.9	13883.6	15359.6	17056	19087.3	14107.3	12880.6	1177.51
914	505.353	656.297	22866.7	19721.7	21527.6	22533	21488.1	23018.8	8499.16	61366.2	70312	43286.1	51411.4	68629.7	59596.1	67994.9	80387.8	101215	81516	80868.1	81699.9	112170	24146	65938.1	49258.5	45115.5	52847.9	62276.2	94164.7	76839.2	90260	59314	51037	8236.15	10130.8	12728.4	7761.08	11244.1	10510.5	10112.7	17627.1	10835.4	74962.5	10816.6	18995.2	23587	11346	20289.7	9347.9
915	506.361	679.449	37340.7	34647.8	35799.2	34877.4	37963.5	36716	34813.9	142832	188035	90445.5	129982	148727	161314	117108	182119	313644	627650	147322	43846.4	56532.7	129245	229465	136710	125912	139259	126023	159775	205781	43935	100766	159596	61579.5	44956.6	42244.7	48454.1	50374.2	39004.2	42719.4	37695.9	47551.3	57745.6	42041	46322.1	68206.2	41800.9	42450.7	39894
916	506.379	742.237	38771	41261.4	45708.7	42430	43381.2	42826.6	43803.7	76693.8	125049	62037.3	102139	124292	76412.6	91998.5	102914	147707	218837	97558.6	224760	326649	44770.9	88183.8	96843.1	70597	83960	104126	227546	85992.5	223051	97775.5	90507.8	44927.4	38310.2	47797.7	43507.5	42284.8	46223.8	41762.2	34569.3	42139.5	206070	53422.1	49832.2	46991.8	46158.4	41379.7	39671.2
917	506.332	599.219	29414.6	30849.1	30218.5	29090	30508.8	29001.8	28628.7	6506.97	5128.75	4970.07	6624.99	11444.2	3464.95	11935.8	13213.2	16674.1	37193.8	20262.3	6592.18	8972.14	2317.31	12228.9	12281.1	3133.58	5716.22	4846.4	13605.8	7209.12	7244.5	4023.51	4151.46	4278.99	3944.66	2189.82	3700.26	2072.33	1964.18	2325.81	4011.52	2356.83	8399.03	1880.99	3193.24	3522.47	1311.38	3044.99	3319.23
918	507.369	620.412	59405.1	63098.8	61535.3	63508.6	62812.2	63278.7	64896.9	100742	172227	57214.7	123398	166248	106133	97453.4	115963	173953	222183	139355	325695	481984	97508	115415	125670	95748.3	93400.5	140148	303870	123547	341892	132044	132189	54997.4	38180.7	48102.2	48395.9	45539.4	51569.2	48483.4	31400.4	47977.9	301546	68617.2	54426.2	51983.8	55314	45878.2	41343.2
919	507.294	770.935	12324.4	14789.2	22590.7	26908.9	26508.5	28604.3	29840.1	2490.65	8381.49	1503.88	630.392	8664.18	1849.53	16100.2	16102.8	27167.4	67896.3	9382.14	8484.95	9120.65	0	4169.1	0	1809.92	6210.72	1463.45	24332.9	2038.86	11835.1	348.383	790.853	3786.81	5911.22	5837.37	6348.99	3346.08	5604.01	2894.79	3755.72	3179.41	3174.57	5465.93	4532.46	5002.4	8498.96	6845.38	3295.49
920	508.377	676.381	132856	131915	133606	134313	133382	136904	134362	533552	871989	422137	472375	713995	514250	695125	716561	1.15753e+06	2.54916e+06	661538	260736	241590	541830	827661	501976	506148	640805	547734	654045	796825	241127	455614	612367	245485	153659	161142	139848	157495	158877	129496	134000	172940	320536	146314	150143	245165	129832	147669	127976
921	508.342	628.132	33825.3	34242	34823.1	31955.5	33468	32522.2	34274	65839.8	100160	54004.7	85443.4	102000	38886.3	86117	102174	127844	269504	158263	101396	138842	79676.4	97326.6	106135	52458.1	88195.6	61777	144578	166754	100593	80088.2	64246.1	63524.7	46286.9	32938.7	40936.1	34012.1	30460.4	38906.2	37021.3	43285.8	134976	34649.8	34443.1	43692.7	30805.1	31612.2	38509.3
922	508.376	738.893	14139.8	13262.3	15857	14992	16159.2	14979.2	15172.4	169770	219275	85608.1	164070	162624	212364	120042	231793	409882	927895	160689	41724.3	45613.4	113804	258584	138820	159623	171803	191063	186937	282869	36677.6	116755	206182	50642.5	57634.6	41668.6	51102.9	55040.3	35620.8	42317	44671.9	56533.5	53999.1	33932	49324.3	70450.8	41290.2	45191.6	43300.5
923	508.457	860.308	377.21	796.858	615.354	1231.71	1662.71	1322.66	1167.79	28445.5	28962.2	30714.9	28182.2	27630.1	25786	31335.2	46096.4	31731.4	25836.6	34451.6	24794.9	20997.3	7564.89	15184.1	13698.4	23355.2	24833.1	23207.5	22067.7	31251	22515.7	25418.2	19243.9	1254.11	854.284	890.831	1123.77	1080.01	1050.49	706.428	763.482	1091.42	23720.3	1087.19	707.97	940.742	1412.39	829.482	742.272
924	509.379	676.378	40539.2	39617.7	41687.6	39320	38534.3	38998.3	38972.2	150788	244123	123270	132859	207688	150994	198179	205885	329074	724723	194514	86310.4	74118.7	151627	231234	140681	142353	175211	158814	183608	219073	74058.7	131217	175752	70252.1	45994.9	48435	41386.8	46921.2	48894.2	38213	40884.3	51940.3	91966.1	44639.3	43637.3	70648.9	38323	43307.3	37809.4
925	509.343	628.551	8218.79	8983.33	9820.41	8676.25	8670.45	8114.88	8638.38	19576.6	27995.8	14041.9	23256.5	26812.3	10112	23423	26394.4	35803	76968.2	40962.7	24045.5	35700.7	19708.1	28548.9	29744.6	12790.2	25393.4	18927	36087.2	48032.9	28350.9	22053.5	18381.2	16417.5	11314.8	8431.45	11322.5	9151.56	8600.95	10789.1	9865.14	12409.7	34039.8	7815	9461.02	13265	7686.72	7702.45	9801.87
926	509.376	738.447	8642.85	9098.01	10169.9	10752.1	10271.4	10984.5	10152.7	51270.5	69691.5	25557.3	49258.5	53245	61846.4	40546.9	73563.5	121091	272836	50604.1	21064.3	24119.6	31367.7	79458.3	40176.1	46936.9	54032.7	57543.7	66362.2	81280.8	20957.4	39767.5	57606.9	22785.1	19841.4	16070.8	18772.2	19989	15499.1	16425.7	14745	20775.5	23974.8	14255.5	19239.3	24983	17127.3	18871.2	16349.4
927	510.357	674.304	145254	149287	145141	142411	147429	143368	147111	707286	738597	424032	884279	697456	640807	991304	892211	1.34811e+06	4.55421e+06	871162	324974	424906	621952	1.01096e+06	997787	608395	818289	785769	950144	1.06689e+06	439816	811646	731992	414800	428403	355058	360664	336907	268746	388223	360786	463991	518352	318939	311894	388742	241241	287774	376949
928	510.392	736.297	22591.2	25906.4	24439.9	26886	25028.1	26146.8	24590	263948	401259	165816	245349	325507	257991	286307	372972	684293	1.52281e+06	305586	105972	60750.1	191443	448490	206044	260373	253634	296887	255657	490294	77048.1	191680	325290	73223.2	86001	77836.6	70040.7	88037.3	72604.5	79106.7	81753.1	85998	105004	68641	71305.4	119238	56771.7	72636	69789.6
929	511.359	674.251	43283.7	39647.7	42559.5	42541.8	41156.9	42017.6	43137.6	193210	202653	113756	237735	194060	176884	261455	242569	362656	1.20529e+06	240253	94550.1	127657	166982	269149	274331	164500	223434	220465	257673	295316	129500	226974	200026	114527	119894	101025	99363.2	97608.2	78401.8	110770	105699	127854	143202	87406.8	83181.5	106427	68707.2	81258.6	111332
930	511.288	599.842	106367	104741	98620.6	93712.5	90924.5	89529.8	87786.3	2665.24	4973.03	2310.39	3737.75	4689.15	2442.23	4444.81	4758.67	6685.78	9076.87	6008.01	12017.6	18251.1	519.611	7862.26	4604.41	4079.86	3610.5	4279.29	11373.2	5936.03	12662.1	6371.13	2994.27	605.874	512.759	257.378	707.766	258.048	3514.66	329.569	632.209	693.164	10647.6	601.081	789.243	1524.62	536.396	218.883	774.775
931	511.395	736.471	8937.18	8374.21	8449.74	9730.02	8915.88	8801.08	8706.31	73384.7	112874	45856.4	67331.3	87001.9	70613.1	83158	109109	188822	439424	85683.2	34904.6	18397.8	51695.7	123877	56426.7	71892.7	73061.4	85053.1	77407.5	130261	26568.7	56891.2	87736.2	20373.5	25345.8	25919.6	21263.2	27912.6	21452.3	23454.5	26578.8	22861.1	32214.9	21463.9	24505.2	37810.8	17950.5	22044.6	20024.1
932	512.331	485.408	25561.6	26241.3	26648.8	26740.9	26508.8	26012.3	27492.1	17286	21783	19076.9	29516.6	33656.8	21576.7	50369	33887.6	35572.4	92624.8	32649.1	115067	45886	36899.3	46688.7	46399.2	18475.9	38237.7	23352.5	52966.6	32965.6	39420.4	23919.4	25656.2	49312.8	37415.7	22821.4	22502.1	36171.1	21307.2	29919.2	32380.4	27779.9	64082.7	20169	39773	16143.2	37611	17518.5	21807.1
933	512.361	674.362	9187.24	8771.26	9763.84	8512.76	9189.18	8947.38	7765.47	37088.1	36608.8	21664.8	46840.5	35747	34083.9	48799.7	46393.6	67622.5	214528	46646	20591.1	28716.5	24439.4	50066.7	50539.8	34226.6	42908.2	42269.5	48338.4	53294.5	27764.9	44211.8	35769.2	21001.5	23958	19407.9	19383.8	17391.7	14058.2	21109.3	19630.4	23763.1	28512.1	17159.8	17405	21510.8	13478.9	15126.7	21472.7
934	512.287	597.966	31748.1	34728.5	31112	34184.6	30303.6	30360	28687.4	7947.39	10982.8	7130.39	8105.67	11539.2	7845.61	8891.23	9467.34	10946.1	58617.1	7413.15	8184.18	16702.9	5413.33	7002.44	8700.25	8638	12111.4	10320.4	25390.9	7197.99	14610.2	10001.7	10728.2	6268.05	7743.48	11517.3	5858.01	12953.5	10766.4	5917.35	6509.79	8514.55	10720.3	6335.69	3399.96	3618.59	6200.88	9029.89	7489.29
935	512.413	739.861	33797.6	44406	52742.6	53720.6	52682.4	53505.6	52369.4	50746.3	78085.1	42861.4	46821.1	56359	50745.1	67193.8	49087.4	63727.3	114236	41050.9	42890.1	35988.8	22930.9	51693.5	73160.5	58360	38922.4	37305.5	76203.3	44878.4	40321.6	37846.6	39506.6	35051.9	29649.4	32027.2	29307.3	31552.8	26842	25238.1	27867.8	25466.7	42337.8	27197	38709.4	31471.7	42455.8	30357	29649.5
936	512.464	843.457	9273.32	8327.9	11046.6	11368.3	10359	10981.3	10808	23066.7	18127.1	21516.5	31356.5	50504.1	37024	7481.17	56507.4	28110.8	368343	19207.2	27053.8	21219	11330	38470.7	3107.35	43797.7	38609.3	15265	80003.3	37069.8	25887.5	33674.3	34276	8876.77	8556.29	8645.73	8078.11	8184.52	8366.07	9375.03	8195.27	8573.83	35640.3	8197.87	7922.47	9165.16	10134	9526.25	9218.3
937	513.344	673.956	151730	151277	154162	153393	157555	150911	156806	21607.9	26013.5	10546.3	24343.7	25684.1	19450.3	24089	18564.7	26977.4	55452.1	24282.2	36970.2	54375.6	2958.67	22281.1	23637.5	19129.4	22632.1	23832.1	42261.3	26348.9	53708.7	25287.7	19494.6	5699.05	6866.88	4852.27	6387.07	5597.58	6478.39	5509.21	4743.09	7143.58	45759	4776.74	3729.93	5207.99	4538.37	4575.25	5270.94
938	513.344	813.966	46444.8	34693.3	45732.9	49737.2	48213.8	50003.4	49507.5	6823.8	9148.77	7181.4	8021.19	13087	7132.81	18402.3	34758.5	43031.1	132511	6665.57	9858.87	0	811.135	7135.96	0	6693.14	9936.63	6707.05	13825.3	6541.71	10447.2	7636.44	3624.19	7139.34	7744.66	8495.54	7721.29	6867.83	8364.11	6684.83	6893.02	7603.18	7207.9	8119.24	6932.1	8401.3	10122	9733.12	7275.96
939	513.389	774.15	20275.8	20461.8	21701	25578.3	25509.4	26552.2	23980.8	33356.8	62288.8	17038.9	39759.6	56008.4	33793.2	38804.7	44842.5	67246.4	102217	45868.7	101448	140683	24305.1	41457.8	5935.25	28990.9	33109.1	49020.7	105329	37951.8	95061.2	38679.8	38201	23821.2	20826.5	22653.2	23072.4	21562.3	24433.9	21252.9	20864.3	22808.6	87656.2	29666.7	25837	25675.8	25041.6	23745.2	22791.7
940	513.389	861.348	37126.2	39344.9	41841.5	43897.8	42013	42420.6	41734.4	57474.8	80061.5	27958.9	49917.8	136601	48383.7	84286.7	111789	209264	515656	59552.1	27646.5	39466.3	26161.9	52468.1	35416.7	55497	76096.2	42081.4	92080.9	27998.8	64509.9	38941.7	34450.2	44342.7	44121.7	51142.4	42307.7	38936.5	59647.9	44724.9	39837.7	63468.1	51513	60142.1	48041	55319.8	52542.4	60286.4	38265
941	514.369	668.004	102154	108943	104813	111658	106725	106587	111501	142089	237124	77805.9	176538	226252	149098	140509	158834	248259	313988	183815	477680	704645	128329	164206	173443	124467	136052	206806	456085	159345	485675	173769	181594	83967.7	66934.1	86333.6	76919.5	77376.5	81182.2	79177.7	58915.2	79669.4	426634	101208	87768.5	87115.6	82007.4	74950	76868.5
942	514.348	828.846	9903.62	9125.34	9608.23	10133.7	12398.7	10687.9	15142.1	4359.23	4221.71	2225.44	3048.34	6079.87	3743.62	8009.39	12353.6	13940.9	19884	3350.56	4127.46	0	460.12	4387.8	0	2211.23	2470.41	2392.83	7182.22	3494.91	1996.4	4055.71	1597.16	9176.44	9533.02	9902.34	9471.25	6594.36	11458.1	7692.13	7959.49	6508.43	4482.76	10732.3	10025.4	11716.7	13662.5	14238.3	9447.14
943	514.39	575.256	23761.6	23231.3	22535.7	22284.7	22920.1	24973.3	22526.6	39021.6	57865.5	24652.9	48990.5	57164.6	37820.5	40407.2	45013	63918.9	117073	52599.2	97622.8	171000	34636.8	46227	39082.7	35687.7	41287	47952.1	112291	45523.8	118938	47854.4	39814.4	24568.9	21051.1	22183.9	22987.8	18763.6	23845.9	18997.7	16351.9	20636.2	103411	24019.5	19625.9	21886.9	20942.4	20017.1	18588.9
944	514.707	704.478	7509.73	810.118	9716.89	7980.97	8405.38	7958.53	9253.44	15625.7	26894.5	8332.91	20065.6	27808.4	19036	17923.2	18749	27119.9	33352.2	15524.8	48406.1	75278.1	2894.36	18042.3	17476.1	13743.3	13854.5	21827.3	41121.8	16462.1	48827.9	24517.4	17751.4	9712.74	7699.21	9182.84	8204.73	9249.87	6968.69	6575.97	458.434	8933.52	40311	9036.55	8911.28	9677	9530.91	8992.98	9224.64
945	515.375	565.362	14140.7	14924.4	15599.7	16010.4	15020.4	16165.1	14993.6	30371.9	43192.3	18103.4	37210.6	43827.5	30866.4	33294.7	33772.2	46628.2	84653	36273.2	80647.2	122685	27914.5	36178.7	32388.5	28041	30968.3	38884.3	84809.9	34184.7	88683.6	37386	31200.1	16439.3	12082.6	13183.3	15199.5	11617.8	15923.2	11917.8	10548.3	12872.9	75838.8	16491.6	12604.2	13264.8	13646	14341.7	12689.6
946	515.352	651.333	42780.3	45052.7	43092.5	44921.7	46064.1	43376	45951.5	24046.6	38860.7	12701.6	27393.1	38661.4	24693.5	22979.9	25918	37827.2	54245.5	31017.1	90860.5	131526	22119.3	28504.9	28154.1	21578.8	24217.2	33254.3	78958.9	27044.4	85841.8	28195.5	31383.8	27838.7	24590.3	26067.5	26521.6	29135.9	26325.3	24735.1	21544.7	21814.4	77611.8	22897.8	27095.2	25590.3	23865.5	29653.1	25306.3
947	516.307	596.446	27770.3	29273.6	27958.8	26685.5	25667.4	25577.9	26856.3	268488	337557	298541	322718	418648	169940	337661	334808	549207	1.13207e+06	451914	155132	275561	149322	301499	362738	228037	311047	246954	276354	284390	193129	250185	213266	50905.5	33501.1	27909.2	34441.4	27410.9	31863.1	26838	20923	17454.1	251876	32980	26105	34584	31969.4	31012.2	28445.8
948	516.353	809.033	59995.5	51538.5	58700.6	61479.9	63519.6	62925	61722.5	4111.06	5975.16	2801.82	3586.62	5439.8	4186.01	10032.6	19009.5	19633.8	48814.8	3180.23	2188.92	633.262	215.298	5185.54	0	4583.45	7225.64	4266.35	8206.6	5211.43	4365.66	3916.61	3040.13	70960.3	49680.3	50838.9	79022.6	45737.2	88366.2	91008.7	78021.7	87791.7	2537.1	102900	74887	62916.4	86566.2	90993.4	66799.8
949	517.307	595.753	7963.57	7919.87	7151	8129.8	7189.99	7992.46	7628.85	71774.2	90527.2	81819.4	84708.1	111768	49446.4	90226.8	92511	150455	302752	122307	45464.9	77414.9	35623.6	82413.2	100786	59652.8	84693.8	67498.1	85609.8	72063.1	54908.6	68401.5	59498.3	15670.4	9868.26	9848.55	11283	8301.34	8773.93	7723.21	4987.85	4289.15	71197.2	7654.15	9255.2	8870.07	10702.9	8012.38	6055.54
950	517.338	646.557	27522.9	29552.8	29970.4	28687.9	29492.5	29165.3	26683.1	3693.92	5898.84	2589.43	3675.66	5893.78	3676.98	4103.04	2864.34	5278.33	5601.34	3866.2	14043.3	19033.5	0	3569.82	3736.59	3450.09	3101.72	5377.8	13049.6	3653.07	14812.1	5733.9	3225.61	399.781	423.03	250.133	1101.5	1251.29	852.357	463.759	818.63	101.874	13204.4	324.868	655.956	677.611	352.912	985.503	500.581
951	517.36	809.02	57662.6	23148.1	27450.4	29614.6	29104.5	30130.6	28163.7	7565.05	8251.17	9163.52	5427.97	13449	7052.06	20048.5	24481.7	31014.9	93978.3	12184.8	14920.6	2033.9	0	5233.85	0	7163.57	16556.1	8870.9	22491.8	9409.76	11881.6	7811.4	3426.41	27167	19661.4	21925.9	29334.8	17579.7	32861.5	30135.7	28338.7	31979.6	9345.15	35386.8	25741.5	25706	37759.2	35663.1	24610.5
952	518.323	639.736	580775	591555	610977	630168	629174	622332	632041	2.24153e+06	2.09857e+06	2.12684e+06	2.1784e+06	2.09453e+06	2.23583e+06	2.69889e+06	2.64135e+06	2.52547e+06	2.37814e+06	2.24208e+06	1.69402e+06	1.4744e+06	1.20915e+06	2.01155e+06	1.99888e+06	1.91185e+06	2.10918e+06	2.0064e+06	1.81983e+06	1.96564e+06	1.76284e+06	2.16974e+06	1.8058e+06	784108	810603	729749	745664	736695	723832	673146	673950	692164	1.76707e+06	710663	736190	671198	737269	802489	738254
953	518.325	586.586	98635.2	98582.3	97297.2	101742	100095	101565	101729	438792	508608	503021	428404	511762	428922	666900	522784	717979	2.15915e+06	488872	137885	258150	544261	420510	714341	314995	5932.96	308386	230897	300497	6631.02	394362	236424	150451	129942	213968	95772.1	77845.8	107215	80835.2	83618.4	90794.2	148732	102896	128448	151142	80052.8	118416	164736
954	518.37	822.631	157511	140711	156469	169853	168379	172284	172529	398769	588395	200157	347957	1.11186e+06	359979	478044	378569	1.05688e+06	4.31569e+06	447998	210720	241458	281675	598009	290984	378108	740664	276259	885989	206961	525604	333076	244465	194407	135062	143092	258941	120282	269739	243313	204121	275855	462623	284270	249916	228752	266559	234681	155420
955	519.326	639.565	155525	160118	164394	167799	169662	166958	170441	579752	537043	562375	561322	547559	571787	694781	685598	641289	605285	583739	438460	382977	309860	513494	510555	487830	543887	516354	472340	507033	451051	565086	462023	214856	224236	195883	195693	197253	191470	182382	180570	187308	460636	188458	196180	181327	197412	209038	196571
956	519.328	586.49	32061.5	30505.5	28392.2	31127.5	30589.1	30630.9	30311.1	124792	143934	144499	120186	143029	123303	187166	143367	196666	589389	137959	43143.5	78497.9	152287	121182	201470	90724.9	94704.1	88324.1	70492.5	87728.1	44984.4	111010	66894	45972.6	40553.3	63803.6	27721.1	24658.3	34430.4	23663	26460.8	27319.5	42365.1	30956.6	39944.6	46092.8	25828.3	37043.4	50119.5
957	519.38	822.464	93405.4	47474.3	56630.9	59186.2	59909.6	63150.9	61887.2	133757	182421	71016.4	109378	339784	114720	155963	139063	342772	1.36915e+06	148868	77838.1	79322.5	86350.4	183358	85702.6	116803	229345	89677.4	281919	71649.9	159079	110033	75651.2	66818.5	49304.1	51422.5	83326.1	40782.6	85390.6	78153.1	66005.4	83680.5	147139	89329.7	79898.5	76568.9	84892.5	76624	49991.9
958	520.039	646.12	966.159	894.446	834.283	857.941	679.356	1201.23	1056.64	21855.3	31175.6	12330.7	26815.1	36284.4	23162.9	20444.2	32222.8	37988.8	38452.1	30145.3	86625.6	141689	13920.1	23850.4	23373.4	22433.5	22948.9	30403	72845	23288.9	106795	38505.5	25996.2	1126.34	1143.93	576.397	339.763	1228.28	965.192	977.004	460.895	537.435	75481.4	533.542	887.361	269.493	227.82	769.553	537.563
959	520.346	617.321	9.74464e+06	9.69498e+06	9.71777e+06	9.92102e+06	9.92696e+06	9.77726e+06	9.97973e+06	3.05223e+07	2.62439e+07	2.97202e+07	2.70079e+07	3.12204e+07	2.53371e+07	2.92268e+07	3.51017e+07	3.3895e+07	5.20469e+07	3.25709e+07	1.38893e+07	1.51955e+07	2.6564e+07	3.0322e+07	2.87346e+07	2.31993e+07	3.51354e+07	2.68745e+07	2.49961e+07	2.83182e+07	1.08289e+07	2.83113e+07	2.50586e+07	1.42059e+07	1.39803e+07	1.20262e+07	1.43166e+07	1.0957e+07	1.35918e+07	8.84992e+06	9.69995e+06	1.12782e+07	1.59003e+07	1.18276e+07	1.57104e+07	1.42033e+07	1.254e+07	1.30245e+07	1.2509e+07
960	521.348	617.321	2.69004e+06	2.67271e+06	2.68842e+06	2.7422e+06	2.73045e+06	2.6982e+06	2.7575e+06	9.33572e+06	7.77518e+06	8.98459e+06	8.07597e+06	9.55214e+06	7.51935e+06	8.93118e+06	1.09742e+07	1.04658e+07	1.76767e+07	9.97662e+06	3.92705e+06	4.32661e+06	7.84675e+06	9.14313e+06	8.55936e+06	6.73283e+06	1.09354e+07	8.05038e+06	7.52638e+06	8.47533e+06	3.04517e+06	8.55688e+06	7.35544e+06	3.92577e+06	3.86307e+06	3.32928e+06	3.95691e+06	3.03208e+06	3.77466e+06	2.42205e+06	2.69287e+06	3.11909e+06	4.56231e+06	3.27815e+06	4.34409e+06	3.93059e+06	3.46675e+06	3.58544e+06	3.49323e+06
961	521.385	700.443	76649.6	78811.8	78498.8	82815.1	81676.4	81429.6	84234	60276.8	255861	37122.3	178202	257065	67014.7	68516.4	81459.8	278882	158301	84304.6	461051	673018	139683	70868.1	80580.5	53520.2	69709.2	88015	444081	74871.2	461321	185968	79083.5	76993.3	60464.8	77742	78460.2	74280.4	77367.3	71395.1	53949.8	76714.9	409006	95808.5	83151	85668.2	80217.3	71706.1	72328.9
962	521.418	818.341	125750	48990.4	59361.6	70383.7	70034.6	76556.5	75771.1	24496.3	43587.6	17622.3	16109	31918.8	16782.5	26165.6	40751.9	283424	823543	27014.9	129860	88470.5	4188.61	12469.2	51569.1	17626.6	25332.7	15912.9	48163.4	16460.7	81754	17053.7	10008.5	66859.6	64650.6	77600.1	48960.9	42121.3	62188.5	34777.8	54000	27384.3	126830	57401.7	39966.9	66401.3	110742	87850.5	52263
963	522.361	659.576	4.59893e+06	4.57206e+06	4.69399e+06	4.70803e+06	4.69805e+06	4.72136e+06	4.74161e+06	1.44305e+07	1.81548e+07	1.30298e+07	1.37984e+07	1.93326e+07	1.13558e+07	1.551e+07	1.90888e+07	2.32185e+07	3.85198e+07	1.65788e+07	5.20473e+06	7.68293e+06	1.63775e+07	1.60912e+07	1.93105e+07	1.22521e+07	1.69829e+07	1.22546e+07	1.42871e+07	1.42921e+07	5.86495e+06	1.40788e+07	1.21746e+07	7.36075e+06	5.62284e+06	5.11624e+06	6.77768e+06	4.78431e+06	5.36668e+06	5.09398e+06	3.8795e+06	5.39703e+06	8.27074e+06	4.90835e+06	5.63381e+06	6.44799e+06	5.27121e+06	5.90516e+06	5.63781e+06
964	522.347	617.079	457866	437634	469174	461431	458353	452510	471863	1.20653e+06	1.38349e+06	1.1757e+06	1.30278e+06	1.40952e+06	1.23016e+06	1.32873e+06	1.50382e+06	1.10509e+06	1.72627e+06	1.19183e+06	722066	773145	1.25611e+06	1.16521e+06	1.17767e+06	891085	1.33441e+06	1.16457e+06	1.1905e+06	1.24769e+06	534427	1.53527e+06	1.19382e+06	681450	679323	558194	687964	527184	663372	412135	463482	541644	829909	552932	744234	688650	594614	629963	591044
965	523.362	659.589	1.2813e+06	1.27955e+06	1.2963e+06	1.32695e+06	1.31074e+06	1.2982e+06	1.32258e+06	4.02718e+06	5.08278e+06	3.63687e+06	3.84647e+06	5.45445e+06	3.15544e+06	4.3923e+06	5.41493e+06	6.60967e+06	1.16056e+07	4.64545e+06	1.46235e+06	2.11284e+06	4.54784e+06	4.47556e+06	5.43067e+06	3.42056e+06	4.75249e+06	3.41913e+06	3.97208e+06	3.98843e+06	1.63067e+06	3.90874e+06	3.3936e+06	2.02071e+06	1.544e+06	1.41744e+06	1.88905e+06	1.3317e+06	1.49572e+06	1.42407e+06	1.07455e+06	1.5032e+06	2.2787e+06	1.37059e+06	1.55828e+06	1.78807e+06	1.4719e+06	1.62554e+06	1.54859e+06
966	523.347	616.759	53091.4	49672.4	53237.5	56039.9	57851.9	49933.2	67654.6	115283	137427	133860	95906	127515	87209.8	135616	114270	132489	183795	123706	66848.1	58728.5	159723	118789	124119	89208.3	122867	113865	109413	93230.2	50745.7	177356	126017	70480.2	69864.9	57733.3	86448	55057.3	68734.6	49811.3	50516.3	58461.3	71521.6	60517.8	79404.1	65128	61830	68665.6	75541
967	523.325	830.661	36710.7	34254.6	45765.3	56266.6	51881	108753	110481	134017	217778	60944.2	121873	400279	124564	342014	305407	721997	1.52297e+06	124889	70658.4	51858	49707.4	176053	48224.4	99317.3	212896	69806.5	259129	67843.4	158396	115681	64300.2	58390.9	42616.6	45211.6	81413.5	38908.2	82262.5	80502.8	59033.2	89559.8	147730	85513.7	76221.8	76540.2	97040.3	80270.5	49924.1
968	524.377	714.762	3.69414e+06	3.67234e+06	3.84645e+06	3.8884e+06	3.87374e+06	3.88912e+06	3.91829e+06	1.35293e+07	1.95742e+07	1.75719e+07	1.88727e+07	1.92044e+07	1.34235e+07	2.00361e+07	2.16645e+07	2.68284e+07	4.51693e+07	1.72092e+07	6.53325e+06	7.81924e+06	1.44711e+07	1.89148e+07	2.05586e+07	1.42478e+07	1.85819e+07	1.70898e+07	1.36224e+07	2.05413e+07	7.17723e+06	1.72497e+07	1.42485e+07	1.22081e+07	1.10859e+07	1.04299e+07	8.50014e+06	8.23053e+06	1.0045e+07	8.07972e+06	8.13724e+06	7.68915e+06	9.22033e+06	8.76498e+06	9.6594e+06	8.87512e+06	7.52479e+06	9.53359e+06	1.01234e+07
969	524.3	641.584	65116.9	60223.9	57258.9	60479.4	62284	59221.1	59203.8	4119.86	4273.57	3213.46	3796.73	4299.51	2383.19	2694.17	3489.38	5636.05	4376.82	3346.5	1776.35	1403.26	15694.2	3314.02	4131.43	3011.63	3375.46	3009.63	739617	3188.23	1190.46	2928.68	2276.07	71265.9	73863.9	66865.3	67541.4	65551.7	64981.4	58939.5	61899.7	60688.6	1692.42	67946.6	67346.1	60820.9	67141.7	74050.8	67600.1
970	525.379	714.975	1.04927e+06	1.03493e+06	1.08306e+06	1.09692e+06	1.1069e+06	1.09339e+06	1.09705e+06	3.82232e+06	5.63495e+06	5.0123e+06	5.45985e+06	5.48672e+06	3.77615e+06	5.80625e+06	6.31847e+06	7.75976e+06	1.42179e+07	4.88613e+06	1.82545e+06	2.19891e+06	4.0831e+06	5.42058e+06	5.91428e+06	4.03056e+06	5.33925e+06	4.9155e+06	3.85508e+06	5.9237e+06	2.01778e+06	4.92124e+06	4.04104e+06	3.35838e+06	3.06427e+06	2.86115e+06	2.36035e+06	2.27299e+06	2.78558e+06	2.2358e+06	2.23601e+06	2.12386e+06	2.5912e+06	2.43331e+06	2.66321e+06	2.44978e+06	2.08864e+06	2.61147e+06	2.79677e+06
971	525.304	625.801	159663	160253	172180	178811	173670	175873	173383	366.003	0	0	0	0	0	321.605	363.079	0	0	127.318	770.187	214.904	0	0	110.542	123.829	125.282	368.224	176.075	254.878	864.941	363.336	0	36742.7	41285	35386.2	35683.8	35727.5	33772.5	33051.3	30556.8	30485.3	241.82	35266.4	36776.9	36537.2	35153.8	38618.4	36773
972	526.299	618.343	128524	124617	126474	127872	128310	126180	126809	49425.5	74026.4	63656	94960.3	62589.7	101323	67096	59345	86568.5	240313	141896	74020	73822.9	58981.8	72694.4	109714	95663.9	80547.3	117489	77587	81509.7	80005.7	72586.5	82718.5	95871.8	88357.6	68934.2	69564.7	107176	69600.1	88065.6	75016.5	120216	68564.5	66049	86466.3	79116.4	79919.6	58481.5	67275.1
973	526.379	714.762	194833	184929	202974	197745	202028	201009	202042	703358	1.02158e+06	901186	983009	982800	679036	1.04386e+06	1.15189e+06	1.39289e+06	2.53114e+06	883826	334758	401786	734289	986840	1.06419e+06	733595	970916	889898	707135	1.0762e+06	368307	899370	742104	606329	541688	517600	429681	403623	505417	403269	392040	379185	478175	433824	471302	433633	374173	462812	498648
974	527.38	714.219	28385.5	41687.8	31519.3	30103.2	40046.6	44225.1	30387.7	93394.1	144246	122155	139255	137186	96208.6	142566	155455	194577	358272	119829	49912.3	59035.9	92980.4	134001	147047	101329	130801	121425	102924	145742	52459.2	122881	99353.4	86383.2	81506.8	74421.4	65296.6	57870.6	72474.3	58074.2	59997.9	54251.5	66832.4	64512.1	69104	62157.7	49401.3	68946.1	72043.3
975	527.3	616.312	36988	36752.7	36129.5	33945.7	36775.5	37009.8	36472.9	7696.41	14051.4	12252.5	22003.2	10733.8	22961.2	14206.8	8615.19	12776.5	56203.6	34731.6	19727.2	19783.8	7789.2	13239.8	19111	22451.3	15957.8	25745.9	19206.2	18097.2	24394.3	13584.3	16084.7	29651.4	27774.8	19113.9	19314.2	31524.3	20327.1	27774.4	22570.9	35515.3	17462.2	17203.8	22975.1	22747.2	23738.5	14328.1	17734.3
976	528.393	721.992	53300.7	55338.6	56211.8	60850.5	61084.4	58682.3	62073.9	118523	181096	67345.4	133378	180782	115228	111496	142212	203484	280377	140804	314902	468966	102598	127291	138361	99146.2	116076	149069	315162	127521	319850	136849	132777	55541.9	50338.2	60566	56077.6	50774	58422.6	54141.4	39931.5	54363.2	285909	69579.9	65320.6	62748.6	60184.8	56451.1	55069.4
977	528.366	627.487	30191.2	26812.4	27365.8	26501.6	25451.3	25335.9	25802	22664.9	37633.3	16820.3	27729.9	37697.9	20174.6	18573.2	22849.3	32942.7	93885.3	25201.7	94029.9	156863	14707.6	22612.8	20043	17161.4	16261.4	29807.1	97173.9	21241.6	108798	20760.5	28359.9	24744.6	22345.6	25904.4	20976.6	22550.5	20665.1	22161.3	16306.5	25247.8	96654.8	24925.8	21935	22195.6	16906.3	22441.4	19205.1
978	529.384	613.456	53417.5	54311.1	55260.9	52967.4	57079.6	56098.4	54378.9	86736	158625	49277.1	104846	153401	91658.1	89666.1	110765	154563	224984	122608	324768	467869	85497.2	102921	112648	79228.3	86994.4	130494	291844	99322	331200	112483	115511	49713.2	36688.4	44491.2	43317.7	43033.1	42843.6	44447.9	31931.5	43180.2	286752	57697.5	48864.5	45477.5	45462.8	43866.3	41650.6
979	529.339	579.893	16978.7	15768.1	16008.2	16451.1	15677.2	16043.4	14395.1	8736.75	8320.87	6169.94	7842.24	9675.77	7398.43	7825.58	7574.06	9084.97	17268.8	6908.96	15831.8	26855.1	2060.8	7457.13	6626.9	6939.3	9001.01	7383.23	19136.4	7061.74	22967.2	10345.1	6510.14	3273.28	3376.92	3223.31	3107.86	3584.12	4298.46	2509.85	1923.21	2297.81	18553.9	3400.31	1880.53	9000.91	2288.21	1776.6	2807.61
980	530.357	676.226	25026.8	15130.9	14185.5	15376.2	14620.8	14201.9	14126.2	120973	223013	118728	122045	183682	129142	201528	221482	326432	436490	159630	70352.4	62055.7	51422.9	158813	105753	104216	139313	114613	150436	158274	67646.4	110453	122016	23130.4	17224	17773.1	15888.2	15324.8	16745.4	14513.6	13179.8	16209.2	81554.4	15271.6	14386.6	22074.1	13490.6	18109.6	13335.4
981	530.369	831.229	306576	266167	339209	349131	339112	334603	340411	95843.2	138590	45456.5	87292.5	235739	80560	108940	88607.8	234856	938788	100315	39535.3	67480.7	52226	96974.6	69273.4	91013.9	144378	72575.4	159543	43741.4	106764	66286.8	63141.8	30068.8	24663	24130	38260.4	19438.9	42474.7	37500.4	27884.3	42827.9	89917	43197.2	38671.3	38288.6	42151.6	39411.2	24329.8
982	531.012	36.5483	10176.2	10317.4	9765.33	10540.4	11105.8	11032.7	10337.7	13131.5	13633.5	16715.9	13653	14766.5	9266.1	19059.8	16405.2	18399.6	14776.9	15826.4	17022.7	21319.6	10958.4	11709	11537	10989.6	19382.1	15239.4	25392.2	14570	18221.7	13993.5	9317.93	9186.42	9785.19	10566.1	9458.21	8035.38	12718.8	10034.5	9117.98	10236.2	20738.4	9122.02	11225.7	8554.22	8590.22	9696.93	12423.9
983	531.355	673.997	244507	241453	234422	235815	238846	231847	233589	37340.3	66601.3	35508.9	36532.7	54702.8	39292.7	60895.5	66642.2	94539	129608	47375.2	25078	17793.1	12000.1	45614.7	33364.3	31812.2	43788.2	34657.2	48115.8	48637.2	25011.2	35646.8	37016.8	8231.12	5970.33	6158.92	4769.52	4529.51	5821.03	4826.67	3887.79	6039.95	25565	5250.85	5441.74	6527.7	4750.21	7089.49	5752.77
984	531.372	813.952	165153	131267	168129	176072	171512	173080	175738	43285.6	55957.5	54413.3	99929.4	56680.6	44817.6	90259.5	204444	292256	514552	59063.3	24866.1	18710.9	31087.3	51507.5	21937.6	30750.7	48709.7	43259.7	182874	60858.8	46061.7	27524	70904	61835.2	10683.5	7807.7	17315	80088.2	59542	61842	61292.4	17134	22324.6	80227.3	17163	71689.3	7226.74	65400.5	13356.2
985	532.347	673.826	87204.2	87899.6	88973.3	84671.2	85355.1	82999.7	84513.4	186839	211434	118860	238887	199352	177820	331815	295514	408560	707213	222644	100936	111080	67920.3	218520	220818	139211	199553	180359	228972	236563	128043	213376	160267	39528.4	39362.8	35468.9	32496.7	33237.3	27369.5	37935.8	32124.1	41216.4	143245	30888.4	30227.7	35604.1	25021	28746.2	34575
986	532.375	735.843	9127.28	9054.99	12473.3	11834.2	10678.8	10856.8	11820.9	50034.8	100982	32208.2	47134.4	68744.2	49178.2	89044.6	125797	197436	326024	52460	23834.3	11492.8	17499.4	74313.6	22644	43946.7	47286.6	53928.7	54052.6	79381.3	20353.4	38940.9	53532.8	10889.2	11813.6	11763.4	8457.72	10394	10411.5	9237.33	9599.18	10609.1	22073.5	8076.13	8674.25	13572.1	7995.79	10160	8485.01
987	532.377	814.024	26127.2	22458.3	28306.4	30682.9	30235.5	31119.1	30512.6	3981.07	4642.23	2165.26	34326.2	33938.9	3266.6	54543.5	76842.2	106834	190933	2471.58	3505.89	0	449.753	3772.55	0	1843.79	6282.59	2906.7	70792.7	3503.95	6673.47	2776.4	3157.25	23225.9	25293.3	4035.57	19813.8	30876	22806.3	25691.2	22480.6	25910.8	3745.18	30106.2	5590.36	27667.3	7107.7	25786.3	22709
988	533.353	674.218	22495.8	22743.1	21857.6	20050.1	22790.9	19085.6	22688.3	53948.1	59163.2	34914.2	67309.3	55063.3	50688.1	93398.7	86932.1	113657	195594	64492.9	46048.6	61335.1	14604.2	59406	62079.9	40445	58172.7	53815.2	69951.5	67164.3	57214.1	63524.5	44643.6	15275.4	15375.3	15229.2	13225.5	13581.3	11954.8	12480.9	12781	15033.7	47034.7	14721.8	13313.3	14549.6	10624.3	12076.7	14262.8
989	533.195	824.594	31461.6	14151.6	23816	27466.4	25570.7	26642.3	25743.6	32112.6	29531.1	21474.5	60348.8	39182	30651.8	114753	136341	75486.5	189451	15171.6	12762.3	53571.2	18494.3	40655.7	20285.8	63004.3	54326.2	55930	133065	94117.4	37354	84374.3	26168.4	28656.7	50811.3	43146.6	31186.5	35330.7	15352.3	16818	14612.9	19804.4	43971.9	21417.7	11435.1	27649.9	11083.7	18289.4	21001.9
990	533.719	746.507	10881.7	12420.3	10881.3	13124.4	13841.3	13027.8	10910.2	21568.2	35802.3	12074.1	27423.3	34127.8	23346.6	9316.63	11895.9	14644.6	21031.4	24044.3	62336	106609	0	7707.41	22702.7	18674.7	21391	26555.9	62831.8	24327.6	80936.1	34867.8	23110.9	13955.8	11745.6	12916.4	9580.97	13246.4	9230.98	12033.1	8696.61	12063.3	55841.3	16082.4	13006.9	12993.3	11519.4	12543.6	11159.8
991	534.196	824.893	10480.9	239.231	0	9243.34	8278.82	9037.91	8896.85	11168.8	10084.4	7612.21	21214.6	13140.8	11179.7	38808	45830.3	26119.8	65567.9	6011.12	4289.22	18385.5	5842.73	14740.7	5684.39	22132	19000.3	19950	45262.5	32376.7	11775.8	31421.1	8866.02	10157.8	19875.3	15918.6	10787.2	11229.8	97.4045	397.032	515.81	126.376	14330.5	0	360.72	9405.24	125.38	104.752	145.021
992	534.347	643.723	38767.7	41259.1	41887.1	40691.1	41789.7	41505.3	41192.9	70426.3	78751.1	60587.2	66562.1	82901.6	63272.7	69578.9	80753.7	82719.6	105391	75001.4	124871	209252	43910.6	63788.2	60616.8	54356.3	60870.8	65165.7	125517	65174.8	156558	79083.3	56437.7	37999.8	39340.4	56287.4	36149.1	38083.6	34383.2	35257.8	35207.2	36322.2	110828	36716.2	38444.5	30195.5	35244	37455.8	37987.8
993	534.372	706.351	10885.8	11053.1	10938.6	10441.8	9947.2	9836.52	10770.9	23574.4	39969.5	17646.7	23435.5	42030.8	31988.4	27114.2	41985.1	54304.7	123417	43427.9	33902.7	50242.3	15974.7	40397.3	20890.2	29973.4	38223.1	32518.3	29524.9	35079	39644.3	24352.4	30830.1	8921.31	6137.26	6897.11	6461.41	4478.98	6243.19	7129.29	5127.86	4518.57	17795.8	6223.15	6605.26	7913.28	4619.27	4848.96	5763.3
994	534.887	692.247	13923	11737.4	14526.4	13747.2	12123.6	13484.9	13111.1	19857.7	31204.5	11191.4	23111.7	32757.9	20520.4	18402.1	24051.3	33631.8	50340.1	23984.8	55576.3	79820	4432.46	21615.4	22768.1	16830	17476.6	25212.8	53535	18650.4	54519.4	23694.3	22294.9	16422.5	12137.5	14170.7	15190	19519.9	15223.3	14955.4	9948.52	16540.4	49059.8	16964.7	16417.8	16945.5	15877.1	12161.8	13062.2
995	535.322	824.398	73717.4	42909.8	60831.7	75968.7	84082.2	86919.8	89515	4909.22	5334.7	3538.7	8300.78	7427.71	5474.02	22235	24412.4	23022.1	47086.1	2577.15	2960.53	6259.43	1917.44	6723.49	0	9943.2	7859.13	7993.77	19241.5	13638	5746.8	12660.8	4529.63	3433.74	6916.28	6864.25	4858.69	2876.72	5499.28	3791.03	3630.34	5128.44	6276.61	4329.48	4409.2	4492.03	5849.47	4786.76	3398.63
996	535.291	581.78	29717.6	29180.9	26806.5	28389.9	25101.6	27216.7	25730.1	25363.3	20385.7	20538.4	21498	16467.7	18754.2	21563.5	24741.9	17706	39246.5	19422.4	32282.3	33690.6	5218.69	17647.7	18001.5	17294.1	21887	19870.8	30230	11504.9	26679.8	20604.3	12440	10263.2	8577.79	3678.42	7996.54	12344.4	9418.07	8776.89	9871.04	10780.3	31253.4	10216.9	2589.07	10018.6	1815.43	10398.9	7600.98
997	535.4	761.83	32753.3	36833.5	40423.3	43784.6	33996.9	34925.4	35928.9	61515.3	96470.2	34110.7	68692.7	98569.5	58598.6	63083.1	75889.1	117439	184597	74856.7	161700	237876	46570.1	68561	48536.6	49905	67308.4	76166.8	177679	69420.2	161885	68705.2	68485.6	41339.2	37998.6	41631	36413.5	34624.8	42222.7	33694.3	28920.5	34735.4	146580	44017.1	38553.1	41652.9	63440.3	39619.7	37652.7
998	535.4	859.392	45901	47021.6	48791.4	54341.1	51977	52120.4	54387.8	33522.3	52061.3	12481.1	34670.7	75946.3	27705.1	57126.3	58114.9	123319	290149	32297.1	12852.1	18188.1	0	18492.2	13622.6	25653.8	41949	20443.8	43133.7	14941	32046.1	23655.6	17201.9	54974.5	58617.8	62803.3	51046.7	51601.7	45751.4	52074.3	45687.5	50130.1	31630.2	48667.8	60447.5	44141.1	63949.7	46779.2	45493
999	536.39	644.882	83000.9	80571.1	86811.7	84955.4	84785.2	85542.8	86745.5	145241	230620	81757.3	170633	231907	149445	137820	165035	236061	292515	185234	468681	686566	138338	164617	173134	129117	139416	198896	426643	159365	474723	179829	180135	85938.9	69159.4	86253.9	80789.4	77526.1	80133	78924.1	58703.7	76423.6	410961	99100.4	87962.5	86574.4	82320.5	78251.5	77845
1000	536.406	752.2	15933	18669.9	20412.5	19595.9	19233.1	18778.3	20133.8	51176.5	77014.6	26758.2	48976.8	65799	50548.7	63600.1	65504.1	98817.5	187657	61391.2	47268.4	57320.8	41156	82640.8	27153.1	54598.4	52192.3	60606.8	72702.5	61437.1	49506.7	48030.8	52026.6	23717.9	20709	21703.3	19535.5	18726.6	19993.7	19096.6	17752.2	18918.9	56174.1	20799.8	7395.96	26213.6	21112.2	6888.46	19427
1001	536.332	822.329	26516.3	15929.1	23208.2	26278.2	28190.6	30034.4	31028.4	9050.04	11694.2	7427.61	9356.86	10522.5	10377.3	20155.1	25760.7	8571.94	581253	9043.11	51875.1	31690.2	3829.82	13321	0	9474.57	17650.5	10514.7	137061	8342.8	20959.1	10453.9	7408.33	7858.09	6820.73	7131.11	6290.64	5747.3	7418.85	4815.07	5665.46	5268.35	44223.8	6210	6556.18	7553.04	10411.2	7645.23	6578.44
1002	537.264	402.59	10706.8	11818.5	10538.1	9785.23	11441.3	10430.3	10161.8	0	241.587	109.21	0	235.611	115.708	118.335	0	0	429.109	128.969	511.114	333.652	0	0	0	0	248.925	111.787	400.013	129.661	107.012	252.867	0	167.757	294.474	0	0	117.935	220.776	169.433	0	0	260.281	0	137.843	108.649	103.322	0	0
1003	537.391	661.968	18977.4	18967.4	21197.3	18878.2	19764.7	20245	20527.2	24497.1	40098.1	8393.48	28570.1	39439.6	26860.3	25800.6	29107.5	40926.4	22775	32503.6	101724	151118	16216.2	26859.3	26149.8	19131.6	23439	35893	84867.6	26557.8	100917	33067.4	31011.2	30814.9	18609.5	18943.4	25553.8	19769.1	20744.6	18394.4	14287.6	24690.9	88531.9	23651.8	21859.4	18633.7	19747.9	19016.4	16692.4
1004	537.341	733.157	7464	7830.05	9340.48	9801.48	9211.6	10511.1	10953.2	11769.8	21390.5	766.443	0	15860.7	423.773	19703.6	4520.03	26691.6	51450.4	14441.5	3362.02	2903.71	0	21439.2	336.457	12259.4	13147	13300.3	3722.05	16880.1	3187.47	619.295	315.865	6091.78	4985.22	6137.15	4999.88	4554.65	3975.75	5096.29	4270.59	4714.18	650.549	6443.39	5500.64	6000.98	4543.83	4232.62	4685.44
1005	537.536	837.31	30450.9	17889.7	23045.5	23027.3	21191	24298.7	24422.4	206356	200554	173332	187102	155013	128036	240410	215273	164764	291114	123748	224254	100420	56530.7	143279	106417	135740	1.0431e+06	154106	160619	159244	142616	211731	127958	21439	21164.9	19138.2	21711.6	20229	19680	18724.8	21618.3	17939.4	213901	21664.2	22090.7	18729.8	20292.9	21473	22358.8
1006	538.388	754.331	11541.4	11534.5	12080.1	13273.8	14188.2	12898.8	13917.4	72191.2	106776	63295.5	88380	99050.1	75107.8	117429	107052	152462	536729	117124	68079.5	102009	64874.6	99236.5	69065.4	66646.9	98766.7	90548	136670	159588	73115.6	91636.3	80112.6	66732	41957.6	42646.6	34511.9	38782.6	34679.5	36081.7	35098	45377.5	83729.5	33075.3	39884.8	37728.1	27403	36406.4	34443.7
1007	538.518	836.653	7032.77	8103.82	12691.7	13285.9	13655.7	12603.6	12728.8	88819.5	97238.4	74147.1	80447.6	83034.6	69275.7	101874	93228.3	92889.2	256743	64982.7	91607.6	40856.1	23815.3	73879	73317.4	67803.5	394035	73913.2	65797.2	79601.7	63185	94801.2	59243.6	11060.2	10236.4	11068.8	10342.6	9932.92	9487.05	8808.8	10416.1	8993.99	89119.4	10006.5	10323.6	9950.55	13282.2	12296.6	11827.4
1008	538.8	38.4685	5961.9	5343.89	6734.54	6703	6676.5	5473.81	5642.41	10281	11361.5	10656.4	10882.2	11608.1	9930.73	12828.6	11016.5	11193.5	12064.1	9796.56	9382.97	11069.5	9508.38	10287	9887.46	9378.26	11091.4	9334.18	10248	9758.07	10329.1	10201.6	7759.2	6716.24	7078.89	6456.58	6133.51	5586.2	5320.27	5077.53	5232.02	6761.16	10588.8	5127.75	6006.56	8050.74	5385.86	5547.83	4445.44
1009	539.321	650.647	37884.6	36426.6	42172.3	44824	40416.9	43277.4	41990.3	14102.6	31007.9	5053.22	22769.9	25118.4	17647.7	15165.6	22558.6	25691.4	23783.4	24725.5	64403	106960	31953.3	49449.3	20302.7	20019	12565.8	28416.7	60017.3	17948.7	83260	35146	51154.4	3005.34	2774.58	2976.55	2503.44	4664.13	3763.53	2662.05	2695.46	2947.43	61569	4322.72	4539.24	2842.67	3476.47	2782.24	3927.18
1010	539.325	703.508	9770.38	11211.1	12304.8	23562.9	12038.9	25187.8	24038.7	1720.25	1889.41	835.133	1716.36	2668.9	608.835	1390.08	2664.18	3523.38	5978.02	3028.11	3953.92	6560.51	0	2048.27	1688.56	1285.34	611.718	1959.32	4690.51	1866.99	5164.41	1854.15	996.824	8672.29	6098.66	6937.81	8490.1	8026.62	7024.74	7325.56	15812.1	7735.29	3230.59	10018.3	8331.38	25913.7	6981.68	8955.51	6679.18
1011	539.391	754.238	3659.52	3960.92	5337.67	5233.53	6044.48	6104.28	4823.08	18714.1	32418.1	15899.8	23842.5	26101.3	19623	36162.7	32262.4	45179	156138	30516.9	14851.3	23720	11917.4	29293	11564.9	18044.5	25975.6	22502	38694	45440.9	18405.1	23497.3	18440.3	20851.1	13519.6	13156.9	8806.08	9059.78	8672.12	8238.46	7185.5	7077.92	20865	10481.1	9975.9	9951.25	7547.21	9483.31	8055.83
1012	540.307	588.131	8339.11	9495.12	8306.42	7253.37	7998.79	8808.25	8945.84	129020	151028	153629	134599	161061	138757	182874	169362	210517	461790	142704	43153.6	104237	103462	127904	210659	100799	150765	110351	79415.8	93406.3	63725.7	140250	80984.8	12504.3	10293.8	20768.6	8131.97	5686.11	8995.28	6439.87	6477.39	7590.78	47923.9	7862.02	18021.1	12416.6	12018.5	9221.95	12933
1013	540.447	820.846	51722.6	64097.6	75433.1	77562.4	79189.4	76772.5	78442.9	78694.2	102114	77077.7	73282.3	76494.5	70971.3	120810	91317.9	88596.3	159755	282694	72977.1	51934.3	53712.2	65045.5	72474.4	108623	70216.7	68352.3	93420.7	74015	64820.2	67027.6	62642.5	56966.4	54110.4	57886	52941.6	52837.2	52773.2	48798.2	48683.4	46557.2	68401.3	48787.4	64222	51764	71429.6	60084.2	55174.9
1014	541.31	586.999	3718.9	4268.88	3300.37	4897.56	3816.75	4025.49	4842.58	36660.1	43909.6	45242.7	40500.2	49100.9	40550.2	51988.5	48451.2	62804.6	131025	43979	16049.9	34120.5	28336	37575	61839.2	29161	44187.2	32061.3	26522.9	29559.1	21544.2	41815.1	23454.2	5367.88	4684.12	6983.7	4123.42	2760.27	3919.9	2064.2	2057.39	4199.58	16244.7	4078.07	4945.91	4592.49	3735.21	3572.86	4210.07
1015	541.372	716.759	11145.7	11274.3	11877.8	11057.3	11856.5	11561.4	12039.5	590.944	2929.1	698.424	682.416	1345.81	1117.22	3953.73	1551.06	3644.76	2566.2	324.162	1614.91	2062.07	0	2254.92	958.896	171.615	384.602	560.286	3666.26	1729.88	1780.94	1176.81	377.168	1241.09	371.42	343.768	498.806	852.035	1561.04	480.148	507.153	698.239	217.519	400.081	430.596	510.547	733.002	341.483	648.747
1016	541.447	814.893	25028	23316.3	27369.9	31460.6	30375.7	36040.3	36035.8	30510.7	35261.2	26801.3	25482.1	48027.5	24481	39744.7	43989	45711	145542	105966	27591.6	9948.93	18383.2	24496.5	9658.54	35741.1	29427.4	21823.1	37618.8	29573.1	22143.1	23134.8	21885.5	24434.4	21440.5	22875	21861.3	20017.9	20494.8	17223.1	19498.1	18362.6	25694.4	19049.2	24343.6	21779.9	29700.1	26776.9	21448.6
1017	542.322	618.347	436594	434232	453989	457808	453887	449503	464936	1.82643e+06	2.46837e+06	1.81544e+06	2.23742e+06	1.6506e+06	1.53964e+06	3.09562e+06	3.1061e+06	1.66164e+06	1.57707e+06	999079	1.17155e+06	1.11502e+06	1.69988e+06	1.43586e+06	1.37091e+06	1.34637e+06	2.63907e+06	2.08921e+06	2.678e+06	1.39571e+06	1.05662e+06	2.20874e+06	1.91518e+06	527073	512933	486346	525941	447194	504783	368293	354362	444728	893938	476893	557350	455939	494379	512118	487279
1018	542.411	802.771	15010.2	16257.4	18555.2	22488.8	20697.1	21349.6	22713.4	23000.8	33530	17446.5	25545.7	34630.3	23992.2	31749.7	30843	45019.4	68120	27281.9	60537.4	65364.2	13507.6	27179.6	0	21247.4	25345	30783.9	60683.6	26782.6	53769.8	27878.3	24940.7	17321.5	13992.3	16978.7	17490.6	13790.9	16344	15488.2	12672.4	15277.2	54391.7	18533	17950.6	17203.9	19228.1	16313.2	15426.1
1019	543.326	618.347	125845	125225	130064	130054	135233	134777	133578	517097	724103	508123	654133	652497	441628	896758	908642	459930	438664	488701	339925	329845	488788	396702	388903	375266	770478	611007	441487	402121	310793	641207	549483	152303	155727	139990	152614	125474	148871	108504	99854.3	130842	255662	139494	166031	125911	145095	149375	140475
1020	543.399	677.703	87847.2	88959.9	89303.2	93504.5	92869.1	92202.8	91780.9	172035	270740	102152	202280	279115	177824	164896	205396	296592	438534	226900	521308	776345	157217	193137	203128	147169	170344	238110	502898	189873	529713	213407	206617	89100.7	76478.8	93600.6	83171.1	82894.5	86450.4	83978.8	65821	85582.7	465475	107849	100015	94871.1	89988.1	85699.5	82285.8
1021	544.345	619.53	2.65428e+06	2.63569e+06	2.62769e+06	2.67583e+06	2.69495e+06	2.6588e+06	2.69347e+06	7.52087e+06	1.26599e+07	6.99936e+06	1.41606e+07	1.17931e+07	1.05636e+07	1.02197e+07	1.21699e+07	1.88719e+07	2.33807e+07	9.11705e+06	5.39771e+06	5.98551e+06	6.70457e+06	1.29437e+07	1.38558e+07	9.41361e+06	7.83271e+06	1.29767e+07	7.16543e+06	1.31962e+07	4.32789e+06	1.19098e+07	9.87473e+06	2.78039e+06	3.55998e+06	2.99399e+06	4.23408e+06	3.08143e+06	3.22719e+06	4.55082e+06	3.05743e+06	3.88196e+06	6.04404e+06	2.20355e+06	3.02952e+06	4.41082e+06	2.79544e+06	4.04173e+06	3.01707e+06
1022	544.385	835.027	82216	98634.8	111413	123685	120930	127770	131906	4021.86	4662.34	1041.15	2189.14	7908.73	2050.11	14874.9	15922.6	23848.3	43348.8	3323.05	2695.9	0	0	3878.17	0	1760.38	2682.46	697.023	5419.03	3035.29	1878.38	2769.99	1091.3	46138.4	28625.2	28691.7	48045.2	31253.9	59186.1	47870.2	54118.7	43643.2	3140.74	59997.7	48539.6	33951.4	46918.2	51153.7	43507.6
1023	544.339	663.679	240425	236000	265506	266574	266547	259405	273248	1.53514e+06	1.50958e+06	1.50388e+06	1.31738e+06	1.57756e+06	1.36048e+06	1.94219e+06	1.93731e+06	1.46567e+06	1.39714e+06	1.51807e+06	1.05201e+06	1.19355e+06	45905.8	63123	67103.1	1.12064e+06	1.47566e+06	78862.4	1.49541e+06	66144.2	1.14673e+06	1.43169e+06	67634.2	24564.2	21114.2	21444.4	22152	21305.1	23141.4	21935.5	222932	20978.5	1.34857e+06	249157	23712.7	25140.7	22155.1	22144.2	21696
1024	545.346	619.53	792124	783349	791066	799450	807676	790305	798192	2.22207e+06	3.74705e+06	2.06741e+06	4.25958e+06	3.52684e+06	3.167e+06	3.01543e+06	3.60447e+06	5.66675e+06	7.22141e+06	2.71777e+06	1.57814e+06	1.75381e+06	1.96548e+06	3.86946e+06	4.12315e+06	2.7823e+06	2.30546e+06	3.87245e+06	2.10425e+06	3.96115e+06	1.27724e+06	3.55607e+06	2.94953e+06	836024	1.05556e+06	891233	1.26761e+06	919590	948797	1.35102e+06	918569	1.16046e+06	1.77091e+06	662495	901006	1.31198e+06	834471	1.18569e+06	893496
1025	545.389	835.036	30351.7	34432.6	40519.6	45226.7	46385.7	46140.3	46136.5	4913.31	3584.15	1865.02	2678.99	6227.61	3144.64	15117.7	30050	18639.3	37880	7254.61	3598.47	316.153	475.023	3093.12	0	2911.23	3626.66	1404.88	7090.27	2851.1	1986.33	4838.06	1552.85	20810.1	12949.1	14514.9	19855.5	13419.2	23818.3	17531.8	19496.4	16727.5	2377.78	24453.5	20780.8	15621.7	21254	21602.4	17234
1026	546.218	307.768	22615.6	23812.7	22058.4	24053.7	22185.6	23668	22210.2	22010	38749.7	57295.6	21801	14685.1	21283.7	68681.1	37487.3	55506.6	66662.6	31699.2	180427	82005.3	69068	51906.5	56287	29212.3	91321.5	28285.3	96204.4	32496.5	129443	43173.5	15653.8	31085.3	21563.4	14229.8	21150.5	11771.3	20138.4	23257.9	9098.63	14969.2	93659.3	29189.2	22776.1	44618.5	25150.1	11055.3	14675
1027	546.357	643.625	674838	671621	678672	685556	687992	682652	695195	1.88263e+06	3.97313e+06	4.98342e+06	4.14718e+06	6.60119e+06	1.59641e+06	3.27224e+06	3.45823e+06	5.22398e+06	5.25953e+06	3.25815e+06	755851	1.49196e+06	1.91659e+06	1.96375e+06	4.40176e+06	2.42351e+06	1.99584e+06	2.91383e+06	1.62747e+06	2.98427e+06	774803	3.08066e+06	2.46623e+06	670196	854212	740267	828106	480910	1.05574e+06	962687	690996	612444	1.1054e+06	554781	467269	812925	415218	853275	834451
1028	546.355	714.446	290110	291824	343064	360078	354916	356248	372823	1.77135e+06	2.52863e+06	2.16134e+06	2.24482e+06	2.32011e+06	1.76758e+06	3.16524e+06	3.29718e+06	3.46356e+06	3.78258e+06	1.75851e+06	1.09321e+06	933770	1.02178e+06	1.87121e+06	1.91077e+06	1.52183e+06	2.0188e+06	1.8475e+06	1.50881e+06	2.0537e+06	1.11048e+06	2.09331e+06	1.58526e+06	697704	660704	632892	548242	519251	594981	507966	511915	490196	1.26254e+06	549094	586158	529005	529217	638611	602492
[truncated: 617 more rows]
[truncated: 60 more columns]

## Sheet: normalized
ID	mz	rt	QC1.mzdata	QC2.mzdata	QC3..mzdata	QC4..mzdata	QC5.mzdata	QC6..mzdata	QC7.mzdata	S1.mzdata	S10.mzdata	S11.mzdata	S12.mzdata	S13.mzdata	S14.mzdata	S15.mzdata	S16.mzdata	S17.mzdata	S18.mzdata	S19.mzdata	S2.mzdata	S20.mzdata	S21.mzdata	S22.mzdata	S23.mzdata	S24.mzdata	S25.mzdata	S26.mzdata	S27.mzdata	S28.mzdata	S29.mzdata	S3.mzdata	S30.mzdata	S31.mzdata	S32.mzdata	S33.mzdata	S34.mzdata	S35.mzdata	S36.mzdata	S37.mzdata	S38.mzdata	S39.mzdata	S4.mzdata	S40.mzdata	S41.mzdata	S42.mzdata	S43.mzdata	S44.mzdata	S45.mzdata
[truncated: 1,645 more rows]
[truncated: 60 more columns]
