# Supplementary material for: Serum metabolomic profiling reveals an increase in homocitrulline in Chinese patients with nonalcoholic fatty liver disease: a retrospective study
Source: PeerJ. 2021 May 3;9:e11346. doi: 10.7717/peerj.11346 (PMC8101472; doi:10.7717/peerj.11346)
Supplement: Supplemental Information 3 [file peerj-09-11346-s003.xlsx]

## Sheet: Sheet1
Group	Gender	Age	FBS	TG	CHOL	ALT	AST	UA
NAFLD	male	23	4.9	1.45	4.79	123	54	445
NAFLD	male	37	5.2	1.06	4.1	17	15	339
NAFLD	male	44	4.8	2.78	5.38	24	18	458
NAFLD	male	50	4.7	1.72	5.73	62	28	320
NAFLD	male	34	5.47	0.77	5.06	101	46	455
NAFLD	male	30	4.2	4.98	5.89	68	29	527
NAFLD	male	21	4.8	1.23	4.67	45	26	350.1
NAFLD	male	55	5.47	2.03	4.66	19.75	19.49	311.7
NAFLD	male	41	5.4	1.12	5.5	142	66	588
NAFLD	male	44	10.1	1.64	6.03	67	27	401.39
NAFLD	male	27	6.4	2.15	5.41	327	119	419
NAFLD	female	54	5.4	1.74	5.43	24	24	295
NAFLD	male	34	4.4	1.58	5.2	57	29	393
NAFLD	male	40	5.6	1.42	4.67	30	22	455
NAFLD	male	40	5.3	0.65	4.24	21	20	339
NAFLD	female	63	5.6	2.03	4.73	9.27	15.98	294.29
NAFLD	male	26	4.2	2.22	5.9	137	105	554
NAFLD	male	36	5.5	1.61	4.2	43	19	360
NAFLD	male	30	4.3	8.47	3.86	25	15	410
NAFLD	male	42	7.6	2.77	4.38	33	20	295
NAFLD	male	45	5.7	3.35	5.61	44	21	360
NAFLD	female	47	4.9	1.72	4.67	16	16	269
NAFLD	male	40	4.9	2.58	4.82	40	28	406
NAFLD	female	57	5.1	2.69	5.05	13	16	231
NAFLD	male	48	8.5	3.9	5.86	23	10	581
NAFLD	male	20	4.6	0.88	5.11	17	13	435
NAFLD	male	18	5.5	1.78	4.5	162	65	531
NAFLD	male	36	5.5	4.99	5.51	134	108	706
NAFLD	male	62	4.8	0.94	4.91	9	13	350
NAFLD	male	38	5.1	2.87	3.63	14	15	485
NAFLD	male	42	9.6	3.39	4.53	45	23	369
NAFLD	female	52	6	2.89	5.49	45	26	341
NAFLD	male	28	5.3	2.82	4.29	65	30	365
NAFLD	female	50	5.4	4.92	4.28	67	42	347
NAFLD	male	22	4.6	1.08	4.3	49	26	315
NAFLD	male	48	4.6	3.66	4.39	26	19	425
NAFLD	male	31	4.7	1.68	4.86	140	64	595
NAFLD	male	48	5.8	8.33	5.41	33	18	354
NAFLD	female	52	5.9	2.95	5.43	16	17	263
NAFLD	male	39	5	0.77	4.05	27	22	234
NAFLD	female	60	5.5	3.74	3.82	50	35	183
NAFLD	male	39	4.5	3.56	5.07	96	37	511
NAFLD	female	62	6.3	2.31	6.07	31	28	300
NAFLD	male	28	5.41	1.81	4.84	82	33	386.31
NAFLD	male	40	5.48	1.99	4.8	64	31	366.4
NAFLD	male	21	5.3	2.98	4.19	97	44	477
NAFLD	male	22	5.8	1.52	4.97	95	41	580
NAFLD	female	39	4.5	0.56	4.59	43	38	218
NAFLD	male	47	5.3	3.06	4.31	12	16	375
NAFLD	male	25	6.3	1.93	4.62	120	47	385
healthy control	female	38	4.94	1.05	4.4	12	16.3	229
healthy control	female	21	4.07	0.92	4.08	30.53	21.94	247
healthy control	female	26	4.52	1.39	3.65	14.1	17.5	230
healthy control	female	37	4.27	0.69	4.27	12.9	13.7	192
healthy control	male	37	4.85	1.05	3.72	14.2	24.6	260
healthy control	female	55	4.39	1.5	4.55	17.3	18.7	288
healthy control	male	25	4.68	0.96	4.34	24.6	26.5	339
healthy control	female	32	5.5	1.34	3.46	9.2	14.7	249
healthy control	male	25	5.29	1.45	14.1	25.5	19.8	384
healthy control	male	31	4.93	0.89	4.16	24.7	24.7	298
healthy control	female	35	4.17	0.51	5.41	10.6	15.9	184
healthy control	female	30	4.99	0.98	3.92	16.1	15.9	173
healthy control	female	37	4.01	0.9	5.45	12.5	18.7	312
healthy control	male	42	4.44	1.13	4.05	12.8	16.7	290
healthy control	male	58	5	0.73	3.73	25	24.1	333
healthy control	male	30	4.5	0.35	3.92	33.6	22.9	277
healthy control	female	31	5.67	0.58	4.02	21.1	20.2	199
healthy control	male	42	4.68	0.67	5.15	20.1	17.5	460
healthy control	female	35	5.18	1.69	5.01	15.1	15.7	269
healthy control	female	49	4.67	0.69	3.82	12.7	15.2	200
healthy control	female	42	6.82	0.44	3.69	19.8	19.6	268
healthy control	male	42	5.29	1.06	4.71	26.9	16.3	302.34
healthy control	male	45	4.89	1.33	4.19	35.1	15.1	351
healthy control	female	28	4.56	0.47	3.81	13.7	22.3	196
healthy control	female	27	4.65	0.3	4.38	13.5	15.4	233
healthy control	male	33	4.74	0.77	4.07	17.5	30.3	378
healthy control	female	26	4.95	1.46	4.73	54.91	31.25	363.97
healthy control	male	38	4.99	1.22	3.62	22.3	21	407
healthy control	female	33	4.28	0.72	4.45	11.8	14	250
healthy control	male	44	5.15	0.65	4.02	21.8	19.1	413
healthy control	female	51	5.15	0.65	4.02	21.8	19.1	413
healthy control	male	40	4.76	1.45	4.75	15.3	24	310
healthy control	female	23	4.4	0.81	3.91	8.2	13.6	386
healthy control	male	25	4.89	0.52	4.15	20.6	16.3	201
healthy control	female	40	4.81	0.75	4.93	14.9	16.5	327
healthy control	male	30	4.67	1.68	4.84	19.8	19	455
healthy control	female	34	4.61	0.82	4.31	14.8	14.4	279
healthy control	female	40	4.25	0.6	4.61	13.7	17.7	274
healthy control	male	45	4.24	0.7	5.57	12.5	18.1	308
healthy control	female	28	4.65	0.73	4.38	13.5	15.4	233
healthy control	male	57	5.24	0.96	4.94	24.6	25.2	277
healthy control	female	32	4.7	0.63	5.14	14.5	18.8	202
healthy control	female	27	4.72	0.95	4.08	9.7	13.8	210
healthy control	male	29	5.55	0.99	4.93	25.7	25.9	356
healthy control	female	50	5.88	0.49	4.75	16.4	13.1	290
healthy control	male	59	4.78	1.4	4.03	23.6	28.9	217
healthy control	female	38	4.98	0.68	3.71	15.3	16.5	262
healthy control	female	46	4.68	0.9	4.37	11.8	15.1	210
healthy control	female	44	4.97	0.91	4.38	10.2	15.6	257
healthy control	male	51	4.91	0.93	3.45	29	29.8	367
