# Supplementary material for: Serum metabolomic profiling reveals an increase in homocitrulline in Chinese patients with nonalcoholic fatty liver disease: a retrospective study
Source: PeerJ journal article supplement (doi:10.7717/peerj.11346), 2021-05-03

**A**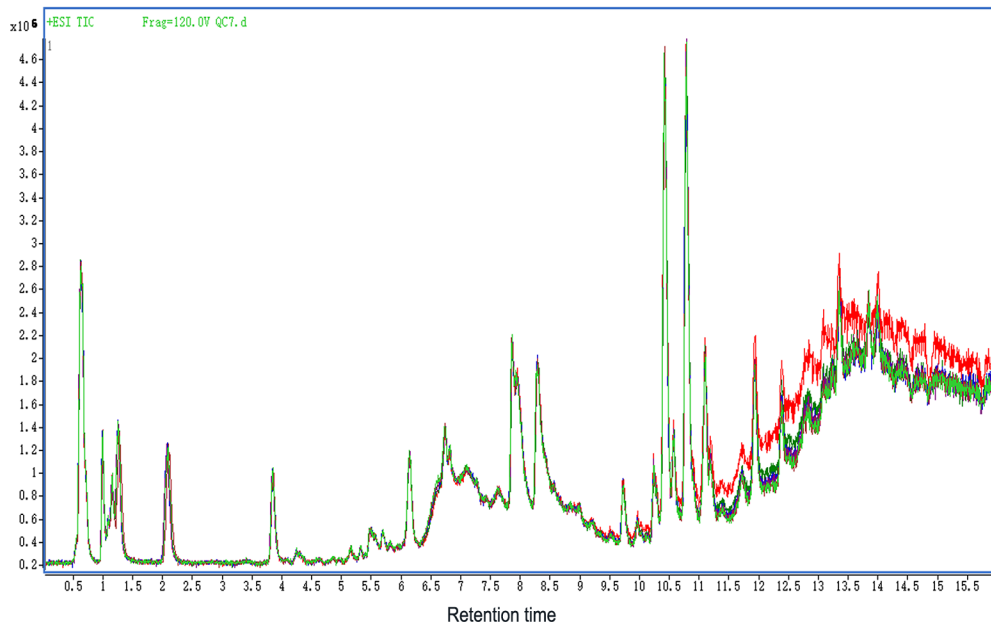**B**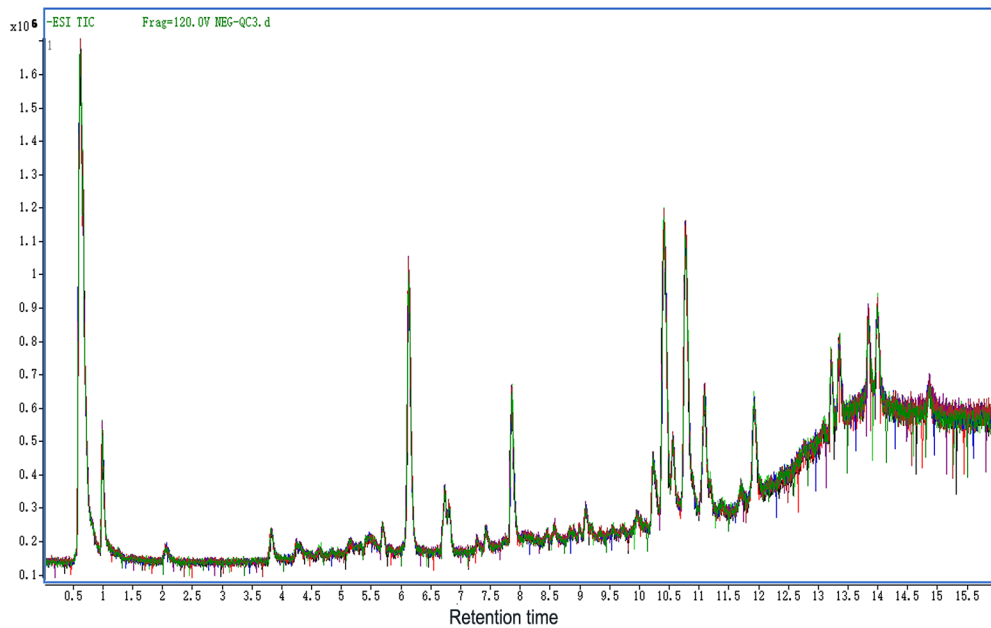

Supplement: Supplementary_Figure_1.pdf [file Supplementary_Figure_1.pdf]
